# Supplementary material for: Single-cell RNA-sequencing profiles reveal the developmental landscape of hawthorn leaves
Source: Research Square preprint supplement (doi:10.21203/rs.3.rs-8423721/v1), 2026-01-12
Supplement: Supplementary file 1 [file 813458fed191637754ab1ad1.xlsx]

## Sheet: Supplemental Table S1
Supplemental Table S1. Summary of 6,024 differentially expressed genes identified across sixteen cell clusters in hawthorn leaves
p_val	avg_log2FC	pct.1	pct.2	p_val_adj	cluster	gene
0	2.26594433849045	0.678	0.306	0	0	Crsca06aG0026300
0	2.45480121713956	0.455	0.155	0	0	Crsca11aG0017000
0	2.53198889075628	0.346	0.102	0	0	Crsca11aG0263000
0	3.26807861392452	0.284	0.055	0	0	Crsca01aG0022300
0	2.1870398064949	0.322	0.113	0	0	Crsca04aG0021500
0	0.825460675266824	0.692	0.487	0	0	CrscaPtG0004700
0	1.82290977953537	0.377	0.176	0	0	Crsca05aG0029500
0	1.79753039238142	0.363	0.163	0	0	Crsca12aG0141100
0	0.67140637750979	0.841	0.643	0	0	CrscaPtG0002900
0	2.45652965868676	0.265	0.073	0	0	Crsca04aG0332200
0	0.713887211169087	0.751	0.564	0	0	CrscaPtG0000100
0	1.28554	0.639	0.466	0	0	Crsca08aG0239500
0	1.4646708836569	0.384	0.212	0	0	Crsca16aG0095100
0	0.794394348320394	0.795	0.652	0	0	Crsca14aG0220700
0	0.492060101074415	0.906	0.793	0	0	CrscaPtG0004600
0	0.669946287646686	0.881	0.791	0	0	Crsca03aG0221800
0	0.589505395543026	0.994	0.984	0	0	Crsca08aG0038800
6.15874991344556e-289	1.51458940966631	0.332	0.174	2.87428858460504e-284	0	Crsca07aG0105600
6.67944421011845e-281	0.616895192000407	0.784	0.729	3.11729661286228e-276	0	Crsca05aG0077800
5.11609904204633e-264	0.746880840160173	0.615	0.466	2.38768342292302e-259	0	CrscaPtG0002800
1.36551370358894e-235	1.91742810175297	0.253	0.124	6.37285245464958e-231	0	Crsca13aG0138800
2.02142791379769e-235	0.506702652805598	0.793	0.686	9.43400407369384e-231	0	CrscaPtG0002400
2.15542334767023e-232	1.44686823125353	0.335	0.199	1.0059360763577e-227	0	Crsca17aG0017000
8.22382666522097e-229	0.667811577674024	0.619	0.487	3.83805990465863e-224	0	CrscaPtG0003200
3.78802431790243e-227	0.81473016406466	0.641	0.535	1.76787094916507e-222	0	Crsca13aG0028600
1.20298059665794e-220	0.938867099468729	0.474	0.335	5.61431044460258e-216	0	Crsca08aG0218700
5.90711026897851e-214	0.753984650654515	0.608	0.507	2.75684836253227e-209	0	Crsca14aG0044500
2.57212799430117e-203	0.849304759231906	0.544	0.442	1.20041213494036e-198	0	Crsca14aG0222200
2.38179756930909e-201	1.05354863598841	0.435	0.309	1.11158492559655e-196	0	Crsca08aG0068200
1.10995978583075e-190	0.376529673011827	0.857	0.795	5.18018232047211e-186	0	Crsca02aG0254100
3.0409570544183e-184	1.43431362152442	0.252	0.135	1.41921465729702e-179	0	Crsca02aG0316600
4.83351517516359e-182	1.33140742467927	0.357	0.244	2.25580153224885e-177	0	Crsca05aG0083000
3.00121300343494e-180	0.57749327621686	0.63	0.519	1.40066610870309e-175	0	CrscaPtG0003100
7.96834151261745e-179	1.03253541435773	0.408	0.291	3.71882498393857e-174	0	Crsca13aG0206300
7.33597526951168e-168	1.29890226418238	0.255	0.142	3.4236996582811e-163	0	Crsca14aG0043900
1.23439486359611e-164	1.27579345809291	0.279	0.165	5.76092082840303e-160	0	Crsca11aG0132300
9.46653040973604e-159	1.26548983542097	0.292	0.181	4.41802974222381e-154	0	Crsca02aG0188600
2.3566037467684e-158	0.727313900359546	0.498	0.386	1.09982696861681e-153	0	Crsca09aG0210600
3.68841578408324e-158	0.898526181830794	0.432	0.324	1.72138364643165e-153	0	Crsca12aG0129100
3.75864941165037e-158	0.888959761072093	0.352	0.231	1.75416168041723e-153	0	Crsca03aG0006000
6.45865197392711e-153	1.13526638933529	0.324	0.214	3.01425287623178e-148	0	Crsca05aG0157600
2.63509273968448e-148	0.422295038124932	0.738	0.673	1.22979778161075e-143	0	CrscaPtG0002200
5.09246658240881e-148	1.3104776042405	0.253	0.149	2.37665415401019e-143	0	Crsca05aG0128600
7.95425570512392e-141	1.01140273244769	0.383	0.281	3.71225113758133e-136	0	Crsca01aG0112600
3.36009158754991e-140	1.36436351635584	0.256	0.157	1.56815474390954e-135	0	Crsca14aG0000800
2.40549221635169e-139	0.849315164564627	0.375	0.265	1.12264321737134e-134	0	CrscaPtG0000700
1.38626588220081e-136	1.0702966213926	0.299	0.193	6.46970287223119e-132	0	Crsca03aG0090600
1.1985109667208e-131	0.647325359009602	0.553	0.476	5.59345068168598e-127	0	Crsca02aG0065300
5.51266023400636e-130	0.923958033523908	0.342	0.239	2.57275853121077e-125	0	Crsca01aG0272300
1.32914037434053e-125	1.29937785779075	0.255	0.16	6.20309812704723e-121	0	Crsca10aG0223200
1.33725211300927e-119	0.934701946313241	0.356	0.261	6.24095561141425e-115	0	Crsca01aG0096900
3.09503284877578e-118	0.810319126900634	0.418	0.324	1.44445183052365e-113	0	Crsca04aG0139100
1.28443709434991e-117	0.82919528043014	0.407	0.316	5.99446791933102e-113	0	Crsca16aG0065200
5.78251940671967e-116	1.02540976810184	0.308	0.215	2.69870180711607e-111	0	Crsca16aG0100500
1.61579519015373e-115	1.06412448041763	0.301	0.208	7.54091615244746e-111	0	Crsca09aG0236600
3.09738594255863e-112	0.481150262541905	0.586	0.487	1.44555001939211e-107	0	Crsca17aG0201400
3.49659393936029e-111	0.737980256192195	0.416	0.322	1.63186039149945e-106	0	Crsca06aG0049500
2.02806724789463e-105	1.03635163586681	0.313	0.225	9.46498984592422e-101	0	Crsca05aG0101200
6.18931586748404e-103	0.823438857168276	0.455	0.387	2.8885537153548e-98	0	Crsca03aG0266300
1.35462318835684e-99	0.556195290568168	0.704	0.676	6.32202642006137e-95	0	Crsca11aG0072600
1.41918347774316e-99	1.13389429509514	0.264	0.18	6.62332929062731e-95	0	Crsca07aG0219800
5.2818491063806e-99	0.753007339170571	0.441	0.367	2.46503897794782e-94	0	Crsca06aG0121500
4.57463889596659e-94	1.06119823107171	0.267	0.186	2.13498397274761e-89	0	Crsca08aG0069900
2.30495469171002e-93	0.616718431790954	0.514	0.448	1.07572235462107e-88	0	Crsca03aG0103500
2.39806499659222e-93	0.649769104686979	0.489	0.427	1.11917693390959e-88	0	Crsca14aG0202600
2.23437782048404e-92	0.499067522682596	0.56	0.492	1.0427841288199e-87	0	Crsca11aG0065100
3.45847213274124e-90	0.7888226345808	0.327	0.242	1.61406894435034e-85	0	Crsca03aG0001400
1.99751986404882e-89	0.535508270859772	0.53	0.468	9.32242520551583e-85	0	CrscaPtG0002600
1.25476165117356e-86	1.05164261283159	0.303	0.228	5.85597262602699e-82	0	Crsca13aG0125800
8.31796641635998e-84	0.995428787171545	0.262	0.185	3.8819949265152e-79	0	Crsca06aG0021100
1.81065171688443e-81	0.953544413577361	0.264	0.187	8.45031156269961e-77	0	Crsca02aG0281200
4.57481683570461e-81	0.840710547649727	0.344	0.271	2.13506701722334e-76	0	Crsca11aG0208800
6.33201065999365e-81	0.422615118669016	0.51	0.428	2.95514937501904e-76	0	Crsca08aG0203900
7.72496051312059e-80	0.962448864614193	0.259	0.183	3.60523907147338e-75	0	Crsca16aG0152100
5.85395229748172e-79	0.746051377409181	0.389	0.321	2.73203953723472e-74	0	Crsca09aG0111500
1.79429820265913e-78	0.768068169381618	0.359	0.287	8.37398971181016e-74	0	Crsca07aG0111300
6.03196023795484e-78	0.734575451446558	0.396	0.329	2.81511584305353e-73	0	Crsca01aG0035800
5.12298622894462e-76	0.788561888592171	0.359	0.288	2.39089767304845e-71	0	Crsca05aG0018300
8.86746900697155e-76	0.70569383662544	0.362	0.286	4.13844778555362e-71	0	Crsca09aG0153900
1.31865817477223e-74	0.867159940283019	0.329	0.261	6.154177701662e-70	0	Crsca08aG0183000
2.01708381883027e-74	0.794939065224439	0.357	0.29	9.41373018248086e-70	0	Crsca15aG0087100
3.57581622070842e-73	0.674173963320766	0.416	0.355	1.66883343020462e-68	0	Crsca05aG0205800
6.22017451514732e-73	0.68504247372703	0.344	0.271	2.90295544621925e-68	0	CrscaPtG0002300
5.56697473991938e-72	0.948779185375528	0.269	0.199	2.59810711112038e-67	0	Crsca09aG0262500
1.05027127485228e-69	0.486592039775418	0.623	0.613	4.90161603973561e-65	0	Crsca05aG0142700
5.12438896765451e-68	0.624572411827385	0.447	0.395	2.39155233120436e-63	0	Crsca13aG0126400
1.59475699082265e-67	0.878881759991654	0.307	0.242	7.44273087616929e-63	0	Crsca11aG0155000
4.33121693634345e-67	0.867799633979856	0.286	0.218	2.02137894419149e-62	0	Crsca14aG0062700
7.56826358556678e-67	0.48946642479614	0.474	0.411	3.53210861538402e-62	0	CrscaPtG0003900
1.13146642669315e-66	0.622248610021779	0.364	0.293	5.28055381337693e-62	0	Crsca02aG0312600
4.04734788449255e-64	0.547211731926389	0.521	0.489	1.88889725769267e-59	0	Crsca01aG0121600
5.27328552287656e-62	1.02119587048437	0.251	0.189	2.46104235352649e-57	0	Crsca16aG0095800
1.02654472970889e-61	0.60292613387095	0.521	0.497	4.79088425355137e-57	0	Crsca08aG0155000
7.81380689481634e-61	0.808633199139343	0.299	0.237	3.64670367781079e-56	0	Crsca02aG0218400
5.0648700942179e-60	0.57879178397196	0.474	0.431	2.3637748729715e-55	0	Crsca11aG0160900
7.68798022199503e-60	0.45522544092454	0.664	0.67	3.58798036960508e-55	0	Crsca08aG0003200
5.11261291085562e-58	0.467975220803992	0.568	0.552	2.38605644549632e-53	0	Crsca02aG0335800
6.55570778602118e-58	0.56159242357632	0.46	0.419	3.05954882373609e-53	0	Crsca06aG0112600
2.16669155241637e-57	0.608550496111062	0.514	0.486	1.01119494751272e-52	0	Crsca04aG0224800
1.35826619145216e-54	0.723116397025434	0.325	0.267	6.33902831550721e-50	0	Crsca15aG0194800
6.01210359953367e-54	0.686323415696291	0.384	0.335	2.80584874990236e-49	0	Crsca09aG0186600
1.35423594817053e-52	0.688845945035625	0.338	0.283	6.32021917011188e-48	0	Crsca02aG0044100
3.68633854513841e-52	0.347918961480934	0.305	0.439	1.7204141990161e-47	0	Crsca16aG0139100
6.84307654738079e-52	0.550880172149295	0.529	0.51	3.19366382466262e-47	0	Crsca13aG0000600
8.18905949104791e-52	0.663793262282215	0.3	0.24	3.82183406447206e-47	0	CrscaPtG0001000
8.36885822874455e-52	0.569072820230433	0.463	0.429	3.90574613535508e-47	0	Crsca07aG0178700
2.31186125600477e-51	0.560462168723643	0.416	0.365	1.07894564817743e-46	0	Crsca14aG0225400
6.68987143927125e-50	0.662220078584409	0.359	0.307	3.12216300070789e-45	0	Crsca13aG0083300
9.20469570263206e-50	0.762033310913176	0.251	0.192	4.29583148441838e-45	0	Crsca14aG0166500
1.24220068637862e-49	0.625556342690871	0.494	0.461	5.79735060332902e-45	0	Crsca02aG0128700
1.47608356603865e-46	0.464465672579143	0.398	0.347	6.88888200270238e-42	0	Crsca10aG0127400
2.32997112233775e-46	0.707478754052505	0.348	0.303	1.08739752279503e-41	0	Crsca14aG0208100
3.60931617338703e-46	0.589670740589693	0.386	0.34	1.68446785811973e-41	0	Crsca02aG0133300
1.52207067249108e-45	0.731238110703254	0.301	0.25	7.10350382851585e-41	0	Crsca17aG0189400
2.71923867996887e-44	0.716112024991759	0.257	0.202	1.26906869194147e-39	0	CrscaPtG0004900
6.66599300197095e-43	0.612187080201413	0.325	0.274	3.11101893401984e-38	0	Crsca11aG0263600
7.07173335781225e-43	0.798305239581359	0.262	0.211	3.30037795809098e-38	0	Crsca09aG0213100
1.94874134700541e-42	0.622560155754809	0.345	0.295	9.09477586647427e-38	0	Crsca01aG0095300
3.03146848720935e-42	0.729523137727104	0.266	0.215	1.4147863429806e-37	0	Crsca11aG0003300
8.50168881014427e-41	0.543452299238388	0.554	0.553	3.96773816769433e-36	0	Crsca13aG0116500
1.29919676745973e-40	0.588233271629166	0.395	0.357	6.06335131373456e-36	0	Crsca01aG0209600
8.23972092598286e-40	0.819084106913025	0.256	0.209	3.8454777561562e-35	0	Crsca07aG0097500
2.50623429047485e-39	0.456812038859058	0.391	0.342	1.16965954336461e-34	0	Crsca15aG0099700
2.89408874892907e-36	0.590452122055895	0.381	0.348	1.3506712191252e-31	0	Crsca08aG0090400
5.24540649715934e-36	0.626628323789783	0.342	0.304	2.44803121222427e-31	0	Crsca08aG0170100
5.48310898288548e-35	0.303132161429831	0.529	0.492	2.55896696231265e-30	0	CrscaMtG0005800
7.0303874863803e-35	0.62551469938087	0.327	0.288	3.28108183989369e-30	0	Crsca15aG0210800
7.94272926771837e-35	0.627754253012347	0.309	0.266	3.70687174924416e-30	0	Crsca04aG0070700
2.17575770749578e-34	0.543870725528967	0.433	0.412	1.01542612208828e-29	0	Crsca02aG0024300
5.22673980897814e-34	0.583310673309982	0.332	0.29	2.4393194688501e-29	0	Crsca09aG0089100
2.93766214503545e-33	0.610390134919824	0.338	0.301	1.37100692308804e-28	0	Crsca17aG0115100
7.23488934709318e-33	0.667343302948791	0.309	0.269	3.37652285828839e-28	0	Crsca03aG0075600
8.31548614082377e-33	0.560987045016059	0.428	0.411	3.88083738192245e-28	0	Crsca07aG0168000
1.16397303615186e-32	0.489176053330466	0.389	0.355	5.43226215972072e-28	0	Crsca05aG0002400
2.59437992374774e-32	0.644574270693117	0.401	0.376	1.21079711041307e-27	0	Crsca10aG0094200
2.6504969115316e-32	0.62347755064116	0.266	0.223	1.2369869086118e-27	0	Crsca03aG0010300
5.30712577964546e-32	0.565012222883464	0.329	0.289	2.47683560136054e-27	0	Crsca08aG0198900
3.02570858534917e-31	0.612543854395806	0.305	0.266	1.41209819678246e-26	0	Crsca04aG0100100
8.12434021608661e-31	0.616930446328452	0.368	0.341	3.79162957884762e-26	0	Crsca10aG0029900
1.16495788228109e-30	0.611374206294854	0.366	0.336	5.43685843660585e-26	0	Crsca02aG0326500
2.01744581706867e-30	0.541219426888905	0.455	0.446	9.4154196282595e-26	0	Crsca01aG0067100
6.38250667423451e-30	0.632728026937474	0.29	0.252	2.97871586486525e-25	0	Crsca14aG0043100
9.08469945825674e-29	0.701419186515953	0.255	0.216	4.23982923716842e-24	0	Crsca06aG0201900
5.47733421522435e-28	0.378558875335504	0.379	0.34	2.5562718782452e-23	0	Crsca09aG0178100
8.86317608662564e-28	0.52545602502791	0.336	0.303	4.13644427962819e-23	0	Crsca08aG0231800
2.99597046902101e-27	0.477208335653963	0.426	0.408	1.39821941789211e-22	0	Crsca07aG0101700
4.46857557864695e-27	0.417965448406318	0.566	0.579	2.08548422255453e-22	0	Crsca02aG0154800
2.31996754717628e-26	0.668273448676879	0.26	0.224	1.08272885426717e-21	0	Crsca03aG0027000
2.56018402840876e-26	0.567604575465689	0.346	0.319	1.19483788605837e-21	0	Crsca16aG0117000
8.95067066101422e-26	0.579698550102307	0.303	0.27	4.17727799749534e-21	0	Crsca17aG0116800
1.08008701199725e-25	0.681486126960812	0.254	0.219	5.04076608499118e-21	0	Crsca03aG0311000
4.03406148917173e-25	0.573317057134268	0.343	0.317	1.88269649699645e-20	0	Crsca03aG0036400
4.50039907394453e-25	0.634869650993875	0.291	0.259	2.10033624780991e-20	0	Crsca04aG0280400
4.76106762011498e-25	0.569667757156649	0.337	0.31	2.22199025830766e-20	0	Crsca10aG0187400
6.37030604554042e-25	0.666937683666161	0.25	0.215	2.97302183145371e-20	0	Crsca05aG0185400
3.84818980692564e-24	0.672336446453668	0.25	0.216	1.7959501828922e-19	0	Crsca08aG0050400
2.18698723892492e-23	0.627535094479515	0.287	0.257	1.02066694440626e-18	0	Crsca14aG0112800
1.94363366995044e-22	0.616726974310049	0.278	0.248	9.07093833765869e-18	0	Crsca13aG0027600
2.28990803175531e-22	0.619538961781739	0.268	0.237	1.0687000784202e-17	0	Crsca14aG0098300
4.00380869246818e-22	0.460859774058244	0.39	0.371	1.8685775167749e-17	0	Crsca02aG0208600
5.79993823803437e-22	0.539810199559951	0.273	0.24	2.70683117569064e-17	0	Crsca17aG0251200
9.01041206322302e-22	0.367793914666815	0.489	0.468	4.20515930990618e-17	0	Crsca05aG0189500
2.26287627815278e-21	0.491090571899908	0.36	0.338	1.0560843590139e-16	0	Crsca02aG0090400
3.47689698422176e-21	0.527599497551402	0.467	0.464	1.6226678225363e-16	0	Crsca04aG0281900
4.08823226220374e-21	0.502132735866661	0.299	0.269	1.90797799677048e-16	0	Crsca08aG0240600
2.0198988967793e-20	0.592047558198841	0.263	0.233	9.42686815126901e-16	0	Crsca03aG0299100
6.3693980747747e-20	0.471646584222189	0.335	0.311	2.97259808149735e-15	0	Crsca03aG0256700
1.02773121896858e-18	0.511817284430032	0.408	0.402	4.79642159892635e-14	0	Crsca05aG0169300
1.09249464760363e-18	0.506682286856607	0.297	0.271	5.09867252036615e-14	0	Crsca09aG0170900
1.18259940500938e-18	0.274611795659398	0.442	0.414	5.51919142317878e-14	0	Crsca12aG0070100
2.29830942951482e-18	0.599602780527219	0.253	0.225	1.07262101075457e-13	0	Crsca08aG0198200
3.21167315587728e-18	0.33326613208033	0.499	0.507	1.49888786184793e-13	0	Crsca02aG0241100
8.97466562288683e-18	0.429132058342962	0.373	0.357	4.18847644620128e-13	0	Crsca11aG0193400
1.08792864839904e-17	0.486465304406544	0.275	0.248	5.07736300207834e-13	0	CrscaPtG0004800
1.62911460010532e-17	0.63227688559905	0.344	0.33	7.60307783869152e-13	0	Crsca10aG0195200
3.84896250593412e-17	0.652211413659902	0.362	0.355	1.79631080151945e-12	0	Crsca05aG0033700
1.40839125062176e-16	0.58754614888713	0.374	0.368	6.57296196665175e-12	0	Crsca17aG0159900
1.55227517996293e-16	0.425049131423738	0.484	0.499	7.24446826488701e-12	0	Crsca03aG0216800
2.98532871259846e-16	0.257834993444114	0.52	0.522	1.3932529101697e-11	0	CrscaMtG0002600
5.86425631405819e-16	0.51335626947236	0.401	0.397	2.73684842177096e-11	0	Crsca13aG0185500
7.33906351137934e-16	0.569064062539139	0.355	0.347	3.42514094076074e-11	0	Crsca11aG0035200
1.81963556347417e-15	0.596976258632253	0.356	0.346	8.49223917473396e-11	0	Crsca13aG0084100
8.95973968860176e-15	0.540832443183556	0.431	0.431	4.18151051267044e-10	0	Crsca04aG0224100
1.60998760202417e-14	0.504294574022093	0.31	0.294	7.51381213864678e-10	0	Crsca12aG0148200
1.1194175362625e-13	0.395943724334753	0.519	0.545	5.2243216417371e-09	0	Crsca03aG0199400
4.6560894994484e-13	0.394956540375323	0.499	0.518	2.17299696939257e-08	0	Crsca17aG0248300
5.68909637824755e-13	0.355136902475052	0.548	0.631	2.65510127972813e-08	0	Crsca02aG0126600
1.14976219809307e-12	0.463563201376123	0.33	0.318	5.36594017850036e-08	0	Crsca11aG0168600
1.26049226199065e-12	0.501775317335214	0.257	0.238	5.88271738671034e-08	0	Crsca08aG0197200
1.35438127472727e-12	0.377030322812109	0.383	0.377	6.32089740915217e-08	0	Crsca13aG0070200
7.34092422710334e-12	0.38696426581794	0.344	0.334	3.42600933678913e-07	0	Crsca11aG0110900
1.20899686848079e-11	0.509639255291118	0.321	0.312	5.64238838519985e-07	0	Crsca01aG0270700
2.42592275545187e-11	0.533028339392623	0.363	0.358	1.13217814996939e-06	0	Crsca03aG0116800
3.95674235521135e-11	0.634366100962214	0.253	0.24	1.84661165717714e-06	0	Crsca05aG0068400
7.16636034292807e-10	0.41116263100777	0.307	0.296	3.34454037204453e-05	0	Crsca12aG0132500
1.1256590125628e-09	0.513618636197404	0.251	0.234	5.25345061163058e-05	0	Crsca06aG0191900
1.44818151634618e-09	0.380474537164711	0.445	0.449	6.75866313678762e-05	0	Crsca07aG0182000
3.0297648560893e-09	0.588145916304761	0.433	0.452	0.000141399125833688	0	Crsca02aG0065400
8.35844256034e-09	0.383928155360203	0.266	0.25	0.000390088514291068	0	Crsca09aG0121600
3.93178570511295e-08	0.456666790620435	0.318	0.317	0.00183496438857621	0	Crsca10aG0245000
5.97503815552363e-07	0.371460989011194	0.274	0.33	0.0278855030718288	0	Crsca11aG0207500
6.54404125686296e-07	0.501883446194463	0.257	0.249	0.0305410405457794	0	Crsca11aG0204000
8.69095942594929e-07	0.492916456097179	0.464	0.498	0.0405607076409053	0	Crsca06aG0176700
1.02714418263833e-06	0.433160202296389	0.252	0.243	0.047936819003731	0	Crsca08aG0194600
1.97334167579436e-06	0.440042191966903	0.3	0.299	0.0920958560093226	0	Crsca12aG0181600
2.07091464714516e-06	0.473062724918089	0.324	0.327	0.0966495865822647	0	Crsca17aG0098200
2.74742440963883e-06	0.34704651328494	0.298	0.291	0.128222297197844	0	Crsca09aG0209200
1.19369565394141e-05	0.357766334091534	0.315	0.315	0.557097761694456	0	Crsca15aG0005400
1.50694351790551e-05	0.434915295216796	0.299	0.3	0.703290539806501	0	Crsca09aG0273800
1.80582709590419e-05	0.555399027864962	0.301	0.304	0.842779505658488	0	Crsca02aG0209300
2.23242999672339e-05	0.360254808447956	0.306	0.304	1	0	Crsca17aG0101600
2.45154278372805e-05	0.295657260790831	0.405	0.464	1	0	Crsca06aG0095700
7.86189699413294e-05	0.477657635096832	0.266	0.265	1	0	Crsca12aG0113300
0.000212896854264036	0.65745148683175	0.29	0.303	1	0	Crsca05aG0162700
0.00026009265619963	0.327607107697348	0.313	0.315	1	0	Crsca16aG0042100
0.00140815519424105	0.360616785164251	0.288	0.293	1	0	Crsca06aG0239300
0.00606171350401295	0.364901709025612	0.255	0.257	1	0	Crsca16aG0092600
0.00808455420972904	0.359064216341803	0.254	0.256	1	0	Crsca03aG0265900
0	2.86486429819524	0.661	0.214	0	1	Crsca09aG0277300
0	2.33673164142316	0.662	0.218	0	1	Crsca07aG0197500
0	2.40359690300365	0.696	0.254	0	1	Crsca17aG0206500
0	2.09029434356987	0.741	0.307	0	1	Crsca03aG0331200
0	2.12629372191028	0.704	0.282	0	1	Crsca13aG0119300
0	2.16318722704271	0.851	0.43	0	1	Crsca12aG0024400
0	2.0830051535476	0.661	0.241	0	1	Crsca02aG0293200
0	1.96461751767804	0.692	0.283	0	1	Crsca01aG0088500
0	2.41378332306407	0.817	0.408	0	1	Crsca04aG0214200
0	2.08456080349474	0.627	0.229	0	1	Crsca17aG0136500
0	2.6457679337085	0.533	0.138	0	1	Crsca07aG0057000
0	1.86333	0.641	0.248	0	1	Crsca07aG0050800
0	2.1980127632228	0.855	0.462	0	1	Crsca11aG0259500
0	1.96367440925347	0.756	0.365	0	1	Crsca17aG0175900
0	2.35347251839962	0.679	0.292	0	1	Crsca16aG0205100
0	2.22867193039215	0.559	0.173	0	1	Crsca03aG0304500
0	1.58060122595081	0.728	0.342	0	1	Crsca15aG0033100
0	2.43117342949428	0.595	0.21	0	1	Crsca09aG0270000
0	1.9355572401376	0.607	0.228	0	1	Crsca12aG0094000
0	1.8079262211429	0.616	0.244	0	1	Crsca16aG0149600
0	1.88703755904706	0.685	0.314	0	1	Crsca11aG0055800
0	2.36095813916125	0.526	0.155	0	1	Crsca07aG0160200
0	0.942996294434221	0.698	0.327	0	1	Crsca16aG0139100
0	2.11102248828037	0.526	0.156	0	1	Crsca14aG0125800
0	2.76540543029708	0.49	0.12	0	1	Crsca15aG0144900
0	1.90215553779846	0.686	0.319	0	1	Crsca17aG0140200
0	2.78556742363735	0.47	0.103	0	1	Crsca10aG0059200
0	2.40313646418342	0.551	0.185	0	1	Crsca14aG0038900
0	2.42857549934579	0.52	0.154	0	1	Crsca04aG0189800
0	2.58654892418061	0.483	0.119	0	1	Crsca06aG0173000
0	1.44005090707994	0.797	0.434	0	1	Crsca04aG0002300
0	1.70122694023626	0.821	0.458	0	1	Crsca11aG0121800
0	2.48925744175265	0.535	0.174	0	1	Crsca12aG0029100
0	2.01365491898844	0.552	0.198	0	1	Crsca09aG0077400
0	2.38153898793242	0.498	0.145	0	1	Crsca01aG0197000
0	2.0204490017668	0.693	0.342	0	1	Crsca14aG0140200
0	1.98652067325637	0.553	0.203	0	1	Crsca16aG0132900
0	1.81346815012731	0.605	0.256	0	1	Crsca04aG0270600
0	2.25841894375111	0.495	0.148	0	1	Crsca05aG0098500
0	2.44275731282572	0.472	0.126	0	1	Crsca09aG0033900
0	2.67629160244671	0.461	0.121	0	1	Crsca03aG0299300
0	2.21314532604883	0.52	0.18	0	1	Crsca16aG0209400
0	1.54916288547147	0.698	0.359	0	1	Crsca04aG0143400
0	1.45471626185326	0.658	0.322	0	1	Crsca01aG0244300
0	2.0394225327625	0.847	0.513	0	1	Crsca04aG0318700
0	2.27505410688827	0.578	0.244	0	1	Crsca17aG0127100
0	2.42609511454258	0.449	0.116	0	1	Crsca01aG0010600
0	1.75184885224084	0.575	0.245	0	1	Crsca06aG0128600
0	1.33455284008318	0.703	0.375	0	1	Crsca11aG0121900
0	1.53578663908595	0.767	0.44	0	1	Crsca09aG0240300
0	1.68249211039542	0.629	0.304	0	1	Crsca03aG0089700
0	1.58366269829959	0.576	0.251	0	1	Crsca05aG0150200
0	2.34698612789412	0.468	0.144	0	1	Crsca01aG0295900
0	2.91766307727771	0.498	0.174	0	1	Crsca10aG0189000
0	1.94879405127182	0.521	0.2	0	1	Crsca01aG0092200
0	1.14394100638596	0.616	0.298	0	1	Crsca02aG0139700
0	1.78852863501528	0.5	0.185	0	1	Crsca03aG0049900
0	2.30490413696448	0.498	0.183	0	1	Crsca10aG0189100
0	1.61773769955397	0.568	0.254	0	1	Crsca08aG0096800
0	1.33417370495134	0.68	0.367	0	1	Crsca13aG0157800
0	2.29436313236964	0.421	0.108	0	1	Crsca16aG0200700
0	2.69605922278629	0.433	0.121	0	1	Crsca10aG0188800
0	1.68339272582106	0.495	0.186	0	1	Crsca04aG0334200
0	1.56254384632121	0.595	0.286	0	1	Crsca10aG0173000
0	2.08135789875794	0.652	0.346	0	1	Crsca10aG0188900
0	1.97412539959536	0.589	0.283	0	1	Crsca08aG0086500
0	2.2709976022768	0.456	0.152	0	1	Crsca12aG0084300
0	1.97006675219608	0.441	0.138	0	1	Crsca13aG0238100
0	1.32438554536788	0.509	0.208	0	1	Crsca07aG0130200
0	2.26848166559855	0.426	0.125	0	1	Crsca11aG0184300
0	2.6545974838681	0.392	0.093	0	1	Crsca16aG0209800
0	1.1286081409772	0.761	0.462	0	1	Crsca10aG0055600
0	1.69003574593593	0.577	0.278	0	1	Crsca17aG0133600
0	1.30075158794987	0.695	0.397	0	1	Crsca10aG0171700
0	2.16588328940919	0.405	0.109	0	1	Crsca10aG0058300
0	2.08957395743218	0.448	0.155	0	1	Crsca01aG0083200
0	2.5082514208364	0.388	0.095	0	1	Crsca14aG0179400
0	1.61920870869646	0.499	0.208	0	1	Crsca13aG0005800
0	1.41467638847431	0.881	0.592	0	1	Crsca07aG0130000
0	1.59694637039758	0.497	0.208	0	1	Crsca08aG0118300
0	1.15130405949981	0.582	0.294	0	1	Crsca12aG0163100
0	0.816454883597486	0.468	0.181	0	1	Crsca04aG0324900
0	1.58092504600924	0.471	0.186	0	1	Crsca07aG0064000
0	1.31661898721388	0.637	0.353	0	1	Crsca13aG0099000
0	1.75612367391497	0.424	0.141	0	1	Crsca12aG0288700
0	2.93706862461951	0.37	0.088	0	1	Crsca02aG0236300
0	2.23786897944512	0.442	0.16	0	1	Crsca04aG0165200
0	1.2574904912844	0.636	0.354	0	1	Crsca15aG0126700
0	1.58728216957016	0.699	0.417	0	1	Crsca09aG0215700
0	1.35691035865291	0.572	0.292	0	1	Crsca07aG0209000
0	2.39402327286453	0.374	0.095	0	1	Crsca01aG0256200
0	1.72697946637161	0.611	0.333	0	1	Crsca04aG0023200
0	2.7202334653045	0.37	0.093	0	1	Crsca03aG0215200
0	2.44380425963943	0.36	0.083	0	1	Crsca07aG0138200
0	1.85815898930119	0.418	0.142	0	1	Crsca13aG0160300
0	1.61016086948614	0.467	0.192	0	1	Crsca15aG0018500
0	1.47559223612845	0.599	0.324	0	1	Crsca10aG0150000
0	1.44721545143395	0.469	0.195	0	1	Crsca02aG0014900
0	2.50540844180531	0.369	0.096	0	1	Crsca07aG0191600
0	1.94617855270425	0.563	0.29	0	1	Crsca11aG0040400
0	1.77157169233265	0.482	0.212	0	1	Crsca13aG0121700
0	1.12843945650449	0.741	0.471	0	1	Crsca14aG0012400
0	2.13711394652075	0.387	0.117	0	1	Crsca14aG0227000
0	1.9861801852156	0.415	0.148	0	1	Crsca07aG0043700
0	2.1603974092988	0.369	0.103	0	1	Crsca03aG0298400
0	1.58643053848522	0.407	0.144	0	1	Crsca09aG0195700
0	1.23162410471205	0.428	0.165	0	1	Crsca13aG0121500
0	1.88738129272172	0.499	0.239	0	1	Crsca05aG0037900
0	1.47728770247099	0.489	0.229	0	1	Crsca08aG0021100
0	1.60763610362115	0.523	0.263	0	1	Crsca11aG0189200
0	1.31067400514287	0.462	0.203	0	1	Crsca06aG0260000
0	2.17151498925138	0.373	0.115	0	1	Crsca08aG0255400
0	1.52223330185399	0.563	0.305	0	1	Crsca03aG0056900
0	1.36957212007664	0.57	0.312	0	1	Crsca11aG0263700
0	2.81238720854984	0.316	0.059	0	1	Crsca02aG0057600
0	2.24472397030414	0.413	0.157	0	1	Crsca12aG0020300
0	1.30701915552048	0.718	0.462	0	1	Crsca01aG0207200
0	2.61236722367713	0.321	0.066	0	1	Crsca04aG0272900
0	2.52474742381122	0.332	0.078	0	1	Crsca08aG0255200
0	1.1110013094393	0.654	0.403	0	1	Crsca04aG0219600
0	2.0588598934026	0.352	0.101	0	1	Crsca12aG0253200
0	2.67375874221679	0.343	0.092	0	1	Crsca16aG0145200
0	2.30123645732597	0.339	0.09	0	1	Crsca01aG0025800
0	2.04244826086851	0.379	0.13	0	1	Crsca12aG0144400
0	2.80022465112617	0.323	0.075	0	1	Crsca08aG0056100
0	2.15666963573729	0.383	0.135	0	1	Crsca13aG0230400
0	2.11799743957082	0.341	0.094	0	1	Crsca15aG0117300
0	1.79686762653533	0.374	0.127	0	1	Crsca09aG0239900
0	2.75209586462691	0.304	0.058	0	1	Crsca07aG0163300
0	2.02911947349983	0.372	0.126	0	1	Crsca15aG0116400
0	1.49582840818644	0.394	0.149	0	1	Crsca12aG0013100
0	1.67664673814058	0.389	0.144	0	1	Crsca16aG0180600
0	1.53476107458796	0.872	0.627	0	1	Crsca12aG0069800
0	1.25320054400627	0.597	0.353	0	1	Crsca09aG0006000
0	2.07615927343412	0.37	0.126	0	1	Crsca09aG0217800
0	1.45914991969081	0.52	0.276	0	1	Crsca13aG0122100
0	2.44744247523741	0.325	0.081	0	1	Crsca13aG0229300
0	2.02045466864388	0.344	0.1	0	1	Crsca06aG0141700
0	1.57496083612903	0.453	0.21	0	1	Crsca16aG0210600
0	1.17327259313708	0.742	0.499	0	1	Crsca11aG0029900
0	1.48693158376819	0.491	0.248	0	1	Crsca12aG0084600
0	2.17824218945726	0.337	0.095	0	1	Crsca04aG0301200
0	2.47761056019084	0.312	0.07	0	1	Crsca13aG0122200
0	2.92280475035809	0.303	0.062	0	1	Crsca05aG0093600
0	2.17874978653432	0.383	0.143	0	1	Crsca02aG0220100
0	1.38011725819225	0.461	0.222	0	1	Crsca13aG0067600
0	1.21172522544478	0.645	0.407	0	1	Crsca05aG0028200
0	0.798239285776822	0.798	0.56	0	1	Crsca02aG0126600
0	1.49328740565309	0.431	0.193	0	1	Crsca06aG0050900
0	3.04744544810822	0.295	0.057	0	1	Crsca17aG0151600
0	1.82080739974611	0.376	0.139	0	1	Crsca11aG0136700
0	2.58839551377693	0.3	0.065	0	1	Crsca07aG0217500
0	1.91875656074683	0.359	0.125	0	1	Crsca04aG0321500
0	2.51633863265092	0.309	0.078	0	1	Crsca12aG0071300
0	1.94110019810481	0.378	0.148	0	1	Crsca13aG0091900
0	1.78620118822987	0.348	0.118	0	1	Crsca03aG0189900
0	1.86895728624369	0.332	0.104	0	1	Crsca14aG0088700
0	2.64873897912244	0.294	0.066	0	1	Crsca01aG0116500
0	2.24489579607035	0.311	0.084	0	1	Crsca05aG0040800
0	3.09760115727326	0.28	0.055	0	1	Crsca10aG0079800
0	1.98668707118287	0.301	0.077	0	1	Crsca17aG0003900
0	1.51181567191845	0.384	0.161	0	1	Crsca17aG0116000
0	1.5861896774095	0.379	0.157	0	1	Crsca14aG0110600
0	2.43803413089243	0.283	0.061	0	1	Crsca01aG0018800
0	1.77310281428899	0.336	0.115	0	1	Crsca03aG0092400
0	1.59415979657932	0.346	0.126	0	1	Crsca09aG0077500
0	1.73678241870275	0.351	0.131	0	1	Crsca13aG0236700
0	2.1162662382107	0.317	0.098	0	1	Crsca08aG0255500
0	1.50613080301184	0.346	0.128	0	1	Crsca09aG0108000
0	1.99505572104325	0.303	0.085	0	1	Crsca16aG0154700
0	2.26091248516918	0.303	0.086	0	1	Crsca07aG0130500
0	1.75663395328911	0.36	0.144	0	1	Crsca08aG0026100
0	2.2736653981664	0.289	0.073	0	1	Crsca06aG0141600
0	2.49740844613098	0.275	0.061	0	1	Crsca06aG0141800
0	1.60136521913373	0.34	0.126	0	1	Crsca11aG0065700
0	2.00817477105277	0.311	0.097	0	1	Crsca14aG0097000
0	1.66711171787478	0.348	0.134	0	1	Crsca14aG0116200
0	1.54919120993739	0.325	0.113	0	1	Crsca02aG0104300
0	1.8956255540388	0.324	0.112	0	1	Crsca03aG0336200
0	2.12909177472988	0.291	0.08	0	1	Crsca02aG0332900
0	1.53556033261616	0.329	0.119	0	1	Crsca06aG0164300
0	2.64535019627771	0.262	0.053	0	1	Crsca06aG0283200
0	2.20666254113067	0.308	0.099	0	1	Crsca06aG0120900
0	1.78539472617382	0.301	0.092	0	1	Crsca12aG0079900
0	1.68375393842989	0.333	0.125	0	1	Crsca04aG0287000
0	2.46190719697307	0.264	0.056	0	1	Crsca05aG0073100
0	1.60322934062434	0.337	0.129	0	1	Crsca08aG0005200
0	2.3066997577765	0.265	0.058	0	1	Crsca08aG0159200
0	0.883897581805221	0.787	0.581	0	1	Crsca15aG0078600
0	2.48793514232582	0.272	0.066	0	1	Crsca06aG0192900
0	2.18358852115002	0.286	0.08	0	1	Crsca14aG0125400
0	1.59267136659017	0.862	0.656	0	1	Crsca15aG0003400
0	2.33845374052884	0.277	0.073	0	1	Crsca02aG0016500
0	1.7708553134976	0.286	0.087	0	1	Crsca03aG0244400
0	2.42062966417233	0.258	0.063	0	1	Crsca01aG0045900
0	1.79175080537813	0.294	0.099	0	1	Crsca01aG0084700
0	2.06442369022259	0.287	0.093	0	1	Crsca08aG0255600
0	2.25244971836353	0.267	0.074	0	1	Crsca04aG0052200
0	2.09171676699823	0.268	0.077	0	1	Crsca16aG0091600
0	2.19237248683743	0.257	0.07	0	1	Crsca16aG0209500
0	2.35989396139743	0.261	0.075	0	1	Crsca15aG0077300
0	2.09004317939287	0.256	0.072	0	1	Crsca01aG0264600
0	2.08468431631622	0.252	0.069	0	1	Crsca17aG0142100
0	1.90950880722987	0.258	0.079	0	1	Crsca04aG0269200
0	2.74055531822602	0.262	0.083	0	1	Crsca15aG0076800
0	0.868223000707671	0.838	0.665	0	1	Crsca17aG0138700
6.19558319884923e-321	1.55965832501945	0.363	0.149	2.89147867890294e-316	1	Crsca07aG0235000
2.29730644003263e-318	2.01757493244704	0.275	0.093	1.07215291556323e-313	1	Crsca17aG0151100
2.36388672646619e-318	1.36074359253662	0.502	0.263	1.10322593524177e-313	1	Crsca12aG0075600
1.65557435514922e-316	1.31058477251254	0.503	0.269	7.72656551548141e-312	1	Crsca01aG0027100
5.95738522263007e-313	2.26368091150854	0.255	0.083	2.78031168340145e-308	1	Crsca08aG0018300
4.17165989482135e-310	1.90948371788809	0.266	0.088	1.94691367291312e-305	1	Crsca04aG0220400
7.19078828405318e-301	1.47051550222227	0.44	0.219	3.35594089216762e-296	1	Crsca04aG0241300
2.29382168351004e-300	1.49403873960048	0.356	0.147	1.07052657969414e-295	1	Crsca05aG0191900
4.20956944607649e-300	1.28876548407553	0.522	0.297	1.9646060604839e-295	1	Crsca17aG0209000
3.91848533997951e-299	1.43949704063281	0.423	0.204	1.82875710816844e-294	1	Crsca15aG0136300
1.31161338768955e-298	1.52354015954934	0.362	0.152	6.12129968034714e-294	1	Crsca13aG0222700
1.46993922265858e-298	1.06708814316074	0.381	0.158	6.86020635214758e-294	1	Crsca11aG0212300
1.8441698241263e-295	1.63006363770927	0.313	0.121	8.60674056919744e-291	1	Crsca15aG0200600
1.29144675907145e-293	1.43130842207072	0.295	0.105	6.02718202458645e-289	1	Crsca06aG0081300
3.25800941781966e-292	1.69314	0.284	0.102	1.52051299529643e-287	1	Crsca17aG0065200
9.69289465717893e-292	1.58756176864328	0.331	0.135	4.52367393650541e-287	1	Crsca14aG0040500
1.37878832355706e-291	1.55426082134625	0.345	0.143	6.43480510604078e-287	1	Crsca12aG0165500
1.88078920242148e-287	1.25645028284531	0.439	0.215	8.77764320770103e-283	1	Crsca05aG0194300
2.14077287996542e-286	1.78678358734368	0.255	0.085	9.99098703079861e-282	1	Crsca02aG0208200
7.63165703946213e-284	1.71446942744673	0.328	0.136	3.56169434031698e-279	1	Crsca04aG0084800
2.94128169951447e-282	0.916589960839453	0.595	0.348	1.3726961691634e-277	1	Crsca17aG0250300
3.87452516273297e-282	1.8522494685738	0.263	0.092	1.80824089344748e-277	1	Crsca08aG0003400
2.09106387236146e-279	1.56955946494726	0.321	0.131	9.75899509231094e-275	1	Crsca02aG0313900
2.90386692407261e-273	1.07600937900421	0.382	0.164	1.35523469346469e-268	1	Crsca16aG0102300
1.02112917803437e-270	1.75678164716158	0.269	0.098	4.76560987388642e-266	1	Crsca14aG0214500
7.48575189488473e-268	1.52941807009706	0.324	0.134	3.4936004093427e-263	1	Crsca17aG0212900
3.36458584125797e-266	1.40387572425874	0.446	0.237	1.5702522121151e-261	1	Crsca10aG0133600
1.0129529778022e-265	1.20123644991744	0.393	0.181	4.72745154740288e-261	1	Crsca11aG0163600
1.19145968656393e-261	1.50453263929357	0.334	0.145	5.56054235719387e-257	1	Crsca15aG0017000
8.31192253763663e-261	1.43174834897406	0.31	0.126	3.87917424831502e-256	1	Crsca01aG0266600
5.24686054103179e-254	1.13817364058462	0.308	0.12	2.44870981449953e-249	1	Crsca10aG0133800
4.09709736870271e-251	1.14209758290984	0.548	0.341	1.91211534197356e-246	1	Crsca15aG0065100
7.07059775259579e-249	1.14055406040271	0.311	0.124	3.29984797113645e-244	1	Crsca07aG0032700
1.34628383372474e-248	1.38374557475753	0.345	0.156	6.28310665199337e-244	1	Crsca02aG0160000
1.46084473897703e-248	1.46386312100202	0.299	0.122	6.81776239680581e-244	1	Crsca16aG0224000
1.04773728842679e-246	1.52087096279552	0.274	0.106	4.88978992508782e-242	1	Crsca06aG0252500
3.82126426636307e-243	1.50242833899953	0.304	0.128	1.78338403311165e-238	1	Crsca05aG0060700
1.25752642044e-240	1.20404834942306	0.46	0.258	5.86887580419348e-236	1	Crsca06aG0199900
5.03152101773382e-237	1.25198911187431	0.26	0.095	2.34821085897637e-232	1	Crsca05aG0206900
1.39189255600929e-233	1.4751243977468	0.266	0.103	6.49596255889535e-229	1	Crsca07aG0069000
1.0155019333551e-232	1.58721589878422	0.254	0.097	4.73934752296827e-228	1	Crsca06aG0282900
1.30294693099962e-232	1.48834266805057	0.271	0.107	6.08085332697521e-228	1	Crsca15aG0003100
2.85716813637723e-232	1.57832288657314	0.28	0.115	1.33344036924726e-227	1	Crsca14aG0142300
2.78516347811585e-231	1.29360344301355	0.366	0.178	1.29983579523667e-226	1	Crsca02aG0111900
5.05799066693036e-230	0.991674203038748	0.504	0.281	2.3605642442564e-225	1	Crsca13aG0146000
3.86437438684587e-228	0.944032642991075	0.482	0.266	1.80350352634097e-223	1	Crsca10aG0034000
2.36960368240769e-227	0.95514711531452	0.428	0.22	1.10589403857967e-222	1	Crsca06aG0274700
2.99550798129635e-227	1.10200336371555	0.573	0.356	1.39800357487101e-222	1	Crsca03aG0108900
5.20249583818767e-227	1.32921644611828	0.264	0.101	2.42800480768219e-222	1	Crsca02aG0327700
3.35804619878217e-226	0.966193742069401	0.313	0.13	1.56720016097164e-221	1	Crsca17aG0024800
2.79949015125418e-218	0.934983388239877	0.472	0.261	1.30652205359033e-213	1	Crsca07aG0093000
1.68741781599099e-214	1.25866678566384	0.358	0.178	7.87517894722995e-210	1	Crsca05aG0102900
1.33402391604848e-211	0.941554099590309	0.508	0.303	6.22588961619826e-207	1	Crsca10aG0198900
2.88932467778509e-211	1.18750650978553	0.374	0.19	1.3484478271223e-206	1	Crsca04aG0211400
1.71568464984873e-210	1.06503824116508	0.373	0.184	8.00710026084402e-206	1	Crsca04aG0105800
1.11371886474589e-204	1.51753179698124	0.269	0.115	5.19772594176907e-200	1	Crsca17aG0246800
2.21622298666001e-204	1.08473154775865	0.355	0.172	1.03431126787423e-199	1	Crsca09aG0246500
8.63730138442221e-204	1.17958467421731	0.623	0.455	4.03102855610985e-199	1	Crsca06aG0184600
1.72323757596406e-202	1.29289931792412	0.262	0.108	8.04234976702427e-198	1	Crsca12aG0065000
2.80845341798662e-198	1.13853477591316	0.35	0.174	1.31070521017435e-193	1	Crsca17aG0232800
1.61213658700909e-194	1.23658590454161	0.477	0.3	7.52384145157141e-190	1	Crsca17aG0117600
2.45139254168897e-194	1.26001912387352	0.292	0.132	1.14406489920624e-189	1	Crsca11aG0025100
1.36199132108125e-191	1.25251127132895	0.326	0.16	6.35641349548621e-187	1	Crsca01aG0056500
1.8729032684015e-191	1.20380439272651	0.338	0.168	8.74083955362981e-187	1	Crsca09aG0276400
2.63645671392673e-185	1.20893158017171	0.355	0.189	1.2304343483896e-180	1	Crsca05aG0079600
2.2103842674915e-184	0.665156526223084	0.759	0.607	1.03158633763828e-179	1	Crsca16aG0143600
1.59521563581286e-181	1.26161107003971	0.29	0.136	7.44487137233864e-177	1	Crsca13aG0160800
1.68395299084299e-181	1.25317957623922	0.288	0.135	7.85900860826424e-177	1	Crsca01aG0128600
9.85487195068894e-180	0.586964321559252	0.58	0.367	4.59926873938653e-175	1	Crsca12aG0288800
1.2101696997232e-179	1.34452380404801	0.277	0.128	5.64786198860817e-175	1	Crsca07aG0200600
1.50641542583499e-176	1.37071451299442	0.262	0.118	7.03044079237189e-172	1	Crsca07aG0205400
2.99826455277204e-175	1.2847096671659	0.321	0.158	1.39929006677871e-170	1	Crsca04aG0284500
1.13385885267278e-174	2.0472416795461	0.251	0.117	5.29171926542384e-170	1	Crsca04aG0318600
2.83153986782767e-174	1.11333236075376	0.31	0.151	1.32147965631518e-169	1	Crsca14aG0190000
5.22173873445705e-173	1.21126178927913	0.274	0.127	2.4369854673711e-168	1	Crsca04aG0029900
2.57125676533421e-172	1.04391187577597	0.383	0.212	1.20000553238148e-167	1	Crsca09aG0064400
6.94619589206146e-172	0.887875404824467	0.446	0.265	3.24178962282508e-167	1	Crsca03aG0300300
1.40725031975586e-170	1.16680691020295	0.257	0.114	6.56763724230062e-166	1	Crsca11aG0029100
2.4360090777634e-164	1.30531990262817	0.315	0.163	1.13688543659218e-159	1	Crsca06aG0245400
1.05390718380602e-162	1.20752686594899	0.289	0.143	4.9185848268227e-158	1	Crsca02aG0232800
1.58007135826241e-161	0.653922887073693	0.602	0.416	7.37419302901065e-157	1	Crsca07aG0182000
8.99747687445981e-161	1.0941024979671	0.304	0.152	4.19912245731039e-156	1	Crsca16aG0054900
1.71256109606726e-159	0.857069688675532	0.585	0.412	7.9925226353459e-155	1	Crsca16aG0075100
3.31007554415156e-158	1.06460434887326	0.408	0.245	1.54481225645554e-153	1	Crsca06aG0175600
1.64941580932421e-157	0.879757950685949	0.283	0.133	7.69782358211608e-153	1	Crsca12aG0130400
6.3252477206257e-155	0.926775059162005	0.429	0.261	2.95199311121602e-150	1	Crsca03aG0160900
1.47417972759748e-154	1.05789857416471	0.404	0.239	6.87999678869742e-150	1	Crsca06aG0197000
3.65043566519404e-153	0.492678333073503	0.466	0.265	1.70365832494606e-148	1	Crsca05aG0162700
5.78506737760876e-148	0.903975963044091	0.401	0.235	2.69989094513001e-143	1	Crsca04aG0069000
6.45671677283211e-148	1.12967252820329	0.252	0.118	3.01334971788074e-143	1	Crsca16aG0098000
9.79500257420424e-147	1.03343787727559	0.287	0.144	4.57132770138112e-142	1	Crsca07aG0167900
1.35313871082004e-146	1.11578996152306	0.303	0.158	6.31509836339712e-142	1	Crsca09aG0050200
6.48700525515583e-146	0.78631821450394	0.568	0.402	3.02748535258122e-141	1	Crsca16aG0154100
1.6143334744029e-144	0.941427698968388	0.357	0.201	7.53409432503834e-140	1	Crsca12aG0211000
3.6480355898131e-144	0.786086477823388	0.58	0.418	1.70253820976577e-139	1	Crsca17aG0231400
6.56388595582611e-142	1.02350144665155	0.265	0.129	3.06336557558405e-137	1	Crsca03aG0278200
6.96814096874294e-140	1.16624751030859	0.284	0.147	3.25203139011233e-135	1	Crsca12aG0134500
2.27029569568885e-139	1.25059158841568	0.421	0.27	1.05954700117799e-134	1	Crsca02aG0128300
3.82346886617234e-138	0.818802382569424	0.457	0.296	1.78441291984263e-133	1	Crsca08aG0015300
3.55287975396761e-135	0.965600368010066	0.313	0.169	1.65812898117668e-130	1	Crsca13aG0155500
2.0122465654261e-130	0.858669797364088	0.272	0.136	9.39115472084359e-126	1	Crsca01aG0103400
2.25068834545657e-130	0.836003307119388	0.47	0.309	1.05039625082458e-125	1	Crsca05aG0195100
2.64758524042321e-130	1.07357863166332	0.275	0.142	1.23562803170551e-125	1	Crsca03aG0158400
5.06539485123463e-130	0.67853205356303	0.42	0.257	2.3640197770712e-125	1	Crsca13aG0240600
5.41518403556195e-130	0.5613880274584	0.455	0.28	2.52726638939676e-125	1	Crsca11aG0207500
5.45056426740617e-129	0.921490932629969	0.371	0.221	2.54377834359846e-124	1	Crsca15aG0157300
4.98084578861725e-128	1.10681705096578	0.256	0.131	2.32456072954767e-123	1	Crsca10aG0082300
2.4542770709265e-127	0.807133130642971	0.446	0.29	1.1454111090014e-122	1	Crsca08aG0025900
1.28960257722002e-126	1.05971194372234	0.271	0.14	6.01857522788585e-122	1	Crsca15aG0017500
2.54711768601291e-125	0.974609282967623	0.281	0.148	1.18873982406223e-120	1	Crsca07aG0063300
3.49608326702833e-123	0.817725977168731	0.435	0.283	1.63162206072212e-118	1	Crsca17aG0174000
5.68068873387719e-123	0.993607759461546	0.328	0.191	2.65117743210048e-118	1	Crsca14aG0226000
3.13429685440261e-122	0.742080787382505	0.323	0.178	1.4627763419497e-117	1	Crsca15aG0237500
7.85728406113351e-120	0.704246092496587	0.514	0.357	3.66699447133101e-115	1	Crsca09aG0133400
5.09844824353764e-118	0.958975874299032	0.479	0.34	2.37944579525902e-113	1	Crsca07aG0146000
2.8018083859074e-117	1.00793352015393	0.277	0.15	1.30760397370298e-112	1	Crsca11aG0041200
1.03216135356435e-116	0.93167554451669	0.306	0.173	4.81709703708481e-112	1	Crsca04aG0152000
5.22864455957623e-116	1.00639259705078	0.271	0.147	2.44020841595422e-111	1	Crsca12aG0189200
9.89782747406045e-115	0.967808700444042	0.354	0.218	4.61931608214401e-110	1	Crsca14aG0085100
4.13834553682989e-114	1.08214024905268	0.293	0.167	1.93136586203851e-109	1	Crsca15aG0110100
4.60973151538258e-114	1.09073503933175	0.263	0.141	2.15136169822905e-109	1	Crsca02aG0158000
3.19182154840302e-113	0.991126423536215	0.261	0.139	1.48962311663969e-108	1	Crsca17aG0172500
2.41364669648098e-112	0.582892117344514	0.584	0.433	1.12644891324767e-107	1	Crsca07aG0124300
2.07085205065095e-110	0.863787282619246	0.331	0.198	9.66466652038797e-106	1	Crsca16aG0221500
2.76155387637237e-109	0.675909097683723	0.42	0.268	1.28881719410298e-104	1	Crsca09aG0209200
1.66340240859033e-108	1.12757937956838	0.268	0.15	7.76309904089107e-104	1	Crsca05aG0169200
5.65448369953067e-108	0.99584690079931	0.263	0.144	2.63894754257096e-103	1	Crsca09aG0143300
3.8524670166246e-107	0.672388837631241	0.367	0.224	1.7979463566587e-102	1	Crsca15aG0084900
4.72265351408612e-107	0.911717329861107	0.297	0.173	2.20406239502399e-102	1	Crsca04aG0195100
1.42787586458472e-106	0.869799288791954	0.282	0.158	6.66389666001691e-102	1	Crsca01aG0135200
1.95203349018886e-106	0.622947959517085	0.361	0.215	9.11014029871141e-102	1	Crsca01aG0027500
5.22405503465657e-106	1.00352293864646	0.269	0.15	2.43806648467422e-101	1	Crsca03aG0175300
3.7490747514999e-105	0.490650630069674	0.598	0.451	1.749693186525e-100	1	Crsca05aG0189500
4.16502686310745e-105	0.884450265841158	0.426	0.294	1.94381803701225e-100	1	Crsca12aG0115800
5.82983056454631e-104	0.791828353089838	0.369	0.234	2.72078192447376e-99	1	Crsca08aG0229800
1.4926154625558e-103	0.313829505813194	0.403	0.253	6.96603636374794e-99	1	Crsca13aG0228800
2.32225769982061e-103	0.813736149333948	0.271	0.149	1.08379766850628e-98	1	Crsca06aG0117500
1.76594922532321e-102	1.00840412415743	0.311	0.189	8.24168503458341e-98	1	Crsca16aG0160000
7.93367404751271e-101	0.84786282468377	0.328	0.203	3.70264567797418e-96	1	Crsca01aG0225100
1.08101247470844e-100	0.567147749751608	0.424	0.278	5.04508521946427e-96	1	Crsca02aG0209300
2.8594537896101e-100	0.36613219001991	0.641	0.496	1.33450708361103e-95	1	Crsca04aG0140400
8.67677326701153e-100	0.600837499836281	0.334	0.2	4.04945008371428e-95	1	Crsca12aG0054500
1.3175195995788e-98	0.362337937692395	0.719	0.596	6.14886397123428e-94	1	Crsca01aG0291400
3.99425184992349e-98	0.944529361290261	0.276	0.159	1.86411733835929e-93	1	Crsca13aG0192300
2.07860004764698e-97	0.610432970574827	0.525	0.389	9.70082642236844e-93	1	Crsca02aG0043100
6.14584261916659e-97	1.05803246358632	0.259	0.148	2.86826475036505e-92	1	Crsca07aG0224700
2.53307513625747e-96	0.609753080507951	0.575	0.444	1.18218616609136e-91	1	Crsca01aG0034800
1.17846396787108e-95	0.672019787243636	0.399	0.263	5.49989133805435e-91	1	Crsca17aG0121900
1.52869643062104e-94	0.841844470460163	0.332	0.209	7.13442624170839e-90	1	Crsca03aG0132500
3.79268766225047e-93	0.841310104391656	0.353	0.227	1.7700473319723e-88	1	Crsca14aG0073300
1.97061922098303e-91	0.754165108399134	0.334	0.209	9.19687990432781e-87	1	Crsca11aG0062300
8.59198895349018e-91	0.566784293183412	0.404	0.264	4.00988124459387e-86	1	Crsca02aG0277500
1.16322028675889e-90	0.678260436093221	0.3	0.178	5.42874907830374e-86	1	Crsca05aG0158500
5.78237320666514e-88	0.443474583634673	0.754	0.641	2.69863357555062e-83	1	Crsca09aG0206400
8.31385758384559e-88	0.787847577508636	0.334	0.214	3.88007733438074e-83	1	Crsca02aG0005200
4.17560809645728e-87	0.765803076055235	0.335	0.213	1.94875629861661e-82	1	Crsca07aG0189000
5.16896121041665e-87	0.611528296978124	0.337	0.211	2.41235419690145e-82	1	Crsca12aG0087300
1.15542469331874e-86	0.656402687742615	0.6	0.482	5.39236704371855e-82	1	Crsca04aG0333700
1.21919294574351e-86	0.84069680305183	0.252	0.145	5.68997347778494e-82	1	Crsca01aG0091600
3.5599511342977e-85	0.751612326617431	0.351	0.23	1.66142919437673e-80	1	Crsca02aG0250600
4.4372247219756e-85	0.635641940781134	0.437	0.309	2.07085277774601e-80	1	Crsca11aG0083600
2.15325442402105e-84	0.856688876069672	0.269	0.161	1.00492383969062e-79	1	Crsca07aG0130900
3.74079444400092e-83	0.703852924685962	0.319	0.201	1.74582876701523e-78	1	Crsca10aG0231200
9.73730571038162e-83	0.517610163529468	0.423	0.285	4.5444005750351e-78	1	Crsca06aG0059100
1.09278341332614e-82	0.58225815991534	0.528	0.402	5.1000201899931e-78	1	Crsca11aG0216700
1.21768714614008e-82	0.440595970505989	0.622	0.492	5.68294591103576e-78	1	Crsca06aG0124400
1.26331492289215e-82	0.682507107039378	0.347	0.226	5.89589074513767e-78	1	Crsca04aG0062100
6.02480016267471e-82	0.694557681239074	0.307	0.191	2.81177423592029e-77	1	Crsca01aG0036900
1.2007703681097e-81	0.327029582981754	0.678	0.542	5.60399530796796e-77	1	Crsca06aG0229000
1.68310388082821e-81	0.584765288234446	0.526	0.4	7.85504581182525e-77	1	Crsca03aG0148500
1.80305710180315e-81	0.515921277613029	0.537	0.408	8.41486749411531e-77	1	Crsca16aG0175100
2.29548789041179e-81	0.313891342653703	0.398	0.26	1.07130419845518e-76	1	Crsca01aG0155400
3.46560322267853e-81	0.502948607284693	0.6	0.47	1.61739702402407e-76	1	Crsca12aG0075800
9.22767962515762e-80	0.678565259138174	0.31	0.194	4.30655808106106e-75	1	Crsca06aG0121900
7.56002719864328e-79	0.609612576337304	0.412	0.287	3.52826469360682e-74	1	Crsca06aG0135500
1.31015878019498e-78	0.671224928081428	0.38	0.26	6.11451102716997e-74	1	Crsca14aG0199100
5.34551389992098e-78	0.654528444013933	0.352	0.233	2.49475133709312e-73	1	Crsca11aG0048000
1.89064535876742e-77	0.871853164201123	0.383	0.269	8.82364188936753e-73	1	Crsca14aG0226600
2.63785297117081e-77	0.706985932502074	0.309	0.197	1.23108598164542e-72	1	Crsca10aG0239400
3.61596198024881e-77	0.559313175811804	0.364	0.24	1.68756945618212e-72	1	Crsca08aG0008900
5.27920911223004e-77	0.773515855589707	0.315	0.205	2.46380689267776e-72	1	Crsca04aG0057800
6.43427169466382e-77	0.275817455101654	0.684	0.565	3.0028745998996e-72	1	Crsca09aG0160600
1.01452189643731e-74	0.527888249836606	0.34	0.221	4.73477369067292e-70	1	Crsca06aG0191900
2.39340525965288e-72	0.762999890043644	0.264	0.163	1.11700223468e-67	1	Crsca03aG0126900
1.72923841999491e-70	0.383706439026904	0.561	0.437	8.07035570611625e-66	1	Crsca10aG0015600
1.87410856044836e-70	0.646008460056063	0.269	0.166	8.7464646516125e-66	1	Crsca08aG0054500
2.80419167635221e-69	0.529193303341325	0.506	0.389	1.30871625535358e-64	1	Crsca01aG0226400
2.97165880424432e-69	1.00778978860384	0.271	0.176	1.38687316394082e-64	1	Crsca11aG0261200
6.67720371562726e-69	0.63706148431979	0.269	0.166	3.11625097408324e-64	1	Crsca13aG0250000
3.51958493893408e-68	0.698762375136735	0.265	0.165	1.64259029100053e-63	1	Crsca14aG0098500
8.30163593340967e-68	0.696239233531083	0.337	0.231	3.87437349012229e-63	1	Crsca08aG0038700
2.989962263988e-67	0.693274315215676	0.274	0.173	1.3954153886032e-62	1	Crsca12aG0160400
9.74437753284685e-67	0.309138669724297	0.609	0.492	4.54770099457962e-62	1	Crsca01aG0304700
7.14414559292863e-66	0.691332175867272	0.337	0.234	3.33417274821979e-61	1	Crsca06aG0138100
9.54218761627178e-65	0.441715641808566	0.485	0.362	4.45333896051404e-60	1	Crsca12aG0257800
2.93039382173406e-64	0.721767139611484	0.405	0.295	1.36761479660329e-59	1	Crsca06aG0141200
7.23589251021593e-64	0.331916677837132	0.443	0.312	3.37699103451777e-59	1	Crsca17aG0201000
8.92194733476123e-64	0.688745870231035	0.279	0.18	4.16387282113307e-59	1	Crsca01aG0005300
8.0877569402894e-62	0.636392354463731	0.275	0.178	3.77455616403306e-57	1	Crsca08aG0103100
1.0480682357131e-60	0.5065782271719	0.267	0.169	4.89133445607303e-56	1	Crsca09aG0258200
2.28628901651892e-59	0.808368225491183	0.257	0.167	1.06701108400938e-54	1	Crsca08aG0262700
2.36140233919352e-58	0.739771385038696	0.271	0.18	1.10206647170162e-53	1	Crsca10aG0065000
6.7499247516389e-58	0.778176113903138	0.257	0.169	3.15018988158988e-53	1	Crsca02aG0030500
3.01771439657071e-57	0.387484416060595	0.427	0.313	1.40836730887955e-52	1	Crsca03aG0076000
9.20384505330266e-56	0.59045819413062	0.338	0.24	4.29543448637635e-51	1	Crsca16aG0174500
1.37909198438999e-55	0.516907572764282	0.335	0.233	6.43622229114809e-51	1	Crsca14aG0213400
4.20838363017644e-55	0.614450402343741	0.25	0.162	1.96405264020334e-50	1	Crsca04aG0206700
8.83836558637822e-55	0.521433160986975	0.354	0.251	4.12486521916272e-50	1	Crsca12aG0151800
2.09401008103093e-54	0.619407496729854	0.257	0.168	9.77274504817133e-50	1	Crsca05aG0032600
3.66869906298496e-54	0.514955196561011	0.346	0.243	1.71218185269508e-49	1	Crsca03aG0151500
7.52759781199162e-54	0.597774118241484	0.301	0.209	3.51312989885649e-49	1	Crsca10aG0197800
2.06566494835518e-53	0.543729855377597	0.305	0.209	9.64045831397363e-49	1	Crsca14aG0106200
2.98810342864056e-52	0.499443786677812	0.258	0.167	1.39454787014655e-47	1	Crsca14aG0193900
3.40970232607355e-52	0.395510885416174	0.557	0.45	1.59130807557853e-47	1	Crsca01aG0235200
5.19569226573555e-52	0.491164557866934	0.323	0.226	2.42482958041878e-47	1	Crsca11aG0027800
1.028700795354e-51	0.438171126911746	0.261	0.168	4.8009466119171e-47	1	Crsca02aG0336100
1.69255541952441e-51	0.511027037357856	0.254	0.165	7.89915614292042e-47	1	Crsca16aG0207800
1.86226086991356e-51	0.435972589144829	0.402	0.295	8.69117147988657e-47	1	Crsca02aG0190400
7.08515955070331e-51	0.494568669776097	0.364	0.266	3.30664396231323e-46	1	Crsca09aG0062300
1.97138257133433e-50	0.591581973864111	0.305	0.215	9.20044246041733e-46	1	Crsca14aG0112400
2.54325719425116e-50	0.427461525431466	0.463	0.357	1.18693813255702e-45	1	Crsca12aG0028900
2.66436751502106e-50	0.513011944949683	0.321	0.227	1.24346031926033e-45	1	Crsca12aG0009500
1.69097393980763e-49	0.620528544128531	0.251	0.167	7.89177537708219e-45	1	Crsca16aG0160200
1.63245349902431e-48	0.633952735368702	0.268	0.184	7.61866047994646e-44	1	Crsca02aG0288700
1.99199022675424e-48	0.500637988090767	0.388	0.292	9.29661838826202e-44	1	Crsca04aG0202200
5.25222346299234e-48	0.572095281477143	0.277	0.191	2.45121269017853e-43	1	Crsca11aG0044400
8.33396953329582e-48	0.473626544296659	0.375	0.279	3.88946358118916e-43	1	Crsca10aG0240800
7.91654704244117e-47	0.59119194491918	0.297	0.208	3.6946525047073e-42	1	Crsca14aG0219100
4.7234360856851e-46	0.63946746874291	0.342	0.256	2.20442762118924e-41	1	Crsca04aG0058100
6.8416333389542e-45	0.295652796994135	0.401	0.29	3.19299027928993e-40	1	Crsca03aG0192000
1.47102798152004e-44	0.507843822223452	0.395	0.306	6.86528758975403e-40	1	Crsca17aG0084000
4.26685498406043e-44	0.328141965204348	0.553	0.457	1.991341221061e-39	1	Crsca02aG0128700
8.22895586301117e-43	0.566467234009249	0.307	0.222	3.84045370126731e-38	1	Crsca13aG0112100
1.13038837905213e-42	0.988993741873224	0.296	0.223	5.27552256503629e-38	1	Crsca09aG0066300
2.217806741154e-42	0.337035086404598	0.54	0.45	1.03505040609657e-37	1	Crsca04aG0281900
9.01324373853038e-42	0.538230026112375	0.268	0.189	4.20648085277213e-37	1	Crsca14aG0119500
1.32741656117411e-40	0.430689766472925	0.291	0.207	6.19505309099955e-36	1	Crsca05aG0181400
4.49520555630959e-40	0.556596350620839	0.355	0.272	2.09791243312969e-35	1	Crsca06aG0147300
1.1224354957503e-39	0.436995290307212	0.367	0.28	5.23840645866665e-35	1	Crsca01aG0225300
6.27393286585186e-39	0.344640223499681	0.294	0.212	2.92804446849306e-34	1	Crsca13aG0060000
7.00759921927499e-39	0.568343363716286	0.27	0.193	3.27044655563564e-34	1	Crsca06aG0248200
1.54048507541499e-38	0.51252076865081	0.349	0.269	7.18944384696174e-34	1	Crsca12aG0137200
1.86321046113559e-38	0.489903946949508	0.297	0.216	8.69560322211979e-34	1	Crsca15aG0182600
3.77477776492191e-38	0.368205605258009	0.281	0.197	1.76168878288905e-33	1	Crsca03aG0327800
4.20220841686892e-38	0.510882165517372	0.286	0.207	1.96117066815273e-33	1	Crsca10aG0149900
5.13018231002422e-38	0.55097564669391	0.318	0.239	2.3942560840883e-33	1	Crsca01aG0275100
4.78548137599631e-37	0.415028968700644	0.413	0.328	2.23338415817748e-32	1	Crsca03aG0171000
2.90128502398138e-36	0.50924050520049	0.288	0.21	1.35402972069211e-31	1	Crsca02aG0210200
3.14096182023142e-36	0.501977719134054	0.275	0.201	1.465886881502e-31	1	Crsca15aG0206400
5.0187745985759e-36	0.424645304890848	0.309	0.229	2.34226210515537e-31	1	Crsca01aG0090600
1.76990988162537e-35	0.517414102558714	0.304	0.228	8.26016941754559e-31	1	Crsca04aG0226000
1.15338823824682e-34	0.426189374412496	0.263	0.188	5.38286290789792e-30	1	Crsca11aG0193500
1.18774353636518e-34	0.288995089963247	0.408	0.32	5.54319908421628e-30	1	Crsca10aG0195200
2.86418688115134e-34	0.256826296680367	0.273	0.196	1.33671601743333e-29	1	Crsca11aG0179800
4.85062328282756e-34	0.520659278238307	0.34	0.267	2.26378588609562e-29	1	Crsca11aG0133300
4.96759852803894e-34	0.467929089359787	0.254	0.182	2.31837823303577e-29	1	Crsca15aG0130600
3.89887254491291e-33	0.428979178089911	0.326	0.249	1.81960381671086e-28	1	Crsca07aG0202000
6.23163954281673e-33	0.534927321093607	0.3	0.23	2.90830617463257e-28	1	Crsca10aG0065700
1.61504207559558e-32	0.518660006944005	0.254	0.186	7.53740136680457e-28	1	Crsca07aG0041100
1.5580363122009e-31	0.271372130716579	0.447	0.365	7.2713554690416e-27	1	Crsca06aG0198300
9.52298943467542e-31	0.291026017750917	0.383	0.3	4.44437916916302e-26	1	Crsca01aG0095300
3.45571475585783e-30	0.399323565967957	0.377	0.302	1.61278207655885e-25	1	Crsca06aG0164400
2.29152767873991e-29	0.42655250788765	0.319	0.248	1.06945596766791e-24	1	Crsca02aG0065800
2.41644603015278e-29	0.284598874575617	0.469	0.389	1.1277553622723e-24	1	Crsca15aG0096300
3.42035157684844e-29	0.366394561712647	0.342	0.267	1.59627808091517e-24	1	Crsca12aG0192700
4.76930208793986e-29	0.481086041104756	0.254	0.19	2.22583328444153e-24	1	Crsca16aG0059800
5.19279335987785e-29	0.405751196786263	0.266	0.199	2.42347666105499e-24	1	Crsca01aG0048300
1.4922021833113e-28	0.370826671461172	0.331	0.256	6.96410758951385e-24	1	Crsca02aG0001400
5.39679978958984e-28	0.411126300173021	0.341	0.272	2.51868646180158e-23	1	Crsca17aG0197900
5.5550682730249e-28	0.394670696257684	0.27	0.202	2.59255036302072e-23	1	Crsca16aG0090200
2.99597341845361e-27	0.47951546366259	0.25	0.187	1.3982207943923e-22	1	Crsca04aG0181000
3.57697214374191e-27	0.313373889356111	0.452	0.378	1.66937289948435e-22	1	Crsca13aG0186600
1.78164197599349e-26	0.300216575289928	0.351	0.277	8.31492310196162e-22	1	Crsca17aG0134900
1.94038198455451e-26	0.25662119603984	0.411	0.337	9.05576272191591e-22	1	Crsca13aG0084100
1.51500438686948e-25	0.334827795821972	0.316	0.246	7.07052547351987e-21	1	Crsca04aG0237500
2.2881996945612e-25	0.555080713523494	0.292	0.231	1.06790279745171e-20	1	Crsca01aG0029600
6.56959860416771e-25	0.393726621671925	0.323	0.257	3.06603166856507e-20	1	Crsca04aG0049000
2.97387866547758e-24	0.442543950799624	0.32	0.258	1.38790917317839e-19	1	Crsca12aG0151400
3.72495828911065e-24	0.292111889702742	0.506	0.437	1.73843803352794e-19	1	Crsca11aG0094900
3.93994085513764e-24	0.333084881667129	0.268	0.204	1.83877039709273e-19	1	Crsca09aG0274800
3.34971813074602e-23	0.330538206306712	0.323	0.258	1.56331345161917e-18	1	Crsca12aG0239400
3.21607381793549e-22	0.295315321480775	0.42	0.353	1.50094165083049e-17	1	Crsca02aG0230400
6.09140296696604e-22	0.433566078592131	0.315	0.258	2.84285776468305e-17	1	Crsca04aG0191800
2.34803938073145e-20	0.309872981034796	0.396	0.334	1.09582997898737e-15	1	Crsca11aG0045800
7.85544421211201e-20	0.261281527203436	0.304	0.242	3.66613581379268e-15	1	Crsca17aG0251200
9.4972060863814e-20	0.252366604891499	0.317	0.256	4.4323460805142e-15	1	Crsca12aG0236000
2.86576641562149e-18	0.337177272984727	0.278	0.224	1.33745318617055e-13	1	Crsca12aG0287600
8.49830641427786e-17	0.330206779836226	0.309	0.256	3.96615960354348e-12	1	Crsca01aG0290900
2.80509535869261e-16	0.307619957825349	0.36	0.305	1.30913800390184e-11	1	Crsca16aG0042100
3.04039089303987e-16	0.31733477889797	0.297	0.246	1.41895042978171e-11	1	Crsca06aG0109600
3.25513167500617e-16	0.294080214419396	0.324	0.271	1.51916995272538e-11	1	Crsca15aG0136400
3.91061995600209e-16	0.284387305181351	0.252	0.202	1.82508633346617e-11	1	Crsca02aG0013100
2.16391893885633e-15	0.302809588731138	0.261	0.212	1.00990096876425e-10	1	Crsca09aG0238900
9.01781040157587e-15	0.322655031570665	0.279	0.232	4.20861211441546e-10	1	Crsca17aG0129200
1.14966982361367e-14	0.331694202647402	0.269	0.223	5.36550906680501e-10	1	Crsca17aG0018000
2.28298092020672e-14	0.270548231986891	0.326	0.274	1.06546719546048e-09	1	Crsca08aG0057800
2.7752878063091e-14	0.25122296461865	0.348	0.298	1.29522681920446e-09	1	Crsca12aG0130500
4.77360622631243e-14	0.253535850873341	0.292	0.242	2.22784202582001e-09	1	Crsca05aG0133600
3.2131811331313e-12	0.289356073796691	0.276	0.233	1.49959163483238e-07	1	Crsca17aG0248800
3.89401785600176e-08	0.258944317565091	0.293	0.26	0.00181733813339602	1	Crsca04aG0009500
0	3.11262299994737	0.794	0.393	0	2	Crsca04aG0246900
0	1.34670250375018	0.824	0.452	0	2	Crsca04aG0002300
0	1.01321505847118	0.812	0.459	0	2	Crsca12aG0024400
0	2.14284992825307	0.547	0.196	0	2	Crsca12aG0156400
0	2.60213459023278	0.496	0.146	0	2	Crsca03aG0217300
0	1.85513697790745	0.651	0.302	0	2	Crsca12aG0163100
0	2.4749475059971	0.548	0.204	0	2	Crsca06aG0186700
0	2.66828636741939	0.427	0.088	0	2	Crsca02aG0218800
0	1.63402335803012	0.611	0.275	0	2	Crsca07aG0050800
0	1.70942306253544	0.604	0.275	0	2	Crsca02aG0190400
0	1.37509904597337	0.604	0.281	0	2	Crsca13aG0146000
0	1.20787356119189	0.687	0.37	0	2	Crsca15aG0033100
0	1.99646985585463	0.468	0.152	0	2	Crsca09aG0195700
0	1.78628572017606	0.667	0.353	0	2	Crsca17aG0250300
0	2.04421409015885	0.509	0.198	0	2	Crsca06aG0141300
0	2.27862862226818	0.411	0.111	0	2	Crsca07aG0013600
0	2.48749233916129	0.377	0.081	0	2	Crsca17aG0135400
0	3.96463693737292	0.336	0.045	0	2	Crsca06aG0057100
0	1.50567341015596	0.516	0.227	0	2	Crsca03aG0151500
0	1.84553081133068	0.512	0.225	0	2	Crsca07aG0130200
0	2.89615815093525	0.406	0.12	0	2	Crsca01aG0034900
0	1.50653087939364	0.893	0.607	0	2	Crsca07aG0130000
0	1.65980780847127	0.518	0.234	0	2	Crsca16aG0192200
0	1.53006889757507	0.488	0.208	0	2	Crsca09aG0064400
0	3.15724761478354	0.349	0.069	0	2	Crsca06aG0129400
0	2.03373419511653	0.419	0.141	0	2	Crsca08aG0101100
0	1.36851795070883	0.624	0.348	0	2	Crsca04aG0015500
0	2.68931298505993	0.371	0.095	0	2	Crsca14aG0209100
0	1.8146799165869	0.523	0.252	0	2	Crsca01aG0155400
0	2.56485765244476	0.359	0.091	0	2	Crsca06aG0267600
0	3.39733041525561	0.324	0.059	0	2	Crsca10aG0144500
0	2.14373390871852	0.407	0.144	0	2	Crsca04aG0015000
0	2.82659888684291	0.308	0.051	0	2	Crsca14aG0046400
0	2.3075814880437	0.344	0.09	0	2	Crsca07aG0167000
0	2.38563155090748	0.375	0.122	0	2	Crsca02aG0182900
0	1.71234429549959	0.721	0.473	0	2	Crsca04aG0333700
0	2.39848315679431	0.326	0.079	0	2	Crsca13aG0048700
0	2.7508622540932	0.308	0.062	0	2	Crsca07aG0225700
0	2.66097524816416	0.313	0.068	0	2	Crsca06aG0097500
0	2.38944369579611	0.322	0.083	0	2	Crsca06aG0262100
0	2.3965124960564	0.389	0.152	0	2	Crsca17aG0197700
0	3.14194436302772	0.307	0.071	0	2	Crsca12aG0101600
0	3.03288664754364	0.312	0.078	0	2	Crsca14aG0118800
0	1.52604733182261	0.89	0.664	0	2	Crsca15aG0003400
0	2.66621462947185	0.273	0.062	0	2	Crsca06aG0142000
0	2.37846349551696	0.292	0.083	0	2	Crsca06aG0048000
0	3.16197091356496	0.253	0.046	0	2	Crsca05aG0139100
0	2.06854752080919	0.276	0.073	0	2	Crsca05aG0038000
0	2.24221106378939	0.27	0.068	0	2	Crsca14aG0204600
3.13731685109192e-320	1.61002419136294	0.732	0.503	1.4641857744046e-315	2	Crsca14aG0212300
4.52346742706412e-319	1.28270737696936	0.899	0.761	2.11110224821082e-314	2	Crsca01aG0050600
3.14510332567037e-316	2.17838054916939	0.324	0.109	1.46781972209036e-311	2	Crsca01aG0102700
1.30437023346352e-314	1.67118561258265	0.485	0.226	6.08749587957426e-310	2	Crsca03aG0114200
5.79299899409593e-312	1.97144252558669	0.299	0.092	2.70359263054457e-307	2	Crsca04aG0068700
2.64408357273002e-311	2.34896843382052	0.265	0.076	1.2339938033931e-306	2	Crsca10aG0208000
2.66568258565683e-311	3.05927014440106	0.275	0.083	1.24407406272604e-306	2	Crsca12aG0211400
2.47192142672499e-310	1.31311408215149	0.6	0.318	1.15364572985255e-305	2	Crsca02aG0139700
3.34087009796435e-304	2.21557459180394	0.265	0.076	1.55918407471996e-299	2	Crsca16aG0233200
2.44430801970627e-302	0.745288111241818	0.788	0.493	1.14075855279692e-297	2	Crsca11aG0259500
4.22080800814471e-299	1.84816859081651	0.282	0.084	1.96985109740114e-294	2	Crsca04aG0194500
7.74938673592794e-298	1.90005627983034	0.504	0.249	3.61663878965757e-293	2	Crsca13aG0228800
1.65294121405478e-287	1.27903564104617	0.528	0.258	7.71427664599366e-283	2	Crsca12aG0084600
1.74968884307289e-285	1.12332229854764	0.624	0.346	8.16579783062119e-281	2	Crsca01aG0244300
5.3271060945631e-284	2.15796544634701	0.265	0.081	2.4861604143326e-279	2	Crsca04aG0131400
4.65281264174564e-279	2.97141150434832	0.309	0.111	2.17146765990269e-274	2	Crsca01aG0005500
8.80558333840726e-273	1.0879652947063	0.67	0.398	4.10956574403467e-268	2	Crsca11aG0121900
1.83417348403706e-270	1.44999777083327	0.484	0.234	8.56008765000095e-266	2	Crsca04aG0069000
3.27492520604537e-270	1.70405097366246	0.54	0.305	1.52840759366138e-265	2	Crsca03aG0076000
3.73730329468717e-270	0.931848884161659	0.636	0.346	1.7441994476305e-265	2	Crsca03aG0331200
8.90969943258946e-269	1.88114813937627	0.253	0.075	4.1581567251895e-264	2	Crsca12aG0077500
7.52396359618949e-265	1.93511358320042	0.281	0.092	3.51143381034164e-260	2	Crsca17aG0003900
2.33771776189035e-261	1.77820859485699	0.338	0.13	1.09101287947423e-256	2	Crsca05aG0156000
8.32561494532545e-261	1.42137520451254	0.447	0.205	3.88556449498339e-256	2	Crsca07aG0189000
9.35243567373551e-260	1.94688439770686	0.567	0.331	4.36478172893236e-255	2	Crsca11aG0130300
1.81106125762566e-257	1.48297479149726	0.342	0.133	8.45222288933894e-253	2	Crsca07aG0240900
3.0392035785273e-256	0.669118866780867	0.796	0.539	1.41839631009869e-251	2	Crsca04aG0318700
3.49565803444555e-250	1.67481114301737	0.317	0.117	1.63142360467574e-245	2	Crsca06aG0141700
3.35956863897559e-248	1.64367998435422	0.336	0.13	1.56791068380991e-243	2	Crsca06aG0164300
4.35153872826164e-247	1.60113228166927	0.286	0.097	2.03086312447971e-242	2	Crsca03aG0311800
1.82490188399863e-246	1.77616567986912	0.311	0.115	8.51681709262161e-242	2	Crsca11aG0029100
1.50394733615247e-242	1.29140363410656	0.389	0.163	7.01892221782357e-238	2	Crsca13aG0238100
1.70742623003371e-239	1.07425786454691	0.565	0.308	7.96855821556733e-235	2	Crsca10aG0173000
5.52884444147308e-235	1.57617196299773	0.417	0.199	2.58031170083548e-230	2	Crsca05aG0027700
7.7262276043945e-233	1.81752930961274	0.264	0.09	3.60583042297091e-228	2	Crsca17aG0111600
5.19849913167288e-224	1.45894321064548	0.369	0.158	2.42613954475173e-219	2	Crsca05aG0191900
4.03349875238233e-222	0.898519227327026	0.723	0.489	1.88243386773683e-217	2	Crsca14aG0012400
5.64351417801641e-222	0.969045561237539	0.626	0.388	2.63382806688026e-217	2	Crsca04aG0143400
5.93589385968624e-214	1.12254197674203	0.516	0.279	2.77028166431557e-209	2	Crsca08aG0096800
3.10005027795594e-211	1.73027227243477	0.326	0.139	1.44679346472204e-206	2	Crsca01aG0128600
1.31739289413292e-210	0.868052585316617	0.836	0.675	6.14827263691832e-206	2	Crsca17aG0138700
9.90958708397906e-209	0.751783846007998	0.583	0.323	4.62480429209303e-204	2	Crsca13aG0119300
7.36801160976997e-203	0.7817296835951	0.722	0.484	3.43865101827965e-198	2	Crsca10aG0055600
1.1158974683476e-201	0.751923904139933	0.828	0.647	5.20789348477825e-197	2	Crsca12aG0069800
1.07530257909397e-198	1.17962211383597	0.726	0.544	5.01843713663156e-194	2	Crsca06aG0229000
6.20928809473273e-198	0.687100850140886	0.52	0.262	2.89787475381177e-193	2	Crsca07aG0197500
7.96302744170424e-197	1.47533016078981	0.3	0.122	3.71634490704337e-192	2	Crsca14aG0088700
5.37042183328676e-196	0.888426712979389	0.593	0.353	2.50637586959493e-191	2	Crsca17aG0140200
3.12188012367939e-192	1.41013917181271	0.366	0.175	1.45698145372117e-187	2	Crsca07aG0041100
2.32289818888924e-190	0.888941044425902	0.513	0.28	1.08409658475461e-185	2	Crsca16aG0149600
3.58040896815232e-187	2.56998297958788	0.284	0.12	1.67097686543669e-182	2	Crsca15aG0123600
5.92327193491131e-187	0.832631234627529	0.522	0.284	2.76439101202311e-182	2	Crsca02aG0293200
1.68822297347904e-186	0.618669973002917	0.654	0.401	7.8789366172267e-182	2	Crsca17aG0175900
5.37258156999326e-186	1.68895879530077	0.287	0.119	2.50738381871586e-181	2	Crsca01aG0068700
3.06229128129259e-185	1.26854931944419	0.376	0.18	1.42917134097925e-180	2	Crsca09aG0246500
3.15541681858064e-185	1.00435162084115	0.589	0.376	1.47263302923158e-180	2	Crsca13aG0099000
2.06881822242311e-184	1.41563080833929	0.328	0.146	9.65517464404865e-180	2	Crsca11aG0202900
2.13897465938861e-184	0.786755692747595	0.562	0.324	9.98259473536666e-180	2	Crsca01aG0088500
5.80781079321601e-182	1.46952488998165	0.274	0.109	2.71050529719391e-177	2	Crsca02aG0327700
1.84495994890563e-181	0.892379636416515	0.432	0.212	8.61042808154259e-177	2	Crsca03aG0304500
1.02016354345244e-180	1.27374483588613	0.372	0.18	4.76110325729253e-176	2	Crsca15aG0237500
1.59323850520562e-178	0.487363400122178	0.552	0.298	7.43564410379462e-174	2	Crsca17aG0206500
2.76168591221782e-164	0.667424755045563	0.583	0.349	1.28887881523206e-159	2	Crsca11aG0055800
3.95775998918233e-164	1.18098644618597	0.303	0.131	1.84708658695139e-159	2	Crsca10aG0133800
4.70345409280426e-164	1.38306689214909	0.326	0.154	2.19510202511175e-159	2	Crsca08aG0166400
4.07314276801257e-163	1.16624805986753	0.356	0.173	1.90093572983147e-158	2	Crsca14aG0110600
5.10686169066117e-162	0.791371293421095	0.488	0.27	2.38337235103157e-157	2	Crsca17aG0136500
9.7558307915752e-162	1.52361984838107	0.282	0.124	4.55304623042815e-157	2	Crsca13aG0253700
6.98138037506202e-161	0.765342180142662	0.527	0.314	3.25821022104144e-156	2	Crsca07aG0209000
1.53463364587788e-160	1.57633708646617	0.255	0.106	7.16213522531207e-156	2	Crsca03aG0127300
9.18665010999168e-160	1.02819186850434	0.411	0.215	4.28740960633312e-155	2	Crsca03aG0049900
7.67359021769515e-159	1.26958628072043	0.257	0.103	3.58126455459833e-154	2	Crsca16aG0154700
1.80925485175047e-157	1.29256445474378	0.313	0.146	8.44379239311944e-153	2	Crsca17aG0212900
5.46627298212948e-156	1.2177329185484	0.314	0.145	2.55110960075983e-151	2	Crsca09aG0108000
4.7788378048453e-155	0.579408837241299	0.721	0.492	2.2302836035213e-150	2	Crsca11aG0121800
1.1510059890033e-154	1.29331157569867	0.277	0.119	5.37174495067839e-150	2	Crsca13aG0004200
1.67717605494205e-151	1.4001415754667	0.371	0.198	7.82738064841454e-147	2	Crsca06aG0127900
4.71519863099839e-151	1.46862888171909	0.266	0.116	2.20058320108695e-146	2	Crsca07aG0131200
6.4035569660001e-150	0.991397540254343	0.368	0.184	2.98854003603225e-145	2	Crsca05aG0098500
7.10413917906333e-150	1.13903103247449	0.415	0.234	3.31550175486886e-145	2	Crsca06aG0274700
8.41013961975314e-147	0.800507807615639	0.543	0.347	3.92501216053879e-142	2	Crsca10aG0150000
1.36807906145804e-146	1.0035661873186	0.382	0.197	6.38482497982468e-142	2	Crsca14aG0125800
1.88107847935408e-146	0.463698953440623	0.407	0.206	8.77899326314548e-142	2	Crsca04aG0324900
2.44617824539103e-145	0.939739951121993	0.606	0.419	1.14163138712399e-140	2	Crsca16aG0075100
6.27350151628877e-143	1.18880968588373	0.277	0.124	2.92784315765197e-138	2	Crsca04aG0258100
1.04369695183242e-142	1.36139362373647	0.318	0.159	4.87093367420193e-138	2	Crsca16aG0054900
4.46178126419119e-142	1.00746317414741	0.473	0.287	2.08231331599803e-137	2	Crsca06aG0059100
1.2544643490223e-141	1.12551247327163	0.478	0.291	5.85458511688706e-137	2	Crsca06aG0141200
2.00975452394385e-141	0.775289445765174	0.609	0.424	9.37952436324596e-137	2	Crsca04aG0219600
6.42549315745573e-141	1.05825905524527	0.355	0.18	2.99877765658459e-136	2	Crsca16aG0102300
1.68372154873297e-139	1.01312109527223	0.433	0.251	7.85792846793676e-135	2	Crsca08aG0021100
8.21609361990244e-139	1.13021082819531	0.286	0.13	3.83445089240847e-134	2	Crsca02aG0104300
4.32353865769688e-137	1.0442071215606	0.427	0.246	2.01779549154713e-132	2	Crsca06aG0197000
6.38622335491571e-136	0.290694561598666	0.674	0.45	2.98045043973916e-131	2	Crsca04aG0214200
1.10914103495217e-134	0.795243123946022	0.58	0.398	5.17636121012177e-130	2	Crsca13aG0157800
3.04168549257681e-133	0.6858584957505	0.719	0.562	1.4195546193856e-128	2	Crsca10aG0044700
2.12503134728219e-130	1.06810819586631	0.391	0.22	9.91752129776596e-126	2	Crsca01aG0027500
3.27426524758294e-129	1.29846138146622	0.267	0.124	1.52809959104696e-124	2	Crsca12aG0025600
5.32319007416049e-129	0.659143549477442	0.616	0.425	2.4843328076107e-124	2	Crsca10aG0171700
3.33579265006173e-127	1.02588514509635	0.438	0.266	1.55681442978381e-122	2	Crsca06aG0147300
7.1523065004187e-127	0.951071608823588	0.399	0.226	3.33798144374541e-122	2	Crsca06aG0260000
1.830166057646e-125	0.583088729124036	0.471	0.268	8.5413849910339e-121	2	Crsca12aG0094000
2.51244486669701e-125	1.34814297563608	0.275	0.133	1.17255801928749e-120	2	Crsca16aG0205400
5.50869262914792e-125	0.908708636671361	0.395	0.22	2.57090685002333e-120	2	Crsca02aG0014900
8.67881576391401e-124	0.906294223396386	0.454	0.276	4.05040331701867e-119	2	Crsca07aG0093000
1.22333500860343e-123	1.38496342786251	0.651	0.52	5.7093044851522e-119	2	Crsca09aG0027800
4.87909643605393e-122	1.12196038629653	0.258	0.119	2.27707430670637e-117	2	Crsca04aG0301200
2.11187249280886e-121	1.03713956013106	0.357	0.197	9.85610892393894e-117	2	Crsca04aG0105800
2.12870982558351e-121	1.22065736139969	0.314	0.165	9.93468875599825e-117	2	Crsca01aG0040500
2.24000593600117e-121	0.703179049509917	0.48	0.293	1.04541077033175e-116	2	Crsca04aG0270600
3.44244223060143e-120	1.01448470864495	0.344	0.185	1.60658778902169e-115	2	Crsca17aG0232800
6.94073600755196e-120	1.24736321203411	0.376	0.224	3.2392414947245e-115	2	Crsca10aG0065700
4.50842452269536e-119	1.17818082423584	0.297	0.151	2.10408172474192e-114	2	Crsca07aG0133100
1.24588259324944e-118	0.791912771585744	0.493	0.317	5.81453406269513e-114	2	Crsca10aG0198900
1.43444190096019e-118	1.06895075794052	0.481	0.316	6.69454035178122e-114	2	Crsca05aG0195100
1.91921511137196e-118	0.917643870511582	0.405	0.237	8.95697692477296e-114	2	Crsca13aG0005800
3.21170701980116e-117	0.716443090548673	0.585	0.409	1.4989036661412e-112	2	Crsca16aG0175100
1.80036175938826e-116	1.06246347588594	0.265	0.126	8.402288331065e-112	2	Crsca01aG0256200
1.94555521171819e-115	0.32073131917865	0.397	0.213	9.07990617308878e-111	2	Crsca12aG0029100
2.07566091027323e-115	1.13781472904017	0.333	0.182	9.68710946824514e-111	2	Crsca11aG0169700
1.07564912794804e-114	0.985448548307461	0.401	0.242	5.02005448013352e-110	2	Crsca08aG0008900
6.70669343712555e-114	0.296563256288053	0.537	0.333	3.1300138271065e-109	2	Crsca16aG0205100
1.47383647245601e-113	0.864749858912144	0.377	0.214	6.87839481695219e-109	2	Crsca06aG0050900
5.72002785163384e-113	0.60606454205421	0.322	0.163	2.66953699835752e-108	2	Crsca15aG0144900
2.52509605073169e-111	0.662858618605032	0.562	0.381	1.17846232687648e-106	2	Crsca15aG0126700
4.31626391747189e-111	1.11632750823354	0.288	0.147	2.01440037028413e-106	2	Crsca12aG0234000
4.34947524526486e-111	1.06470153248703	0.359	0.206	2.02990009696511e-106	2	Crsca01aG0225100
7.52354205853452e-109	1.13296999046728	0.321	0.177	3.51123707871806e-104	2	Crsca04aG0195100
1.49196900564054e-108	1.24617934882048	0.286	0.149	6.9630193493244e-104	2	Crsca03aG0158400
8.70140554504831e-108	0.816985702103968	0.407	0.243	4.06094596787405e-103	2	Crsca13aG0067600
1.20506314675841e-107	0.742721526989145	0.352	0.19	5.62402970592149e-103	2	Crsca13aG0121500
1.90232117846416e-107	0.901904324397003	0.286	0.146	8.87813293989225e-103	2	Crsca11aG0065700
3.68924153315636e-107	0.77395062255507	0.566	0.405	1.72176902352407e-102	2	Crsca11aG0216700
3.69988261173152e-107	0.843630574461305	0.328	0.175	1.7267352148951e-102	2	Crsca07aG0043700
3.69390276276456e-106	1.00507	0.25	0.12	1.72394441938222e-101	2	Crsca15aG0117300
3.79820366364787e-105	0.984035378911659	0.303	0.161	1.77262164982446e-100	2	Crsca12aG0143700
4.80653998954499e-105	0.97613094513914	0.267	0.132	2.24321221312065e-100	2	Crsca03aG0298400
4.61857312328181e-104	0.532971270819166	0.651	0.474	2.15548807663562e-99	2	Crsca09aG0240300
7.33259969198093e-103	0.75971628874757	0.448	0.283	3.4221242762475e-98	2	Crsca10aG0034000
3.03349590344735e-102	1.09817552207971	0.309	0.169	1.41573253813888e-97	2	Crsca16aG0180600
5.23671982670977e-101	0.823215091058318	0.425	0.27	2.44397714312545e-96	2	Crsca02aG0277500
5.63921038958094e-101	1.0010239154699	0.305	0.167	2.63181948881742e-96	2	Crsca07aG0101600
1.66544845472459e-100	0.642489991738814	0.479	0.308	7.77264793819966e-96	2	Crsca17aG0133600
3.55523951863804e-98	0.801511504781241	0.39	0.235	1.65923028334837e-93	2	Crsca05aG0194300
3.96241780978149e-98	1.89957674410515	0.259	0.137	1.84926039182502e-93	2	Crsca09aG0247700
6.8965853515808e-98	0.275024608099643	0.401	0.226	3.21863638358276e-93	2	Crsca14aG0038900
1.40951554321314e-97	0.581950223572217	0.754	0.617	6.57820904017571e-93	2	Crsca16aG0143600
2.23620446498382e-97	0.506768846253395	0.343	0.186	1.04363662380795e-92	2	Crsca07aG0057000
5.12094312273719e-96	0.818210858764978	0.286	0.151	2.38994415538145e-91	2	Crsca09aG0217800
2.17654411285942e-95	0.805848363141948	0.489	0.337	1.01579313747149e-90	2	Crsca11aG0263700
1.87200874269998e-93	0.906516653080199	0.274	0.143	8.73666480218079e-89	2	Crsca10aG0058300
2.89033923744947e-93	0.609495690793158	0.454	0.286	1.34892132211767e-88	2	Crsca05aG0150200
1.20799156783062e-92	0.869396851172462	0.271	0.14	5.63769664706551e-88	2	Crsca07aG0032700
2.10770457169837e-92	0.962440116442003	0.319	0.183	9.83665723611629e-88	2	Crsca05aG0158500
2.51810866377623e-92	0.764567780186411	0.441	0.289	1.17520131338436e-87	2	Crsca11aG0189200
1.08653783707775e-91	0.755790933979303	0.313	0.172	5.07087208564184e-87	2	Crsca12aG0288700
2.94391543093692e-91	0.749853637984203	0.477	0.325	1.37392533161826e-86	2	Crsca03aG0171000
5.20167244287528e-91	0.484833422636675	0.768	0.646	2.42762052908989e-86	2	Crsca09aG0206400
2.49038778991395e-90	0.945333476766056	0.317	0.182	1.16226398155284e-85	2	Crsca17aG0116000
1.33288832865663e-89	0.666948825025955	0.386	0.236	6.22058982984048e-85	2	Crsca01aG0092200
2.65936554278288e-89	0.680014746850988	0.544	0.394	1.24112589881677e-84	2	Crsca02aG0043100
3.32442384246535e-89	0.829400376604238	0.38	0.233	1.55150860727858e-84	2	Crsca14aG0213400
5.35339999235562e-89	0.550762591984873	0.255	0.128	2.49843177643237e-84	2	Crsca16aG0209800
1.10812206790213e-88	0.598689971858227	0.333	0.187	5.17160569089923e-84	2	Crsca01aG0197000
4.4907885808993e-87	0.911115700670056	0.307	0.174	2.0958510307057e-82	2	Crsca12aG0013100
6.05623839053106e-87	0.874855424910707	0.274	0.148	2.82644645686085e-82	2	Crsca14aG0227000
1.92860162813258e-86	1.12602621327582	0.276	0.153	9.00078379849476e-82	2	Crsca02aG0142400
2.01379817865972e-86	0.722117321487816	0.31	0.173	9.39839609980493e-82	2	Crsca13aG0160300
8.15068841409234e-85	0.417565754600001	0.552	0.381	3.80392628285689e-80	2	Crsca14aG0140200
1.38054054086488e-84	0.469664233888635	0.351	0.2	6.44298270421642e-80	2	Crsca07aG0160200
3.53042479791639e-84	0.84359866683189	0.348	0.212	1.64764925318758e-79	2	Crsca12aG0211000
4.07958655421156e-84	0.693160982738489	0.53	0.387	1.90394304485053e-79	2	Crsca08aG0072900
5.42022693219315e-84	1.12001312058093	0.354	0.226	2.52961990925454e-79	2	Crsca14aG0085100
2.55941158375591e-83	0.614645630778836	0.634	0.498	1.19447738613888e-78	2	Crsca06aG0124400
5.31469444790093e-83	0.68949921647575	0.439	0.291	2.48036789883536e-78	2	Crsca01aG0027100
1.16461482844909e-82	0.642998101570369	0.524	0.377	5.43525740437192e-78	2	Crsca09aG0006000
6.15139090982343e-82	0.50370977167842	0.301	0.164	2.87085413761459e-77	2	Crsca06aG0173000
2.78232297364519e-81	1.20690086029473	0.283	0.165	1.29851013180021e-76	2	Crsca04aG0326300
3.35639689956057e-81	0.902834448243295	0.412	0.274	1.56643043302492e-76	2	Crsca06aG0199200
1.40682160000741e-80	0.521734376608768	0.476	0.315	6.56563640723457e-76	2	Crsca17aG0201000
3.5165476305626e-80	0.858992347966636	0.263	0.143	1.64117277918357e-75	2	Crsca03aG0189900
6.05054642262862e-80	0.78311052861825	0.416	0.279	2.82379001544078e-75	2	Crsca01aG0225300
2.43360712906059e-79	1.0432064509218	0.254	0.14	1.13576444713258e-74	2	Crsca07aG0200600
2.70009823647405e-79	0.825200819121299	0.264	0.144	1.26013584696244e-74	2	Crsca08aG0255400
1.23905545317472e-78	1.12557484839232	0.25	0.138	5.78267179996644e-74	2	Crsca04aG0163500
1.27296698393639e-78	0.539710089647163	0.325	0.188	5.94093691403113e-74	2	Crsca01aG0083200
7.43116806010673e-78	0.985870106755958	0.285	0.166	3.46812613365181e-73	2	Crsca03aG0126900
5.26914593263972e-77	0.795220184353859	0.256	0.138	2.45911040676296e-72	2	Crsca03aG0092400
7.41672485766845e-77	0.619550426088045	0.512	0.366	3.46138549107387e-72	2	Crsca09aG0133400
2.08469739483437e-76	0.714032761564959	0.416	0.279	9.729282741692e-72	2	Crsca10aG0240800
2.47826871403674e-76	0.518639199926957	0.659	0.524	1.15660800884095e-71	2	Crsca11aG0029900
7.93466136992437e-76	0.892707928504507	0.272	0.154	3.7031064613437e-71	2	Crsca14aG0040500
1.29224406975483e-75	0.980337201796497	0.25	0.139	6.03090307354581e-71	2	Crsca16aG0224000
1.3200938685411e-75	0.538546873178549	0.284	0.157	6.16087808448133e-71	2	Crsca01aG0010600
4.50226128068326e-75	1.02772145938165	0.269	0.156	2.10120533969488e-70	2	Crsca01aG0145000
2.70681238491715e-74	0.846132893689654	0.357	0.231	1.26326934004083e-69	2	Crsca15aG0157300
1.06564996163118e-73	0.95325139049534	0.255	0.144	4.97338837093273e-69	2	Crsca01aG0266600
2.19450333548836e-72	0.686835687178256	0.355	0.223	1.02417470667242e-67	2	Crsca15aG0018500
4.40647359938652e-72	0.96720374405443	0.285	0.17	2.05650122883369e-67	2	Crsca13aG0250000
6.30448322163732e-71	0.832792224541323	0.361	0.236	2.94230231953814e-66	2	Crsca06aG0138100
3.07324217597793e-70	0.399040322677011	0.394	0.244	1.4342821235289e-65	2	Crsca16aG0132900
1.94666764033008e-69	0.948545486439764	0.259	0.15	9.08509787742048e-65	2	Crsca09aG0147000
2.60947670347816e-69	0.734238205405553	0.391	0.266	1.21784277751326e-64	2	Crsca14aG0199100
9.20233472519552e-68	0.458654274660698	0.428	0.284	4.29472961624875e-63	2	Crsca06aG0128600
5.19707217454319e-67	0.594569535379698	0.534	0.406	2.42547358385931e-62	2	Crsca03aG0148500
1.39267283450853e-66	0.433785741419213	0.33	0.2	6.49960411865132e-62	2	Crsca04aG0189800
1.98847362213841e-66	0.674870630316125	0.409	0.28	9.28020639451998e-62	2	Crsca03aG0300300
3.46423454173554e-66	0.796123316081438	0.342	0.222	1.61675826062798e-61	2	Crsca13aG0112100
1.79193509263979e-65	0.679368362656855	0.379	0.254	8.36296107734992e-61	2	Crsca12aG0239400
7.1320862604635e-65	0.716216850485385	0.38	0.258	3.32854465775831e-60	2	Crsca06aG0175600
7.63661841479034e-65	0.358332741684025	0.458	0.318	3.56400981418265e-60	2	Crsca08aG0086500
4.10902933873653e-64	0.457387951404923	0.305	0.186	1.91768399238834e-59	2	Crsca12aG0020300
8.45052434454272e-64	0.784583125200297	0.324	0.206	3.94385971159809e-59	2	Crsca16aG0221500
2.93600113744817e-63	0.796812315993146	0.336	0.22	1.37023173084706e-58	2	Crsca02aG0005200
2.17707755567036e-62	0.729934995438438	0.309	0.195	1.01604209523136e-57	2	Crsca05aG0102900
2.73033868552121e-62	0.867074906063259	0.259	0.154	1.27424906453275e-57	2	Crsca17aG0242400
8.57520304144542e-62	0.777269658863667	0.258	0.152	4.00204725944258e-57	2	Crsca08aG0005200
1.57844396745744e-61	0.690072647154468	0.412	0.294	7.36659799612389e-57	2	Crsca06aG0135500
4.19952166405377e-61	0.649612344473539	0.294	0.178	1.9599167606139e-56	2	Crsca15aG0110000
1.58930569109029e-60	0.861212804557334	0.814	0.794	7.4172896603184e-56	2	Crsca10aG0244300
3.39201637289587e-60	0.657815897683882	0.393	0.272	1.5830540412305e-55	2	Crsca17aG0121900
4.28366542168981e-60	0.675954849880648	0.332	0.213	1.99918665230263e-55	2	Crsca04aG0198200
1.23979998751967e-59	0.765089051457471	0.307	0.197	5.78614654175429e-55	2	Crsca01aG0036900
1.35729282457285e-58	0.763186219837915	0.253	0.15	6.33448561228149e-54	2	Crsca15aG0017500
3.03468691993086e-58	0.7441934097922	0.308	0.197	1.41628838553173e-53	2	Crsca02aG0013100
3.68479111631879e-58	0.532911190535622	0.346	0.223	1.71969201398598e-53	2	Crsca04aG0334200
4.23372308756394e-58	0.705351900213818	0.36	0.245	1.97587856496609e-53	2	Crsca04aG0237500
2.79580515867347e-57	0.629877432515609	0.393	0.276	1.30480226755291e-52	2	Crsca17aG0134900
6.15661300846773e-57	0.614315469447908	0.253	0.149	2.87329129105189e-52	2	Crsca16aG0200700
1.95414046125234e-56	0.52133486753739	0.555	0.431	9.11997353266465e-52	2	Crsca17aG0231400
3.29742154044245e-56	0.45038132229572	0.282	0.171	1.53890663292449e-51	2	Crsca09aG0033900
4.5411242722482e-56	1.00983150737067	0.498	0.39	2.11934269785824e-51	2	Crsca12aG0288800
1.9411951505334e-55	0.61232544429732	0.32	0.207	9.05955776753936e-51	2	Crsca04aG0211400
2.72666960115651e-55	0.792001999608359	0.258	0.158	1.27253670285974e-50	2	Crsca12aG0134500
3.1372191487498e-54	1.31969828104712	0.269	0.176	1.46414017672153e-49	2	Crsca02aG0214600
1.07918904256888e-53	0.904781530610755	0.251	0.156	5.03657526166894e-49	2	Crsca07aG0224700
1.55650484094755e-53	0.610384264167435	0.534	0.421	7.26420809270221e-49	2	Crsca09aG0239400
1.7732328871712e-53	0.443059163536405	0.47	0.344	8.275677884428e-49	2	Crsca03aG0089700
3.8222114702852e-53	0.757502135011635	0.265	0.167	1.7838260931821e-48	2	Crsca01aG0135200
1.77719141482659e-52	0.685422340992565	0.336	0.23	8.29415233299572e-48	2	Crsca01aG0090600
1.12660877017269e-51	0.524988550129525	0.565	0.453	5.25788313039594e-47	2	Crsca01aG0034800
3.03380015418864e-51	0.743770114661487	0.374	0.272	1.41587453195984e-46	2	Crsca17aG0197900
4.57669455064597e-51	0.713797573033066	0.311	0.209	2.13594334678648e-46	2	Crsca10aG0231200
1.80117311318356e-50	0.800477013200152	0.266	0.171	8.40607491922765e-46	2	Crsca10aG0087600
4.12888120152243e-50	0.703843395629011	0.303	0.202	1.92694885675052e-45	2	Crsca06aG0121900
4.60657073005877e-50	0.915717048441956	0.355	0.257	2.14988655971843e-45	2	Crsca12aG0151400
6.69092518410157e-50	0.471691089295315	0.255	0.156	3.1226547834202e-45	2	Crsca13aG0236700
7.57753440938185e-50	0.53668723953432	0.4	0.289	3.53643530885851e-45	2	Crsca03aG0333800
8.3329726459053e-50	0.662566368649036	0.349	0.245	3.888998333844e-45	2	Crsca08aG0229800
2.24700106685798e-49	0.444584770182956	0.359	0.243	1.04867539790262e-44	2	Crsca08aG0118300
1.57652573263331e-48	0.579099602171037	0.418	0.31	7.35764559419968e-44	2	Crsca08aG0015300
3.88020454435983e-47	1.16457256510216	0.317	0.23	1.81089146085273e-42	2	Crsca07aG0248300
8.7546572451647e-47	0.785208927821135	0.277	0.185	4.08579853631836e-42	2	Crsca04aG0152000
1.08945686913881e-46	0.645537765951077	0.357	0.255	5.08449520827085e-42	2	Crsca16aG0080500
2.3136103208894e-46	0.550279916972567	0.312	0.21	1.07976193675909e-41	2	Crsca12aG0054500
3.57098351123401e-46	0.598928646596577	0.25	0.158	1.66657800469291e-41	2	Crsca04aG0084800
4.93874502195838e-46	0.599395980628407	0.337	0.234	2.30491230174798e-41	2	Crsca04aG0062100
5.1336887909128e-46	0.520114031955743	0.473	0.367	2.395892558719e-41	2	Crsca06aG0198300
5.62762265437585e-46	0.515151235189064	0.504	0.396	2.62641149279721e-41	2	Crsca01aG0226400
6.28127213663709e-46	0.29054584866461	0.719	0.602	2.93146970616853e-41	2	Crsca15aG0078600
4.64778010065167e-45	0.466959253716134	0.524	0.417	2.16911897297414e-40	2	Crsca16aG0154100
4.79586851925015e-45	0.673496601950489	0.25	0.159	2.23823183793405e-40	2	Crsca03aG0175300
2.10505019571895e-44	0.6642070934829	0.392	0.295	9.82426926342034e-40	2	Crsca12aG0130500
2.46337439911861e-44	0.370405009271236	0.549	0.433	1.14965683206865e-39	2	Crsca05aG0028200
9.82290037595401e-44	0.712498895455309	0.313	0.219	4.58434760545774e-39	2	Crsca11aG0062300
1.18148986788065e-43	0.583193013936172	0.338	0.239	5.514013213399e-39	2	Crsca16aG0210600
1.50975670214749e-43	0.470011828079483	0.424	0.317	7.04603452892233e-39	2	Crsca17aG0117600
2.9460299863843e-43	0.382964780291095	0.261	0.164	1.37491219464555e-38	2	Crsca11aG0184300
5.80806665451359e-43	0.632227733869253	0.296	0.203	2.71062470766149e-38	2	Crsca16aG0090200
1.09629326672779e-42	0.603023439628655	0.407	0.31	5.1164006758186e-38	2	Crsca17aG0084000
1.15332859999287e-42	0.723847253834623	0.273	0.183	5.38258457616671e-38	2	Crsca15aG0130600
1.66089059165873e-42	0.62543144046878	0.347	0.25	7.75137639127129e-38	2	Crsca07aG0202000
7.91137405842712e-42	0.632443806118561	0.262	0.173	3.69223827306793e-37	2	Crsca08aG0054500
3.82576327355393e-41	0.629905375155237	0.305	0.212	1.78548371976762e-36	2	Crsca02aG0210200
3.98162913805587e-41	0.585510678672796	0.341	0.245	1.85822631873068e-36	2	Crsca16aG0174500
1.92551664680044e-40	0.529183860847465	0.403	0.304	8.98638619061765e-36	2	Crsca08aG0025900
2.99860411423969e-40	0.930638984647369	0.332	0.245	1.39944854011566e-35	2	Crsca17aG0242000
2.16992135798534e-39	0.628113389318462	0.271	0.184	1.01270229777176e-34	2	Crsca15aG0166300
2.34282510184783e-39	0.773340564117045	0.334	0.25	1.09339647503238e-34	2	Crsca02aG0311300
2.38379203318181e-39	0.491723675326084	0.497	0.402	1.11251574188595e-34	2	Crsca05aG0124800
2.81923936935999e-39	0.620452410852095	0.3	0.211	1.31573901368031e-34	2	Crsca05aG0181400
3.87423645985875e-39	0.554984458469801	0.4	0.305	1.80810615581608e-34	2	Crsca12aG0115800
3.92596737337152e-39	0.627871972076133	0.359	0.269	1.83224897315249e-34	2	Crsca11aG0133300
1.09583017267284e-38	0.703534617844904	0.254	0.171	5.11423941586416e-34	2	Crsca05aG0093300
1.33607053963458e-38	0.612818472379376	0.339	0.249	6.23544120847459e-34	2	Crsca09aG0275100
1.25886485271394e-37	0.502889029648939	0.257	0.17	5.87512226761594e-33	2	Crsca08aG0026100
1.31009311546016e-37	0.716310512081716	0.656	0.605	6.11420456985255e-33	2	Crsca06aG0205500
2.02363333421039e-37	0.539466466359769	0.455	0.364	9.44429677075989e-33	2	Crsca12aG0028900
2.62634861253312e-37	0.401304312944714	0.389	0.285	1.22571689746921e-32	2	Crsca01aG0033000
2.99468565630392e-37	0.623546005127306	0.337	0.249	1.39761979579704e-32	2	Crsca02aG0065800
4.54782669515053e-37	0.51826441951097	0.388	0.295	2.12247071862675e-32	2	Crsca04aG0029100
4.90866352068829e-37	0.656484310256248	0.277	0.192	2.29087326510522e-32	2	Crsca14aG0119500
2.17803984760964e-36	0.571488416233633	0.39	0.297	1.01649119687942e-31	2	Crsca04aG0202200
2.49943710548245e-36	0.407923363160134	0.578	0.481	1.16648729712866e-31	2	Crsca12aG0075800
2.79119015697452e-36	0.605663456458737	0.261	0.178	1.30264844626001e-31	2	Crsca02aG0160000
9.02137360475517e-36	0.577500155132594	0.32	0.232	4.21027506133924e-31	2	Crsca12aG0009500
1.08598258728695e-35	0.653670350676898	0.311	0.226	5.06828073486817e-31	2	Crsca09aG0138500
1.4153360857679e-35	0.631832602593116	0.3	0.213	6.6053735122788e-31	2	Crsca14aG0027000
2.16278128282613e-35	0.465309915693365	0.472	0.38	1.00937002469496e-30	2	Crsca13aG0186600
2.55072718434558e-35	0.680449614780136	0.282	0.198	1.19042437693408e-30	2	Crsca12aG0115000
3.1658689842556e-34	0.496972403864169	0.414	0.32	1.47751105495209e-29	2	Crsca11aG0083600
7.42924887716678e-34	0.559385943216366	0.347	0.262	3.46723045097374e-29	2	Crsca10aG0166100
1.0038154868191e-33	0.566397575140153	0.287	0.204	4.68480687698473e-29	2	Crsca15aG0206400
1.59795629761022e-33	0.528966898398325	0.329	0.24	7.45766204094688e-29	2	Crsca05aG0133600
1.95237856321142e-32	0.453400646827706	0.312	0.223	9.11175075450771e-28	2	Crsca07aG0064000
4.16237795830376e-32	0.494462916412472	0.298	0.213	1.94258179314036e-27	2	Crsca14aG0219100
3.23125423608029e-31	0.573679315190989	0.269	0.192	1.50802635197867e-26	2	Crsca11aG0193500
1.41005027559119e-30	0.466447323016222	0.357	0.272	6.58070463618407e-26	2	Crsca17aG0076400
5.80221395009738e-30	0.658430623230365	0.256	0.183	2.70789325051045e-25	2	Crsca08aG0001700
1.28662540488757e-29	0.468430083086807	0.37	0.287	6.0046807646103e-25	2	Crsca15aG0015000
1.82522533744578e-29	0.620301046450377	0.252	0.18	8.51832664985945e-25	2	Crsca15aG0005000
1.01781368264443e-28	0.417502559920718	0.493	0.408	4.75013645690153e-24	2	Crsca16aG0175200
1.93110787859169e-28	0.380260143363481	0.409	0.325	9.01248046938739e-24	2	Crsca17aG0209000
3.22211490341513e-28	0.562118664259131	0.264	0.19	1.50376102542384e-23	2	Crsca12aG0147400
3.6591813951031e-28	0.527454213052385	0.348	0.27	1.70773995709462e-23	2	Crsca12aG0192700
9.35146366698279e-28	0.574639405653545	0.28	0.208	4.36432809338087e-23	2	Crsca05aG0079600
1.10313845615033e-27	0.421432560837622	0.388	0.307	5.14834717485359e-23	2	Crsca13aG0122100
1.17922992558778e-27	0.592792922416262	0.26	0.189	5.50346606271819e-23	2	Crsca09aG0227700
2.70984421514909e-27	0.585121654640146	0.25	0.18	1.26468429521008e-22	2	Crsca15aG0110100
1.09745896936504e-26	0.375815832788477	0.455	0.373	5.12184101002662e-22	2	Crsca12aG0257800
2.0184233608345e-26	0.267474227546885	0.254	0.177	9.41998182501459e-22	2	Crsca04aG0284500
1.15377556169268e-25	0.466668169572195	0.337	0.26	5.38467054641974e-21	2	Crsca08aG0208100
1.03453993306291e-24	0.322691661985991	0.447	0.367	4.82819786760462e-20	2	Crsca15aG0065100
1.53265315831903e-24	0.399202547380984	0.468	0.394	7.15289228987491e-20	2	Crsca15aG0096300
9.55579026945759e-24	0.294022863078162	0.531	0.449	4.45968731875586e-19	2	Crsca07aG0124300
1.30291804176885e-23	0.358625309675181	0.356	0.28	6.08071850093522e-19	2	Crsca14aG0226600
1.62687831112579e-23	0.284263823571465	0.274	0.207	7.59264107802406e-19	2	Crsca17aG0230500
2.20951764875409e-23	0.517914711833915	0.302	0.233	1.03118188667353e-18	2	Crsca04aG0226000
4.17676037487974e-23	0.507193674209071	0.316	0.247	1.94929406695638e-18	2	Crsca11aG0260000
5.93874426513068e-23	0.413742486151558	0.282	0.212	2.77161194853649e-18	2	Crsca10aG0149900
8.9726803351256e-23	0.466529992862278	0.255	0.189	4.18754991240312e-18	2	Crsca01aG0005300
9.39961323598425e-23	0.481297585347054	0.419	0.35	4.38679949723385e-18	2	Crsca17aG0005400
1.84672098804508e-22	0.545347014068518	0.273	0.208	8.61864685120638e-18	2	Crsca10aG0239400
6.64990590613114e-22	0.461797211632982	0.31	0.243	3.10351108639141e-17	2	Crsca02aG0250600
1.09303761225282e-21	0.500453590524501	0.283	0.217	5.10120653638392e-17	2	Crsca14aG0106200
1.27039315574384e-21	0.393598807360858	0.326	0.257	5.92892485785652e-17	2	Crsca01aG0290900
1.44485801378315e-21	0.37561424446821	0.32	0.25	6.74315235032595e-17	2	Crsca10aG0208400
2.44569293761988e-21	0.406064990643158	0.353	0.284	1.1414048939872e-16	2	Crsca06aG0199900
3.74795733790115e-21	0.415420374842661	0.315	0.248	1.74917168959847e-16	2	Crsca15aG0229400
9.25919734744464e-21	0.328904646741914	0.301	0.232	4.32126740205241e-16	2	Crsca15aG0136300
1.787271052977e-20	0.354509589422541	0.331	0.26	8.34119400424367e-16	2	Crsca02aG0001400
2.08892045672346e-20	0.567182688299144	0.296	0.234	9.74899177152837e-16	2	Crsca01aG0029600
2.15116501410627e-20	0.435380452741532	0.25	0.188	1.00394871208339e-15	2	Crsca10aG0184300
9.40728779983905e-20	0.362257722475918	0.381	0.315	4.39038121618488e-15	2	Crsca08aG0229400
1.3572284808251e-19	0.47034080300954	0.286	0.223	6.33418532001074e-15	2	Crsca15aG0182600
1.68539285566588e-19	0.407914034692424	0.286	0.222	7.86572845739265e-15	2	Crsca14aG0112400
2.88145514691839e-19	0.370460380271036	0.341	0.275	1.34477511706681e-14	2	Crsca09aG0062300
3.85910240430597e-19	0.540290837088224	0.316	0.259	1.8010430920896e-14	2	Crsca04aG0009500
5.00101438198466e-19	0.427965931322532	0.25	0.19	2.33397341207224e-14	2	Crsca09aG0276400
1.01596941246135e-18	0.389449989706486	0.325	0.26	4.74152924795713e-14	2	Crsca04aG0049000
2.5101385307319e-18	0.322709848750481	0.367	0.301	1.17148165229258e-13	2	Crsca17aG0174000
2.3232149428618e-16	0.370806756257231	0.301	0.241	1.0842444138336e-11	2	Crsca14aG0073300
7.02347686453451e-16	0.25833554426244	0.638	0.578	3.27785665267825e-11	2	Crsca02aG0214400
9.23799825338935e-16	0.355648644626343	0.279	0.222	4.31137378485681e-11	2	Crsca04aG0137800
1.18594794678307e-15	0.289169309506227	0.283	0.225	5.53481906763659e-11	2	Crsca12aG0087300
1.38883605765178e-15	0.518656201861279	0.581	0.538	6.48169788106088e-11	2	Crsca03aG0319100
1.44468360372984e-15	0.395109381286649	0.281	0.227	6.74233837860714e-11	2	Crsca04aG0200400
2.47585836209919e-14	0.253297965934292	0.255	0.203	1.15548309759169e-09	2	Crsca11aG0179800
5.75701283862431e-14	0.366507103373306	0.306	0.255	2.68679789178597e-09	2	Crsca03aG0144600
8.07247530795157e-14	0.334432946285364	0.252	0.199	3.767424226221e-09	2	Crsca11aG0044400
8.39223732739638e-14	0.285068263349789	0.333	0.276	3.91665716069589e-09	2	Crsca08aG0057800
5.57607006747364e-13	0.304714663122703	0.279	0.226	2.60235190048995e-08	2	Crsca03aG0053700
1.07032047161495e-12	0.402586634318309	0.289	0.241	4.99518564102695e-08	2	Crsca15aG0194000
2.5336992096703e-12	0.410772362431691	0.273	0.23	1.18247742115313e-07	2	Crsca09aG0066300
4.56813474999143e-12	0.281002466122828	0.258	0.209	2.131948487821e-07	2	Crsca09aG0274800
9.95148052722188e-12	0.315845220805836	0.357	0.309	4.64435596205445e-07	2	Crsca06aG0164400
1.29855939883857e-11	0.418992217815091	0.272	0.228	6.06037671437959e-07	2	Crsca12aG0287600
2.29196551589775e-10	0.388756672633121	0.346	0.301	1.06966030626948e-05	2	Crsca10aG0237700
6.85526847791174e-10	0.278441190341945	0.293	0.247	3.19935379864141e-05	2	Crsca01aG0275100
8.02680400174303e-09	0.257224583319796	0.258	0.219	0.000374610942761347	2	Crsca04aG0057800
9.43040186649384e-08	0.254062674909915	0.301	0.262	0.00440116855109267	2	Crsca12aG0236000
6.13542752507007e-07	0.377372043002035	0.306	0.273	0.028634040259502	2	Crsca07aG0195100
4.50015467022444e-06	0.285573072284116	0.256	0.227	0.210022218459374	2	Crsca17aG0018000
0.000854242756245474	0.277206377560199	0.333	0.315	1	2	Crsca06aG0060300
0.00215659777993694	0.688184507175899	0.253	0.241	1	2	Crsca17aG0242100
0	3.05160446344163	0.326	0.055	0	3	Crsca03aG0044200
0	2.97658743094712	0.303	0.053	0	3	Crsca01aG0210100
0	3.0298221810204	0.288	0.045	0	3	Crsca11aG0044000
0	2.71415732459121	0.278	0.058	0	3	Crsca04aG0009800
5.03878464528931e-309	2.31759616817161	0.294	0.078	2.35160079395652e-304	3	Crsca12aG0198600
1.1047348585677e-304	2.44711942214815	0.258	0.062	5.15579758493544e-300	3	Crsca06aG0101400
5.21326853274076e-286	2.12146110015261	0.257	0.064	2.43303242423011e-281	3	Crsca05aG0024500
3.1839554062664e-285	2.72447326974398	0.251	0.063	1.48595198810453e-280	3	Crsca12aG0009600
2.23494480455217e-283	2.24438685750618	0.355	0.12	1.0430487402845e-278	3	Crsca13aG0093000
9.36499175055055e-243	1.77258891202453	0.385	0.148	4.37064164998194e-238	3	Crsca09aG0200600
4.97775653783468e-240	2.10259380552102	0.27	0.08	2.32311897620744e-235	3	Crsca07aG0031800
2.39477243417139e-234	1.76551411187225	0.362	0.135	1.11764029502779e-229	3	Crsca17aG0236700
2.02477618915283e-219	1.61723640891912	0.382	0.153	9.44963047477625e-215	3	Crsca01aG0145400
7.27373875046647e-199	1.10279929948891	0.576	0.313	3.3946538748427e-194	3	Crsca12aG0278600
1.4217314289792e-176	1.56029564620913	0.387	0.178	6.63522057904595e-172	3	Crsca04aG0009700
7.64990157795759e-169	1.46577851482248	0.363	0.161	3.57020906643281e-164	3	Crsca02aG0317300
3.76026029183872e-158	1.23418354536702	0.547	0.314	1.75491347820113e-153	3	Crsca09aG0003400
7.64086638021844e-158	1.32420712070162	0.366	0.166	3.56599233964795e-153	3	Crsca03aG0037700
5.35923018485576e-153	1.46495649768092	0.394	0.187	2.50115272727218e-148	3	Crsca12aG0080300
9.81864324729754e-135	1.48329881734617	0.327	0.15	4.58236080351376e-130	3	Crsca02aG0050400
4.75277665218471e-130	1.11734881459242	0.521	0.321	2.2181208635746e-125	3	Crsca02aG0317000
2.57036434523145e-129	1.3248371928975	0.278	0.117	1.19958903991952e-124	3	Crsca07aG0100600
2.60070448892151e-124	1.17897280271074	0.262	0.108	1.21374878497967e-119	3	Crsca14aG0091600
4.13587920203179e-124	1.06002580302805	0.427	0.232	1.93021482358823e-119	3	Crsca02aG0187500
1.46378367631752e-123	1.28374	0.313	0.145	6.83147841737385e-119	3	Crsca07aG0159900
5.51691594228606e-117	1.28293599605121	0.254	0.107	2.57474467026491e-112	3	Crsca08aG0059100
7.45981689862843e-117	0.744873970444727	0.712	0.521	3.48149654658989e-112	3	Crsca13aG0034300
6.32168009439755e-111	1.03945410045705	0.424	0.236	2.95032810005534e-106	3	Crsca04aG0240000
2.63235090523598e-110	1.26456273181684	0.35	0.18	1.22851816747363e-105	3	Crsca07aG0202200
8.74788268514799e-107	1.20009479216005	0.362	0.191	4.08263684915857e-102	3	Crsca13aG0071800
7.71214731953417e-105	1.19453246704487	0.274	0.126	3.5992591540266e-100	3	Crsca08aG0176200
7.65080829860028e-103	0.848720320223664	0.483	0.285	3.57063223295675e-98	3	Crsca03aG0333800
1.01987820950721e-102	1.33806019115495	0.325	0.166	4.75977160377013e-98	3	Crsca07aG0106700
1.27686074273824e-101	0.793856749106375	0.541	0.343	5.95910908635937e-97	3	Crsca06aG0215400
3.42122742142232e-101	1.20035012865872	0.303	0.149	1.5966868375778e-96	3	Crsca15aG0017500
1.25258845730857e-91	0.871225070504507	0.347	0.184	5.84583033025908e-87	3	Crsca12aG0043900
7.57345566213807e-88	0.838500955515407	0.346	0.186	3.53453175751984e-83	3	Crsca16aG0055400
2.63763557314492e-83	1.06805868184358	0.314	0.17	1.23098452198673e-78	3	Crsca07aG0101600
3.09058887589871e-80	0.661546940734569	0.576	0.399	1.44237782838193e-75	3	Crsca15aG0006700
8.17880024282873e-80	1.20636200189341	0.253	0.125	3.81704607332817e-75	3	Crsca05aG0117800
1.71253051555596e-77	0.749728004197674	0.529	0.36	7.99237991609965e-73	3	Crsca12aG0028900
6.55117434833101e-77	0.706436963591056	0.408	0.242	3.05743306836608e-72	3	Crsca13aG0005800
1.00514566176697e-76	1.52297586664621	0.252	0.131	4.69101480346644e-72	3	Crsca04aG0258100
1.16418619822439e-75	0.899775805619496	0.305	0.165	5.43325698711323e-71	3	Crsca12aG0143700
3.74951508381068e-72	1.01483496054963	0.276	0.148	1.74989868961444e-67	3	Crsca12aG0049500
2.85342602692878e-71	0.957107107228263	0.263	0.136	1.33169392676766e-66	3	Crsca17aG0155800
4.8388049045774e-69	0.676140255914004	0.324	0.181	2.25827024896627e-64	3	Crsca01aG0108100
5.65773316043787e-67	0.673275356138696	0.408	0.253	2.64046406597635e-62	3	Crsca03aG0166100
8.43584076965076e-67	0.805959595212314	0.25	0.129	3.93700688719601e-62	3	Crsca14aG0189600
3.4220976457219e-65	0.679044491120395	0.397	0.246	1.59709297125841e-60	3	Crsca02aG0065800
5.63772935483675e-65	0.904510119558468	0.295	0.168	2.63112828990231e-60	3	Crsca13aG0192300
6.8098985661051e-65	0.845728346900875	0.356	0.214	3.17817966080125e-60	3	Crsca09aG0185700
2.2809529998053e-64	0.681026983000432	0.34	0.199	1.06452076500913e-59	3	Crsca06aG0093300
3.07895183779238e-64	0.864839195476437	0.302	0.173	1.43694682269771e-59	3	Crsca17aG0006800
5.3092885828379e-64	0.763650650172182	0.385	0.238	2.47784498161045e-59	3	Crsca02aG0016700
8.09586326226958e-64	0.719414154867973	0.291	0.161	3.77833938450121e-59	3	Crsca07aG0141100
2.84526207973914e-63	0.712050424191109	0.589	0.428	1.32788381261426e-58	3	Crsca06aG0095700
4.7274983506461e-63	0.90543008174279	0.258	0.139	2.20632348024654e-58	3	Crsca03aG0045000
8.53483652892103e-63	0.678679061349913	0.374	0.23	3.98320820804744e-58	3	Crsca12aG0009500
1.00612371069568e-62	0.905636709460412	0.394	0.256	4.69557935781672e-58	3	Crsca12aG0151800
5.01918291596966e-62	0.399593454664138	0.601	0.414	2.34245266688304e-57	3	Crsca17aG0175900
5.07646351084601e-62	0.903802725753934	0.51	0.354	2.36918552051183e-57	3	Crsca01aG0085900
5.48961750705694e-62	0.601460133631955	0.411	0.258	2.56200449054347e-57	3	Crsca16aG0183400
1.36732690442217e-61	0.60739239548769	0.411	0.258	6.38131466293824e-57	3	Crsca10aG0166100
1.44812605424877e-60	0.725249999060337	0.274	0.151	6.75840429517902e-56	3	Crsca14aG0079600
2.78913571314868e-59	0.420836233428714	0.652	0.477	1.30168963732649e-54	3	Crsca12aG0075800
3.32518725886612e-57	0.652956539962664	0.426	0.282	1.55186489371282e-52	3	Crsca10aG0240800
4.16555002953102e-57	0.825150032603666	0.311	0.186	1.94406219878213e-52	3	Crsca16aG0116900
1.04010078975864e-56	0.587201444648991	0.412	0.266	4.85415038580356e-52	3	Crsca11aG0133300
2.67795141964299e-56	0.935824739647786	0.302	0.178	1.24979992754738e-51	3	Crsca06aG0245400
2.32334909496557e-55	0.434009353598175	0.581	0.415	1.08430702262043e-50	3	Crsca16aG0154100
2.85478701476637e-55	0.645781418338854	0.4	0.26	1.33232909979147e-50	3	Crsca01aG0127900
5.5036735216892e-54	0.5746512711662	0.403	0.261	2.56856443257235e-49	3	Crsca02aG0191500
6.14362851888081e-54	0.796206868401514	0.287	0.169	2.86723142976167e-49	3	Crsca04aG0013700
2.53334342259533e-53	0.546943659355078	0.349	0.215	1.18231137532524e-48	3	Crsca07aG0097500
3.26175963565669e-53	0.589238158092472	0.298	0.174	1.52226322196098e-48	3	Crsca02aG0036400
1.26167888047086e-52	0.499819083608706	0.478	0.328	5.8882553351575e-48	3	Crsca02aG0188200
8.24847194011289e-52	0.580260928801353	0.415	0.275	3.84956185445068e-47	3	Crsca02aG0324400
2.53001109115186e-50	0.623283751247505	0.353	0.226	1.18075617624057e-45	3	Crsca12aG0040800
1.09607242658993e-49	0.387791036628251	0.355	0.224	5.11537001489521e-45	3	Crsca09aG0066300
1.29952820326162e-49	0.571666570814618	0.47	0.325	6.06489812462198e-45	3	Crsca07aG0085300
1.47667364103377e-49	0.655728905496025	0.303	0.184	6.8916358827046e-45	3	Crsca16aG0159700
2.45908901699534e-49	0.487284161747221	0.394	0.257	1.14765684423173e-44	3	Crsca09aG0113200
4.73184944746313e-49	0.73089973229434	0.271	0.16	2.20835413713104e-44	3	Crsca14aG0116200
2.29590441199782e-48	0.493866493263358	0.36	0.229	1.07149858907938e-43	3	Crsca07aG0248300
8.75702077154264e-48	0.556461112615695	0.344	0.217	4.08690159407895e-43	3	Crsca04aG0175700
3.46568243287402e-47	0.425827978303531	0.439	0.292	1.61743399142231e-42	3	Crsca17aG0101600
1.13491365682281e-46	0.816608451141783	0.281	0.173	5.29664203639204e-42	3	Crsca08aG0262700
2.89048032063834e-46	0.538986108146085	0.281	0.167	1.34898716564191e-41	3	Crsca09aG0021900
1.59079327335634e-45	0.586269857835314	0.329	0.21	7.42423220675402e-41	3	Crsca16aG0192100
2.35797064231898e-45	0.699430899421767	0.418	0.292	1.10046489877027e-40	3	Crsca12aG0075600
2.36631622263603e-45	0.855346921997939	0.288	0.179	1.10435978110424e-40	3	Crsca13aG0160300
5.87845028542262e-44	0.421531774053397	0.474	0.33	2.74347274820674e-39	3	Crsca03aG0171000
5.96299945608257e-44	0.647610308908692	0.287	0.176	2.78293184615373e-39	3	Crsca09aG0258200
1.84035358412389e-43	0.536553711336065	0.428	0.297	8.58893017710618e-39	3	Crsca17aG0174000
1.32555751275208e-42	0.72358550839798	0.486	0.346	6.18637691201398e-38	3	Crsca05aG0087900
3.26247493551753e-42	0.503580986377196	0.528	0.402	1.52259705240603e-37	3	Crsca05aG0124800
3.80843386583155e-42	0.453776102184689	0.398	0.268	1.77739608518358e-37	3	Crsca03aG0272800
4.46547041222954e-42	0.399356746091385	0.444	0.303	2.08403504138752e-37	3	Crsca15aG0005400
8.77196392993272e-42	0.497804749917959	0.383	0.258	4.0938755660996e-37	3	Crsca02aG0001400
3.1897258613022e-41	0.626879299075054	0.331	0.218	1.48864505946974e-36	3	Crsca14aG0009300
3.44985050736168e-41	0.390572682548054	0.461	0.321	1.61004523178569e-36	3	Crsca14aG0023200
5.76583794302128e-41	0.574658036224438	0.285	0.178	2.69091656800803e-36	3	Crsca01aG0056500
8.60588243078643e-41	0.434395019913243	0.278	0.17	4.01636533044802e-36	3	Crsca11aG0040900
1.35011105330788e-40	0.589470772368658	0.416	0.298	6.30096828578786e-36	3	Crsca06aG0059100
8.97221944880757e-40	0.387567395155434	0.886	0.776	4.18733481675849e-35	3	Crsca02aG0034900
9.67591788522026e-40	0.517961369883387	0.285	0.177	4.5157508770323e-35	3	Crsca06aG0023700
1.05800008240019e-39	0.448627903138293	0.322	0.206	4.93768638456167e-35	3	Crsca08aG0198600
2.12688188352557e-39	0.484119374929551	0.333	0.218	9.92615775041385e-35	3	Crsca03aG0042900
5.58315389323258e-39	0.436484174759316	0.411	0.283	2.60565792197165e-34	3	Crsca17aG0015800
7.68101480830652e-39	0.423959715363266	0.478	0.345	3.58472961103665e-34	3	Crsca12aG0092600
1.90074120632317e-38	0.379540597985885	0.432	0.299	8.87075920991021e-34	3	Crsca09aG0169100
2.1861129690891e-38	0.587669790777752	0.252	0.154	1.02025892267388e-33	3	Crsca08aG0197700
3.05014948386465e-38	0.661722394819903	0.265	0.165	1.42350476411963e-33	3	Crsca16aG0149300
6.72934540397187e-38	0.470579883174741	0.398	0.277	3.14058550003367e-33	3	Crsca09aG0203800
4.97742221832617e-37	0.53395007354647	0.258	0.16	2.32296294929282e-32	3	Crsca10aG0172500
6.69483613279113e-37	0.422256767169966	0.446	0.316	3.12448002317362e-32	3	Crsca04aG0002900
7.11380536589474e-37	0.469786842928165	0.305	0.197	3.32001296426308e-32	3	Crsca06aG0268800
2.07489835086181e-36	0.476669841666465	0.33	0.219	9.68355060347209e-32	3	Crsca16aG0054200
2.82986080929788e-36	0.334206166537517	0.739	0.604	1.32069603969932e-31	3	Crsca15aG0078600
4.33258358107347e-36	0.466157241101997	0.422	0.304	2.02201675728699e-31	3	Crsca09aG0153900
5.7148751543667e-36	0.619995924558062	0.361	0.247	2.66713223454294e-31	3	Crsca08aG0118300
4.79788352743791e-35	0.580786176782031	0.255	0.16	2.23917224225527e-30	3	Crsca09aG0177700
6.14673039943436e-35	0.501973789957445	0.47	0.346	2.86867907741601e-30	3	Crsca14aG0225500
1.26305374666869e-34	0.344219653664338	0.581	0.447	5.89467183570276e-30	3	Crsca03aG0115700
7.82824273025332e-34	0.614068373807172	0.253	0.161	3.65344088220922e-29	3	Crsca01aG0103500
2.67663940847003e-33	0.744787484944052	0.316	0.218	1.24918761193296e-28	3	Crsca13aG0060000
3.66730218314976e-33	0.393712619977839	0.356	0.243	1.71152992887599e-28	3	Crsca11aG0048000
7.24376339820123e-33	0.412696706390121	0.389	0.272	3.38066437794051e-28	3	Crsca12aG0137200
3.75832328846281e-32	0.617278544853845	0.309	0.206	1.75400947872559e-27	3	Crsca14aG0165700
4.08708437318229e-32	0.315062276200511	0.551	0.413	1.90744227696418e-27	3	Crsca12aG0070100
2.58378713723128e-31	0.366154917947417	0.461	0.338	1.20585345694584e-26	3	Crsca03aG0056900
2.67160809532277e-31	0.458254224313033	0.535	0.408	1.24683949808714e-26	3	Crsca13aG0157800
2.92795875400723e-31	0.54466724853984	0.321	0.221	1.36647835049517e-26	3	Crsca15aG0182600
3.16146610395332e-31	0.425026367129541	0.393	0.28	1.47545623071501e-26	3	Crsca06aG0199200
4.29097599243903e-31	0.419572564729245	0.36	0.252	2.00259849567129e-26	3	Crsca07aG0202000
1.00148424677399e-29	0.426677423256018	0.29	0.192	4.67392697969421e-25	3	Crsca05aG0042900
9.33944402077084e-29	0.3839267822533	0.269	0.177	4.35871852449375e-24	3	Crsca05aG0011900
1.23550952845991e-28	0.256256977880376	0.455	0.328	5.76612296932242e-24	3	Crsca02aG0003100
6.84192571345844e-28	0.617828049753605	0.321	0.23	3.19312673047106e-23	3	Crsca04aG0334200
7.92047902866262e-28	0.378278222426833	0.254	0.167	3.69648756267684e-23	3	Crsca05aG0193700
1.11708141593097e-26	0.492876860004413	0.369	0.271	5.21341896814983e-22	3	Crsca15aG0136400
1.60393640560016e-26	0.371825365649895	0.267	0.179	7.48557120493593e-22	3	Crsca14aG0225800
3.60827143416911e-26	0.486812034366758	0.345	0.247	1.68398027832673e-21	3	Crsca15aG0229400
7.10856491661558e-26	0.386580029117605	0.26	0.174	3.31756724658449e-21	3	Crsca03aG0101300
2.37046123883537e-25	0.409319387516962	0.256	0.172	1.10629426016447e-20	3	Crsca08aG0198500
2.57514164598756e-25	0.303080599639584	0.304	0.21	1.2018186061824e-20	3	Crsca03aG0117700
2.75515563237476e-25	0.271860028640841	0.337	0.237	1.2858311336293e-20	3	Crsca05aG0185600
2.8485217812492e-25	0.402228438903223	0.272	0.187	1.329405115309e-20	3	Crsca05aG0039700
3.63144134359554e-25	0.361955007929562	0.277	0.189	1.69479367505604e-20	3	Crsca16aG0226300
4.64367349445927e-25	0.295103086039066	0.283	0.193	2.16720241986414e-20	3	Crsca08aG0218500
8.05261554011572e-25	0.392832696807895	0.371	0.272	3.75815567257201e-20	3	Crsca14aG0199100
1.28506867398286e-24	0.431193893522434	0.262	0.178	5.99741550147802e-20	3	Crsca15aG0035000
6.88841531334925e-24	0.472334608909543	0.762	0.65	3.21482342674009e-19	3	Crsca09aG0206400
1.46947370655029e-23	0.26669090867326	0.266	0.181	6.85803378847021e-19	3	Crsca15aG0005000
1.58474835425053e-23	0.250629810641991	0.516	0.398	7.39602056928722e-19	3	Crsca01aG0226400
3.28238007106302e-23	0.370698900671633	0.257	0.176	1.53188677916511e-18	3	Crsca01aG0270900
9.74107571258857e-23	0.366804130681868	0.269	0.187	4.54616003506509e-18	3	Crsca01aG0018500
2.63968538454651e-22	0.404210552743439	0.255	0.177	1.23194116896786e-17	3	Crsca02aG0030500
2.79643148176604e-22	0.277553138052043	0.335	0.242	1.30509457254021e-17	3	Crsca16aG0210600
2.90304319457801e-22	0.260578358659169	0.262	0.179	1.35485025890956e-17	3	Crsca06aG0209600
6.92632810722367e-22	0.259585057021699	0.255	0.174	3.23251732764128e-17	3	Crsca09aG0059900
8.83642916086318e-22	0.358569628773207	0.26	0.181	4.12396148937485e-17	3	Crsca14aG0052300
2.23836584275212e-21	0.339488697795925	0.284	0.2	1.04464533881241e-16	3	Crsca05aG0102900
3.53398481381762e-21	0.388711708972274	0.252	0.176	1.64931071260868e-16	3	Crsca03aG0332000
5.60349055845293e-21	0.26209973578664	0.37	0.276	2.61514904362998e-16	3	Crsca03aG0231000
5.75632023172261e-21	0.487463303214016	0.486	0.392	2.68647465214494e-16	3	Crsca13aG0099000
1.76264648903108e-19	0.29416154591576	0.25	0.174	8.22627116430803e-15	3	Crsca10aG0065200
3.39286545533456e-18	0.28415913147644	0.276	0.199	1.58345030800464e-13	3	Crsca06aG0248200
4.3867903715842e-18	0.281816110484727	0.264	0.19	2.04731506641835e-13	3	Crsca11aG0183300
4.17641117452235e-15	0.44155699195898	0.292	0.224	1.94913109514958e-10	3	Crsca11aG0062300
7.66523775141654e-15	0.257275143044979	0.272	0.201	3.5773664585861e-10	3	Crsca01aG0233900
1.83749996206016e-14	0.788093523871444	0.548	0.469	8.57561232293477e-10	3	Crsca05aG0189500
2.96717962670812e-14	0.304495469561911	0.364	0.288	1.38478273178468e-09	3	Crsca03aG0300300
3.66856241443602e-14	0.352694654138843	0.263	0.198	1.71211807881729e-09	3	Crsca17aG0232800
2.21554688936672e-13	0.3260871371603	0.284	0.219	1.03399573326745e-08	3	Crsca14aG0106200
2.26420198127815e-13	0.30940146949246	0.347	0.275	1.05670306466251e-08	3	Crsca16aG0115400
7.88927280320666e-13	0.271605669038023	0.25	0.188	3.68192361725655e-08	3	Crsca04aG0195100
0	1.47950520423528	0.745	0.432	0	4	Crsca08aG0203900
0	1.35900398903988	0.919	0.607	0	4	CrscaPtG0000100
0	1.67343109206952	0.849	0.537	0	4	CrscaPtG0004700
0	1.2992453342848	0.79	0.496	0	4	CrscaPtG0002800
0	1.35885586707996	0.957	0.694	0	4	CrscaPtG0002900
0	1.22222317118991	0.842	0.589	0	4	Crsca06aG0205500
0	1.02966358696602	0.954	0.761	0	4	Crsca01aG0050600
0	0.859323965884402	0.974	0.822	0	4	CrscaPtG0004600
7.90340605791181e-312	1.15416189280857	0.801	0.538	3.68851960722744e-307	4	CrscaPtG0003100
1.53050155005269e-292	1.0142383106574	0.881	0.68	7.1428507340959e-288	4	CrscaPtG0002200
5.56979691285149e-289	1.18235485897997	0.77	0.514	2.59942421922779e-284	4	CrscaPtG0003200
3.13661621217643e-276	1.31219814508298	0.678	0.405	1.46385878622274e-271	4	Crsca09aG0210600
9.28364319279167e-273	0.857025710758403	0.89	0.688	4.33267627807587e-268	4	Crsca14aG0220700
6.97278713765398e-272	1.40660016409411	0.615	0.33	3.25419975714311e-267	4	Crsca09aG0178100
9.24725111487134e-267	1.6417690117138	0.529	0.252	4.31569209531045e-262	4	Crsca03aG0006000
6.8917203098857e-266	0.758626935226434	0.924	0.808	3.21636586862366e-261	4	Crsca02aG0254100
6.61152652318427e-252	0.730010115111828	0.891	0.776	3.0855994283701e-247	4	Crsca02aG0034900
1.55656020097702e-239	0.821173161494653	0.889	0.711	7.26446645795977e-235	4	CrscaPtG0002400
5.79878599611033e-222	1.29420823347387	0.59	0.336	2.70629342438469e-217	4	Crsca06aG0049500
1.33080387438425e-221	0.699745052589789	0.913	0.816	6.21086168175131e-217	4	Crsca03aG0221800
3.72644675556067e-217	1.42119765236153	0.549	0.298	1.73913270082016e-212	4	Crsca02aG0312600
5.61979616718076e-212	1.27769463770547	0.606	0.384	2.62275887122326e-207	4	Crsca02aG0034800
2.05181266324706e-209	1.74590804810981	0.364	0.147	9.57580969937403e-205	4	Crsca07aG0000200
4.8112895074548e-196	1.51931305605437	0.484	0.254	2.24542881312916e-191	4	Crsca03aG0001400
1.9024890717389e-195	1.44945577378534	0.511	0.278	8.87891649780547e-191	4	CrscaPtG0002300
2.31592703682266e-189	1.36983161378509	0.525	0.303	1.08084314808513e-184	4	Crsca02aG0292100
7.11878689904926e-189	0.903205136757287	0.73	0.518	3.32233784578629e-184	4	Crsca09aG0027800
1.63763601807678e-186	1.06204082607616	0.636	0.416	7.64284729636431e-182	4	CrscaPtG0003900
1.16922079872422e-184	1.42538890827279	0.512	0.287	5.45675346764596e-180	4	CrscaPtG0000700
8.11895881153701e-179	1.05915040367884	0.636	0.442	3.78911807734432e-174	4	Crsca03aG0115700
3.85277236478458e-175	0.505800832809349	0.91	0.786	1.79808886264497e-170	4	Crsca10aG0244300
6.14807145606851e-163	1.12432592154376	0.581	0.369	2.86930494854717e-158	4	Crsca08aG0218700
2.40926219985007e-159	1.56373891145609	0.362	0.169	1.12440266867003e-154	4	Crsca03aG0007700
1.0948759540711e-155	1.38141750710645	0.46	0.26	5.10978607764981e-151	4	Crsca07aG0195100
6.19440515791768e-155	1.10363619437521	0.608	0.42	2.89092888720018e-150	4	Crsca04aG0193200
8.04202861739973e-154	1.71178801516948	0.272	0.107	3.75321475574045e-149	4	Crsca03aG0018100
5.85318575388209e-151	1.26654202817156	0.504	0.311	2.73168179133677e-146	4	Crsca04aG0002900
4.03967890035247e-150	0.255663179410353	0.997	0.987	1.8853181427945e-145	4	Crsca08aG0038800
1.18405964671786e-148	1.14091920021836	0.545	0.342	5.52600637123227e-144	4	Crsca04aG0139100
8.18591997741099e-147	1.54070369236444	0.382	0.194	3.82036885345771e-142	4	Crsca03aG0011400
1.3668940935083e-146	0.839620432380964	0.68	0.53	6.37929473440322e-142	4	Crsca03aG0319100
4.50430578544352e-145	1.00433002790466	0.658	0.491	2.10215951006649e-140	4	Crsca02aG0065300
4.59267264579377e-144	1.23789202414389	0.436	0.238	2.14340032379195e-139	4	Crsca17aG0242000
4.42836336404048e-143	0.95433294646339	0.671	0.508	2.06671718199769e-138	4	CrscaMtG0002600
6.18814481633622e-142	1.67536071751275	0.287	0.123	2.88800718578412e-137	4	Crsca03aG0004300
6.00158267904604e-141	1.51869945825738	0.376	0.193	2.80093863631079e-136	4	Crsca03aG0002000
2.97330823848199e-139	0.993848429216762	0.602	0.416	1.38764295489955e-134	4	CrscaMtG0000900
6.28806697633286e-135	1.5600678925765	0.34	0.167	2.93464085785455e-130	4	Crsca03aG0009000
1.24988507745026e-129	1.52111161271021	0.35	0.179	5.83321365646034e-125	4	Crsca06aG0008000
2.39743863163918e-121	1.3820088732558	0.37	0.199	1.11888460938601e-116	4	CrscaPtG0003600
4.22161016312926e-116	1.51127975528733	0.291	0.138	1.97022546313243e-111	4	Crsca03aG0018900
6.96203938840407e-115	0.749817558997098	0.698	0.599	3.24918378256818e-110	4	Crsca01aG0161500
1.09387452276871e-114	1.57401497232354	0.287	0.136	5.10511239776155e-110	4	Crsca03aG0001000
1.41870530889892e-112	0.761337906864449	0.658	0.492	6.62109767663126e-108	4	CrscaMtG0005800
2.54768202222849e-112	1.20511991513765	0.419	0.248	1.18900319977404e-107	4	CrscaPtG0001000
2.57742392414652e-110	1.43226088703061	0.325	0.169	1.20288374539918e-105	4	Crsca11aG0182300
7.19127981895492e-108	1.31601142727561	0.387	0.226	3.35617029150626e-103	4	Crsca03aG0010300
1.00290984635137e-105	1.03129787397087	0.513	0.354	4.68058025292184e-101	4	Crsca05aG0002400
1.21295325400643e-105	1.28266830358865	0.371	0.212	5.66085283644799e-101	4	Crsca15aG0159400
8.8688642388881e-105	0.893508341915513	0.559	0.412	4.13909894028908e-100	4	Crsca12aG0070100
2.85035030008617e-102	1.57766611088613	0.267	0.129	1.33025848505022e-97	4	Crsca02aG0156600
3.21422832374641e-102	1.22626927102614	0.403	0.245	1.50008035869245e-97	4	CrscaPtG0004800
3.45939880586359e-99	0.792022452981522	0.578	0.431	1.61450142269654e-94	4	Crsca17aG0136000
2.18763950488325e-98	0.944207560223511	0.5	0.345	1.02097135692901e-93	4	Crsca05aG0087900
4.24016982307807e-97	1.14215697986951	0.384	0.229	1.97888725643054e-92	4	Crsca17aG0242100
1.17690589416285e-95	0.707693990840172	0.51	0.344	5.49261980805801e-91	4	Crsca11aG0130300
2.28902901092761e-93	0.933638827610314	0.5	0.348	1.06828983939992e-88	4	Crsca15aG0099700
4.17994959492869e-88	1.55178235730816	0.253	0.127	1.95078247595322e-83	4	Crsca03aG0009200
5.21504068155665e-87	1.42567889045039	0.268	0.138	2.43385948608249e-82	4	Crsca03aG0278600
5.60255993695593e-87	1.2958437015975	0.339	0.197	2.61471472257733e-82	4	CrscaPtG0005100
1.0362526323193e-86	0.791296302661837	0.655	0.535	4.8361910350342e-82	4	Crsca14aG0044500
3.73891126182345e-85	1.0801788713323	0.466	0.326	1.744949885893e-80	4	Crsca11aG0110900
3.18219576580182e-84	0.899294550718763	0.541	0.407	1.48513076389971e-79	4	Crsca16aG0175200
1.69985625843947e-83	0.732376967304719	0.598	0.466	7.93322915813699e-79	4	Crsca15aG0004600
3.10686459510969e-83	0.889130310952954	0.47	0.329	1.44997370653769e-78	4	Crsca03aG0297700
1.39500631228975e-81	0.723448695961139	0.611	0.48	6.51049445945625e-77	4	CrscaPtG0002600
1.95176694853705e-79	1.21619497014266	0.334	0.198	9.10889634882242e-75	4	CrscaPtG0003000
6.42927124697278e-78	1.16821583839636	0.333	0.197	3.0005408909622e-73	4	Crsca04aG0231000
4.66175498750278e-77	0.48870701079404	0.793	0.745	2.17564105266755e-72	4	Crsca05aG0077800
5.20731807926129e-77	0.63039293344343	0.646	0.505	2.43025534759124e-72	4	Crsca11aG0065100
3.69333337125766e-74	1.09154679271525	0.387	0.254	1.72367868436595e-69	4	Crsca02aG0234000
7.39171625163166e-74	0.96556036953726	0.469	0.347	3.44971397463649e-69	4	Crsca02aG0133300
1.38397056858875e-73	0.665399880174728	0.641	0.58	6.45899064360369e-69	4	Crsca02aG0214400
4.43296397327718e-72	1.17259233463528	0.308	0.181	2.06886428632846e-67	4	Crsca15aG0110000
5.51969987446456e-71	0.559090158905843	0.645	0.512	2.57604393141261e-66	4	Crsca17aG0201400
1.48201427392864e-70	0.912981799204189	0.47	0.344	6.91656061642497e-66	4	Crsca05aG0102800
1.48678895674945e-69	0.914705192855038	0.473	0.357	6.93884406114968e-65	4	Crsca01aG0085900
7.51953901157986e-69	0.99828253892188	0.431	0.31	3.50936885670432e-64	4	Crsca03aG0256700
2.65338900343273e-67	0.97784006990537	0.356	0.228	1.23833664790206e-62	4	Crsca08aG0205400
5.82853068706674e-67	1.12794071426126	0.329	0.206	2.72017527165405e-62	4	Crsca08aG0198600
8.81249734973748e-65	0.982529089878861	0.34	0.214	4.11279251312248e-60	4	Crsca09aG0262500
2.07062064525911e-64	1.08758777993289	0.334	0.212	9.66358655142427e-60	4	CrscaPtG0004900
3.02579008076127e-64	0.974349457717792	0.395	0.276	1.41213623069129e-59	4	Crsca05aG0017200
4.60903521819183e-63	1.0481069058041	0.344	0.222	2.15103673633013e-58	4	Crsca03aG0160600
7.98811008486272e-63	0.535696943876724	0.634	0.52	3.72805097660543e-58	4	Crsca14aG0212300
1.74261481538314e-62	0.995375461644155	0.399	0.283	8.13278334339311e-58	4	Crsca11aG0263600
1.25284727031685e-59	0.460551389367893	0.728	0.663	5.84703821056875e-55	4	Crsca08aG0003200
1.12768296852105e-57	1.20752687012566	0.262	0.156	5.26289641408774e-53	4	Crsca08aG0240900
4.34347826086705e-57	0.797018897568047	0.416	0.295	2.02710130434665e-52	4	Crsca09aG0089100
1.49025519684059e-55	0.694841262868494	0.536	0.439	6.95502100365505e-51	4	Crsca11aG0160900
8.30507227468194e-55	0.83526539163058	0.389	0.275	3.87597723059406e-50	4	Crsca02aG0045300
1.4154113974519e-54	0.734039798932896	0.434	0.317	6.60572499190803e-50	4	Crsca13aG0083300
1.7310988955818e-53	0.841689057977024	0.379	0.266	8.07903854568028e-49	4	Crsca11aG0085400
1.95322516770412e-53	0.958413136744665	0.381	0.271	9.11570185767511e-49	4	Crsca08aG0240600
5.56368972420573e-53	1.18394465385141	0.273	0.169	2.59657399428682e-48	4	CrscaPtG0001200
8.00285843393526e-53	0.726351310604862	0.504	0.406	3.73493403111759e-48	4	Crsca13aG0126400
2.22941592636315e-52	0.677599851170648	0.47	0.365	1.04046841283368e-47	4	Crsca11aG0086000
3.14548941407875e-52	1.00081062139713	0.284	0.177	1.46799990955055e-47	4	Crsca02aG0214600
3.17042843247307e-51	0.904981226849914	0.388	0.279	1.47963894943518e-46	4	Crsca15aG0194800
4.94944011224813e-51	0.677438868002251	0.546	0.485	2.3099037003862e-46	4	Crsca10aG0237000
1.04674822278366e-49	0.929192972786817	0.326	0.217	4.88517395573136e-45	4	Crsca13aG0086600
3.65643361010485e-48	0.92701934626361	0.354	0.25	1.70645756583593e-43	4	Crsca13aG0027600
4.43595782180809e-48	0.89530353817465	0.391	0.29	2.07026151543783e-43	4	CrscaMtG0001400
6.89455126125914e-46	0.947416052256253	0.308	0.207	3.21768707362964e-41	4	Crsca11aG0016100
1.01357214956186e-45	1.03074910882777	0.3	0.2	4.73034122200519e-41	4	CrscaMtG0001500
3.36078469858121e-45	0.584576524061332	0.372	0.261	1.56847821882785e-40	4	Crsca17aG0233000
3.67617420573894e-45	0.791765835371471	0.408	0.305	1.71567050181836e-40	4	Crsca07aG0111300
6.64307227536608e-45	1.05020441936339	0.266	0.171	3.10032183091335e-40	4	Crsca08aG0198500
1.27814906533202e-44	0.761890583161113	0.401	0.304	5.96512168790453e-40	4	Crsca11aG0085900
1.38525591396698e-44	1.08284868036555	0.275	0.18	6.4649893504839e-40	4	Crsca09aG0206100
2.25996298945069e-44	0.831682543311057	0.397	0.295	1.05472472717664e-39	4	Crsca08aG0198900
3.26574895584474e-44	0.790899740250491	0.343	0.237	1.52412503769274e-39	4	Crsca08aG0194600
7.06463948209818e-44	0.689654614624644	0.512	0.427	3.29706724629522e-39	4	Crsca06aG0112600
1.55364613368433e-42	0.826899547337597	0.362	0.264	7.25086650590475e-38	4	Crsca05aG0092000
4.76800897993502e-42	0.920593096281765	0.337	0.24	2.22522979093567e-37	4	CrscaMtG0006400
1.02438223996167e-41	0.531903271768586	0.61	0.553	4.78079191390113e-37	4	Crsca02aG0335800
2.50697571803216e-41	0.796027388743387	0.427	0.339	1.17000556760561e-36	4	Crsca02aG0090400
7.00962633203492e-41	0.928539634219353	0.311	0.215	3.2713926091607e-36	4	Crsca14aG0027000
7.97309260994107e-41	0.59694970178675	0.522	0.434	3.7210423210595e-36	4	Crsca07aG0178700
1.78667312997053e-40	0.866285948694586	0.377	0.283	8.33840349757247e-36	4	Crsca06aG0239300
6.7312681721626e-40	0.611555028210705	0.322	0.223	3.14148285594829e-35	4	Crsca11aG0245400
1.32251168154008e-39	0.896026663875811	0.318	0.225	6.17216201774755e-35	4	Crsca03aG0090600
3.63851628341459e-39	0.990996628920622	0.257	0.168	1.69809554946959e-34	4	Crsca05aG0122700
5.51264700608829e-39	1.11546831076785	0.253	0.167	2.5727523577414e-34	4	Crsca05aG0193700
6.64886110819387e-39	0.901164693284296	0.296	0.204	3.10302347919408e-34	4	Crsca16aG0152100
6.43470129248978e-37	0.788195651171775	0.32	0.228	3.00307509320498e-32	4	Crsca08aG0198200
3.97633885549808e-36	0.873105270198696	0.31	0.221	1.85575734386095e-31	4	Crsca05aG0185400
5.78910255299056e-36	0.830867433476205	0.311	0.221	2.70177416148069e-31	4	Crsca08aG0050400
6.72921545041225e-36	0.650405232077687	0.48	0.409	3.1405248507074e-31	4	Crsca07aG0101700
3.06889933873436e-35	0.815007882924076	0.336	0.25	1.43225532138733e-30	4	Crsca05aG0092700
5.72509617209093e-35	0.698666675109243	0.449	0.371	2.67190238351483e-30	4	Crsca05aG0205800
7.66076761898587e-35	0.953322637283958	0.29	0.205	3.5752802477807e-30	4	Crsca10aG0010400
1.15377718883204e-34	0.842922068847238	0.339	0.253	5.38467814027912e-30	4	Crsca14aG0184900
1.81040691901922e-34	0.637739238106368	0.391	0.305	8.44916909106269e-30	4	Crsca05aG0092300
2.98253865055913e-34	0.964949066677639	0.255	0.174	1.39195078821595e-29	4	Crsca13aG0155000
5.32005760751192e-34	0.531645386283517	0.544	0.474	2.48287088542581e-29	4	Crsca14aG0222200
7.61044383124438e-34	0.809797242655936	0.329	0.242	3.55179413604175e-29	4	Crsca14aG0098300
9.46536829443575e-34	0.376988902995492	0.646	0.568	4.41748738301316e-29	4	Crsca13aG0028600
2.9240317911089e-33	0.686035491777385	0.34	0.249	1.36464563691053e-28	4	Crsca03aG0114200
3.49219214936108e-33	0.677226723601984	0.446	0.372	1.62980607610682e-28	4	Crsca02aG0208600
5.18603415204406e-33	0.959014112961464	0.253	0.172	2.42032213875896e-28	4	Crsca02aG0003200
1.56197612070908e-32	0.798488284512969	0.361	0.281	7.28974255534925e-28	4	Crsca01aG0013900
3.1838324889491e-32	0.68850164258733	0.314	0.227	1.48589462259255e-27	4	Crsca04aG0212200
6.81748413328116e-32	0.497391160687799	0.573	0.543	3.18171984500232e-27	4	Crsca16aG0054400
1.81070055383583e-31	0.532944814230969	0.414	0.327	8.4505394847518e-27	4	Crsca09aG0003400
5.58771105712294e-31	0.405635662335481	0.327	0.235	2.60778475035928e-26	4	Crsca02aG0024500
2.02324397357004e-30	0.734076846526002	0.367	0.289	9.44247962465136e-26	4	Crsca17aG0201100
2.16239995762703e-30	0.457042471170148	0.322	0.233	1.00919206022453e-25	4	Crsca17aG0208600
1.43797950136177e-29	0.795956640239017	0.315	0.238	6.71105033285539e-25	4	Crsca15aG0032400
3.13491627513311e-29	0.810059810946917	0.29	0.211	1.46306542560462e-24	4	Crsca05aG0181300
7.44604609212208e-29	0.864210355110852	0.307	0.229	3.47506971119338e-24	4	Crsca17aG0202700
1.21440467022535e-28	0.729454993227735	0.363	0.288	5.6676265959417e-24	4	Crsca17aG0015800
1.42904928266099e-28	0.869083609654214	0.291	0.216	6.66937300217885e-24	4	Crsca08aG0070100
7.34675778071746e-28	0.653241063729383	0.36	0.279	3.42873185626084e-23	4	Crsca08aG0183000
8.74263691150871e-28	0.768757508973546	0.279	0.202	4.08018864660111e-23	4	Crsca07aG0243100
2.89510157381488e-27	0.690783119979325	0.424	0.357	1.3511439044994e-22	4	Crsca11aG0193400
2.15285927556374e-26	0.791880398640971	0.291	0.217	1.0047394239056e-21	4	Crsca02aG0115100
2.29608849072913e-26	0.610862112010331	0.435	0.379	1.07158449862328e-21	4	Crsca11aG0085200
2.84046093640671e-26	0.820188099345113	0.3	0.227	1.32564311902101e-21	4	Crsca11aG0002800
6.62609103548837e-26	0.795558299959569	0.254	0.182	3.09239668626242e-21	4	Crsca09aG0034500
6.75728102552077e-25	0.671732376063056	0.39	0.323	3.15362305461054e-20	4	Crsca16aG0117000
9.5488549316758e-25	0.590867487365169	0.372	0.3	4.45645059661309e-20	4	Crsca01aG0089000
6.53488738979096e-24	0.520743052403942	0.396	0.333	3.04983194481544e-19	4	Crsca07aG0085300
1.69605655125906e-23	0.743647410357278	0.339	0.275	7.91549592472604e-19	4	Crsca04aG0100100
4.39395274115655e-23	0.798864304419821	0.271	0.205	2.05065774429776e-18	4	Crsca02aG0296600
4.5726506482081e-23	0.731425868697463	0.266	0.197	2.13405605751872e-18	4	Crsca10aG0185300
1.32540947849731e-22	0.545667995797122	0.493	0.446	6.18568603614695e-18	4	Crsca14aG0202600
4.12045721373933e-22	0.599615096079505	0.408	0.357	1.92301738165215e-17	4	Crsca05aG0093100
6.33281905325588e-21	0.736890477046567	0.289	0.225	2.95552665215452e-16	4	Crsca17aG0026900
6.33600213080929e-21	0.540821930926996	0.377	0.309	2.95701219444869e-16	4	Crsca08aG0231800
1.42513313103563e-20	0.406944401433293	0.543	0.497	6.65109632254327e-16	4	Crsca01aG0121600
3.15049328171132e-20	0.607576263422515	0.374	0.313	1.47033521457467e-15	4	Crsca08aG0170100
6.08927936258814e-20	0.269602861598547	0.482	0.427	2.84186667851988e-15	4	Crsca04aG0224100
1.54474581286243e-18	0.523607633085926	0.405	0.359	7.20932870862895e-14	4	Crsca11aG0084500
5.69944005137457e-18	0.680001128786215	0.291	0.233	2.65992867197651e-13	4	Crsca03aG0027000
8.53777884035738e-18	0.309112863118066	0.63	0.615	3.98458138479479e-13	4	Crsca05aG0142700
1.0891379821098e-17	0.730135036165427	0.253	0.198	5.08300696250645e-13	4	Crsca07aG0068300
1.34266796904257e-17	0.651158115649741	0.336	0.284	6.26623141152165e-13	4	Crsca14aG0189100
2.12461142195287e-17	0.705421448454181	0.286	0.23	9.91556150625403e-13	4	Crsca02aG0073800
7.66151095790764e-17	0.73344479502138	0.257	0.202	3.5756271640555e-12	4	Crsca14aG0022200
9.81156062135583e-17	0.669847469578683	0.26	0.204	4.57905534198677e-12	4	Crsca04aG0266600
3.68454729041194e-16	0.671173761234631	0.287	0.235	1.71957822043525e-11	4	Crsca07aG0002200
5.67277110869688e-16	0.64846675915793	0.348	0.305	2.64748227642883e-11	4	Crsca03aG0192000
8.9435069557999e-16	0.296194422136082	0.538	0.492	4.17393469627181e-11	4	Crsca04aG0224800
1.17782943612276e-15	0.639578276804497	0.315	0.265	5.49692997838493e-11	4	Crsca17aG0189400
1.5612949306602e-15	0.341845767977587	0.347	0.281	7.28656344139116e-11	4	Crsca02aG0324400
1.60340095171465e-15	0.340490632854116	0.297	0.239	7.48307224165226e-11	4	Crsca06aG0186700
1.85627426783739e-15	0.679244604137287	0.278	0.226	8.66323200799711e-11	4	Crsca01aG0009300
2.0726851062264e-15	0.588220199508022	0.277	0.222	9.67322139075861e-11	4	Crsca09aG0185700
3.6154719453547e-15	0.696381036308385	0.26	0.209	1.68734075689704e-10	4	Crsca04aG0047800
3.66825755051319e-15	0.653042684622761	0.27	0.218	1.7119757988245e-10	4	Crsca16aG0149800
5.71839513578566e-15	0.267844351094031	0.4	0.338	2.66877500987117e-10	4	Crsca03aG0215900
7.50382706078123e-15	0.672380547333897	0.272	0.222	3.5020360892666e-10	4	Crsca09aG0279100
9.838600463039e-15	0.449216231362791	0.415	0.367	4.5916748361003e-10	4	Crsca01aG0209600
1.7671562360679e-14	0.372095549464531	0.253	0.196	8.24731815372887e-10	4	Crsca11aG0090900
2.11426760517745e-14	0.493532237533553	0.255	0.202	9.86728691336315e-10	4	Crsca13aG0071800
2.65815371015733e-14	0.277581472375106	0.591	0.573	1.24056033653043e-09	4	Crsca02aG0154800
3.99340077184834e-14	0.72315145452616	0.274	0.227	1.86372014022162e-09	4	Crsca01aG0084300
6.39686532346117e-14	0.524111873768394	0.269	0.216	2.98541704645933e-09	4	Crsca16aG0192100
7.82604872373013e-14	0.432058103789779	0.428	0.395	3.65241693936485e-09	4	Crsca17aG0168100
9.85495208404201e-14	0.659977301464958	0.285	0.238	4.5993061376224e-09	4	Crsca09aG0236600
1.21503926980647e-13	0.622594457961195	0.315	0.269	5.67058827218681e-09	4	Crsca01aG0087600
1.3898312165583e-13	0.695930169097462	0.261	0.212	6.48634228767757e-09	4	Crsca02aG0281200
1.94523307996689e-13	0.482116855071534	0.399	0.356	9.07840278420548e-09	4	Crsca08aG0090400
2.67373626438574e-13	0.626093172093855	0.261	0.213	1.24783271458882e-08	4	Crsca15aG0030000
3.11838017749083e-13	0.494966158573403	0.292	0.243	1.45534802883497e-08	4	Crsca10aG0228300
8.66013447999874e-13	0.419550878054317	0.262	0.211	4.04168476181541e-08	4	Crsca14aG0165700
9.06797257953295e-13	0.480219923256216	0.361	0.316	4.23202280286803e-08	4	Crsca10aG0187400
9.11548131909032e-13	0.483093884989922	0.288	0.238	4.25419513161945e-08	4	Crsca09aG0183400
1.33524254261697e-12	0.588242944553439	0.32	0.279	6.23157694639338e-08	4	Crsca13aG0138900
1.53873859564404e-12	0.68148047965555	0.257	0.213	7.18129302587073e-08	4	Crsca04aG0151600
1.89069243823327e-12	0.652229860544109	0.267	0.224	8.82386160923466e-08	4	Crsca15aG0017100
2.01999942233945e-12	0.641908043142019	0.278	0.235	9.4273373040582e-08	4	Crsca16aG0154800
2.38287670636066e-12	0.663903205509226	0.255	0.209	1.11208855885852e-07	4	Crsca14aG0056200
4.00511773466028e-12	0.580785468435995	0.265	0.221	1.86918844676595e-07	4	Crsca05aG0027700
4.00682569743778e-12	0.504851531721682	0.409	0.377	1.86998555299421e-07	4	Crsca13aG0070200
4.08044364420166e-12	0.579024816328326	0.294	0.251	1.90434304874892e-07	4	Crsca06aG0013800
7.15435156707725e-12	0.535971214101778	0.288	0.242	3.33893587635495e-07	4	Crsca05aG0185600
7.48382347284064e-12	0.623055995988151	0.252	0.207	3.49270041477473e-07	4	Crsca15aG0165500
1.09981908076696e-11	0.380050317892226	0.448	0.417	5.1328556499394e-07	4	Crsca02aG0024300
1.56571369019334e-11	0.304620318201191	0.53	0.509	7.30718579213231e-07	4	Crsca09aG0143100
2.22725961316916e-11	0.62938916914779	0.254	0.211	1.03946206146605e-06	4	Crsca02aG0296700
3.39190793913624e-11	0.382905729890538	0.468	0.447	1.58300343519489e-06	4	Crsca11aG0094900
3.41626625092011e-11	0.348066113287013	0.472	0.447	1.59437145930441e-06	4	Crsca01aG0067100
3.79379077720993e-11	0.56518339761208	0.27	0.227	1.77056215572387e-06	4	Crsca09aG0213100
4.10420947929464e-11	0.508739768780167	0.332	0.293	1.91543456398681e-06	4	Crsca15aG0015000
5.49597779272286e-11	0.488897260205004	0.27	0.225	2.56497283586376e-06	4	Crsca04aG0175700
7.38786781925218e-11	0.43660928236986	0.427	0.402	3.44791791124499e-06	4	Crsca08aG0072900
9.10211126394538e-11	0.409653092260784	0.365	0.324	4.24795532688331e-06	4	Crsca03aG0036400
1.11130665918582e-10	0.546395898010188	0.255	0.214	5.18646817842022e-06	4	Crsca17aG0102300
1.18948850730905e-10	0.649495783863601	0.273	0.234	5.55134286361133e-06	4	Crsca10aG0129200
2.04753727329692e-10	0.518242372575245	0.339	0.303	9.5558564544767e-06	4	Crsca04aG0029100
2.9975824472127e-10	0.506861428551153	0.351	0.318	1.39897172811416e-05	4	Crsca11aG0261300
1.15259691171141e-09	0.337037198081345	0.443	0.41	5.37916978695717e-05	4	Crsca03aG0266300
1.32048308322671e-09	0.519937890892068	0.289	0.253	6.16269454941904e-05	4	Crsca01aG0011800
1.55998643402801e-09	0.53173548353731	0.31	0.275	7.28045668760874e-05	4	Crsca11aG0066500
1.79897135095738e-09	0.508820600775165	0.323	0.292	8.3957992949181e-05	4	Crsca04aG0016100
1.79908599313843e-09	0.575809231756907	0.266	0.229	8.39633432997707e-05	4	Crsca15aG0237700
2.139038642213e-09	0.386093696212453	0.439	0.415	9.98289334320808e-05	4	Crsca07aG0168000
2.68155390945416e-09	0.558562033966115	0.287	0.253	0.000125148120954226	4	Crsca06aG0272300
2.91195828162404e-09	0.536313219944017	0.29	0.256	0.000135901093003394	4	Crsca08aG0230800
5.05012664526947e-09	0.386451475413632	0.27	0.229	0.000235689410534726	4	Crsca03aG0245500
5.28976164244693e-09	0.269204882091473	0.324	0.28	0.000246873175852998	4	Crsca03aG0075600
8.03482101018741e-09	0.417831877935757	0.388	0.362	0.000374985096545446	4	Crsca12aG0129100
8.63112388816071e-09	0.589426718065738	0.273	0.241	0.000402814551860461	4	Crsca15aG0149200
1.46329687540348e-08	0.410307592100982	0.371	0.344	0.000682920651750805	4	Crsca09aG0111500
1.58598265299945e-08	0.475817817756032	0.353	0.33	0.000740178104154842	4	Crsca04aG0009900
1.59504967622887e-08	0.448773283432685	0.285	0.249	0.000744409683896015	4	Crsca11aG0204000
2.83349880515325e-08	0.256203675874942	0.343	0.301	0.00132239389236502	4	Crsca17aG0101600
3.14551736192778e-08	0.483041852020123	0.256	0.22	0.0014680129528117	4	Crsca13aG0171700
4.94882148809469e-08	0.468542996636706	0.311	0.28	0.00230961498849379	4	Crsca17aG0116800
6.5947471561661e-08	0.502799681454902	0.277	0.243	0.00307776849778272	4	Crsca15aG0194000
7.05778446839652e-08	0.440792213079575	0.376	0.358	0.00329386801140066	4	Crsca04aG0124100
7.85021083200628e-08	0.559267072331104	0.27	0.24	0.00366369339529733	4	Crsca03aG0183400
1.17817947301355e-07	0.444548811714747	0.325	0.297	0.00549856360055424	4	Crsca12aG0148200
1.45387996892432e-07	0.461979060147805	0.31	0.281	0.0067852578149698	4	Crsca03aG0231000
5.09127699294722e-07	0.42705930622892	0.34	0.315	0.0237609897260847	4	Crsca10aG0245000
5.94045578021774e-07	0.331599050597663	0.317	0.287	0.0277241071262762	4	Crsca06aG0199200
1.94042231311794e-06	0.314902060204787	0.268	0.234	0.0905595093532142	4	Crsca12aG0040800
2.07497154377405e-06	0.401565485522366	0.336	0.313	0.0968389219479351	4	Crsca01aG0270700
3.7542661516688e-06	0.330572568524825	0.375	0.354	0.175211601298383	4	Crsca08aG0068200
5.32925510649125e-06	0.451445274750602	0.258	0.23	0.248716335819947	4	Crsca03aG0311000
9.34899781766196e-06	0.480641234001172	0.271	0.246	0.436317728150284	4	Crsca16aG0094200
2.24796567376215e-05	0.251353126376412	0.342	0.312	1	4	Crsca15aG0005400
2.87385786675913e-05	0.363518622946191	0.326	0.308	1	4	Crsca05aG0072400
5.2768451582682e-05	0.385632808863461	0.273	0.25	1	4	Crsca04aG0240000
5.51731867980006e-05	0.408271385337074	0.312	0.296	1	4	Crsca17aG0137200
6.61364019801629e-05	0.446826360401839	0.313	0.299	1	4	Crsca01aG0301600
6.63055663389733e-05	0.322114723217351	0.324	0.305	1	4	Crsca10aG0237700
8.38302039722872e-05	0.431989763656153	0.259	0.238	1	4	Crsca16aG0155300
0.000133640157152558	0.299562642754921	0.34	0.321	1	4	Crsca03aG0155400
0.000146135706930498	0.27849646901221	0.259	0.235	1	4	Crsca12aG0156400
0.000161608112448527	0.268455813950795	0.373	0.355	1	4	Crsca12aG0092600
0.00024865049880785	0.27650135367288	0.368	0.357	1	4	Crsca17aG0005400
0.000744496247628939	0.356229844580074	0.315	0.301	1	4	Crsca15aG0210800
0.000911399211202169	0.310099389493075	0.27	0.25	1	4	Crsca16aG0214400
0.00132581539887076	0.332860268371953	0.354	0.35	1	4	Crsca16aG0065200
0.00138565344792328	0.410640035691939	0.258	0.244	1	4	Crsca08aG0197200
0.00147048285977761	0.282653307153146	0.362	0.353	1	4	Crsca01aG0035800
0.00153642076363272	0.29494204689011	0.358	0.354	1	4	Crsca11aG0099000
0.00212336133464106	0.294439355720535	0.33	0.318	1	4	Crsca14aG0208100
0.00447952898382295	0.320635283495333	0.295	0.283	1	4	Crsca04aG0130600
0.00612749708422012	0.27269004176006	0.357	0.353	1	4	Crsca09aG0186600
0.00731339666704365	0.367441526527324	0.269	0.259	1	4	Crsca02aG0311300
0.00910310741375064	0.357812737325082	0.266	0.255	1	4	Crsca16aG0092600
0	3.66803252573571	0.906	0.211	0	5	Crsca17aG0208600
0	3.52077361699117	0.891	0.214	0	5	Crsca02aG0024500
0	3.3662584130033	0.905	0.242	0	5	Crsca17aG0233000
0	3.51763665028208	0.825	0.173	0	5	Crsca11aG0090900
0	3.40768340539939	0.848	0.204	0	5	Crsca11aG0245400
0	2.8696685019893	0.935	0.323	0	5	Crsca02aG0134300
0	2.87091	0.786	0.21	0	5	Crsca04aG0212200
0	2.64952185607972	0.888	0.319	0	5	Crsca03aG0215900
0	2.69544995028472	0.822	0.261	0	5	Crsca02aG0045300
0	2.68229745433286	0.811	0.252	0	5	Crsca11aG0085400
0	2.5398972833342	0.873	0.317	0	5	Crsca03aG0297700
0	3.43485447655842	0.643	0.092	0	5	Crsca02aG0311200
0	2.57279373375287	0.901	0.35	0	5	Crsca11aG0086000
0	2.63489929941194	0.84	0.289	0	5	Crsca05aG0092300
0	3.51944540929974	0.651	0.102	0	5	Crsca16aG0131000
0	2.28472310781973	0.769	0.25	0	5	Crsca05aG0092000
0	5.26380468131856	0.541	0.024	0	5	Crsca01aG0161400
0	2.1690925892487	0.938	0.421	0	5	Crsca17aG0136000
0	2.21479983983232	0.799	0.284	0	5	Crsca01aG0089000
0	2.27463452488181	0.799	0.291	0	5	Crsca11aG0085900
0	2.27600996930649	0.77	0.265	0	5	Crsca05aG0017200
0	2.85615047747457	0.63	0.135	0	5	Crsca07aG0241900
0	2.24092635480949	0.83	0.342	0	5	Crsca11aG0084500
0	2.39144441069936	0.672	0.195	0	5	Crsca11aG0016100
0	2.13527868915036	0.696	0.238	0	5	Crsca05aG0092700
0	2.0617451100145	0.793	0.342	0	5	Crsca05aG0093100
0	4.01599372879456	0.52	0.071	0	5	Crsca11aG0245500
0	2.74297056484455	0.548	0.105	0	5	Crsca05aG0009300
0	1.86832020655699	0.694	0.251	0	5	Crsca09aG0198800
0	1.94531285343353	0.796	0.365	0	5	Crsca11aG0085200
0	3.20050252616669	0.494	0.064	0	5	Crsca03aG0118600
0	2.83628994990014	0.538	0.115	0	5	Crsca15aG0137900
0	3.1470771574381	0.481	0.076	0	5	Crsca06aG0267200
0	2.80243244638613	0.514	0.111	0	5	Crsca12aG0095300
0	3.52599225292354	0.448	0.052	0	5	Crsca05aG0020800
0	2.59316039874435	0.493	0.108	0	5	Crsca05aG0127600
0	2.87088874556475	0.43	0.068	0	5	Crsca15aG0142600
0	2.57699128391343	0.465	0.111	0	5	Crsca11aG0018400
0	3.13267594969846	0.377	0.053	0	5	Crsca01aG0247400
0	3.54595986450504	0.33	0.039	0	5	Crsca17aG0133800
0	3.01653596430802	0.328	0.042	0	5	Crsca03aG0311100
0	3.49233233803058	0.313	0.031	0	5	Crsca15aG0235600
0	3.06964896643562	0.326	0.046	0	5	Crsca04aG0007800
0	2.80401175869557	0.327	0.049	0	5	Crsca15aG0025900
0	3.03768557144585	0.318	0.041	0	5	Crsca12aG0051100
0	2.97443651319265	0.314	0.042	0	5	Crsca17aG0057600
0	2.99026205353885	0.314	0.052	0	5	Crsca05aG0021200
0	2.90359836912922	0.303	0.043	0	5	Crsca05aG0152000
0	2.75246102323184	0.305	0.048	0	5	Crsca09aG0142200
0	2.88939592359335	0.3	0.046	0	5	Crsca10aG0053300
0	3.60573682519892	0.264	0.022	0	5	Crsca01aG0039100
0	3.02419365643194	0.273	0.035	0	5	Crsca11aG0136800
0	3.45184658202249	0.259	0.027	0	5	Crsca11aG0010000
0	3.00292592960494	0.267	0.036	0	5	Crsca04aG0234900
1.67982319586024e-322	2.29177605218118	0.487	0.127	7.83973485507973e-318	5	Crsca11aG0197200
3.07324246561406e-317	1.86303480961721	0.655	0.224	1.43428225870208e-312	5	Crsca09aG0183400
9.75107055573829e-313	2.15768220516674	0.387	0.082	4.55082462836306e-308	5	Crsca08aG0208700
2.45779423078838e-291	3.25849670867237	0.258	0.041	1.14705256750894e-286	5	Crsca01aG0091400
3.19461208510076e-275	2.10566514927786	0.439	0.116	1.49092546011653e-270	5	Crsca09aG0011800
3.56371073144116e-274	2.11894458055296	0.412	0.103	1.66318379836359e-269	5	Crsca17aG0152100
1.1499846758484e-270	2.56677220445606	0.252	0.041	5.36697848218448e-266	5	Crsca05aG0023600
3.30287360140169e-268	2.58260070131074	0.262	0.045	1.54145110977417e-263	5	Crsca17aG0026400
5.86320799394262e-267	1.5299536596849	0.752	0.342	2.73635917077302e-262	5	Crsca04aG0124100
8.14682843869992e-261	1.73840694222917	0.533	0.168	3.80212483234125e-256	5	Crsca09aG0267500
3.1695599936392e-242	2.17486437756777	0.317	0.069	1.47923364903141e-237	5	Crsca06aG0154200
2.02420621963394e-237	2.20500442623545	0.308	0.067	9.44697042703158e-233	5	Crsca08aG0085000
1.28630318959582e-233	1.12944931334592	0.894	0.594	6.00317698584371e-229	5	Crsca01aG0161500
1.26447880749775e-225	1.13909359916623	0.667	0.251	5.90132259459199e-221	5	Crsca09aG0113200
4.00980862868018e-221	2.05584944666422	0.28	0.059	1.87137768700504e-216	5	Crsca14aG0212100
2.51419608866516e-213	1.40286743079752	0.708	0.331	1.17337531458003e-208	5	Crsca09aG0198700
6.31233250816977e-208	2.08135674654346	0.277	0.06	2.94596558156283e-203	5	Crsca02aG0090800
1.63054076835858e-202	1.91748026390396	0.349	0.094	7.60973376592947e-198	5	Crsca12aG0277400
1.72387122073411e-197	1.75449474438138	0.388	0.113	8.04530698716609e-193	5	Crsca04aG0322500
7.12250203127923e-197	1.03421355493107	0.993	0.828	3.32407169799802e-192	5	CrscaPtG0004600
7.46034651081483e-191	1.98676568431734	0.283	0.067	3.48174371659728e-186	5	Crsca06aG0105400
1.21252542941287e-178	1.86947812753551	0.292	0.073	5.65885617906987e-174	5	Crsca01aG0114200
4.41840770359839e-169	1.58209174716516	0.33	0.093	2.06207087526937e-164	5	Crsca07aG0251300
1.2634693721652e-168	1.05338282853356	0.693	0.323	5.89661155989498e-164	5	Crsca02aG0003100
9.7237260472305e-167	1.06172800121276	0.843	0.491	4.53806294624247e-162	5	CrscaMtG0005800
8.39524713269452e-165	1.96832837405353	0.259	0.064	3.91806183682853e-160	5	Crsca01aG0057000
7.25394600215682e-161	1.32072409286351	0.47	0.172	3.38541659920659e-156	5	Crsca05aG0011900
5.95480911625029e-159	1.42459675846925	0.407	0.139	2.77910941455401e-154	5	Crsca06aG0058600
3.36742782367802e-153	1.29199499041961	0.467	0.176	1.57157856531053e-148	5	Crsca09aG0034500
1.9696264988002e-152	1.73012000150073	0.28	0.076	9.19224686990053e-148	5	Crsca04aG0130300
1.02207454875437e-149	1.33772912884265	0.413	0.146	4.77002191903663e-145	5	Crsca12aG0270200
1.60576620610515e-147	1.39094997999759	0.381	0.129	7.49411088389275e-143	5	Crsca02aG0207100
9.23168337001144e-146	0.820307796056456	0.861	0.508	4.30842662878434e-141	5	Crsca17aG0201400
2.86215979950964e-144	1.33212610209342	0.42	0.154	1.33576997843115e-139	5	Crsca17aG0014300
4.17761375741729e-143	0.954556105972288	0.828	0.533	1.94969234058665e-138	5	Crsca16aG0054400
2.25522346799042e-141	1.29608484413333	0.411	0.149	1.05251279251113e-136	5	Crsca12aG0007300
2.18383543552333e-140	0.981804647774907	0.672	0.323	1.01919599775874e-135	5	Crsca07aG0085300
9.62915750415082e-140	1.41421976699061	0.388	0.139	4.49392780718719e-135	5	Crsca14aG0117000
1.39187051741643e-137	1.78675896667658	0.27	0.078	6.49585970478246e-133	5	Crsca16aG0163500
1.55057074686722e-137	0.902337628629554	0.728	0.368	7.23651367562932e-133	5	Crsca14aG0225400
1.20387396782396e-135	1.53421823907066	0.308	0.096	5.61847980783442e-131	5	Crsca03aG0273400
3.00901496189717e-135	1.31962208041322	0.46	0.184	1.40430728271741e-130	5	Crsca04aG0009700
1.48044773591041e-134	1.1048299978558	0.741	0.455	6.90924958349388e-130	5	Crsca01aG0235200
5.79544195979323e-133	1.61319594693647	0.283	0.085	2.7047327626355e-128	5	Crsca06aG0286000
6.92245819055178e-132	1.33077912280968	0.347	0.118	3.23071123753051e-127	5	Crsca06aG0151000
3.85448166093417e-131	1.75945818542639	0.254	0.072	1.79888659115798e-126	5	Crsca15aG0149000
1.80047826450631e-129	1.07252058291283	0.45	0.176	8.40283206045097e-125	5	Crsca03aG0161500
6.79956954656747e-127	1.28867963570711	0.417	0.163	3.17335910738304e-122	5	Crsca16aG0180500
4.18549838611103e-126	0.999829484109684	0.557	0.249	1.95337209679802e-121	5	CrscaPtG0001000
8.33106655484683e-126	1.58808974639394	0.256	0.074	3.88810876114702e-121	5	Crsca14aG0208500
1.09991700606003e-125	1.16317705228279	0.456	0.187	5.13331266728217e-121	5	Crsca10aG0197500
7.97988714964747e-125	1.10923135382088	0.501	0.216	3.72421333274048e-120	5	Crsca04aG0175700
1.07501872496176e-123	1.45963617363269	0.305	0.1	5.01711238939654e-119	5	Crsca15aG0122700
1.11164176944435e-123	0.989041909989488	0.561	0.258	5.18803213799679e-119	5	Crsca04aG0280400
1.35107248286002e-123	0.874563797549121	0.752	0.42	6.30545527750772e-119	5	CrscaPtG0003900
1.295330971644e-122	1.07005190414033	0.468	0.196	6.04530964466256e-118	5	Crsca01aG0113400
9.90737854222827e-120	1.10477657086869	0.415	0.163	4.62377356565793e-115	5	Crsca13aG0096100
1.48398579297526e-117	1.12703429587047	0.422	0.17	6.92576169581553e-113	5	Crsca13aG0184000
5.62355035109045e-117	1.26886697276348	0.341	0.122	2.62451094885391e-112	5	Crsca04aG0190800
3.8224094764431e-115	1.34520099390067	0.3	0.101	1.78391850265599e-110	5	Crsca10aG0010800
4.00731640472187e-112	0.766266998771105	0.938	0.716	1.8702145660837e-107	5	CrscaPtG0002400
4.82296387994011e-112	0.960766160393533	0.417	0.167	2.25087724276805e-107	5	CrscaPtG0001200
1.11643876136966e-110	1.13455128993276	0.418	0.174	5.21041969931219e-106	5	Crsca02aG0224000
1.3785347700017e-109	1.33230533099682	0.283	0.094	6.43362177159795e-105	5	Crsca10aG0193300
2.02254419411001e-108	0.802528444272158	0.614	0.302	9.43921375391141e-104	5	Crsca08aG0231800
6.09615103475845e-107	1.31679884283115	0.322	0.118	2.84507368792177e-102	5	Crsca09aG0168600
4.92252708575286e-106	1.17495336702536	0.379	0.152	2.29734339092086e-101	5	Crsca07aG0258400
7.46431219261523e-106	1.11885476744554	0.551	0.276	3.48359450029353e-101	5	Crsca09aG0203800
1.39470385980322e-105	0.769536923475165	0.647	0.327	6.50908291370165e-101	5	Crsca02aG0188200
1.3168233642666e-104	0.918729724603694	0.476	0.211	6.14561464103222e-100	5	Crsca14aG0182500
1.65341444387e-104	0.650789619949478	0.868	0.547	7.7164852095413e-100	5	CrscaPtG0003100
1.14944112059093e-103	1.11955	0.362	0.142	5.36444170979785e-99	5	Crsca04aG0276000
1.42515520342229e-103	1.10835850096986	0.346	0.133	6.65119933437184e-99	5	Crsca03aG0210800
3.29434697865402e-103	1.27444729972904	0.325	0.121	1.53747173493783e-98	5	Crsca13aG0186500
1.65789380703707e-102	0.910135604410669	0.485	0.22	7.73739039744202e-98	5	Crsca03aG0335400
2.99490009118722e-102	0.756031588813165	0.733	0.418	1.39771987255707e-97	5	CrscaMtG0000900
1.57731188552756e-100	1.03567180426571	0.362	0.142	7.36131456975711e-96	5	Crsca08aG0262000
1.61432591171927e-99	0.897274205064085	0.568	0.286	7.53405902999382e-95	5	CrscaMtG0001400
2.69597818182023e-99	1.09085268941151	0.333	0.127	1.2582130174555e-94	5	Crsca16aG0227300
2.72382538878321e-97	0.698340310704569	0.567	0.273	1.27120930894513e-92	5	Crsca05aG0083000
3.02572809469955e-97	1.11783182650927	0.354	0.141	1.41210730179628e-92	5	Crsca12aG0038600
1.23545967330286e-96	1.2873349893305	0.263	0.09	5.76589029530443e-92	5	Crsca06aG0128300
1.30941860689987e-94	1.20726991514188	0.301	0.112	6.11105663840167e-90	5	Crsca16aG0072000
2.19350813504106e-93	1.12828418799618	0.353	0.144	1.02371024662366e-88	5	Crsca16aG0143500
5.33747570851545e-93	0.616683148166281	0.79	0.444	2.49099991316416e-88	5	Crsca03aG0115700
5.74219977997502e-93	0.89974636272008	0.41	0.177	2.67988463731434e-88	5	Crsca04aG0062500
2.64681175909125e-92	1.1841821405989	0.323	0.127	1.23526704796789e-87	5	Crsca09aG0180000
6.81107194843967e-91	1.08692593639025	0.303	0.114	3.17872727833679e-86	5	Crsca03aG0238300
6.16944876932166e-90	0.852153377743085	0.399	0.172	2.87928174064242e-85	5	Crsca08aG0092400
8.35815917623927e-90	1.25269940351559	0.273	0.1	3.90075288755087e-85	5	Crsca06aG0125500
3.29664229537932e-89	1.00991002746435	0.309	0.118	1.53854295925353e-84	5	Crsca03aG0261900
7.39874631649878e-86	0.923020379499237	0.388	0.17	3.45299490590998e-81	5	Crsca11aG0040900
2.33372370897916e-85	0.743344551187517	0.504	0.247	1.08914885498058e-80	5	CrscaPtG0004800
5.89110494541379e-85	0.536295881520997	0.955	0.812	2.74937867802462e-80	5	Crsca02aG0254100
1.87080962455612e-84	0.637114547108278	0.719	0.412	8.7310685178034e-80	5	Crsca12aG0070100
3.22432337497239e-84	0.814753337942685	0.412	0.184	1.50479171909961e-79	5	Crsca14aG0000800
4.11991076963476e-83	0.895057712462996	0.393	0.176	1.92276235618854e-78	5	Crsca04aG0236100
4.51948174690526e-83	0.846261906908458	0.457	0.22	2.10924213128068e-78	5	Crsca06aG0201900
3.66624070196217e-82	0.797451667923647	0.449	0.213	1.71103453560575e-77	5	Crsca13aG0171700
5.43678902813984e-82	0.710831022225991	0.518	0.26	2.53734943943287e-77	5	Crsca16aG0183400
1.35585566197025e-81	0.606630246872225	0.651	0.347	6.32777837441517e-77	5	Crsca15aG0099700
2.37795899089542e-81	0.99820015295402	0.288	0.111	1.10979346105089e-76	5	Crsca04aG0015800
4.82568328735023e-81	1.15882879936105	0.255	0.093	2.25214639020635e-76	5	Crsca15aG0046800
3.52616666121501e-80	0.766575938557561	0.486	0.238	1.64566198078905e-75	5	Crsca02aG0187500
5.08246308610081e-80	0.607952142957106	0.797	0.505	2.37198552228325e-75	5	Crsca11aG0065100
6.3866380103272e-79	0.421920147026071	0.943	0.62	2.98064395941971e-74	5	CrscaPtG0000100
1.02560293354087e-78	1.08795485447899	0.26	0.097	4.78648889083523e-74	5	Crsca17aG0210100
1.01729319299259e-77	0.570698033565309	0.528	0.265	4.74770733169642e-73	5	Crsca16aG0095100
1.92859515296414e-77	1.10469142729381	0.267	0.102	9.00075357888366e-73	5	Crsca07aG0192900
3.80606163585459e-77	1.02149985514189	0.301	0.123	1.77628896545334e-72	5	Crsca10aG0198300
3.89042491856016e-77	0.737362893280482	0.425	0.199	1.81566130949203e-72	5	CrscaPtG0005100
2.38601883160645e-76	0.703779653444672	0.559	0.299	1.11355498871073e-71	5	Crsca09aG0169100
2.56646415642499e-76	0.838212517669548	0.506	0.267	1.19776882180354e-71	5	Crsca11aG0066500
6.57935390126259e-76	1.04993063260386	0.327	0.141	3.07058446571925e-71	5	Crsca08aG0006400
1.07027958584421e-75	1.01897023244061	0.373	0.173	4.99499482713494e-71	5	Crsca10aG0064100
1.44692469010123e-75	0.765237641240254	0.421	0.199	6.75279752870245e-71	5	CrscaMtG0001500
1.35065185564581e-74	0.905431628683682	0.356	0.158	6.303492210299e-70	5	Crsca05aG0163000
1.71664587828113e-74	0.640273945143514	0.749	0.479	8.01158631393801e-70	5	Crsca10aG0237000
3.41865770072536e-74	0.663230686380107	0.559	0.303	1.59548754892853e-69	5	Crsca09aG0153900
4.63756407642743e-74	1.02532683770992	0.252	0.095	2.16435115446868e-69	5	Crsca10aG0031400
3.06190457973874e-73	0.975222003493286	0.352	0.16	1.42899086736407e-68	5	Crsca09aG0200600
1.14028815296189e-72	0.665311495486264	0.459	0.226	5.32172480987312e-68	5	Crsca08aG0198200
3.37956608333814e-72	0.980443058748739	0.301	0.127	1.57724349109391e-67	5	Crsca02aG0141100
3.43875525171427e-72	1.04512602711564	0.251	0.096	1.60486707597505e-67	5	CrscaPtG0004400
1.23856752656974e-71	0.84852957626462	0.334	0.146	5.78039464650097e-67	5	Crsca12aG0205300
2.39277348759599e-71	0.954045806544416	0.3	0.126	1.11670738666105e-66	5	Crsca11aG0060600
2.80658506993314e-71	1.10875	0.256	0.101	1.30983325213779e-66	5	Crsca12aG0180400
4.54937304113302e-71	0.630977104067388	0.526	0.275	2.12319239829678e-66	5	Crsca08aG0183000
5.05512611788119e-71	0.776922036021136	0.386	0.181	2.35922735921515e-66	5	Crsca04aG0044300
1.42781810068004e-70	0.517110136640372	0.624	0.345	6.66362707587374e-66	5	Crsca06aG0049500
1.63800093878575e-70	1.03180058682778	0.276	0.113	7.64455038131312e-66	5	Crsca10aG0050600
2.1248164624964e-70	0.408746420724154	0.733	0.414	9.91651843047072e-66	5	Crsca09aG0210600
6.18608952006825e-70	0.916964462434234	0.307	0.132	2.88704797901585e-65	5	Crsca10aG0234600
1.04828932843321e-69	0.422922445086697	0.813	0.508	4.89236629579781e-65	5	CrscaPtG0002800
2.89044988272081e-69	0.800328260701773	0.377	0.176	1.3489729602658e-64	5	Crsca17aG0006800
4.96834376896604e-69	0.813323988032831	0.304	0.129	2.31872603697645e-64	5	Crsca13aG0124500
5.00898222909911e-69	0.933239952005411	0.302	0.131	2.33769200632056e-64	5	Crsca04aG0103600
1.03491827695523e-68	0.454704649353411	0.692	0.402	4.82996359855006e-64	5	Crsca15aG0006700
2.64336243795893e-68	0.986978909495978	0.266	0.108	1.23365724979543e-63	5	Crsca15aG0054500
1.27682822772541e-67	0.526103403739244	0.587	0.315	5.95895733879449e-63	5	Crsca13aG0083300
1.65417624992191e-67	0.814658730957211	0.349	0.161	7.72004055838557e-63	5	Crsca01aG0187400
2.53467997278371e-67	0.965487868263922	0.275	0.114	1.18293514329816e-62	5	Crsca01aG0013500
4.97418577092226e-67	0.90765140672011	0.305	0.133	2.32145249928942e-62	5	Crsca13aG0110200
1.07766434688706e-66	0.597313247604535	0.587	0.327	5.02945950692191e-62	5	Crsca02aG0317000
1.50294574989615e-66	0.664180119530628	0.41	0.201	7.01424781476532e-62	5	Crsca11aG0215800
4.82316764039869e-66	1.02896319699289	0.256	0.104	2.25097233777407e-61	5	Crsca14aG0038400
5.79934716160157e-66	0.639908016886258	0.409	0.201	2.70655532031945e-61	5	CrscaPtG0003000
7.90314170616276e-66	0.770012004328665	0.364	0.172	3.68839623426616e-61	5	Crsca17aG0139900
1.0286000169269e-65	0.815645099272126	0.37	0.177	4.80047627899786e-61	5	Crsca02aG0036400
1.66393382048819e-65	0.969563086256262	0.267	0.111	7.76557914021836e-61	5	Crsca13aG0057400
1.76530692863722e-65	0.781983317268514	0.42	0.211	8.23868743594993e-61	5	Crsca16aG0192100
7.53658160475095e-65	0.928770194800189	0.289	0.125	3.51732263493727e-60	5	Crsca17aG0124400
8.22738356189887e-65	0.651454307797168	0.439	0.224	3.8397199083382e-60	5	Crsca11aG0002800
1.05370465967709e-64	0.885441066514569	0.289	0.125	4.917639646713e-60	5	Crsca02aG0086500
1.83919963003352e-64	0.918686161823981	0.337	0.159	8.58354467336643e-60	5	Crsca07aG0085000
2.39522844753157e-64	0.826880558318515	0.301	0.133	1.11785311646298e-59	5	Crsca13aG0093000
6.44521097082543e-64	0.704644557990742	0.359	0.169	3.00797996008423e-59	5	Crsca09aG0021900
8.87460357555665e-64	0.87474952294041	0.305	0.136	4.14177748871229e-59	5	Crsca04aG0288500
1.24500131534827e-63	0.883954643587516	0.313	0.141	5.81042113873039e-59	5	Crsca16aG0129200
3.43284780539113e-63	0.762269823050412	0.279	0.118	1.60211007077604e-58	5	Crsca11aG0063300
3.73098813446097e-63	0.852504022245954	0.286	0.124	1.74125216235293e-58	5	Crsca13aG0123800
4.64284185081913e-63	0.857916606132102	0.299	0.132	2.16681429177729e-58	5	Crsca05aG0127800
6.19125294065988e-63	0.796445590977316	0.348	0.164	2.88945774740596e-58	5	Crsca11aG0155100
9.70897860687804e-63	0.655386362114996	0.487	0.259	4.53118031582998e-58	5	Crsca14aG0112800
1.3361429513198e-62	1.01207449503918	0.26	0.109	6.23577915380953e-58	5	Crsca13aG0141400
3.85428212290027e-62	0.626997424122536	0.455	0.237	1.79879346675756e-57	5	Crsca08aG0194600
5.09505213110227e-62	0.741887481971585	0.344	0.161	2.37786082958543e-57	5	Crsca12aG0078800
5.41896803280072e-62	0.977387789894147	0.252	0.104	2.5290323809081e-57	5	Crsca14aG0189700
9.81508700286458e-61	0.802806678496763	0.339	0.16	4.5807011042369e-56	5	Crsca13aG0119400
1.10596695427591e-60	0.768808333310372	0.374	0.184	5.16154777560568e-56	5	Crsca02aG0321000
1.25932917445125e-60	0.516931741697368	0.57	0.316	5.87728925716397e-56	5	Crsca04aG0002900
1.43063480042164e-60	1.03569242784204	0.254	0.107	6.6767726135678e-56	5	Crsca10aG0222300
3.25359495630412e-60	0.70389930100228	0.36	0.172	1.51845276610713e-55	5	Crsca13aG0155000
4.67187707757929e-60	0.772524539907261	0.278	0.121	2.18036503210625e-55	5	Crsca10aG0189600
7.50613297863414e-60	0.727985895722666	0.322	0.149	3.50311226112855e-55	5	Crsca09aG0218300
8.2936080194959e-60	0.932209668596728	0.259	0.11	3.87062686269874e-55	5	Crsca09aG0181300
8.34797873701728e-60	0.72813853974757	0.32	0.147	3.89600167656596e-55	5	Crsca07aG0080200
8.87470100189293e-60	0.880363327885314	0.322	0.151	4.14182295758343e-55	5	Crsca12aG0049500
2.14421603491483e-59	0.455680707432855	0.669	0.385	1.00070562349475e-54	5	Crsca17aG0168100
2.23526999286673e-59	0.659287403940628	0.385	0.19	1.0432005056709e-54	5	Crsca12aG0043900
3.45902196840714e-59	0.880051400063279	0.259	0.111	1.61432555265561e-54	5	Crsca16aG0054500
4.51553678612565e-59	0.84879106934244	0.295	0.133	2.10740101808484e-54	5	Crsca04aG0302700
1.35798295833806e-58	0.435883412351053	0.487	0.257	6.33770646656372e-54	5	Crsca03aG0166100
1.42142800386738e-58	0.332331151387445	0.998	0.704	6.63380449404907e-54	5	CrscaPtG0002900
2.69513467357005e-58	0.769344542652573	0.37	0.183	1.25781935215514e-53	5	Crsca01aG0059000
6.81405404559394e-58	0.735443239382028	0.336	0.161	3.18011902307869e-53	5	Crsca01aG0197700
1.32505857772033e-57	0.753090018590658	0.325	0.154	6.18404838222078e-53	5	Crsca14aG0013900
2.50560617219938e-57	0.662444596953923	0.404	0.207	1.16936640056545e-52	5	Crsca04aG0246400
2.61793523095786e-57	0.781160944674387	0.325	0.156	1.22179037228803e-52	5	Crsca12aG0090000
3.88565905405394e-57	0.710053036535475	0.373	0.188	1.81343708052697e-52	5	Crsca09aG0216800
6.63318951919633e-57	0.600413232950096	0.429	0.224	3.09570954860893e-52	5	Crsca03aG0160600
1.03015034074398e-56	0.586181526422247	0.405	0.208	4.80771164025214e-52	5	Crsca08aG0198600
1.50738669081628e-56	0.673137512792105	0.321	0.15	7.03497368603958e-52	5	Crsca06aG0198000
1.75597779454828e-56	0.662330734543904	0.477	0.264	8.19514836715683e-52	5	Crsca02aG0191500
3.72892876524428e-56	0.75729389391382	0.342	0.167	1.7402910547395e-51	5	Crsca05aG0193700
4.32708750750739e-56	0.856438778846885	0.291	0.133	2.0194517397537e-51	5	Crsca05aG0055200
9.84763703802478e-56	0.86572529731616	0.255	0.111	4.59589220564616e-51	5	Crsca07aG0175900
4.51510328737672e-55	0.6897206717944	0.286	0.129	2.10719870421872e-50	5	Crsca16aG0164100
5.61441724340924e-55	0.733679050226866	0.345	0.171	2.62024852749909e-50	5	Crsca01aG0154600
6.1949092244512e-55	0.519626783384861	0.443	0.233	2.89116413505137e-50	5	Crsca09aG0236600
9.7276183105265e-55	0.843235463899853	0.293	0.137	4.53987946552272e-50	5	Crsca04aG0182100
1.12159875356993e-54	0.532049482607932	0.436	0.23	5.23450138291085e-50	5	Crsca08aG0205400
1.14550303423365e-54	0.724594379234502	0.326	0.157	5.34606266076843e-50	5	Crsca05aG0153000
4.39808449319657e-54	0.893742481515987	0.283	0.131	2.05258603297484e-49	5	Crsca11aG0028500
7.42880979072326e-54	0.624320646670046	0.314	0.148	3.46702552933054e-49	5	Crsca05aG0079000
1.25757484580174e-53	0.801338029615573	0.315	0.152	5.86910180535672e-49	5	Crsca03aG0227900
6.91964150374999e-53	0.57760235137958	0.533	0.313	3.22939668980012e-48	5	Crsca11aG0168600
1.04177113443418e-52	0.527543720712124	0.715	0.481	4.86194588440431e-48	5	CrscaPtG0002600
1.26738111261484e-52	0.83647232964456	0.256	0.113	5.91486765257346e-48	5	Crsca02aG0072900
1.74852789512328e-52	0.555864190580777	0.486	0.273	8.16037968654037e-48	5	Crsca17aG0116800
4.15213662944056e-52	0.838325257168719	0.254	0.113	1.93780216495991e-47	5	Crsca12aG0034400
4.29366677458085e-52	0.638015597723369	0.408	0.218	2.00385428369688e-47	5	Crsca06aG0224200
5.92639742953345e-52	0.577136667821225	0.412	0.218	2.76584968036326e-47	5	Crsca13aG0086600
1.18424280565237e-51	0.621466814237631	0.363	0.185	5.52686117397962e-47	5	Crsca03aG0071300
1.42687954589879e-51	0.621939531211799	0.383	0.199	6.65924684070967e-47	5	Crsca01aG0024500
1.54416780586229e-51	0.67468352583842	0.307	0.147	7.20663114995931e-47	5	CrscaPtG0004000
3.10108309222698e-51	0.725771837873182	0.267	0.122	1.44727547914233e-46	5	Crsca07aG0098800
3.61655840065984e-51	0.756606736889298	0.311	0.151	1.68784780558795e-46	5	Crsca11aG0000800
5.5350811666918e-51	0.826608391863834	0.259	0.118	2.58322238049506e-46	5	Crsca12aG0208200
8.55125987828348e-51	0.364030385547193	0.8	0.524	3.9908729851949e-46	5	CrscaPtG0003200
1.41166960657386e-50	0.386650550224925	0.514	0.288	6.58826205388022e-46	5	CrscaPtG0002300
1.75355964729394e-50	0.72987156332258	0.263	0.12	8.1838628739208e-46	5	Crsca10aG0008800
3.52034835258953e-50	0.597866235898539	0.436	0.24	1.64294657615354e-45	5	CrscaMtG0006400
3.77884685809485e-50	0.779993348799162	0.291	0.139	1.76358782867287e-45	5	Crsca17aG0057500
3.96243666216583e-50	0.381573639650014	0.53	0.295	1.84926919023279e-45	5	Crsca17aG0101600
4.05405022949747e-50	0.620651005821634	0.301	0.144	1.89202524210647e-45	5	Crsca08aG0253300
4.0639677941357e-50	0.568141183867856	0.388	0.204	1.89665376952313e-45	5	Crsca16aG0095800
8.52873146014069e-50	0.365028246183618	0.527	0.296	3.98035897244766e-45	5	CrscaPtG0000700
1.00787341564183e-49	0.687287162434796	0.333	0.168	4.70374523080041e-45	5	Crsca13aG0000100
1.41631256775756e-49	0.71387792446124	0.282	0.133	6.60993075372452e-45	5	Crsca03aG0142400
5.38507705162154e-49	0.627195747445222	0.267	0.123	2.51321545999177e-44	5	Crsca14aG0032300
7.22045545203855e-49	0.767337140566017	0.287	0.138	3.36978655946639e-44	5	Crsca14aG0003100
7.77660216272527e-49	0.797331526740021	0.278	0.132	3.62934022934388e-44	5	Crsca06aG0016700
9.67322075152898e-49	0.720675445192014	0.328	0.166	4.51449212473858e-44	5	Crsca04aG0301800
1.25324682789222e-48	0.669014264913414	0.275	0.129	5.84890294577301e-44	5	Crsca11aG0011700
1.7688646338857e-48	0.767147268769352	0.252	0.115	8.25529124634457e-44	5	Crsca04aG0327800
1.92204930957979e-48	0.781135678783356	0.251	0.114	8.9702041278089e-44	5	Crsca09aG0139900
2.17442942410827e-48	0.657872905934642	0.312	0.155	1.01480621223133e-43	5	Crsca17aG0126500
2.20178933370638e-48	0.713180688795466	0.291	0.14	1.02757508204077e-43	5	Crsca04aG0198100
3.91105480190076e-48	0.523916761820995	0.404	0.216	1.82528927604708e-43	5	Crsca17aG0097000
5.24903914360529e-48	0.636318907762993	0.36	0.188	2.44972656832059e-43	5	Crsca12aG0240400
7.10866074231223e-48	0.568983492777592	0.357	0.183	3.31761196843712e-43	5	Crsca16aG0096000
1.24482316579643e-47	0.548900101310751	0.441	0.247	5.80958971477192e-43	5	Crsca06aG0272300
1.50965196880418e-47	0.676556362066199	0.336	0.172	7.04554573840911e-43	5	Crsca04aG0230100
1.81370836107073e-47	0.746432032816822	0.272	0.13	8.46457692111708e-43	5	Crsca15aG0106900
4.49355643397302e-47	0.669581323299286	0.278	0.133	2.09714278773521e-42	5	Crsca04aG0255700
1.25137986470959e-46	0.463313978097377	0.388	0.206	5.84018982859967e-42	5	CrscaPtG0003600
1.36445006233717e-46	0.537963992101064	0.409	0.223	6.36788844092758e-42	5	Crsca01aG0009300
1.84143226852199e-46	0.314743388772021	0.502	0.277	8.59396439719211e-42	5	Crsca02aG0324400
2.93470145012365e-46	0.796571985559801	0.257	0.121	1.36962516677271e-41	5	Crsca12aG0123500
3.04477734360507e-46	0.724707063043656	0.288	0.141	1.42099758626049e-41	5	Crsca04aG0204800
3.06411741213561e-46	0.693716624620316	0.267	0.126	1.43002359624369e-41	5	Crsca06aG0127500
3.08622489689647e-46	0.432895286159293	0.528	0.305	1.44034115938158e-41	5	Crsca15aG0005400
4.8575283558582e-46	0.402747510048764	0.476	0.268	2.26700848367902e-41	5	Crsca01aG0272300
4.87188019515301e-46	0.58088639290681	0.357	0.188	2.27370648707791e-41	5	Crsca12aG0193300
5.66936293661029e-46	0.582488671520735	0.31	0.155	2.64589168251602e-41	5	Crsca02aG0041500
6.42513824234518e-46	0.671377827832165	0.285	0.138	2.9986120177025e-41	5	Crsca14aG0093300
6.74609387822278e-46	0.605293303016771	0.296	0.146	3.14840201296657e-41	5	Crsca12aG0056600
9.22222195320286e-46	0.571638253221124	0.331	0.17	4.30401098555977e-41	5	Crsca09aG0277400
1.29039669556142e-45	0.467669198137953	0.519	0.305	6.02228137818516e-41	5	Crsca17aG0115100
1.46314236725556e-45	0.647834907053164	0.351	0.186	6.82848542798169e-41	5	Crsca14aG0078400
2.80643009234072e-45	0.65136956447744	0.354	0.189	1.30976092409541e-40	5	Crsca16aG0226300
3.39034460740786e-45	0.570212414456978	0.361	0.191	1.58227382827725e-40	5	Crsca02aG0331600
3.4892132465668e-45	0.753807351004381	0.279	0.137	1.62841582217273e-40	5	Crsca02aG0176400
4.93803943008372e-45	0.704328974142157	0.254	0.119	2.30458300202007e-40	5	Crsca15aG0205300
5.91950780846455e-45	0.598857351836896	0.349	0.184	2.7626342942104e-40	5	Crsca07aG0116600
1.32326276390776e-44	0.682965138875573	0.31	0.159	6.17566731915751e-40	5	Crsca01aG0175000
4.92184613309596e-44	0.398937646792142	0.421	0.231	2.29702559031589e-39	5	Crsca03aG0010300
6.47140399312356e-44	0.376675699209116	0.413	0.224	3.02020424359077e-39	5	Crsca03aG0245500
6.71375121896539e-44	0.354900333527433	0.4	0.214	3.13330769389115e-39	5	CrscaPtG0004900
7.1347672892849e-44	0.806681085938263	0.261	0.127	3.32979589390926e-39	5	Crsca06aG0152500
8.27856039649243e-44	0.701543344145195	0.289	0.145	3.86360413704301e-39	5	Crsca09aG0212100
9.38510935557235e-44	0.513962413335422	0.402	0.223	4.38003053624562e-39	5	Crsca03aG0048200
1.35373304918478e-43	0.589858098402763	0.33	0.172	6.31787214054537e-39	5	Crsca07aG0132700
2.10877532865496e-43	0.555176801216616	0.384	0.211	9.8416544588327e-39	5	Crsca03aG0117700
2.68818157696363e-43	0.538212023382698	0.379	0.206	1.25457434196893e-38	5	Crsca09aG0258600
4.12917150368832e-43	0.650549427367149	0.272	0.133	1.92708434077134e-38	5	Crsca10aG0179600
4.59648528070358e-43	0.561754806447896	0.393	0.218	2.14517968050436e-38	5	Crsca09aG0167500
6.53350099979656e-43	0.46675421797354	0.431	0.244	3.04918491660505e-38	5	Crsca16aG0214400
8.70665675903899e-43	0.676376606678009	0.286	0.143	4.06339670944349e-38	5	Crsca03aG0305600
1.23389139272972e-42	0.66372000105121	0.264	0.129	5.75857112986961e-38	5	Crsca07aG0070200
1.23456290703601e-42	0.703643749992424	0.275	0.136	5.76170508713705e-38	5	Crsca11aG0072300
1.42341375813183e-42	0.259661155794036	0.538	0.312	6.64307200920125e-38	5	Crsca02aG0292100
3.39010878855611e-42	0.622959903499852	0.283	0.141	1.58216377161914e-37	5	Crsca05aG0077400
4.21476092904919e-42	0.471897855790954	0.39	0.215	1.96702892558726e-37	5	Crsca08aG0070100
4.57805349786803e-42	0.451309130400869	0.404	0.225	2.13657756745501e-37	5	Crsca07aG0105600
5.29548553019707e-42	0.447356836414154	0.398	0.221	2.47140309694297e-37	5	Crsca08aG0050400
9.58494032833627e-42	0.654233265923307	0.256	0.124	4.47329165123454e-37	5	Crsca14aG0028800
9.9177592524695e-42	0.579779416267029	0.295	0.149	4.62861824312752e-37	5	CrscaMtG0003600
2.66258166606585e-41	0.601245292018621	0.278	0.139	1.24262686355293e-36	5	Crsca12aG0193400
4.14453562069607e-41	0.508092721593745	0.395	0.221	1.93425477417885e-36	5	Crsca02aG0002000
4.46756852666161e-41	0.601750408280055	0.337	0.181	2.08501423139297e-36	5	Crsca09aG0206100
6.48446187916166e-41	0.42180972118356	0.488	0.29	3.02629835900475e-36	5	Crsca11aG0208800
9.67949675585634e-41	0.521308205129709	0.372	0.205	4.51742113595816e-36	5	Crsca07aG0223800
1.41820637931237e-40	0.384985184838602	0.575	0.358	6.61876917225084e-36	5	Crsca05aG0002400
1.69214865419313e-40	0.446134802201178	0.395	0.221	7.89725776911932e-36	5	Crsca05aG0185400
2.11365529512762e-40	0.623455298564342	0.292	0.151	9.86442926236062e-36	5	Crsca12aG0263000
2.56783725182582e-40	0.438785498322316	0.352	0.189	1.19840964542711e-35	5	Crsca11aG0117100
2.98937962262673e-40	0.764902037246145	0.261	0.13	1.3951434698799e-35	5	Crsca16aG0118500
3.34180753672181e-40	0.684626043926147	0.256	0.126	1.55962157738807e-35	5	Crsca05aG0097400
3.61612179303994e-40	0.557361127054478	0.359	0.198	1.68764404081174e-35	5	Crsca04aG0217700
3.7032823734448e-40	0.617676545892971	0.283	0.144	1.72832188368669e-35	5	Crsca04aG0246600
3.81348806908371e-40	0.501570016736171	0.397	0.225	1.77975488184137e-35	5	Crsca15aG0237700
6.20759693130513e-40	0.594700972168819	0.312	0.165	2.8970854878401e-35	5	Crsca07aG0256200
7.49918712152648e-40	0.566507001455049	0.288	0.148	3.49987062961641e-35	5	Crsca10aG0024000
8.76124116630559e-40	0.357474366813111	0.367	0.201	4.08887125231482e-35	5	Crsca04aG0231000
1.34096682201733e-39	0.640113455839146	0.284	0.146	6.25829215835488e-35	5	Crsca13aG0253800
1.60025993128276e-39	0.568725479986674	0.306	0.161	7.46841309929666e-35	5	Crsca10aG0003900
1.82198372351149e-39	0.473884527455375	0.367	0.203	8.50319803762813e-35	5	Crsca14aG0097800
3.03598942356121e-39	0.581505398215573	0.273	0.138	1.41689626397602e-34	5	Crsca05aG0038200
5.56340159222926e-39	0.601689109099573	0.306	0.161	2.5964395230934e-34	5	Crsca17aG0114300
1.06399662930826e-38	0.589276790651068	0.265	0.133	4.96567226898163e-34	5	Crsca08aG0017800
1.62264132710457e-38	0.679679077423291	0.25	0.124	7.57286707359701e-34	5	Crsca04aG0001300
1.82958528345941e-38	0.487400537158825	0.295	0.153	8.53867451790506e-34	5	CrscaMtG0006100
2.30451922180817e-38	0.535160492629756	0.311	0.165	1.07551912081787e-33	5	Crsca02aG0294500
2.72896618614571e-38	0.489629493668769	0.433	0.255	1.2736085190742e-33	5	Crsca05aG0174800
3.99705300144568e-38	0.618265759034287	0.261	0.131	1.8654246357747e-33	5	Crsca11aG0121100
5.52524481354719e-38	0.657569558698134	0.255	0.128	2.57863175448247e-33	5	Crsca15aG0220900
6.10732417149159e-38	0.580633474801257	0.305	0.163	2.85028819083512e-33	5	Crsca07aG0230400
1.22935930611352e-37	0.593772401997521	0.278	0.144	5.7374198816318e-33	5	Crsca03aG0209400
1.2666418873165e-37	0.621432493199056	0.278	0.145	5.91141768810612e-33	5	Crsca13aG0036600
1.2976592504619e-37	0.543228424811206	0.267	0.136	6.05617572190568e-33	5	Crsca08aG0248700
1.72710675013151e-37	0.421433167199581	0.341	0.184	8.06040720286375e-33	5	Crsca04aG0021500
[truncated: 4,026 more rows]

## Sheet: Supplemental Table S2
Supplemental Table S2. Maker Gene Information Table used for cell subset annotation
Cell_type	Gene_ID	Gene symbol	Cluster
leaf mesophyll cells	Crsca08aG0038800	AT5G38410 (RBCS)	0, 4
	CrscaPtG0002200	ATCG00340 (PSAB)
	Crsca16aG0152100	AT2G40100 (LHCB)
	Crsca04aG0332200	AT1G76110
leaf pavement cells	Crsca12aG0101600	AT5G04530	2, 7
	Crsca07aG0225700	AT1G68530
	Crsca10aG0208000	AT2G26250
	Crsca08aG0189300	AT1G05230
	Crsca13aG0133600	AT2G42840
	Crsca04aG0293800	AT2G26250
leaf guard cells	Crsca04aG0293800	AT2G26250	11
	Crsca04aG0005700	AT3G24140
	Crsca13aG0002900	AT3G26744
phloem parenchyma cells	Crsca06aG0101400	AT5G43810	3,10
	Crsca01aG0100700	AT1G15380
	Crsca01aG0210100	AT1G21830
	Crsca15aG0188200	AT3G01280
	Crsca09aG0182500	AT1G15380
companion cells	Crsca17aG0247600	AT5G16530	13
	Crsca02aG0095700	AT1G10155
sieve elements	Crsca02aG0180900	AT3G22400	15
	Crsca15aG0050700	AT4G19050
xylem cells	Crsca05aG0093600	AT5G03510	1, 8, 12
	Crsca10aG0189000	AT5G12020
	Crsca07aG0086600	AT1G04240
	Crsca14aG0093300	AT5G63530
	Crsca16aG0137100	AT2G39700
	Crsca04aG0044800	AT3G54420
metaxylem cells	Crsca07aG0156100	AT1G27440	14, 9
	Crsca17aG0171700	AT2G38320
	Crsca01aG0251900	AT1G09890
	Crsca09aG0122400	AT4G00230
meristematic cells	Crsca03aG0118600	AT3G19050	5, 6
	Crsca11aG0245500	AT1G08880
	Crsca13aG0116200	AT5G48310
	Crsca09aG0185300	AT5G66230

## Sheet: Supplemental Table S3
Supplemental Table S3. Distribution of integrated cell types across hawthorn leaf samples, showing conserved cell-type composition and similar abundance trends among species
	MC	XY	PC	PP	MER	MXY	GC	CC	SE
C. pinnatifida Nucleus	7685	672	701	669	703	118	82	11	33
C. pinnatifida Protoplast	1305	2784	1707	758	7	393	100	81	12
C. scabrifolia Nucleus	4205	1134	1392	1371	1717	78	47	28	36
C. scabrifolia Protoplast	1508	1636	820	272	6	158	25	35	3

## Sheet: Supplemental Table S4
Supplemental Table S4. Summary of upregulated differentially expressed genes across hawthorn leaf cell types
p_val	avg_log2FC	pct.1	pct.2	p_val_adj	gene	cell_type
0	2.03613229718193	0.721	0.298	0	Crsca03aG0331200	XY
0	2.11085688187348	0.842	0.419	0	Crsca12aG0024400	XY
0	2.24952638158831	0.629	0.212	0	Crsca07aG0197500	XY
0	2.29838835569381	0.664	0.247	0	Crsca17aG0206500	XY
0	2.08530479451123	0.645	0.232	0	Crsca02aG0293200	XY
0	2.7355565890125	0.617	0.21	0	Crsca09aG0277300	XY
0	2.05629371559767	0.678	0.275	0	Crsca13aG0119300	XY
0	2.14348954519543	0.847	0.451	0	Crsca11aG0259500	XY
0	2.29285918176297	0.792	0.401	0	Crsca04aG0214200	XY
0	1.91612975946718	0.746	0.356	0	Crsca17aG0175900	XY
0	1.85438836585078	0.655	0.279	0	Crsca01aG0088500	XY
0	1.76411363622203	0.61	0.243	0	Crsca07aG0050800	XY
0	1.53251206003958	0.703	0.336	0	Crsca15aG0033100	XY
0	1.82822028257436	0.671	0.306	0	Crsca11aG0055800	XY
0	1.97488854126075	0.59	0.225	0	Crsca17aG0136500	XY
0	2.42895747634569	0.567	0.204	0	Crsca09aG0270000	XY
0	2.54311143326784	0.496	0.134	0	Crsca07aG0057000	XY
0	2.13702585851188	0.527	0.169	0	Crsca03aG0304500	XY
0	1.72731257134368	0.593	0.238	0	Crsca16aG0149600	XY
0	1.82524598721737	0.666	0.312	0	Crsca17aG0140200	XY
0	2.3096954035639	0.502	0.149	0	Crsca07aG0160200	XY
0	1.38182882657126	0.779	0.427	0	Crsca04aG0002300	XY
0	2.21411790957352	0.638	0.289	0	Crsca16aG0205100	XY
0	2.07739753541225	0.5	0.151	0	Crsca14aG0125800	XY
0	1.82262310867822	0.57	0.225	0	Crsca12aG0094000	XY
0	2.66757512615984	0.459	0.115	0	Crsca15aG0144900	XY
0	1.60447588205043	0.794	0.453	0	Crsca11aG0121800	XY
0	0.832809529607678	0.662	0.324	0	Crsca16aG0139100	XY
0	2.33650721638311	0.487	0.15	0	Crsca04aG0189800	XY
0	1.76507807109003	0.587	0.25	0	Crsca04aG0270600	XY
0	2.67158088282209	0.432	0.1	0	Crsca10aG0059200	XY
0	2.47460882603024	0.447	0.116	0	Crsca06aG0173000	XY
0	1.32272451363629	0.696	0.366	0	Crsca11aG0121900	XY
0	2.25571572283904	0.512	0.183	0	Crsca14aG0038900	XY
0	2.3532029997724	0.5	0.171	0	Crsca12aG0029100	XY
0	1.90962497828124	0.521	0.194	0	Crsca09aG0077400	XY
0	2.3059601036804	0.467	0.141	0	Crsca01aG0197000	XY
0	1.48238922389508	0.758	0.432	0	Crsca09aG0240300	XY
0	2.20566601837529	0.467	0.143	0	Crsca05aG0098500	XY
0	1.88977917662187	0.66	0.339	0	Crsca14aG0140200	XY
0	2.16772353533149	0.496	0.175	0	Crsca16aG0209400	XY
0	1.93844903910094	0.828	0.507	0	Crsca04aG0318700	XY
0	1.45513603728149	0.673	0.354	0	Crsca04aG0143400	XY
0	1.40326556245037	0.635	0.317	0	Crsca01aG0244300	XY
0	2.3664832757899	0.439	0.123	0	Crsca09aG0033900	XY
0	1.85987172552152	0.516	0.201	0	Crsca16aG0132900	XY
0	1.65522489964313	0.552	0.24	0	Crsca06aG0128600	XY
0	1.29874154655578	0.67	0.359	0	Crsca13aG0157800	XY
0	1.5400156002806	0.589	0.278	0	Crsca10aG0173000	XY
0	1.57952170839729	0.555	0.247	0	Crsca08aG0096800	XY
0	2.1667973319787	0.549	0.241	0	Crsca17aG0127100	XY
0	2.34556810441312	0.418	0.112	0	Crsca01aG0010600	XY
0	2.52799300705195	0.425	0.119	0	Crsca03aG0299300	XY
0	1.51704259744559	0.551	0.246	0	Crsca05aG0150200	XY
0	1.59404029954307	0.602	0.3	0	Crsca03aG0089700	XY
0	1.72793720614044	0.479	0.18	0	Crsca03aG0049900	XY
0	1.41523274263983	0.498	0.201	0	Crsca07aG0130200	XY
0	1.08215688143067	0.589	0.294	0	Crsca02aG0139700	XY
0	2.24725648102469	0.435	0.142	0	Crsca01aG0295900	XY
0	2.77558634909417	0.465	0.172	0	Crsca10aG0189000	XY
0	1.59797653327784	0.474	0.181	0	Crsca04aG0334200	XY
0	1.25015253957075	0.683	0.391	0	Crsca10aG0171700	XY
0	1.92002049358596	0.425	0.133	0	Crsca13aG0238100	XY
0	1.82934519825497	0.489	0.198	0	Crsca01aG0092200	XY
0	1.06248366731803	0.746	0.456	0	Crsca10aG0055600	XY
0	1.60415047508569	0.491	0.201	0	Crsca13aG0005800	XY
0	1.12968588299059	0.575	0.287	0	Crsca12aG0163100	XY
0	1.42383824164455	0.872	0.585	0	Crsca07aG0130000	XY
0	2.75918880650449	0.373	0.088	0	Crsca16aG0209800	XY
0	2.21205989235849	0.39	0.106	0	Crsca16aG0200700	XY
0	2.16551470014889	0.464	0.181	0	Crsca10aG0189100	XY
0	2.56219655861966	0.4	0.119	0	Crsca10aG0188800	XY
0	1.61211723731249	0.554	0.274	0	Crsca17aG0133600	XY
0	1.84773759783606	0.559	0.28	0	Crsca08aG0086500	XY
0	1.52478861884662	0.48	0.203	0	Crsca08aG0118300	XY
0	2.11827524638315	0.381	0.105	0	Crsca10aG0058300	XY
0	2.13023645707284	0.425	0.15	0	Crsca12aG0084300	XY
0	2.16213815594599	0.396	0.123	0	Crsca11aG0184300	XY
0	1.4820986001738	0.684	0.412	0	Crsca09aG0215700	XY
0	2.18767887384836	0.427	0.155	0	Crsca04aG0165200	XY
0	1.93859373873357	0.616	0.345	0	Crsca10aG0188900	XY
0	1.24095074759062	0.62	0.349	0	Crsca15aG0126700	XY
0	3.01809336725942	0.352	0.083	0	Crsca02aG0236300	XY
0	1.0786030366985	0.733	0.464	0	Crsca14aG0012400	XY
0	1.98317072089053	0.42	0.152	0	Crsca01aG0083200	XY
0	1.41320939232223	0.585	0.318	0	Crsca10aG0150000	XY
0	1.52837357426813	0.448	0.182	0	Crsca07aG0064000	XY
0	1.7959968850861	0.403	0.137	0	Crsca13aG0160300	XY
0	2.47410131809958	0.356	0.091	0	Crsca01aG0256200	XY
0	1.40023465368201	0.454	0.189	0	Crsca02aG0014900	XY
0	1.55134455210832	0.451	0.187	0	Crsca15aG0018500	XY
0	0.715575121859881	0.442	0.179	0	Crsca04aG0324900	XY
0	2.39400915198004	0.356	0.093	0	Crsca14aG0179400	XY
0	1.24898954997034	0.611	0.35	0	Crsca13aG0099000	XY
0	1.44567736641491	0.481	0.222	0	Crsca08aG0021100	XY
0	1.64239017655193	0.397	0.139	0	Crsca12aG0288700	XY
0	1.55135930295193	0.514	0.257	0	Crsca11aG0189200	XY
0	1.48235631492286	0.555	0.299	0	Crsca03aG0056900	XY
0	1.25959218635002	0.545	0.289	0	Crsca07aG0209000	XY
0	1.8394846879843	0.541	0.286	0	Crsca11aG0040400	XY
0	1.9075625843679	0.399	0.144	0	Crsca07aG0043700	XY
0	2.42174476547764	0.348	0.093	0	Crsca07aG0191600	XY
0	2.62540691432905	0.344	0.09	0	Crsca03aG0215200	XY
0	1.59389617416841	0.582	0.331	0	Crsca04aG0023200	XY
0	2.35588277075315	0.331	0.081	0	Crsca07aG0138200	XY
0	1.26183598559445	0.447	0.199	0	Crsca06aG0260000	XY
0	1.20095310562747	0.409	0.161	0	Crsca13aG0121500	XY
0	1.67526772916736	0.385	0.138	0	Crsca16aG0180600	XY
0	1.51363	0.386	0.141	0	Crsca09aG0195700	XY
0	1.0548575172675	0.643	0.398	0	Crsca04aG0219600	XY
0	1.65115568350938	0.453	0.21	0	Crsca13aG0121700	XY
0	2.06691404344641	0.344	0.101	0	Crsca03aG0298400	XY
0	1.20390805026117	0.7	0.458	0	Crsca01aG0207200	XY
0	1.54002804704769	0.445	0.204	0	Crsca16aG0210600	XY
0	1.30514780430689	0.502	0.261	0	Crsca01aG0027100	XY
0	1.45341553428005	0.863	0.622	0	Crsca12aG0069800	XY
0	2.02066138908294	0.357	0.116	0	Crsca14aG0227000	XY
0	1.7769117375994	0.476	0.236	0	Crsca05aG0037900	XY
0	2.1118594193485	0.352	0.112	0	Crsca08aG0255400	XY
0	2.04345679180903	0.36	0.12	0	Crsca09aG0217800	XY
0	1.27457203574431	0.547	0.309	0	Crsca11aG0263700	XY
0	1.97233936956844	0.358	0.121	0	Crsca15aG0116400	XY
0	2.14477423684371	0.39	0.154	0	Crsca12aG0020300	XY
0	2.73986884559892	0.292	0.056	0	Crsca02aG0057600	XY
0	1.17827246112329	0.584	0.348	0	Crsca09aG0006000	XY
0	2.54689114221784	0.298	0.063	0	Crsca04aG0272900	XY
0	2.45941394838757	0.31	0.075	0	Crsca08aG0255200	XY
0	1.42406807634575	0.479	0.244	0	Crsca12aG0084600	XY
0	1.38888540019344	0.506	0.271	0	Crsca13aG0122100	XY
0	1.33549334553563	0.45	0.217	0	Crsca13aG0067600	XY
0	2.0582105424531	0.323	0.09	0	Crsca15aG0117300	XY
0	1.45644968599406	0.421	0.188	0	Crsca06aG0050900	XY
0	2.06929645316206	0.364	0.132	0	Crsca13aG0230400	XY
0	2.22020873887845	0.318	0.087	0	Crsca01aG0025800	XY
0	1.97997313640592	0.328	0.099	0	Crsca12aG0253200	XY
0	1.94213342136101	0.356	0.128	0	Crsca12aG0144400	XY
0	1.94466504108408	0.323	0.097	0	Crsca06aG0141700	XY
0	1.40809461319442	0.372	0.146	0	Crsca12aG0013100	XY
0	2.53400370050419	0.317	0.091	0	Crsca16aG0145200	XY
0	0.709001877164582	0.781	0.557	0	Crsca02aG0126600	XY
0	2.43731207649753	0.291	0.067	0	Crsca13aG0122200	XY
0	2.0917438466634	0.315	0.092	0	Crsca04aG0301200	XY
0	1.6740079206721	0.348	0.125	0	Crsca09aG0239900	XY
0	1.41500542437565	0.435	0.213	0	Crsca04aG0241300	XY
0	1.56792645137826	0.374	0.152	0	Crsca14aG0110600	XY
0	2.66299395822071	0.296	0.074	0	Crsca08aG0056100	XY
0	1.07236821018552	0.718	0.497	0	Crsca11aG0029900	XY
0	2.99001440039717	0.274	0.054	0	Crsca17aG0151600	XY
0	2.0993830690054	0.361	0.141	0	Crsca02aG0220100	XY
0	2.83440630058461	0.279	0.06	0	Crsca05aG0093600	XY
0	2.60489763921117	0.276	0.057	0	Crsca07aG0163300	XY
0	1.71970422161116	0.355	0.137	0	Crsca11aG0136700	XY
0	2.3033779048453	0.298	0.08	0	Crsca13aG0229300	XY
0	1.7059564094952	0.331	0.115	0	Crsca03aG0189900	XY
0	1.83453964381495	0.361	0.145	0	Crsca13aG0091900	XY
0	1.53929945786931	0.336	0.121	0	Crsca09aG0077500	XY
0	1.80765738576941	0.337	0.123	0	Crsca04aG0321500	XY
0	2.49657918808376	0.277	0.063	0	Crsca07aG0217500	XY
0	1.81169732294055	0.314	0.101	0	Crsca14aG0088700	XY
0	0.898445700759757	0.786	0.575	0	Crsca15aG0078600	XY
0	2.41057	0.287	0.076	0	Crsca12aG0071300	XY
0	1.88122855925487	0.317	0.107	0	Crsca03aG0336200	XY
0	1.46701595811646	0.334	0.124	0	Crsca09aG0108000	XY
0	1.51432723444122	0.86	0.65	0	Crsca15aG0003400	XY
0	2.59998999169561	0.273	0.064	0	Crsca01aG0116500	XY
0	1.63483601882204	0.338	0.129	0	Crsca14aG0116200	XY
0	2.0768017556499	0.303	0.094	0	Crsca08aG0255500	XY
0	1.93418090936736	0.289	0.081	0	Crsca16aG0154700	XY
0	2.12498630035894	0.289	0.082	0	Crsca05aG0040800	XY
0	1.51806013122254	0.321	0.115	0	Crsca06aG0164300	XY
0	1.63619365557354	0.333	0.128	0	Crsca13aG0236700	XY
0	2.27146	0.288	0.083	0	Crsca07aG0130500	XY
0	1.55065512558219	0.313	0.109	0	Crsca02aG0104300	XY
0	3.02322648421064	0.257	0.053	0	Crsca10aG0079800	XY
0	1.88133858962795	0.279	0.075	0	Crsca17aG0003900	XY
0	1.67925339116725	0.316	0.113	0	Crsca03aG0092400	XY
0	1.55933902232036	0.325	0.125	0	Crsca08aG0005200	XY
0	1.56167088344807	0.327	0.127	0	Crsca17aG0212900	XY
0	1.93018042407549	0.294	0.094	0	Crsca14aG0097000	XY
0	2.33741343385418	0.259	0.06	0	Crsca01aG0018800	XY
0	2.20191007501834	0.27	0.071	0	Crsca06aG0141600	XY
0	2.46793836631981	0.258	0.059	0	Crsca06aG0141800	XY
0	1.51184741013583	0.321	0.124	0	Crsca11aG0065700	XY
0	1.71718823673962	0.286	0.09	0	Crsca12aG0079900	XY
0	2.02335329441045	0.269	0.079	0	Crsca02aG0332900	XY
0	1.82022392446727	0.274	0.084	0	Crsca03aG0244400	XY
0	2.08979157448243	0.268	0.078	0	Crsca14aG0125400	XY
0	2.09916360209612	0.288	0.098	0	Crsca06aG0120900	XY
0	2.39495798803207	0.252	0.064	0	Crsca06aG0192900	XY
0	1.74858656292877	0.284	0.096	0	Crsca01aG0084700	XY
0	2.19141460862167	0.253	0.072	0	Crsca02aG0016500	XY
0	1.98329408950435	0.271	0.091	0	Crsca08aG0255600	XY
0	2.14675079248032	0.25	0.072	0	Crsca04aG0052200	XY
0	0.879996003785127	0.838	0.66	0	Crsca17aG0138700	XY
1.08813017840076e-319	1.65498883260747	0.339	0.142	5.07830354259635e-315	Crsca08aG0026100	XY
4.66553106286931e-318	1.41940729145237	0.368	0.158	2.17740334704111e-313	Crsca17aG0116000	XY
1.53973483450712e-317	1.59398752766431	0.315	0.122	7.18594247264473e-313	Crsca04aG0287000	XY
2.02240732655527e-315	0.935293084375819	0.591	0.341	9.43857499303343e-311	Crsca17aG0250300	XY
4.92984767533989e-311	1.92696720922743	0.261	0.091	2.30075991008112e-306	Crsca17aG0151100	XY
1.16921461399334e-308	1.42960913416275	0.345	0.143	5.45672460350691e-304	Crsca05aG0191900	XY
5.65983195615396e-306	1.83737763019597	0.253	0.086	2.64144357393705e-301	Crsca04aG0220400	XY
1.49824026652755e-304	1.26806602042367	0.484	0.259	6.99228732388406e-300	Crsca12aG0075600	XY
1.63733132721676e-304	1.10629545645244	0.622	0.405	7.64142530412062e-300	Crsca05aG0028200	XY
4.20745241142765e-303	1.21422107535225	0.431	0.21	1.96361804041328e-298	Crsca05aG0194300	XY
2.58249737349025e-297	1.58613876038394	0.301	0.118	1.2052515242079e-292	Crsca15aG0200600	XY
2.19859001744888e-296	1.46119316670468	0.343	0.147	1.02608196114339e-291	Crsca07aG0235000	XY
1.13837538601364e-292	1.53535320551565	0.319	0.131	5.31279792652564e-288	Crsca14aG0040500	XY
1.34840717311054e-289	1.51782176183513	0.312	0.127	6.2930162769069e-285	Crsca02aG0313900	XY
2.46412710745038e-280	1.34009732924439	0.404	0.201	1.15000812104709e-275	Crsca15aG0136300	XY
7.38638446227501e-280	1.12713429674693	0.546	0.335	3.44722562854375e-275	Crsca15aG0065100	XY
2.4005920544943e-277	1.78451592619014	0.251	0.089	1.12035631183249e-272	Crsca08aG0003400	XY
1.36949473363575e-275	1.59457811141132	0.268	0.101	6.39143192187806e-271	Crsca17aG0065200	XY
6.58888337798978e-275	1.17826205852492	0.503	0.294	3.07503187250783e-270	Crsca17aG0209000	XY
2.27396608125822e-272	1.3973772807609	0.301	0.122	1.06125997012321e-267	Crsca01aG0266600	XY
2.56417286695261e-272	1.68393957638234	0.258	0.096	1.19669947700678e-267	Crsca14aG0214500	XY
1.47373306034572e-271	1.44276434430153	0.327	0.141	6.87791219263349e-267	Crsca12aG0165500	XY
8.49536673497758e-268	1.49003806539329	0.27	0.102	3.96478765521404e-263	Crsca15aG0003100	XY
2.25397559557079e-266	1.4044183860803	0.339	0.151	1.05193041045289e-261	Crsca13aG0222700	XY
2.07578221400835e-265	1.01197607620668	0.365	0.161	9.68767559277695e-261	Crsca16aG0102300	XY
1.14291536543952e-262	1.43882339077612	0.323	0.142	5.33398601050626e-258	Crsca15aG0017000	XY
1.94063834154606e-260	1.14287140513516	0.571	0.349	9.05695913999546e-256	Crsca03aG0108900	XY
1.57465100000274e-259	1.60521015671541	0.309	0.135	7.3488962170128e-255	Crsca04aG0084800	XY
1.75703014264052e-259	0.938424940131324	0.354	0.157	8.20005967570331e-255	Crsca11aG0212300	XY
7.45301167595172e-258	1.31906358454283	0.273	0.104	3.47832054916667e-253	Crsca06aG0081300	XY
1.50699334801831e-257	1.57017789433869	0.277	0.111	7.03313795520146e-253	Crsca14aG0142300	XY
8.98051475758155e-255	1.15495848905003	0.455	0.253	4.19120623736331e-250	Crsca06aG0199900	XY
1.41072205831655e-254	1.34088439908906	0.335	0.153	6.58383984616332e-250	Crsca02aG0160000	XY
1.16572067641299e-253	0.95520578079574	0.425	0.214	5.4404183968194e-249	Crsca06aG0274700	XY
3.75206925867683e-253	1.30127220954821	0.431	0.234	1.75109072302447e-248	Crsca10aG0133600	XY
6.62445787836007e-243	1.24642166710067	0.357	0.172	3.09163449183065e-238	Crsca05aG0102900	XY
3.59256101602104e-241	0.970410578396941	0.494	0.276	1.67664822617702e-236	Crsca13aG0146000	XY
4.03469957210948e-241	0.963575944636886	0.466	0.256	1.88299429030349e-236	Crsca07aG0093000	XY
2.15741467978052e-240	1.40549050263781	0.285	0.12	1.00686543105357e-235	Crsca16aG0224000	XY
8.16365427153569e-240	1.23979358034222	0.358	0.174	3.80997744852571e-235	Crsca02aG0111900	XY
1.31199763477369e-238	0.9159137867417	0.473	0.261	6.12309296148883e-234	Crsca10aG0034000	XY
8.17133043123311e-238	1.40468217314895	0.27	0.109	3.81355991225649e-233	Crsca16aG0098000	XY
1.0227338996089e-237	1.08995492896949	0.294	0.122	4.77309910947474e-233	Crsca07aG0032700	XY
5.91680874493503e-237	1.07551907384448	0.29	0.118	2.76137464126118e-232	Crsca10aG0133800	XY
2.68491452800859e-231	1.41444395289744	0.289	0.126	1.25304961022161e-226	Crsca05aG0060700	XY
4.12467336052856e-231	1.17038250841119	0.37	0.185	1.92498505735868e-226	Crsca04aG0211400	XY
2.00056006595256e-230	1.15374817659815	0.35	0.169	9.3366138278006e-226	Crsca17aG0232800	XY
1.82971167708268e-229	0.917777829907171	0.504	0.297	8.53926439694487e-225	Crsca10aG0198900	XY
8.32662131459991e-229	1.07724111910351	0.368	0.18	3.88603416752378e-224	Crsca11aG0163600	XY
3.58107130275819e-227	0.924405725427393	0.301	0.127	1.67128597699725e-222	Crsca17aG0024800	XY
4.78541990933598e-227	1.43186052486427	0.257	0.104	2.2333554716871e-222	Crsca06aG0252500	XY
9.1820896704705e-226	1.28598990656622	0.252	0.099	4.28528124920858e-221	Crsca02aG0327700	XY
2.71676990047866e-219	1.12845615385636	0.624	0.45	1.26791651255339e-214	Crsca06aG0184600	XY
2.84991058428156e-209	1.02958771766662	0.36	0.182	1.3300532696842e-204	Crsca04aG0105800	XY
3.59427744838617e-206	1.23730044828484	0.287	0.13	1.67744928516182e-201	Crsca01aG0128600	XY
4.38908341356133e-198	1.22211817001531	0.283	0.129	2.04838522910907e-193	Crsca11aG0025100	XY
2.52484747384221e-197	1.32724136684541	0.273	0.124	1.17834631604216e-192	Crsca07aG0200600	XY
4.1146901542644e-196	0.638280373788076	0.76	0.602	1.9203258949952e-191	Crsca16aG0143600	XY
7.45849066348342e-189	1.12991730241885	0.327	0.166	3.48087759264771e-184	Crsca09aG0276400	XY
1.89482235935768e-188	1.06016490621077	0.411	0.239	8.84313595112229e-184	Crsca06aG0175600	XY
3.42994614285362e-188	1.16902841885214	0.314	0.157	1.60075586486978e-183	Crsca01aG0056500	XY
4.14341841255969e-188	1.15388168891842	0.346	0.185	1.93373337314161e-183	Crsca05aG0079600	XY
2.01602638467072e-187	1.39272003134227	0.254	0.114	9.40879513725824e-183	Crsca17aG0246800	XY
5.02976550695961e-187	1.1541200311065	0.466	0.297	2.34739156209805e-182	Crsca17aG0117600	XY
1.50424057960562e-181	1.00429949789581	0.377	0.208	7.02029078501943e-177	Crsca09aG0064400	XY
1.24934157241522e-180	1.17858589598124	0.286	0.139	5.83067711846182e-176	Crsca02aG0232800	XY
1.79343652679172e-180	0.990871696667858	0.334	0.171	8.36996827053695e-176	Crsca09aG0246500	XY
1.70845655788676e-175	1.0707357062723	0.3	0.148	7.9733667556575e-171	Crsca16aG0054900	XY
5.82372523170806e-173	0.852908608005188	0.435	0.261	2.71793256563815e-168	Crsca03aG0300300	XY
1.99126616825119e-172	0.790058425078091	0.584	0.412	9.29323920722829e-168	Crsca17aG0231400	XY
1.0010292191056e-171	1.23914510228439	0.309	0.16	4.67180336556584e-167	Crsca06aG0245400	XY
1.22497409804673e-171	1.16951787965326	0.277	0.134	5.71695411558408e-167	Crsca13aG0160800	XY
6.99364419886667e-171	1.29556088479114	0.25	0.116	3.26393374761108e-166	Crsca07aG0205400	XY
4.39242113707803e-170	1.14071970946285	0.264	0.125	2.04994294467431e-165	Crsca04aG0029900	XY
3.42003058379772e-166	1.09292720394165	0.28	0.137	1.5961282734584e-161	Crsca03aG0158400	XY
5.22906370786181e-166	1.05824397148993	0.265	0.124	2.44040403245911e-161	Crsca03aG0278200	XY
3.08303631852653e-163	0.852125377667085	0.459	0.29	1.43885304985633e-158	Crsca08aG0015300	XY
6.3868648943038e-162	0.810674460989298	0.579	0.408	2.98074984617158e-157	Crsca16aG0075100	XY
2.73289832262925e-161	1.18167491875226	0.306	0.157	1.27544364717107e-156	Crsca04aG0284500	XY
6.74870865687713e-161	1.02773368492793	0.397	0.236	3.14962233016456e-156	Crsca06aG0197000	XY
2.60891751180194e-159	0.877204343199042	0.396	0.231	1.21758180275797e-154	Crsca04aG0069000	XY
6.39460492786229e-159	0.857666392720584	0.424	0.257	2.98436211983333e-154	Crsca03aG0160900	XY
3.25415228526241e-157	0.997733311265458	0.294	0.15	1.51871287153197e-152	Crsca14aG0190000	XY
5.41588816076557e-156	1.12676461386469	0.282	0.143	2.52759500462929e-151	Crsca12aG0134500	XY
2.688665431178e-155	0.911711257239965	0.353	0.198	1.25480015673077e-150	Crsca12aG0211000	XY
4.51811117479484e-155	0.847038986983561	0.472	0.303	2.10860248527675e-150	Crsca05aG0195100	XY
9.83742585611248e-154	0.939398650953347	0.372	0.216	4.59112664704769e-149	Crsca15aG0157300	XY
1.50363070157594e-150	0.474100198412732	0.556	0.366	7.0174444842549e-146	Crsca12aG0288800	XY
2.11929618612031e-150	0.993570094558654	0.279	0.142	9.89075530062347e-146	Crsca07aG0167900	XY
7.80407745203603e-143	0.910549392238349	0.308	0.166	3.64216294686522e-138	Crsca13aG0155500	XY
1.35246581052061e-141	0.966476361290707	0.328	0.186	6.31195793769967e-137	Crsca14aG0226000	XY
4.33755924801047e-139	0.981111812867549	0.357	0.213	2.02433890104649e-134	Crsca14aG0085100	XY
5.41465254537729e-139	0.717550537003354	0.558	0.399	2.52701834292758e-134	Crsca16aG0154100	XY
6.55313027014006e-137	1.06986619011922	0.252	0.128	3.05834589707436e-132	Crsca10aG0082300	XY
1.01580498558267e-136	0.774865170936531	0.265	0.133	4.74076186771432e-132	Crsca12aG0130400	XY
1.47893477546536e-136	0.772579154674977	0.442	0.286	6.90218859709684e-132	Crsca08aG0025900	XY
2.97601384432163e-135	1.03249946335517	0.289	0.157	1.3889056611449e-130	Crsca09aG0050200	XY
4.25894794948572e-135	0.793017144633985	0.433	0.279	1.98765100802498e-130	Crsca17aG0174000	XY
7.90028554737995e-133	0.394529950592324	0.444	0.264	3.68706326496222e-128	Crsca05aG0162700	XY
3.88051530898879e-131	0.646588346084027	0.411	0.254	1.81103649470507e-126	Crsca13aG0240600	XY
4.64391032565959e-130	0.542070135659936	0.579	0.416	2.16731294898533e-125	Crsca07aG0182000	XY
6.78176321751167e-129	0.974849824846415	0.269	0.143	3.1650488936127e-124	Crsca12aG0189200	XY
2.60382595375602e-128	0.907669173697838	0.304	0.17	1.21520557261794e-123	Crsca04aG0152000	XY
1.44500938590192e-127	0.715980358125671	0.316	0.175	6.74385880400424e-123	Crsca15aG0237500	XY
1.55793996008252e-126	0.66671638437271	0.511	0.353	7.27090579370511e-122	Crsca09aG0133400	XY
6.33545895483596e-126	0.80775029074895	0.372	0.229	2.95675869422194e-121	Crsca08aG0229800	XY
1.13127003698932e-125	0.968047738517701	0.273	0.147	5.27963726262916e-121	Crsca11aG0041200	XY
2.72712041731262e-125	0.99484876563401	0.262	0.138	1.2727470987598e-120	Crsca15aG0017500	XY
3.92582151784532e-124	0.79055863598377	0.261	0.134	1.83218090237841e-119	Crsca01aG0103400	XY
4.71926738486094e-124	1.14420749006639	0.406	0.268	2.2024820885146e-119	Crsca02aG0128300	XY
5.97590093691837e-122	0.53143025233268	0.4	0.249	2.7889529672598e-117	Crsca13aG0228800	XY
7.17001808969152e-122	1.02945184167233	0.289	0.164	3.34624744245903e-117	Crsca15aG0110100	XY
1.44098616570789e-118	0.900396657225516	0.473	0.337	6.7250824353587e-114	Crsca07aG0146000	XY
2.09908615920175e-118	0.832944139468023	0.327	0.194	9.79643510499458e-114	Crsca16aG0221500	XY
1.14568730506226e-117	0.569661791437383	0.58	0.429	5.34692265272556e-113	Crsca07aG0124300	XY
3.04148546913498e-117	1.04780954655098	0.257	0.139	1.4194612684453e-112	Crsca02aG0158000	XY
4.35628458399454e-117	0.8277908394005	0.269	0.146	2.03307801535025e-112	Crsca06aG0117500	XY
1.17356364751905e-116	0.677706730577732	0.403	0.258	5.47702154297142e-112	Crsca17aG0121900	XY
2.3156633885383e-116	0.886011242912921	0.269	0.147	1.08072010343082e-111	Crsca07aG0063300	XY
2.62635539868847e-115	0.470102100880039	0.407	0.254	1.22572006456791e-110	Crsca01aG0155400	XY
4.84325505339748e-115	0.64417873583799	0.355	0.212	2.26034713342061e-110	Crsca01aG0027500	XY
3.81573217198675e-114	1.07716912094663	0.264	0.147	1.78080220466621e-109	Crsca05aG0169200	XY
1.10793561256011e-113	0.942215958305644	0.276	0.155	5.17073550381802e-109	Crsca13aG0192300	XY
1.77403232012926e-113	0.868731154321584	0.293	0.17	8.27940883804324e-109	Crsca04aG0195100	XY
2.18942308269315e-112	0.948251380517829	0.258	0.142	1.02180375269289e-107	Crsca09aG0143300	XY
5.47587493373092e-112	0.815516324887623	0.339	0.209	2.55559083157222e-107	Crsca02aG0005200	XY
8.40586254575993e-112	0.846342777573038	0.276	0.155	3.92301605010616e-107	Crsca01aG0135200	XY
1.26917026175809e-111	0.466452641177335	0.436	0.279	5.92321761162499e-107	Crsca11aG0207500	XY
1.2181778043714e-110	0.607965127489808	0.414	0.265	5.68523581300134e-106	Crsca09aG0209200	XY
1.42452625796844e-110	0.948689629453349	0.264	0.147	6.64826404593872e-106	Crsca03aG0175300	XY
1.94682740266832e-110	0.650254625286916	0.359	0.221	9.08584348825306e-106	Crsca15aG0084900	XY
1.49235243734281e-109	0.773866140306023	0.357	0.225	6.96480882507889e-105	Crsca02aG0250600	XY
2.72890256454411e-109	0.954544000845436	0.308	0.186	1.27357882687274e-104	Crsca16aG0160000	XY
4.61172047785489e-108	0.821404530568585	0.422	0.29	2.15228994701488e-103	Crsca12aG0115800	XY
1.45906797401887e-106	0.59088413498717	0.526	0.384	6.80947023474606e-102	Crsca02aG0043100	XY
1.46217955804504e-105	0.813650332997581	0.323	0.2	6.82399199739618e-101	Crsca01aG0225100	XY
4.24306415114144e-105	0.821141368340284	0.33	0.205	1.98023803933771e-100	Crsca03aG0132500	XY
7.98825176196273e-105	0.862964175168027	0.25	0.137	3.72811709730801e-100	Crsca17aG0178200	XY
5.31535340436887e-104	0.876344810516359	0.272	0.157	2.48067543381895e-99	Crsca07aG0130900	XY
1.1257031449553e-102	1.00253797237693	0.255	0.146	5.25365657750637e-98	Crsca07aG0224700	XY
7.72165831268334e-102	0.588128350838367	0.536	0.396	3.60369793452931e-97	Crsca11aG0216700	XY
1.47276843121536e-98	0.562923508492397	0.574	0.44	6.87341026848209e-94	Crsca01aG0034800	XY
1.74786997054446e-98	0.563472006725023	0.325	0.198	8.15730915253099e-94	Crsca12aG0054500	XY
7.68329881701358e-98	0.608541968103427	0.441	0.304	3.58579555790024e-93	Crsca11aG0083600	XY
4.2526911703147e-96	0.547973254608236	0.398	0.261	1.98473096918587e-91	Crsca02aG0277500	XY
1.49644920331412e-94	0.735363569046649	0.328	0.207	6.98392843186698e-90	Crsca11aG0062300	XY
4.32573218355095e-94	0.735959852742331	0.34	0.219	2.01881921006323e-89	Crsca12aG0009500	XY
2.38204076240531e-93	0.72744480895387	0.332	0.21	1.11169842381456e-88	Crsca07aG0189000	XY
4.76736981555918e-92	0.61603808676441	0.597	0.479	2.22493149292147e-87	Crsca04aG0333700	XY
8.30499129335616e-92	0.500180522612751	0.539	0.404	3.87593943660932e-87	Crsca16aG0175100	XY
3.0493663146847e-91	0.784189725044443	0.318	0.2	1.42313925906335e-86	Crsca14aG0219100	XY
8.50201042000927e-91	0.417723125742023	0.755	0.637	3.96788826301833e-86	Crsca09aG0206400	XY
1.06076266556659e-90	0.64187985369928	0.353	0.229	4.95057936019926e-86	Crsca11aG0048000	XY
1.67634121192113e-90	0.767441238737365	0.345	0.225	7.82348443603591e-86	Crsca14aG0073300	XY
6.9893574086057e-90	0.684830187321558	0.304	0.188	3.26193310259628e-85	Crsca01aG0036900	XY
7.15185662302698e-89	0.656161783671485	0.344	0.223	3.33777148596669e-84	Crsca04aG0062100	XY
8.22367297091561e-89	0.636070104292057	0.292	0.176	3.83798817552632e-84	Crsca05aG0158500	XY
2.53801609356286e-87	0.690024241576684	0.314	0.198	1.18449211086579e-82	Crsca10aG0231200	XY
5.27414677956914e-87	0.573048697722093	0.362	0.236	2.46144430202492e-82	Crsca08aG0008900	XY
1.08228784354968e-86	0.577040007431996	0.329	0.209	5.05103736584635e-82	Crsca12aG0087300	XY
1.36419536184407e-86	0.568896076602375	0.524	0.396	6.36669975372628e-82	Crsca03aG0148500	XY
3.89490548609381e-86	0.28645122305062	0.629	0.495	1.81775239035998e-81	Crsca04aG0140400	XY
1.15376430335137e-85	0.418628006951702	0.621	0.488	5.38461800374082e-81	Crsca06aG0124400	XY
2.65963148386249e-85	0.601171160544138	0.409	0.284	1.24125001351862e-80	Crsca06aG0135500	XY
1.05161941046719e-84	0.467573141563908	0.407	0.278	4.90790778865039e-80	Crsca02aG0209300	XY
1.65924168095419e-84	0.397906466449525	0.58	0.451	7.74368092501319e-80	Crsca05aG0189500	XY
1.91939525159058e-84	0.468231184304398	0.6	0.466	8.95781763917325e-80	Crsca12aG0075800	XY
1.91292815840846e-83	0.462486865277037	0.492	0.357	8.92763571529229e-79	Crsca12aG0257800	XY
2.45196697018913e-83	0.593252018501799	0.476	0.35	1.14433298498727e-78	Crsca12aG0028900	XY
1.20616460502881e-82	0.560104154784922	0.394	0.271	5.62917021166944e-78	Crsca10aG0240800	XY
1.11382183679495e-81	0.70568610977822	0.341	0.229	5.19820651232201e-77	Crsca06aG0138100	XY
5.14486544663845e-81	0.632714673368776	0.375	0.258	2.40110870394616e-76	Crsca14aG0199100	XY
5.30288169827832e-80	0.278837329988655	0.71	0.594	2.47485488858649e-75	Crsca01aG0291400	XY
7.76185565145386e-80	0.791637083326657	0.381	0.266	3.62245803253352e-75	Crsca14aG0226600	XY
1.49943624214401e-79	0.683904217166218	0.303	0.195	6.9978689420861e-75	Crsca10aG0239400	XY
2.73880410886335e-79	0.749343835131678	0.261	0.16	1.27819987760653e-74	Crsca03aG0126900	XY
2.74657958302346e-79	0.318968686438787	0.672	0.54	1.28182869139705e-74	Crsca06aG0229000	XY
3.01364263929641e-79	0.642082918478023	0.302	0.192	1.40646701975963e-74	Crsca06aG0121900	XY
4.24464957757985e-79	1.22514	0.314	0.216	1.98097795785652e-74	Crsca09aG0066300	XY
6.03127659033442e-79	0.667277960512986	0.265	0.162	2.81479678470907e-74	Crsca14aG0098500	XY
2.35192512255626e-78	0.603561775647654	0.362	0.246	1.09764345469701e-73	Crsca12aG0151800	XY
8.37213572742462e-78	0.477607728122392	0.434	0.308	3.90727574398907e-73	Crsca03aG0076000	XY
1.02572447478732e-77	0.769948392470231	0.277	0.176	4.78705612383244e-73	Crsca10aG0065000	XY
1.49041423478823e-77	0.607969584164348	0.344	0.228	6.95576323375666e-73	Crsca14aG0213400	XY
8.12912577551022e-77	0.445560896895713	0.412	0.284	3.79386299943062e-72	Crsca06aG0059100	XY
1.14135335899527e-76	0.727672532891882	0.408	0.29	5.32669612643094e-72	Crsca06aG0141200	XY
6.94957748466116e-76	0.684198175855279	0.281	0.177	3.24336781209137e-71	Crsca01aG0005300	XY
8.1710538267412e-76	0.64477163592536	0.266	0.164	3.81343082094012e-71	Crsca13aG0250000	XY
1.85239617990424e-75	0.635029704548745	0.265	0.163	8.64513297161311e-71	Crsca08aG0054500	XY
9.73687381947823e-75	0.962174279631645	0.269	0.174	4.54419901155049e-70	Crsca11aG0261200	XY
1.67447716720189e-74	0.774549759812564	0.262	0.165	7.81478493933124e-70	Crsca02aG0030500	XY
1.29737548980645e-72	0.49869212445317	0.505	0.385	6.05485141092669e-68	Crsca01aG0226400	XY
6.8669607760118e-72	0.695528059232101	0.306	0.203	3.20481059416471e-67	Crsca04aG0057800	XY
2.34942494707523e-70	0.849582062391585	0.259	0.165	1.09647662280001e-65	Crsca07aG0101600	XY
9.025211920274e-69	0.788587696838066	0.257	0.164	4.21206640319188e-64	Crsca08aG0262700	XY
3.15305883149904e-68	0.582553105168756	0.343	0.236	1.4715325566606e-63	Crsca16aG0174500	XY
5.81236761351078e-68	0.651504490274318	0.268	0.171	2.71263196522548e-63	Crsca12aG0160400	XY
2.28873979329477e-66	0.624993384494345	0.331	0.229	1.06815486153067e-61	Crsca08aG0038700	XY
7.67311934615774e-64	0.480226685646111	0.263	0.167	3.58104479885182e-59	Crsca09aG0258200	XY
5.90144865407081e-63	0.552091379508073	0.254	0.162	2.75420608685484e-58	Crsca07aG0106700	XY
9.47566675511794e-63	0.515914272148046	0.346	0.24	4.42229367461354e-58	Crsca03aG0151500	XY
1.00259118124611e-62	0.439332261863652	0.405	0.291	4.67909304287557e-58	Crsca02aG0190400	XY
5.85604273938978e-62	0.489958550227983	0.429	0.322	2.73301514647321e-57	Crsca03aG0171000	XY
5.7755609570042e-61	0.423483081212244	0.325	0.221	2.69545429863386e-56	Crsca06aG0191900	XY
4.48360938667388e-60	0.578242616470173	0.269	0.177	2.0925005007607e-55	Crsca08aG0103100	XY
9.17606745511664e-59	0.506238753818188	0.256	0.165	4.28247068130294e-54	Crsca14aG0193900	XY
1.18788761699734e-58	0.278885292249847	0.432	0.31	5.5438715085266e-54	Crsca17aG0201000	XY
1.30287876767405e-58	0.525893684564223	0.39	0.288	6.0805352087348e-54	Crsca04aG0202200	XY
6.24620106859107e-57	0.579771340033349	0.254	0.166	2.91510203871145e-52	Crsca05aG0032600	XY
1.67107469278415e-56	0.403069207396366	0.291	0.192	7.79890559122364e-52	Crsca03aG0327800	XY
2.69309589549862e-56	0.475652593795414	0.363	0.263	1.2568678544292e-51	Crsca09aG0062300	XY
4.34185071101664e-56	0.598086593863278	0.268	0.18	2.02634172683147e-51	Crsca07aG0041100	XY
9.90991060325045e-56	0.605699176617845	0.278	0.189	4.62495527853699e-51	Crsca06aG0248200	XY
4.01877049724393e-55	0.29221407923766	0.546	0.437	1.87556019106374e-50	Crsca10aG0015600	XY
5.28282466022242e-55	0.561022135699296	0.277	0.188	2.4654942689258e-50	Crsca11aG0044400	XY
5.5093607808106e-55	0.362991385374912	0.559	0.446	2.57121867640431e-50	Crsca01aG0235200	XY
5.77515040385361e-55	0.512461010066148	0.34	0.243	2.69526269347848e-50	Crsca07aG0202000	XY
6.65415599233427e-55	0.552450236344729	0.304	0.212	3.1054946016224e-50	Crsca14aG0112400	XY
1.00926784649819e-54	0.5488535011862	0.297	0.207	4.71025303960704e-50	Crsca10aG0197800	XY
2.65382619207513e-54	0.573394601208506	0.363	0.267	1.23854068384146e-49	Crsca06aG0147300	XY
1.92864996749832e-53	0.49757123406121	0.399	0.303	9.00100939831466e-49	Crsca17aG0084000	XY
6.39292355381155e-53	0.553570621554909	0.272	0.186	2.98357742256385e-48	Crsca14aG0119500	XY
1.10342174145811e-52	0.504040224419526	0.299	0.207	5.14966926738499e-48	Crsca14aG0106200	XY
8.74928577313254e-51	0.437338019507121	0.317	0.224	4.08329167032096e-46	Crsca11aG0027800	XY
1.28332036399202e-50	0.568783474723715	0.308	0.219	5.98925613875076e-46	Crsca13aG0112100	XY
1.35208876995656e-50	0.599893647400139	0.265	0.182	6.31019828938729e-46	Crsca02aG0288700	XY
2.61759387941788e-50	0.474333151550445	0.316	0.224	1.22163106352432e-45	Crsca01aG0090600	XY
3.84827601681089e-50	0.429544270147743	0.297	0.209	1.79599041704564e-45	Crsca13aG0060000	XY
9.2525373894665e-49	0.448648999330805	0.293	0.204	4.31815919966401e-44	Crsca05aG0181400	XY
1.05810703895037e-47	0.52355884698545	0.3	0.213	4.93818555078137e-43	Crsca15aG0182600	XY
1.43480125542056e-47	0.4392160163657	0.369	0.277	6.69621745904774e-43	Crsca01aG0225300	XY
8.78781913576028e-46	0.535138940220331	0.321	0.236	4.10127519065932e-41	Crsca01aG0275100	XY
3.51541749578889e-45	0.570855871602192	0.338	0.255	1.64064534528468e-40	Crsca04aG0058100	XY
7.16675094087417e-45	0.512832633483787	0.258	0.178	3.34472266410597e-40	Crsca15aG0130600	XY
3.79618110009736e-44	0.502192004130847	0.286	0.205	1.77167771941544e-39	Crsca10aG0149900	XY
2.73475544138918e-43	0.517190391157094	0.346	0.263	1.27631036449633e-38	Crsca11aG0133300	XY
5.09454116449986e-42	0.597261344868825	0.304	0.226	2.37762236147209e-37	Crsca01aG0029600	XY
7.44309198313556e-42	0.476749608119998	0.251	0.175	3.47369102852936e-37	Crsca02aG0042700	XY
3.04126646889253e-41	0.459931745966961	0.327	0.244	1.41935906103215e-36	Crsca02aG0065800	XY
2.19285429749376e-40	0.388578281759738	0.339	0.252	1.02340510064034e-35	Crsca02aG0001400	XY
3.69177004934597e-40	0.470458107062659	0.287	0.207	1.72294908202977e-35	Crsca02aG0210200	XY
5.07899904062879e-40	0.49250798613687	0.274	0.199	2.37036885226145e-35	Crsca15aG0206400	XY
1.00271525018024e-39	0.432836889835908	0.35	0.268	4.67967207259119e-35	Crsca17aG0197900	XY
2.89309306449374e-39	0.528917207044945	0.302	0.227	1.35020653319923e-34	Crsca10aG0065700	XY
1.09527514305433e-38	0.48822191782009	0.303	0.226	5.11164909263456e-34	Crsca04aG0226000	XY
1.80698982669934e-38	0.415511752005025	0.346	0.263	8.43322152120582e-34	Crsca12aG0192700	XY
8.69080950474773e-38	0.420269068505285	0.261	0.186	4.05600079586577e-33	Crsca11aG0193500	XY
1.07830407428431e-37	0.515253679774197	0.255	0.184	5.03244511468487e-33	Crsca04aG0181000	XY
3.32262415974601e-36	0.256586593797404	0.451	0.362	1.55066869535346e-31	Crsca06aG0198300	XY
7.5306365616189e-36	0.523563206482663	0.327	0.254	3.51454808330754e-31	Crsca12aG0151400	XY
2.25512299173177e-35	0.356524591042097	0.27	0.195	1.05246590024122e-30	Crsca09aG0232500	XY
9.14027775433859e-35	0.393546383216463	0.378	0.3	4.26576762794982e-30	Crsca06aG0164400	XY
3.09788240709327e-33	0.314804922872348	0.456	0.374	1.44578171939043e-28	Crsca13aG0186600	XY
3.88025420174506e-33	0.375893258055725	0.273	0.201	1.81091463595442e-28	Crsca09aG0274800	XY
3.26470371160066e-32	0.345260547902848	0.33	0.254	1.52363722220403e-27	Crsca12aG0239400	XY
4.57963099932064e-32	0.392413071229509	0.27	0.2	2.13731378738294e-27	Crsca16aG0090200	XY
1.13046974183622e-31	0.413968629992576	0.34	0.268	5.27590228514965e-27	Crsca12aG0137200	XY
1.97673586882934e-31	0.366761979685421	0.266	0.197	9.22542629982651e-27	Crsca01aG0048300	XY
3.56760660510143e-31	0.29434956680236	0.353	0.274	1.66500200260084e-26	Crsca17aG0134900	XY
4.69386335374218e-31	0.324349166892905	0.319	0.243	2.19062602719147e-26	Crsca04aG0237500	XY
6.74389591560192e-31	0.396463511947842	0.326	0.254	3.14737622381142e-26	Crsca04aG0049000	XY
1.30031988312646e-30	0.44634824174502	0.252	0.188	6.06859289455119e-26	Crsca16aG0059800	XY
4.47982902675959e-28	0.30354697711564	0.425	0.349	2.0907362067887e-23	Crsca02aG0230400	XY
2.5279669622808e-27	0.314286624006993	0.404	0.33	1.17980218129645e-22	Crsca11aG0045800	XY
6.82361585787723e-25	0.356558826866043	0.303	0.238	3.1845815208713e-20	Crsca05aG0133600	XY
8.4521716518049e-25	0.302758577664921	0.323	0.256	3.94462850989735e-20	Crsca08aG0208100	XY
8.81058176361928e-24	0.323226848633012	0.336	0.27	4.11189850908112e-19	Crsca08aG0057800	XY
1.41318905517727e-23	0.367091629460248	0.281	0.222	6.59535332051231e-19	Crsca12aG0287600	XY
8.53904446170413e-23	0.339714024393442	0.287	0.229	3.98517205027732e-18	Crsca17aG0129200	XY
1.65160761413891e-22	0.332802280329054	0.303	0.243	7.70805273518631e-18	Crsca06aG0109600	XY
1.22563444219923e-21	0.2958528980928	0.357	0.295	5.72003594174382e-17	Crsca12aG0130500	XY
2.58410712015915e-20	0.288442439100344	0.328	0.268	1.20600279297828e-15	Crsca15aG0136400	XY
2.95042963575862e-20	0.34330431243901	0.274	0.22	1.37696551100855e-15	Crsca17aG0018000	XY
4.7610249276088e-19	0.350349870026949	0.31	0.257	2.22197033371503e-14	Crsca04aG0191800	XY
5.41991131511611e-19	0.267787023689897	0.254	0.2	2.52947261076469e-14	Crsca02aG0013100	XY
2.15802094969426e-18	0.290909455957538	0.309	0.254	1.00714837722231e-13	Crsca01aG0290900	XY
7.70495938022258e-18	0.295285507048969	0.25	0.199	3.59590454274988e-13	Crsca08aG0170600	XY
1.46480013599337e-17	0.276972100880993	0.262	0.211	6.83622223468107e-13	Crsca09aG0238900	XY
2.63432992088313e-16	0.26749267553352	0.268	0.218	1.22944177407616e-11	Crsca14aG0009300	XY
8.13307319550961e-15	0.277280649120688	0.278	0.231	3.79570526034434e-10	Crsca17aG0248800	XY
5.77277816231755e-14	0.334745874153018	0.301	0.257	2.6941555683536e-09	Crsca04aG0009500	XY
1.40983602633438e-11	0.257685573989645	0.39	0.353	6.57970473490255e-07	Crsca06aG0215400	XY
6.61729021337834e-11	0.776010387611378	0.374	0.353	3.08828934258367e-06	Crsca14aG0225500	XY
0	2.96976854603435	0.305	0.055	0	Crsca03aG0044200	PP
0	2.85637781681302	0.279	0.053	0	Crsca01aG0210100	PP
0	2.89724805696056	0.265	0.045	0	Crsca11aG0044000	PP
0	2.60648059167347	0.259	0.058	0	Crsca04aG0009800	PP
3.68561878441361e-274	2.20284966109928	0.273	0.078	1.72007828668583e-269	Crsca12aG0198600	PP
2.44528248215938e-247	2.12569468208987	0.332	0.12	1.14121333442378e-242	Crsca13aG0093000	PP
2.6581289801544e-232	1.72283006924211	0.351	0.134	1.24054879503806e-227	Crsca17aG0236700	PP
7.41384601028885e-217	1.67148737306704	0.363	0.148	3.4600419330018e-212	Crsca09aG0200600	PP
5.09543100769405e-215	1.99613514819344	0.253	0.08	2.37803765129081e-210	Crsca07aG0031800	PP
2.41082256502425e-181	1.49076095752596	0.354	0.154	1.12513089109682e-176	Crsca01aG0145400	PP
2.3022130686596e-164	1.52040665912945	0.371	0.178	1.07444283914343e-159	Crsca04aG0009700	PP
1.7480563593942e-156	0.984868728333645	0.537	0.314	8.15817902929271e-152	Crsca12aG0278600	PP
3.56210400159133e-145	1.36883065295604	0.341	0.162	1.66243393754267e-140	Crsca02aG0317300	PP
1.82287603933208e-138	1.14840187727027	0.524	0.314	8.5073624755628e-134	Crsca09aG0003400	PP
1.18410015366109e-136	1.38845112682222	0.375	0.187	5.52619541713632e-132	Crsca12aG0080300	PP
8.58044259086427e-133	1.21787156143749	0.343	0.167	4.00449255715636e-128	Crsca03aG0037700	PP
4.03755938489e-130	1.18940739707062	0.259	0.107	1.88432896492816e-125	Crsca14aG0091600	PP
1.86468547534137e-119	1.22451622783105	0.304	0.144	8.70248711341819e-115	Crsca07aG0159900	PP
1.05044518807079e-118	1.38414709159073	0.31	0.15	4.90242769272637e-114	Crsca02aG0050400	PP
2.12914075517682e-116	0.716841186910745	0.705	0.52	9.93669990441024e-112	Crsca13aG0034300	PP
2.27358418812235e-111	1.22287501927696	0.261	0.117	1.0610817405967e-106	Crsca07aG0100600	PP
3.15043125795689e-111	1.01380315366162	0.408	0.232	1.47030626808848e-106	Crsca02aG0187500	PP
3.0315635513549e-106	1.30431724192633	0.321	0.165	1.41483070941733e-101	Crsca07aG0106700	PP
4.98570094815243e-105	1.02079201417428	0.493	0.322	2.32682663250274e-100	Crsca02aG0317000	PP
5.69248935115657e-101	0.764040158013377	0.533	0.342	2.65668478018477e-96	Crsca06aG0215400	PP
1.06852432179093e-98	0.965266366956312	0.407	0.236	4.98680300979828e-94	Crsca04aG0240000	PP
4.41848617514806e-97	1.12673679383429	0.348	0.191	2.0621074979416e-92	Crsca13aG0071800	PP
4.78238349876999e-94	1.16844188883789	0.331	0.18	2.23193837887596e-89	Crsca07aG0202200	PP
1.8310401518524e-89	1.11342313940657	0.288	0.149	8.54546438869515e-85	Crsca15aG0017500	PP
2.63996077690517e-89	1.09845471786064	0.257	0.126	1.23206969458164e-84	Crsca08aG0176200	PP
5.03866904881257e-87	0.768608367816465	0.461	0.286	2.35154684508083e-82	Crsca03aG0333800	PP
6.80413891632646e-77	1.00621283642697	0.303	0.17	3.17549163224956e-72	Crsca07aG0101600	PP
7.42662026476329e-77	0.80564882618283	0.328	0.185	3.46600367756503e-72	Crsca12aG0043900	PP
1.97477265316881e-76	0.767345315125077	0.436	0.28	9.21626397233886e-72	Crsca10aG0240800	PP
8.8900292100544e-74	0.670588143653144	0.398	0.242	4.14897663233239e-69	Crsca13aG0005800	PP
3.89547142735172e-70	0.843529480404049	0.294	0.165	1.81801651514505e-65	Crsca12aG0143700	PP
6.98107961622446e-69	0.732663538127166	0.322	0.187	3.25806985689195e-64	Crsca16aG0055400	PP
8.42100436224734e-69	0.416445232723675	0.6	0.413	3.93008273586083e-64	Crsca17aG0175900	PP
6.5920790833931e-66	0.723460426865999	0.287	0.16	3.07652330821956e-61	Crsca07aG0141100	PP
1.04847998256425e-65	0.669828085774183	0.511	0.36	4.89325607862734e-61	Crsca12aG0028900	PP
2.56469887144765e-64	0.648702311487231	0.39	0.246	1.19694496330462e-59	Crsca02aG0065800	PP
2.32693459695054e-62	0.933664470790861	0.262	0.148	1.08598037639682e-57	Crsca12aG0049500	PP
4.43766845034424e-61	0.571331469365004	0.549	0.401	2.07105986577566e-56	Crsca15aG0006700	PP
8.09705930104834e-60	0.604564118697105	0.31	0.181	3.77889757579926e-55	Crsca01aG0108100	PP
1.03057432726723e-59	0.909908501257077	0.3	0.177	4.80969038535616e-55	Crsca06aG0245400	PP
3.33622729971708e-59	0.843332687787841	0.285	0.168	1.55701728077796e-54	Crsca13aG0192300	PP
7.49169405665432e-59	0.668174289692356	0.576	0.428	3.49637361624057e-54	Crsca06aG0095700	PP
9.55786694257752e-59	0.710770562719508	0.374	0.238	4.46065650210093e-54	Crsca02aG0016700	PP
2.79114000459449e-58	0.571756842362388	0.401	0.258	1.30262504014425e-53	Crsca10aG0166100	PP
1.11111073070688e-56	0.628383397043719	0.362	0.23	5.18555378020903e-52	Crsca12aG0009500	PP
3.70479783391651e-56	0.797868272949213	0.304	0.185	1.72902914908884e-51	Crsca16aG0116900	PP
6.69281453106588e-55	0.771057812996166	0.34	0.215	3.12353654164845e-50	Crsca09aG0185700	PP
6.72573376650756e-55	0.823393721502505	0.381	0.256	3.13889994882908e-50	Crsca12aG0151800	PP
9.40571428161566e-55	0.594349358625644	0.388	0.254	4.38964685523003e-50	Crsca03aG0166100	PP
1.0531285277365e-53	0.862219583021581	0.292	0.178	4.91495083894624e-49	Crsca13aG0160300	PP
5.92900893628658e-53	0.606018709191047	0.322	0.199	2.76706847056495e-48	Crsca06aG0093300	PP
1.51102065388055e-52	0.37490716567314	0.637	0.477	7.05193339166053e-48	Crsca12aG0075800	PP
4.39383268233017e-52	0.767046492491006	0.285	0.174	2.05060171284349e-47	Crsca17aG0006800	PP
1.54060392672543e-51	0.654448752356548	0.26	0.152	7.1899985260276e-47	Crsca14aG0079600	PP
5.82628317568639e-50	0.744741581678475	0.278	0.169	2.71912635809284e-45	Crsca04aG0013700	PP
8.40115802896098e-49	0.641102982008171	0.296	0.184	3.92082045211609e-44	Crsca16aG0159700	PP
1.89044870349543e-48	0.815835181289824	0.487	0.355	8.82272409921315e-44	Crsca01aG0085900	PP
3.72008333529427e-48	0.544533363218546	0.384	0.257	1.73616289258184e-43	Crsca09aG0113200	PP
6.70529541099896e-47	0.647214922853181	0.285	0.175	3.12936136831321e-42	Crsca09aG0258200	PP
1.07188549663509e-46	0.683483022381205	0.264	0.16	5.00248961279595e-42	Crsca14aG0116200	PP
8.69848715825768e-46	0.494933027664886	0.386	0.259	4.05958395675886e-41	Crsca16aG0183400	PP
1.55881024228161e-45	0.506108837178849	0.393	0.267	7.27496740072828e-41	Crsca11aG0133300	PP
1.76798509254375e-45	0.66772242208109	0.413	0.291	8.25118642690168e-41	Crsca12aG0075600	PP
4.52679285074845e-45	0.533160454313421	0.284	0.175	2.1126542234443e-40	Crsca02aG0036400	PP
8.31218820787014e-45	0.498490126707139	0.333	0.215	3.87929823661299e-40	Crsca07aG0097500	PP
1.21607856133625e-44	0.3700394474971	0.56	0.416	5.67543864575627e-40	Crsca16aG0154100	PP
1.66791579709221e-43	0.562979391948968	0.38	0.261	7.78416302502935e-39	Crsca01aG0127900	PP
1.90628060242625e-42	0.494945321595139	0.383	0.262	8.89661157152332e-38	Crsca02aG0191500	PP
5.21445811508999e-42	0.440810512483318	0.457	0.329	2.4335876023125e-37	Crsca02aG0188200	PP
1.98201152184193e-41	0.473464155898576	0.523	0.401	9.25004777243629e-37	Crsca05aG0124800	PP
4.62570023878296e-41	0.58205620915422	0.328	0.218	2.15881430144001e-36	Crsca03aG0042900	PP
2.69974101081122e-40	0.423023709129677	0.345	0.229	1.2599691297456e-35	Crsca07aG0248300	PP
3.80684546588609e-40	0.3886942750502	0.452	0.321	1.77665477892904e-35	Crsca14aG0023200	PP
3.89844718419473e-40	0.388262939254979	0.463	0.33	1.81940530086368e-35	Crsca03aG0171000	PP
2.58161824946342e-38	0.296260791952034	0.335	0.225	1.20484123702458e-33	Crsca09aG0066300	PP
2.60098179684512e-38	0.402656875403312	0.423	0.298	1.21387820458762e-33	Crsca09aG0169100	PP
3.77764805650721e-38	0.529077136943564	0.409	0.298	1.76302834797192e-33	Crsca06aG0059100	PP
6.27152237237162e-38	0.613354992114842	0.359	0.246	2.92691949118584e-33	Crsca08aG0118300	PP
6.43843447210109e-38	0.453395706249544	0.267	0.168	3.00481736812958e-33	Crsca09aG0021900	PP
1.67389514875234e-37	0.717661474524422	0.266	0.173	7.81206865922718e-33	Crsca08aG0262700	PP
4.83252449323661e-37	0.524013077613082	0.332	0.227	2.25533918099353e-32	Crsca12aG0040800	PP
7.87819482870575e-37	0.448210571948559	0.371	0.258	3.67675352655697e-32	Crsca02aG0001400	PP
1.76167696243594e-36	0.665205394336538	0.471	0.347	8.22174638368854e-32	Crsca05aG0087900	PP
4.54409868776456e-36	0.470883582057957	0.412	0.298	2.12073085757972e-31	Crsca17aG0174000	PP
9.86943605388342e-36	0.624395389564351	0.413	0.304	4.60606580634739e-31	Crsca09aG0153900	PP
1.04680834273739e-35	0.505169463107548	0.311	0.21	4.88545453555541e-31	Crsca16aG0192100	PP
1.42765757562814e-35	0.473385458951593	0.534	0.407	6.66287790545651e-31	Crsca13aG0157800	PP
2.09037492418635e-35	0.724567939356505	0.315	0.217	9.75577977117769e-31	Crsca13aG0060000	PP
2.44589366164912e-35	0.44884941923726	0.323	0.218	1.14149857189165e-30	Crsca04aG0175700	PP
4.46392750257286e-35	0.463621554749897	0.388	0.276	2.08331496545075e-30	Crsca02aG0324400	PP
1.0374303110827e-34	0.463034266510517	0.274	0.177	4.84168726182296e-30	Crsca06aG0023700	PP
5.34203272954018e-34	0.462539335619423	0.443	0.327	2.4931266748764e-29	Crsca07aG0085300	PP
9.87065378193244e-34	0.502659436704698	0.272	0.179	4.60663412002787e-29	Crsca01aG0056500	PP
8.66874339392035e-33	0.355158868618135	0.458	0.337	4.04570254194263e-28	Crsca03aG0056900	PP
1.32185317366606e-32	0.617809886032063	0.325	0.228	6.16908876149949e-28	Crsca04aG0334200	PP
2.68439155000267e-32	0.422751321242497	0.294	0.197	1.25280553638625e-27	Crsca06aG0268800	PP
2.90541086583976e-32	0.603035962599841	0.253	0.166	1.35595525108742e-27	Crsca16aG0149300	PP
3.19770031508849e-32	0.29990690887429	0.729	0.604	1.4923667370518e-27	Crsca15aG0078600	PP
3.66473029947452e-32	0.327197672187763	0.411	0.294	1.71032963076476e-27	Crsca17aG0101600	PP
4.07323311113028e-32	0.353319258252115	0.263	0.17	1.9009778929645e-27	Crsca11aG0040900	PP
7.83504921857866e-32	0.437911060614622	0.319	0.219	3.65661747031066e-27	Crsca16aG0054200	PP
3.32723789180132e-31	0.339998755612026	0.874	0.777	1.55282192410368e-26	Crsca02aG0034900	PP
3.86228659081491e-31	0.357922167431076	0.461	0.345	1.80252915193332e-26	Crsca12aG0092600	PP
4.14357262045694e-31	0.52740869359354	0.313	0.219	1.93380534196725e-26	Crsca14aG0009300	PP
1.34783187917816e-30	0.310834088085404	0.421	0.304	6.29033138012448e-26	Crsca15aG0005400	PP
2.21035375977924e-30	0.529325406657723	0.316	0.221	1.03157209968897e-25	Crsca15aG0182600	PP
2.32504353176023e-30	0.35839135193938	0.393	0.284	1.0850978162725e-25	Crsca17aG0015800	PP
2.60963118672383e-30	0.354780381102952	0.305	0.207	1.21791487484401e-25	Crsca08aG0198600	PP
6.2809745033765e-30	0.363972078500953	0.379	0.272	2.93133080072581e-25	Crsca12aG0137200	PP
3.96715954286748e-29	0.39434650338957	0.379	0.278	1.85147335865625e-24	Crsca09aG0203800	PP
5.68545968457518e-29	0.349879007279884	0.373	0.269	2.65340403479124e-24	Crsca03aG0272800	PP
1.28300075133199e-28	0.571890586303753	0.299	0.206	5.98776450646638e-24	Crsca14aG0165700	PP
2.1806089173648e-28	0.500232681306267	0.496	0.39	1.01769018173415e-23	Crsca13aG0099000	PP
4.50378539076946e-28	0.476110285389787	0.758	0.65	2.10191664187211e-23	Crsca09aG0206400	PP
4.10841146320538e-27	0.333241685511502	0.342	0.244	1.91739562987795e-22	Crsca11aG0048000	PP
4.70113440818929e-27	0.404167555585027	0.369	0.271	2.19401942830194e-22	Crsca14aG0199100	PP
1.04513510043391e-26	0.371444497030551	0.381	0.28	4.87764551372507e-22	Crsca06aG0199200	PP
2.56766081400705e-26	0.413945567915651	0.451	0.347	1.19832730189709e-21	Crsca14aG0225500	PP
4.29753621250085e-26	0.302540871475867	0.281	0.193	2.00566015037415e-21	Crsca08aG0218500	PP
9.36985165540238e-26	0.369503164728436	0.347	0.253	4.37290976757629e-21	Crsca07aG0202000	PP
1.10679996552123e-24	0.327127432108973	0.421	0.317	5.16543543908759e-20	Crsca04aG0002900	PP
4.06641071223231e-23	0.441546897520284	0.36	0.272	1.89779387939882e-18	Crsca15aG0136400	PP
6.25418807811611e-23	0.353585980358512	0.275	0.193	2.91882957605679e-18	Crsca05aG0042900	PP
2.15938756493259e-22	0.324856674774518	0.257	0.179	1.00778617655404e-17	Crsca14aG0225800	PP
4.28979456794496e-22	0.353312318405461	0.251	0.176	2.00204712485991e-17	Crsca03aG0074200	PP
1.43949822628732e-21	0.250935708923533	0.25	0.174	6.71813822208291e-17	Crsca09aG0059900	PP
1.44319363988268e-21	0.337658759400087	0.264	0.187	6.73538471733249e-17	Crsca01aG0018500	PP
1.63238711433485e-21	0.41729188827783	0.333	0.248	7.61835066260074e-17	Crsca15aG0229400	PP
5.02531261465607e-21	0.284714163995427	0.253	0.178	2.34531339725999e-16	Crsca05aG0011900	PP
6.87951412403487e-21	0.250514002387318	0.365	0.275	3.21066924168707e-16	Crsca03aG0231000	PP
1.74509872397137e-20	0.301735342066822	0.265	0.189	8.1443757447744e-16	Crsca16aG0226300	PP
1.90882245634213e-20	0.373037725840853	0.252	0.179	8.90847440374873e-16	Crsca15aG0035000	PP
3.09576483517156e-19	0.298684491877604	0.277	0.2	1.44479344857457e-14	Crsca05aG0102900	PP
8.55446245961185e-19	0.32538854085081	0.251	0.181	3.99236762990085e-14	Crsca14aG0052300	PP
1.55198041626629e-18	0.281607001954604	0.262	0.189	7.24309260271479e-14	Crsca10aG0065000	PP
3.72601289619165e-18	0.344457644434034	0.399	0.315	1.73893021865264e-13	Crsca03aG0155400	PP
1.65265909238585e-17	0.297314278924443	0.256	0.188	7.71295998416477e-13	Crsca05aG0039700	PP
1.12750424616969e-16	0.259503973548608	0.269	0.2	5.26206231687396e-12	Crsca06aG0248200	PP
1.37484398116055e-16	0.4482948509788	0.292	0.224	6.41639686007629e-12	Crsca11aG0062300	PP
3.96528020189285e-16	0.323731437884136	0.35	0.274	1.85059627022339e-11	Crsca16aG0115400	PP
4.61411262742073e-16	0.262442952810041	0.257	0.19	2.15340636321725e-11	Crsca11aG0183300	PP
4.11321272454063e-14	0.281510174193073	0.36	0.288	1.91963637854311e-09	Crsca03aG0300300	PP
4.55451860299797e-12	0.70993407388844	0.541	0.469	2.12559383201915e-07	Crsca05aG0189500	PP
4.67751252379154e-12	0.292083263549005	0.278	0.219	2.18299509485351e-07	Crsca14aG0106200	PP
1.16997349272506e-10	0.281583306967641	0.269	0.215	5.46026629054787e-06	Crsca09aG0238900	PP
1.35902154818638e-10	0.276856354492488	0.252	0.199	6.34255356538582e-06	Crsca17aG0232800	PP
4.21322671798594e-10	0.521684501168514	0.279	0.227	1.96631290928404e-05	Crsca12aG0087300	PP
2.33005874425879e-09	0.262183453266247	0.271	0.219	0.000108743841594558	Crsca01aG0225100	PP
6.80519062426224e-05	0.406872774696124	0.25	0.227	1	Crsca04aG0324900	PP
0	2.11942326343754	0.614	0.301	0	Crsca06aG0026300	MC
0	1.75413463237074	0.721	0.431	0	CrscaPtG0004700	MC
0	1.36516653337674	0.782	0.509	0	CrscaPtG0000100	MC
0	1.31635635097743	0.862	0.595	0	CrscaPtG0002900	MC
0	2.4119284631384	0.409	0.147	0	Crsca11aG0017000	MC
0	1.36110109805446	0.648	0.416	0	CrscaPtG0002800	MC
0	2.56380053095014	0.307	0.097	0	Crsca11aG0263000	MC
0	1.19413969721331	0.647	0.443	0	CrscaPtG0003200	MC
0	1.80802667892569	0.385	0.184	0	Crsca03aG0006000	MC
0	1.14320349367483	0.813	0.615	0	Crsca14aG0220700	MC
0	1.46665281387268	0.494	0.297	0	Crsca08aG0218700	MC
0	1.34758107066372	0.531	0.341	0	Crsca09aG0210600	MC
0	1.07787642049186	0.662	0.475	0	CrscaPtG0003100	MC
0	1.86933	0.333	0.157	0	Crsca12aG0141100	MC
0	1.12588983551349	0.554	0.379	0	Crsca08aG0203900	MC
0	1.80751504553378	0.345	0.171	0	Crsca05aG0029500	MC
0	1.57533	0.4	0.227	0	CrscaPtG0000700	MC
0	1.34733712008951	0.448	0.281	0	Crsca06aG0049500	MC
0	2.0370231426765	0.281	0.116	0	Crsca04aG0021500	MC
0	1.5942635281655	0.366	0.201	0	Crsca16aG0095100	MC
0	1.98617939438401	0.255	0.091	0	Crsca07aG0000200	MC
0	0.818976322589099	0.811	0.654	0	CrscaPtG0002400	MC
0	0.82317426520533	0.918	0.765	0	CrscaPtG0004600	MC
0	1.25415488814004	0.613	0.461	0	Crsca08aG0239500	MC
0	1.06468581054025	0.617	0.484	0	Crsca14aG0044500	MC
0	0.833597096977014	0.764	0.641	0	CrscaPtG0002200	MC
0	0.929737299025485	0.887	0.772	0	Crsca03aG0221800	MC
0	0.65631012327459	0.87	0.775	0	Crsca02aG0254100	MC
0	0.779956949981092	0.786	0.719	0	Crsca05aG0077800	MC
0	0.660817674332671	0.995	0.982	0	Crsca08aG0038800	MC
5.91057253786408e-316	1.06472348997246	0.573	0.448	2.75846420342117e-311	Crsca02aG0065300	MC
1.80266223343879e-315	0.940483056024599	0.642	0.518	8.41302464345883e-311	Crsca13aG0028600	MC
2.27027792837093e-298	1.32805841308362	0.442	0.29	1.05953870917071e-293	Crsca04aG0139100	MC
1.76620180071158e-288	1.04299005879883	0.544	0.426	8.24286380392094e-284	Crsca14aG0222200	MC
4.53443884216505e-287	1.57590311004944	0.356	0.204	2.11622260763843e-282	Crsca03aG0001400	MC
1.07841488283391e-257	1.3049283634898	0.398	0.253	5.03296225818585e-253	Crsca02aG0312600	MC
6.68306459773238e-256	1.39783289850169	0.375	0.233	3.1189862477617e-251	CrscaPtG0002300	MC
5.06858027226872e-239	0.929956198677559	0.504	0.376	2.36550641306781e-234	CrscaPtG0003900	MC
3.63527424150859e-234	1.53973551632896	0.306	0.171	1.69658248851206e-229	Crsca07aG0105600	MC
4.99938166504715e-233	0.641770585260982	0.664	0.566	2.3332114230775e-228	Crsca06aG0205500	MC
1.44341351330941e-231	1.54166878486549	0.321	0.19	6.73641086661502e-227	Crsca17aG0017000	MC
5.68085376746111e-224	1.17830092012553	0.424	0.298	2.6512544532741e-219	Crsca08aG0068200	MC
1.15972346399393e-221	0.671258433761113	0.597	0.462	5.41242940645965e-217	Crsca17aG0201400	MC
2.54104729258922e-219	1.68346455509615	0.253	0.129	1.18590677145139e-214	Crsca03aG0007700	MC
1.64144783968374e-217	1.47828649018087	0.302	0.174	7.66063706780403e-213	Crsca03aG0090600	MC
2.10675737389863e-217	0.453104445637219	0.805	0.77	9.8322366639849e-213	Crsca02aG0034900	MC
9.6872764919193e-202	1.02831365004648	0.423	0.297	4.52105193877874e-197	Crsca09aG0178100	MC
1.33227595171742e-199	0.720732314422292	0.576	0.468	6.21773186666518e-195	Crsca11aG0065100	MC
2.05490471484245e-199	0.800971813542626	0.545	0.446	9.5902403041697e-195	CrscaPtG0002600	MC
1.43355891802512e-187	1.04653132633665	0.423	0.314	6.69041947042323e-183	Crsca12aG0129100	MC
6.7524046862247e-186	0.287390280642901	0.807	0.752	3.15134726706107e-181	Crsca01aG0050600	MC
2.95027622367726e-182	1.56414345700864	0.271	0.158	1.37689391359018e-177	Crsca03aG0011400	MC
1.29992206605313e-179	1.46812058138307	0.269	0.156	6.06673628226996e-175	Crsca11aG0132300	MC
8.31107279345408e-179	1.59408943759167	0.253	0.144	3.87877767270502e-174	Crsca06aG0008000	MC
2.45759878481972e-174	1.51698535007806	0.268	0.159	1.14696135287536e-169	Crsca03aG0002000	MC
1.16496542428323e-163	1.20417684922986	0.322	0.213	5.43689363512984e-159	CrscaPtG0001000	MC
2.79269008645845e-159	1.38844856482363	0.282	0.177	1.30334846335016e-154	Crsca09aG0262500	MC
1.30481992231497e-152	1.34111920156811	0.298	0.196	6.08959457744395e-148	Crsca09aG0236600	MC
9.43112369982488e-150	1.08012305858658	0.368	0.268	4.40150543070827e-145	Crsca07aG0111300	MC
1.53596253419921e-147	1.36789495864645	0.269	0.168	7.1683371471077e-143	CrscaPtG0003600	MC
6.09770032376828e-145	1.35607080637373	0.266	0.166	2.84579674110266e-140	Crsca16aG0152100	MC
2.76936110311151e-143	1.21431140371772	0.309	0.21	1.29246082682214e-138	Crsca05aG0157600	MC
8.30087138528714e-143	0.894808901103791	0.457	0.378	3.87401667551351e-138	Crsca13aG0126400	MC
1.12786536576959e-141	0.838282315763852	0.49	0.416	5.2637476620467e-137	Crsca14aG0202600	MC
4.23626619884132e-138	1.02569121806996	0.384	0.293	1.97706543499925e-133	Crsca13aG0206300	MC
4.89167066400638e-137	0.60401626061911	0.676	0.662	2.28294269889178e-132	Crsca08aG0003200	MC
8.68030830219542e-134	0.832140269510063	0.486	0.415	4.0510998846346e-129	Crsca11aG0160900	MC
3.61525136437223e-133	0.58460085559683	0.553	0.466	1.68723781175252e-128	CrscaMtG0005800	MC
6.82366436666301e-132	0.933640903742701	0.422	0.34	3.18460415992163e-127	Crsca05aG0205800	MC
2.27821396392644e-130	0.933713238679942	0.453	0.379	1.06324245696447e-125	Crsca03aG0266300	MC
8.7487222197927e-130	0.685703843641162	0.517	0.435	4.08302865997726e-125	Crsca03aG0103500	MC
4.67565760948088e-129	0.825490483388856	0.411	0.318	2.18212940634473e-124	Crsca15aG0099700	MC
6.50025225891704e-129	0.938127528215484	0.397	0.311	3.03366772923658e-124	Crsca16aG0065200	MC
3.88529651471044e-127	0.981358760729403	0.402	0.32	1.81326788341536e-122	Crsca02aG0133300	MC
1.49504996166603e-125	1.11875387136483	0.335	0.245	6.97739817109537e-121	Crsca08aG0183000	MC
3.85424483657326e-125	1.23257451485085	0.289	0.198	1.79877606522874e-120	Crsca03aG0010300	MC
1.55259195346934e-124	0.912220794534542	0.412	0.33	7.2459466468414e-120	Crsca05aG0002400	MC
4.29346357973645e-122	1.09134135435687	0.336	0.248	2.003759452663e-117	Crsca15aG0194800	MC
1.41178800215325e-120	0.557994692915062	0.703	0.673	6.58881460604921e-116	Crsca11aG0072600	MC
3.10677637962707e-120	0.811921513560081	0.469	0.405	1.44993253637195e-115	Crsca06aG0112600	MC
2.3857272743043e-118	0.646363980172269	0.576	0.543	1.11341891891782e-113	Crsca02aG0335800	MC
5.60686396807052e-118	0.938095749594041	0.373	0.288	2.61672341389851e-113	Crsca13aG0083300	MC
4.52685744077718e-117	1.1887361870415	0.271	0.182	2.11268436761071e-112	CrscaPtG0004900	MC
4.41520508845626e-115	1.11532056796297	0.297	0.209	2.06057621478254e-110	Crsca16aG0100500	MC
8.29600083849553e-114	1.23501323376115	0.263	0.176	3.87174359132586e-109	Crsca02aG0281200	MC
2.11614931095981e-113	1.0218946289962	0.339	0.254	9.87606883424943e-109	Crsca11aG0263600	MC
8.74915453015282e-109	0.777398480291775	0.474	0.415	4.08323041922232e-104	Crsca07aG0178700	MC
1.13081664801103e-108	0.636018450691411	0.548	0.499	5.27752129626749e-104	CrscaMtG0002600	MC
1.87349192530805e-106	0.576595251750401	0.624	0.61	8.74358681541269e-102	Crsca05aG0142700	MC
3.36870538652019e-106	0.462423365957187	0.627	0.591	1.57217480388897e-101	Crsca01aG0161500	MC
8.96219452762431e-105	0.973771260580794	0.34	0.26	4.18265618604227e-100	Crsca01aG0096900	MC
2.25406365988439e-103	0.675349524904637	0.525	0.48	1.05197151006804e-98	Crsca01aG0121600	MC
1.05542484637229e-102	1.21565238335453	0.253	0.172	4.92566775801946e-98	Crsca07aG0243100	MC
9.60623507222656e-102	0.763133023338727	0.367	0.284	4.48322990820814e-97	Crsca02aG0292100	MC
1.04290164539988e-101	0.881711570848878	0.386	0.313	4.86722197908126e-97	Crsca09aG0111500	MC
7.21338435151971e-101	1.1989907741344	0.253	0.172	3.36648647685425e-96	CrscaPtG0005100	MC
1.15401205560957e-100	0.637033438059491	0.472	0.398	5.38577426352986e-96	CrscaMtG0000900	MC
2.92595614969514e-99	1.16368165905512	0.266	0.185	1.36554373506272e-94	Crsca02aG0188600	MC
4.50487419918291e-95	0.621230094794613	0.464	0.392	2.10242478875866e-90	Crsca12aG0070100	MC
5.02641958378612e-95	0.886308983106107	0.347	0.27	2.34583001975298e-90	Crsca09aG0089100	MC
9.16577198966347e-95	0.676118561535711	0.44	0.371	4.27766578757594e-90	Crsca02aG0034800	MC
2.23849809943854e-94	0.779993148256305	0.429	0.366	1.04470706300797e-89	Crsca06aG0121500	MC
4.97102387316969e-94	1.10270172149155	0.324	0.254	2.31997684160829e-89	Crsca05aG0083000	MC
4.98582328183444e-92	0.522814275429089	0.5	0.423	2.32688372563213e-87	Crsca03aG0115700	MC
1.54939256830416e-91	1.02499409759479	0.299	0.224	7.23101511627552e-87	CrscaPtG0004800	MC
2.66257833217276e-91	1.18069471746452	0.25	0.175	1.24262530762503e-86	CrscaPtG0003000	MC
1.13435870277812e-89	0.703115787848668	0.466	0.411	5.29405206586548e-85	Crsca04aG0193200	MC
8.85008138560971e-89	0.69513909708362	0.518	0.478	4.13033298266405e-84	Crsca04aG0224800	MC
3.77564578485038e-88	0.819736789793324	0.39	0.324	1.76209388778967e-83	Crsca01aG0035800	MC
3.26033529150243e-84	0.914737794623451	0.336	0.267	1.52159848054418e-79	Crsca11aG0208800	MC
2.44944568447444e-82	0.88465712304386	0.341	0.272	1.14315630094422e-77	Crsca08aG0198900	MC
7.25203652935924e-80	0.665069697149671	0.52	0.493	3.38452544825196e-75	Crsca08aG0155000	MC
4.25215552485202e-79	1.01046638289602	0.295	0.227	1.98448098344844e-74	Crsca05aG0101200	MC
1.51873265490126e-78	0.884930770017796	0.349	0.286	7.08792530042416e-74	Crsca15aG0087100	MC
1.98474991712539e-78	0.76548414611479	0.364	0.297	9.26282786322418e-74	Crsca04aG0002900	MC
1.18318520034383e-77	0.875645680296141	0.353	0.293	5.52192533000467e-73	Crsca03aG0256700	MC
7.46920826282751e-77	1.08415895729964	0.251	0.183	3.4858794962616e-72	Crsca06aG0021100	MC
3.04271272947664e-76	1.06880784029893	0.291	0.226	1.42003403084675e-71	Crsca13aG0125800	MC
4.38839110114483e-74	0.966086419242979	0.304	0.24	2.04806212690429e-69	Crsca17aG0189400	MC
1.83693583638895e-73	0.608942486826999	0.531	0.505	8.57297954842721e-69	Crsca13aG0000600	MC
3.79860164161871e-71	0.832512966203764	0.351	0.292	1.77280738614345e-66	Crsca01aG0112600	MC
2.13598122204703e-70	0.885541925289848	0.314	0.252	9.96862436329348e-66	Crsca08aG0240600	MC
1.70023818154348e-69	0.920226784288486	0.3	0.237	7.93501159326341e-65	Crsca11aG0155000	MC
2.80668378832473e-69	0.989022721686991	0.292	0.231	1.30987932401115e-64	Crsca13aG0027600	MC
4.82365477631575e-69	0.834243775289567	0.367	0.314	2.25119968410656e-64	Crsca11aG0110900	MC
2.38759901792471e-68	0.70752157587391	0.436	0.397	1.11429246166546e-63	Crsca07aG0101700	MC
5.0896973374877e-67	0.841610391764936	0.348	0.293	2.37536174740551e-62	Crsca08aG0170100	MC
8.76590043272725e-67	0.734156257401294	0.399	0.347	4.09104573195381e-62	Crsca01aG0209600	MC
1.88434062174196e-66	0.603905206122423	0.56	0.548	8.79421768166972e-62	Crsca13aG0116500	MC
7.38204667409578e-65	1.01368188141514	0.261	0.2	3.4452011828005e-60	Crsca05aG0185400	MC
7.51329713108482e-65	1.00335038379561	0.263	0.202	3.50645577107729e-60	Crsca09aG0213100	MC
9.81319808708531e-64	0.890560597617798	0.311	0.254	4.57981954724271e-59	Crsca04aG0100100	MC
1.72538291808934e-63	0.99736536067439	0.261	0.201	8.05236207872293e-59	Crsca08aG0050400	MC
8.73627895377605e-63	0.79040846908107	0.372	0.325	4.07722138772728e-58	Crsca02aG0090400	MC
2.21796796944941e-61	0.766097807969827	0.379	0.332	1.03512565134204e-56	Crsca09aG0186600	MC
9.53649943067104e-60	0.749983956778034	0.384	0.34	4.45068428429418e-55	Crsca08aG0090400	MC
4.5857607859511e-59	0.93067914881606	0.28	0.223	2.14017455880338e-54	Crsca14aG0098300	MC
1.69339986186845e-58	0.738387365059545	0.309	0.251	7.90309715534006e-54	Crsca01aG0272300	MC
3.49471841916042e-58	0.703164938245077	0.401	0.36	1.63098508622217e-53	Crsca02aG0208600	MC
5.92552337108223e-58	0.809767687344219	0.354	0.308	2.76544175728408e-53	Crsca16aG0117000	MC
1.21787780535388e-57	0.758507484577374	0.343	0.29	5.68383571758655e-53	Crsca05aG0018300	MC
1.79333426297848e-56	0.708327019919195	0.344	0.291	8.36949100532057e-52	Crsca08aG0231800	MC
3.12337186161683e-55	0.661373433121629	0.435	0.407	1.45767764781657e-50	Crsca02aG0024300	MC
9.7169017117796e-55	0.796090738085935	0.344	0.298	4.53487802888754e-50	Crsca14aG0208100	MC
1.25290592819576e-54	0.89891115818893	0.265	0.211	5.84731196688961e-50	Crsca08aG0198200	MC
4.77263842819455e-54	0.896242487539788	0.268	0.214	2.2273903544384e-49	Crsca08aG0205400	MC
1.07723079691611e-51	0.918509087032351	0.266	0.214	5.02743612920747e-47	Crsca03aG0027000	MC
1.25994644072381e-50	0.451013016663193	0.494	0.463	5.88017003885801e-46	Crsca15aG0004600	MC
2.6957876597921e-50	0.68111404928503	0.43	0.406	1.25812410082497e-45	Crsca07aG0168000	MC
7.90577200951904e-50	0.745273938499055	0.312	0.261	3.68962379684254e-45	Crsca03aG0075600	MC
1.10651041683331e-49	0.646330032374215	0.458	0.442	5.16408411536106e-45	Crsca01aG0067100	MC
6.16817601960072e-49	0.496507268209013	0.57	0.578	2.87868774834766e-44	Crsca02aG0154800	MC
3.77495804444578e-48	0.795886082314101	0.286	0.238	1.76177291934284e-43	Crsca02aG0218400	MC
4.08545216469536e-48	0.85577544241058	0.27	0.22	1.90668052526332e-43	Crsca14aG0062700	MC
8.38358487370211e-47	0.677338999874815	0.382	0.346	3.91261906055677e-42	Crsca11aG0193400	MC
1.25495550446031e-44	0.727908197927716	0.342	0.302	5.85687733931626e-40	Crsca10aG0187400	MC
1.6050818367367e-43	0.735318811302476	0.324	0.284	7.49091693205018e-39	Crsca15aG0210800	MC
1.38754984714629e-42	0.820574826368285	0.26	0.213	6.47569513663172e-38	Crsca11aG0003300	MC
1.741194155806e-42	0.702957943147967	0.347	0.31	8.12615312514658e-38	Crsca03aG0036400	MC
3.39930038326517e-41	0.600533078463727	0.281	0.233	1.58645348886985e-36	Crsca17aG0242000	MC
6.23481834863824e-40	0.73331929154385	0.305	0.264	2.90978972330947e-35	Crsca17aG0116800	MC
5.5417317332983e-37	0.831205215899626	0.255	0.213	2.58632619993032e-32	Crsca03aG0311000	MC
1.54905996861937e-36	0.616584998783096	0.441	0.424	7.2294628735466e-32	Crsca04aG0224100	MC
5.39038889593569e-36	0.728821056682314	0.269	0.227	2.51569449773319e-31	Crsca08aG0194600	MC
1.19104850305116e-33	0.648461150248599	0.362	0.334	5.55862336373978e-29	Crsca02aG0326500	MC
5.70591305416012e-32	0.653115669687819	0.321	0.289	2.66294962237653e-27	Crsca02aG0044100	MC
1.63835563010916e-30	0.38207767409454	0.491	0.49	7.64620572571943e-26	Crsca10aG0237000	MC
1.76353779528025e-30	0.808523268403047	0.252	0.217	8.23043089057291e-26	Crsca11aG0002800	MC
1.99105879669606e-29	0.633457298966949	0.363	0.342	9.29227140418054e-25	Crsca10aG0029900	MC
1.77153947358341e-28	0.644999720362326	0.3	0.267	8.26777472321377e-24	Crsca04aG0070700	MC
6.03082510229046e-27	0.544113777052041	0.388	0.372	2.81458607523896e-22	Crsca13aG0070200	MC
9.08648891360619e-27	0.414970662678015	0.336	0.296	4.24066437598001e-22	Crsca09aG0153900	MC
1.13295850002404e-26	0.397434302267917	0.499	0.508	5.28751731961221e-22	Crsca02aG0241100	MC
6.10334277928831e-26	0.693037663661338	0.305	0.28	2.84843007509385e-21	Crsca06aG0239300	MC
8.55251221685252e-26	0.505614670702563	0.478	0.47	3.99145745160507e-21	Crsca02aG0128700	MC
2.35477700915315e-25	0.646886736637286	0.312	0.289	1.09897443017177e-20	Crsca12aG0148200	MC
6.24997984515761e-24	0.46108748719831	0.486	0.5	2.91686559373506e-19	Crsca03aG0216800	MC
7.87681405093584e-24	0.578839690519884	0.363	0.348	3.67610911757175e-19	Crsca05aG0102800	MC
1.0824625405501e-23	0.567653605224227	0.407	0.401	5.05185267674734e-19	Crsca05aG0169300	MC
9.9793953393349e-23	0.585946036355365	0.391	0.38	4.6573838048676e-18	Crsca10aG0094200	MC
1.78575330305611e-22	0.447236694899834	0.502	0.518	8.33411066536288e-18	Crsca17aG0248300	MC
1.0279992015956e-20	0.636164864647166	0.279	0.256	4.79767227384666e-16	Crsca14aG0043100	MC
2.83425111592889e-20	0.635157199613892	0.323	0.308	1.32274499580401e-15	Crsca01aG0270700	MC
4.29035839102849e-20	0.254014973099801	0.367	0.351	2.00231026109299e-15	Crsca05aG0087900	MC
3.61391715621174e-19	0.616760582727431	0.442	0.448	1.68661513680402e-14	Crsca02aG0065400	MC
4.08670241319564e-19	0.601130857770581	0.374	0.367	1.90726401623841e-14	Crsca17aG0159900	MC
1.17917378057351e-18	0.589275064013572	0.355	0.345	5.50320403393658e-14	Crsca11aG0035200	MC
1.42468736488053e-18	0.417382949001531	0.521	0.547	6.64901593189741e-14	Crsca03aG0199400	MC
4.30163181607681e-18	0.630775709413701	0.257	0.235	2.00757156856305e-13	Crsca08aG0197200	MC
6.74365886181106e-18	0.512211255263652	0.324	0.305	3.14726559080722e-13	Crsca01aG0095300	MC
4.06259713546962e-16	0.569560581878732	0.286	0.269	1.89601408312367e-11	Crsca07aG0195100	MC
4.18931003178936e-16	0.591971882941675	0.322	0.313	1.95515099183609e-11	Crsca10aG0245000	MC
1.0451863032424e-15	0.499402980249634	0.255	0.231	4.87788447723229e-11	Crsca09aG0183400	MC
1.465919255177e-15	0.646146769412908	0.263	0.244	6.84144516391106e-11	Crsca11aG0204000	MC
3.05359599210542e-15	0.52635766199169	0.264	0.242	1.4251132495156e-10	Crsca17aG0251200	MC
3.36316413254144e-14	0.508076564179119	0.396	0.401	1.56958870065709e-09	Crsca13aG0185500	MC
3.6170117972499e-14	0.618989273834648	0.358	0.358	1.68805940577653e-09	Crsca05aG0033700	MC
3.52043417054786e-13	0.53266890511385	0.326	0.319	1.64298662739469e-08	Crsca11aG0168600	MC
5.51030123986942e-13	0.431705896896408	0.313	0.298	2.57165758864706e-08	Crsca17aG0101600	MC
1.43875554472968e-12	0.374750230428593	0.415	0.42	6.71467212725341e-08	Crsca16aG0175200	MC
4.23039302764811e-12	0.489965103102777	0.303	0.294	1.97432442600337e-07	CrscaMtG0001400	MC
5.8760960379937e-12	0.343785461479169	0.252	0.234	2.74237402093166e-07	Crsca17aG0242100	MC
3.75203629104638e-11	0.427515982482958	0.32	0.311	1.75107533703135e-06	Crsca15aG0005400	MC
3.04824770397652e-10	0.321949735175519	0.494	0.525	1.42261720344584e-05	Crsca09aG0143100	MC
6.99666664117111e-10	0.529868682858929	0.254	0.243	3.26534432143456e-05	CrscaMtG0006400	MC
7.2170559749791e-10	0.422674402793959	0.457	0.472	3.36820002352274e-05	Crsca04aG0281900	MC
6.9874067088759e-09	0.537176442872319	0.334	0.336	0.000326102271103238	Crsca10aG0195200	MC
7.79203946730311e-09	0.321133958152989	0.471	0.561	0.000363654481939036	Crsca04aG0140400	MC
1.98985854743485e-08	0.539415623247928	0.253	0.245	0.000928666984087845	Crsca16aG0094200	MC
3.92292677740437e-08	0.354750533086966	0.381	0.386	0.00183082992701462	Crsca14aG0225400	MC
4.61996183282157e-08	0.547665378641633	0.263	0.258	0.00215613618737783	Crsca14aG0184900	MC
9.77743083601333e-08	0.394638084767799	0.266	0.325	0.00456312697116742	Crsca05aG0162700	MC
2.71255124567829e-07	0.498840606975127	0.346	0.352	0.0126594766635806	Crsca13aG0084100	MC
4.72803930915247e-07	0.42741513316318	0.301	0.299	0.0220657594558146	Crsca12aG0132500	MC
1.00054066203048e-06	0.480428401666909	0.299	0.3	0.0466952326969627	Crsca12aG0181600	MC
3.82107226029824e-05	0.473781461498501	0.257	0.255	1	Crsca16aG0092600	MC
5.24173519999594e-05	0.301522537075825	0.278	0.323	1	Crsca02aG0209300	MC
7.45715395831233e-05	0.507986876803507	0.264	0.266	1	Crsca12aG0113300	MC
0.000158099914941381	0.465207462974036	0.269	0.272	1	Crsca04aG0280400	MC
0.00019008646089107	0.451416109963068	0.296	0.303	1	Crsca09aG0273800	MC
0.000204012379092325	0.444980397261119	0.461	0.505	1	Crsca06aG0176700	MC
0.00025460931064343	0.303040205838119	0.467	0.549	1	Crsca01aG0304700	MC
0.000443417185857098	0.28334288559264	0.273	0.272	1	Crsca05aG0092000	MC
0.000784821128734149	0.442021253655051	0.319	0.332	1	Crsca17aG0098200	MC
0.000873623294868094	0.336982808438613	0.265	0.266	1	Crsca02aG0234000	MC
0.0014815402008861	0.464274653799297	0.265	0.271	1	Crsca14aG0112800	MC
0.00346137839732496	0.310813029905397	0.222	0.255	1	Crsca05aG0070900	MC
0.00397984354751158	0.268219317577368	0.266	0.305	1	Crsca01aG0013900	MC
0.00565872157205057	0.444254549555018	0.252	0.258	1	Crsca06aG0272300	MC
0.00612446085348365	0.272194027396456	0.241	0.274	1	Crsca08aG0230800	MC
0.00658351393962969	0.257064355192879	0.242	0.274	1	Crsca03aG0130700	MC
0.0251711220467946	0.398487328140613	0.287	0.302	1	Crsca17aG0201100	MC
0.0277684809811829	0.411575168866725	0.297	0.318	1	Crsca03aG0192000	MC
0.0428838672153866	0.400371563635218	0.348	0.37	1	Crsca03aG0116800	MC
0.0453431686270053	0.361993521253584	0.248	0.254	1	Crsca16aG0214400	MC
0.0504378543315195	0.338940675845539	0.224	0.251	1	Crsca16aG0154800	MC
0.0701074909035916	0.392851079336012	0.25	0.26	1	Crsca03aG0265900	MC
0.0961017403157086	0.37794471463281	0.304	0.324	1	Crsca17aG0115100	MC
0.118049240977641	0.418236513209019	0.256	0.269	1	Crsca05aG0174800	MC
0.266152488773697	0.292833793101896	0.302	0.337	1	Crsca11aG0261300	MC
0.394420569084708	0.250223936140415	0.241	0.25	1	Crsca05aG0185600	MC
0.445590125656629	0.368099211457863	0.427	0.484	1	Crsca10aG0015600	MC
0.694234101258964	0.42224587033727	0.544	0.619	1	Crsca09aG0160600	MC
0.738931791911774	0.280672075050113	0.268	0.291	1	Crsca09aG0170900	MC
0.766427180863163	0.298107941815251	0.418	0.462	1	Crsca06aG0095700	MC
0.924043038180967	0.37376707399706	0.573	0.653	1	Crsca01aG0291400	MC
0	1.6350275240786	0.612	0.298	0	Crsca12aG0163100	PC
0	2.28559932033036	0.415	0.101	0	Crsca07aG0013600	PC
0	1.92947960943903	0.503	0.193	0	Crsca12aG0156400	PC
0	1.54267588477647	0.572	0.27	0	Crsca02aG0190400	PC
0	2.78956540557476	0.697	0.397	0	Crsca04aG0246900	PC
0	2.61055282092619	0.38	0.093	0	Crsca01aG0102700	PC
0	2.29637064945897	0.421	0.134	0	Crsca04aG0015000	PC
0	3.71514772833541	0.334	0.049	0	Crsca10aG0144500	PC
0	2.30621869543353	0.429	0.147	0	Crsca03aG0217300	PC
0	2.59884593254398	0.347	0.067	0	Crsca13aG0048700	PC
0	1.71088421427539	0.494	0.217	0	Crsca03aG0114200	PC
0	2.39389564816446	0.361	0.089	0	Crsca02aG0218800	PC
0	1.90817065908626	0.406	0.134	0	Crsca08aG0101100	PC
0	3.81276356918903	0.308	0.038	0	Crsca13aG0244500	PC
0	1.34847513432461	0.49	0.222	0	Crsca03aG0151500	PC
0	1.52571628101644	0.618	0.352	0	Crsca17aG0250300	PC
0	2.18230670247484	0.47	0.206	0	Crsca06aG0186700	PC
0	2.46123138388517	0.374	0.114	0	Crsca02aG0182900	PC
0	2.25441311499098	0.328	0.08	0	Crsca17aG0135400	PC
0	1.75284990891078	0.442	0.2	0	Crsca06aG0141300	PC
0	3.74666793468291	0.285	0.044	0	Crsca06aG0057100	PC
0	1.61582766890758	0.403	0.163	0	Crsca07aG0041100	PC
0	2.61095	0.3	0.063	0	Crsca06aG0097500	PC
0	1.67230361861616	0.39	0.155	0	Crsca09aG0195700	PC
0	2.65774638197241	0.277	0.048	0	Crsca14aG0046400	PC
0	2.57219907072832	0.342	0.122	0	Crsca01aG0034900	PC
0	2.81466185355918	0.284	0.071	0	Crsca06aG0129400	PC
0	2.36631377338172	0.308	0.097	0	Crsca14aG0209100	PC
0	2.05234704096298	0.3	0.09	0	Crsca07aG0167000	PC
0	1.28361014651802	0.865	0.661	0	Crsca15aG0003400	PC
0	2.18426922911608	0.27	0.069	0	Crsca16aG0233200	PC
0	2.22832550513445	0.293	0.094	0	Crsca06aG0267600	PC
0	2.12715027660286	0.279	0.083	0	Crsca06aG0262100	PC
0	2.44242141705211	0.256	0.063	0	Crsca07aG0225700	PC
0	1.88465395470183	0.25	0.068	0	Crsca17aG0190800	PC
0	1.90758365500788	0.252	0.071	0	Crsca05aG0038000	PC
0	2.71309160388897	0.26	0.079	0	Crsca14aG0118800	PC
0	2.80284335738512	0.25	0.073	0	Crsca12aG0101600	PC
7.59971776433005e-320	1.91907029082642	0.264	0.079	3.54678828061284e-315	Crsca16aG0152600	PC
1.69013434588895e-317	1.83267261184302	0.281	0.088	7.88785699226371e-313	Crsca04aG0068700	PC
4.05003862844442e-311	1.46060980125936	0.481	0.232	1.89015302789501e-306	Crsca16aG0192200	PC
3.11955001957832e-307	1.66677218054377	0.336	0.124	1.4558939941372e-302	Crsca05aG0156000	PC
1.09841524391722e-302	1.20081739547975	0.824	0.61	5.12630394336166e-298	Crsca07aG0130000	PC
1.89065968587018e-299	1.49430993809655	0.7	0.469	8.82370875395614e-295	Crsca04aG0333700	PC
4.49861247306794e-292	2.12779901977871	0.257	0.082	2.09950244118081e-287	Crsca06aG0048000	PC
7.40248200947527e-289	1.02861339317833	0.714	0.458	3.45473835382211e-284	Crsca04aG0002300	PC
3.69266988062383e-279	1.52004914390711	0.417	0.192	1.72336903328714e-274	Crsca05aG0027700	PC
6.5922530731154e-273	1.31653391480973	0.519	0.279	3.07660450922296e-268	Crsca07aG0050800	PC
1.1987254107513e-270	1.29563426087516	0.44	0.207	5.5944514919763e-266	Crsca09aG0064400	PC
4.29604275113531e-269	0.711501134878032	0.744	0.46	2.00496315195485e-264	Crsca12aG0024400	PC
1.23039049969098e-257	1.10593442021314	0.526	0.284	5.74223246205782e-253	Crsca13aG0146000	PC
4.47027032101566e-256	1.0878114962428	0.902	0.756	2.08627515881801e-251	Crsca01aG0050600	PC
1.89730143294408e-255	1.07519584857638	0.497	0.254	8.85470578755004e-251	Crsca12aG0084600	PC
1.97716981950601e-254	0.958444031930754	0.554	0.301	9.22745154763456e-250	Crsca10aG0173000	PC
2.4465675083714e-253	1.55156955243499	0.475	0.251	1.14181305615693e-248	Crsca01aG0155400	PC
3.71232863492476e-247	2.10346915004739	0.342	0.153	1.73254377391938e-242	Crsca17aG0197700	PC
4.64799231003243e-247	1.4745708756516	0.268	0.094	2.16921801109214e-242	Crsca03aG0311800	PC
2.61375059012383e-245	1.95505368428057	0.262	0.096	1.21983740041079e-240	Crsca08aG0067700	PC
5.91380302265717e-245	1.09564606858649	0.578	0.347	2.7599718706741e-240	Crsca04aG0015500	PC
8.55413716545087e-239	1.72730571978087	0.55	0.327	3.99221581511592e-234	Crsca11aG0130300	PC
1.50224550939912e-220	1.17432648534561	0.491	0.278	7.01097979236569e-216	Crsca06aG0059100	PC
4.38220986839333e-220	0.899372718068701	0.607	0.373	2.04517734557917e-215	Crsca15aG0033100	PC
3.30382615409649e-219	1.35278996309071	0.693	0.502	1.54189566611683e-214	Crsca14aG0212300	PC
1.18568374856007e-218	1.45191455777683	0.308	0.129	5.53358605452983e-214	Crsca06aG0164300	PC
4.39133268829763e-217	1.20062715091117	0.411	0.203	2.04943496562851e-212	Crsca07aG0189000	PC
7.3065289487257e-217	1.5135930738818	0.427	0.23	3.40995706037028e-212	Crsca07aG0130200	PC
7.91246521263604e-217	2.6830263402675	0.271	0.111	3.69274751473724e-212	Crsca01aG0005500	PC
1.68588105805874e-212	1.61203204209011	0.45	0.249	7.86800689796015e-208	Crsca13aG0228800	PC
1.85302803229592e-207	1.55191728168471	0.309	0.136	8.64808182672508e-203	Crsca01aG0128600	PC
1.71555894066105e-203	1.30508449700911	0.321	0.141	8.00651357606513e-199	Crsca11aG0202900	PC
2.42399318097429e-203	0.697306000888344	0.589	0.344	1.1312776175607e-198	Crsca03aG0331200	PC
2.01066952444093e-201	1.43970671611035	0.499	0.304	9.38379467056582e-197	Crsca03aG0076000	PC
1.53871839117355e-199	1.2007947054973	0.435	0.234	7.18119873160696e-195	Crsca04aG0069000	PC
2.21672120779619e-196	1.43523944144284	0.282	0.119	1.03454378767848e-191	Crsca13aG0253700	PC
4.8502177649249e-195	2.15519063570046	0.291	0.128	2.26359663089045e-190	Crsca09aG0247700	PC
3.01575847717438e-192	0.714332879518353	0.744	0.553	1.40745448129728e-187	Crsca10aG0044700	PC
1.23307699295297e-189	1.46729351269668	0.289	0.127	5.75477032611152e-185	Crsca16aG0205400	PC
1.34897475981882e-186	0.850534185537785	0.616	0.398	6.29566520407441e-182	Crsca11aG0121900	PC
6.13062572989538e-185	0.83602328904991	0.565	0.347	2.86116302814217e-180	Crsca01aG0244300	PC
9.91061008446186e-184	1.01801043149188	0.463	0.267	4.62528172641835e-179	Crsca10aG0240800	PC
9.82242205583964e-182	0.716720632190307	0.703	0.485	4.58412437346036e-177	Crsca14aG0012400	PC
1.06855526758957e-179	1.16518257632239	0.278	0.119	4.98694743384052e-175	Crsca04aG0258100	PC
4.14312073498405e-177	1.04705250068654	0.349	0.169	1.93359444701706e-172	Crsca14aG0110600	PC
9.48907338605465e-176	0.789686896658624	0.545	0.341	4.42855054927171e-171	Crsca10aG0150000	PC
3.05808661811712e-175	1.00446486703717	0.519	0.323	1.42720902467526e-170	Crsca02aG0139700	PC
1.5296674638831e-172	0.88294625029931	0.47	0.274	7.13895805394244e-168	Crsca03aG0333800	PC
1.7158272359682e-172	1.19645583459347	0.326	0.159	8.00776571026357e-168	Crsca07aG0101600	PC
8.04022068959415e-164	0.906035050387436	0.475	0.279	3.75237099583359e-159	Crsca08aG0096800	PC
7.35031389363144e-161	1.19282137608174	0.324	0.159	3.43039149415779e-156	Crsca05aG0191900	PC
2.11831366714479e-160	1.15000378907733	0.286	0.136	9.88616988456473e-156	Crsca07aG0240900	PC
3.48994305707655e-160	1.46722242346913	0.261	0.117	1.62875642473763e-155	Crsca11aG0029100	PC
4.6365003105001e-159	1.01543387769282	0.319	0.154	2.1638546949104e-154	Crsca12aG0143700	PC
3.12903967436009e-156	0.810169048645358	0.502	0.31	1.46032281602385e-151	Crsca10aG0198900	PC
6.99820753157285e-154	1.44456954562454	0.26	0.118	3.26606345498505e-149	Crsca01aG0068700	PC
2.01238559287125e-153	0.428174612686972	0.707	0.498	9.39180356193015e-149	Crsca11aG0259500	PC
6.41576538613987e-152	1.31540135393457	0.253	0.114	2.99423770571148e-147	Crsca07aG0131200	PC
1.44927561511805e-149	0.69980230168184	0.584	0.388	6.76376929575596e-145	Crsca04aG0143400	PC
4.16068996515946e-149	0.97666637721387	0.329	0.166	1.94179400673992e-144	Crsca13aG0238100	PC
9.2969899389963e-147	0.938924230480071	0.554	0.389	4.33890520452958e-142	Crsca05aG0124800	PC
2.96695741760453e-146	1.31146582066705	0.258	0.12	1.38467902679603e-141	Crsca10aG0199300	PC
8.85345861408672e-145	1.33236007031219	0.259	0.121	4.13190913519427e-140	Crsca06aG0141700	PC
8.57508385629385e-142	1.21437712111898	0.355	0.195	4.00199163573234e-137	Crsca06aG0127900	PC
3.95270992134519e-141	0.9936996003773	0.485	0.311	1.8447297202918e-136	Crsca05aG0195100	PC
7.31499322835117e-138	2.2796902987486	0.25	0.12	3.41390733967149e-133	Crsca15aG0123600	PC
9.18422179274974e-138	1.18968523006369	0.26	0.123	4.2862763106763e-133	Crsca14aG0088700	PC
3.27751780043365e-137	1.32632866931695	0.266	0.13	1.52961755746238e-132	Crsca03aG0045000	PC
9.33750607867603e-136	1.16821275205901	0.299	0.153	4.3578140869181e-131	Crsca08aG0166400	PC
7.94557099322174e-131	0.829790083883146	0.373	0.21	3.70819798253659e-126	Crsca06aG0050900	PC
4.64863721211445e-130	0.898973435258766	0.338	0.181	2.16951898689381e-125	Crsca17aG0232800	PC
8.22210397880031e-130	0.373736133986903	0.73	0.542	3.83725592690611e-125	Crsca04aG0318700	PC
1.17388219803783e-129	1.14227373222278	0.255	0.121	5.47850821824256e-125	Crsca12aG0025600	PC
1.52598322662431e-126	0.989716153886294	0.285	0.143	7.12176371865568e-122	Crsca12aG0234000	PC
1.38575083769957e-125	0.627980177301926	0.541	0.354	6.46729915954391e-121	Crsca17aG0140200	PC
1.78897267796767e-125	1.14889269461061	0.297	0.157	8.34913548807513e-121	Crsca16aG0054900	PC
1.94181566014478e-125	0.829334455337676	0.414	0.248	9.06245368589568e-121	Crsca08aG0021100	PC
3.22576072134155e-124	0.742684790256078	0.49	0.318	1.5054625286501e-119	Crsca03aG0171000	PC
8.31163242192153e-123	0.541838947774978	0.674	0.485	3.87903885131078e-118	Crsca10aG0055600	PC
1.27227318723145e-120	0.912803138151854	0.339	0.189	5.93769896480917e-116	Crsca02aG0013100	PC
2.08771596351783e-120	0.456618072635924	0.544	0.348	9.7433704017377e-116	Crsca11aG0055800	PC
3.82382961363946e-120	1.0828286517893	0.302	0.162	1.78458128068554e-115	Crsca01aG0040500	PC
3.82591715182432e-119	0.982009003956232	0.369	0.221	1.78555553475641e-114	Crsca12aG0009500	PC
2.49140193502669e-118	0.761449243827446	0.586	0.417	1.16273728307695e-113	Crsca16aG0075100	PC
2.24244058855982e-117	0.784601696437583	0.392	0.234	1.04654702268087e-112	Crsca13aG0005800	PC
5.33568627155069e-116	0.920560885616883	0.687	0.545	2.49016478293271e-111	Crsca06aG0229000	PC
1.05566161555625e-115	0.886928980748239	0.427	0.267	4.92677275980104e-111	Crsca06aG0199200	PC
1.57326551035654e-115	0.984030841524754	0.325	0.182	7.34243013683398e-111	Crsca09aG0246500	PC
1.21701060269291e-114	0.962832742246609	0.323	0.179	5.67978848276782e-110	Crsca11aG0169700	PC
4.02111813895101e-114	0.74021567416813	0.377	0.218	1.87665583544843e-109	Crsca02aG0014900	PC
2.76636832044626e-113	1.07068574320202	0.365	0.22	1.29106409515227e-108	Crsca14aG0085100	PC
8.13844046678305e-113	0.845699008274391	0.421	0.263	3.79821016584765e-108	Crsca06aG0147300	PC
9.50134018493638e-113	0.970735635488236	0.385	0.239	4.43427546430981e-108	Crsca02aG0311300	PC
2.25974447999497e-112	0.831593815258171	0.398	0.245	1.05462274881365e-107	Crsca16aG0080500	PC
2.33087322740378e-111	1.01560818135056	0.281	0.149	1.08781853522935e-106	Crsca07aG0133100	PC
2.63328165195058e-111	0.661139277627349	0.546	0.38	1.22895254696533e-106	Crsca08aG0072900	PC
1.26918498023738e-110	0.625159681498508	0.556	0.387	5.92328630276785e-106	Crsca02aG0043100	PC
9.21196231094872e-110	1.06369498570356	0.361	0.222	4.29922281051977e-105	Crsca10aG0065700	PC
1.04302412223418e-109	0.499853865072109	0.801	0.646	4.86779357846692e-105	Crsca12aG0069800	PC
1.14319447491198e-107	1.02320731056262	0.275	0.148	5.33528861441422e-103	Crsca17aG0212900	PC
1.24666704410593e-107	0.517346760208104	0.483	0.314	5.81819509484238e-103	Crsca07aG0209000	PC
5.06474416792547e-107	0.831596997491806	0.397	0.245	2.36371610317082e-102	Crsca06aG0197000	PC
8.04868316613821e-107	0.853640304169897	0.371	0.225	3.7563204336367e-102	Crsca15aG0157300	PC
1.39263594365162e-106	0.564840880895742	0.578	0.405	6.49943194902212e-102	Crsca16aG0175100	PC
3.16429958732511e-105	0.590017977057751	0.372	0.215	1.47677861740463e-100	Crsca03aG0304500	PC
4.74514647595243e-105	1.01615300936892	0.259	0.135	2.214559860327e-100	Crsca07aG0200600	PC
8.0456856622584e-105	0.872049013422536	0.436	0.287	3.754921498576e-100	Crsca04aG0202200	PC
1.05963217583733e-104	0.696243376247482	0.28	0.148	4.9453033646328e-100	Crsca09aG0217800	PC
3.71370405205494e-104	0.441179846282588	0.503	0.328	1.73318568109404e-99	Crsca13aG0119300	PC
2.90339430249585e-103	0.749311255334236	0.365	0.217	1.35501412097482e-98	Crsca03aG0049900	PC
1.50748362339922e-102	0.956423595186239	0.307	0.174	7.03542607040417e-98	Crsca04aG0195100	PC
3.64224927437158e-102	0.95997155699369	0.315	0.184	1.69983773634922e-97	Crsca15aG0237500	PC
3.64862268762392e-102	0.507730946651654	0.761	0.611	1.70281220831408e-97	Crsca16aG0143600	PC
7.74749931917358e-101	0.349876860008957	0.587	0.405	3.61575793225831e-96	Crsca17aG0175900	PC
9.46737945129469e-100	0.727490181224102	0.424	0.273	4.41842598991923e-95	Crsca01aG0225300	PC
1.06953068856367e-99	0.554234401557847	0.584	0.422	4.99149972352667e-95	Crsca04aG0219600	PC
1.29947989795679e-99	0.930006109488596	0.297	0.167	6.06467268376434e-95	Crsca16aG0180600	PC
7.75363267481217e-99	0.58124115559787	0.443	0.284	3.61862036933484e-94	Crsca16aG0149600	PC
1.57215111537627e-97	0.877373983480087	0.44	0.292	7.33722925546104e-93	Crsca06aG0141200	PC
2.446406671052e-97	0.866267383491853	0.372	0.235	1.14173799337997e-92	Crsca06aG0274700	PC
2.72528217515558e-97	0.599574009573948	0.801	0.676	1.27188919114511e-92	Crsca17aG0138700	PC
1.02912357436478e-96	0.926445500943145	0.27	0.147	4.80291972156044e-92	Crsca09aG0108000	PC
1.39976178434621e-96	0.409278613703531	0.743	0.595	6.53268824754374e-92	Crsca15aG0078600	PC
2.4503286324159e-96	0.861878808401625	0.34	0.205	1.1435683727485e-91	Crsca01aG0225100	PC
3.23650165359489e-96	1.05338718822413	0.268	0.147	1.51047532173273e-91	Crsca03aG0158400	PC
5.1003012959758e-96	0.575777381500206	0.522	0.36	2.3803106148319e-91	Crsca09aG0133400	PC
2.2791807944198e-95	0.614973863156025	0.441	0.286	1.06369367675572e-90	Crsca01aG0027100	PC
1.31319485075088e-93	0.697622882041751	0.322	0.186	6.12868036845434e-89	Crsca05aG0098500	PC
8.94090024581835e-93	0.978148013128871	0.271	0.15	4.17271814472342e-88	Crsca02aG0142400	PC
1.33368473778951e-92	0.801694977829611	0.838	0.789	6.22430667126365e-88	Crsca10aG0244300	PC
2.72548809903957e-92	0.790825940048111	0.256	0.137	1.27198529582177e-87	Crsca16aG0070700	PC
4.62593747223409e-92	0.636406321933366	0.308	0.174	2.15892501829165e-87	Crsca07aG0043700	PC
4.23949862628502e-91	0.513073966884756	0.446	0.289	1.97857400888722e-86	Crsca02aG0293200	PC
5.67938518498585e-91	0.696752484486299	0.521	0.38	2.6505690658329e-86	Crsca13aG0099000	PC
7.00755585551105e-91	0.788065820949529	0.348	0.215	3.27042631776701e-86	Crsca02aG0005200	PC
2.09754849501106e-90	0.697380761428076	0.372	0.23	9.78925882621661e-86	Crsca14aG0213400	PC
3.58725572325333e-90	0.618859018616868	0.553	0.402	1.67417224604233e-85	Crsca11aG0216700	PC
7.14951600625361e-90	0.829565665772106	0.264	0.145	3.33667912011856e-85	Crsca15aG0017500	PC
1.58914166078501e-89	0.565511133377159	0.547	0.398	7.41652413088364e-85	Crsca13aG0157800	PC
1.14542268480005e-88	0.748284783395721	0.489	0.355	5.34568766996184e-84	Crsca12aG0028900	PC
1.48490845672172e-87	0.352189025669942	0.431	0.269	6.93006776752025e-83	Crsca07aG0197500	PC
1.29847340486982e-85	0.348759995290225	0.67	0.493	6.05997538052746e-81	Crsca11aG0121800	PC
9.87788464543216e-85	0.623172520354809	0.372	0.233	4.61000876402319e-80	Crsca05aG0194300	PC
6.40388562114788e-84	0.691824437282342	0.361	0.227	2.98869341938972e-79	Crsca06aG0260000	PC
1.02376821479534e-83	0.432070419606188	0.585	0.424	4.77792625844985e-79	Crsca10aG0171700	PC
1.20950519269082e-83	0.622209327730703	0.38	0.242	5.64476073428807e-79	Crsca13aG0067600	PC
2.14064616002694e-82	0.591961612683356	0.427	0.286	9.99039562884572e-78	Crsca11aG0189200	PC
1.13405702812046e-79	0.75529384821353	0.289	0.171	5.29264415023819e-75	Crsca15aG0005000	PC
7.97792321866591e-79	0.803454342905527	0.267	0.155	3.72329676615138e-74	Crsca13aG0136200	PC
8.23190343322668e-78	0.72171338889086	0.36	0.233	3.84182933228689e-73	Crsca06aG0138100	PC
1.74277142913113e-77	0.522213702651014	0.588	0.446	8.133514259755e-73	Crsca01aG0034800	PC
7.04799349850907e-77	1.13628728366516	0.629	0.52	3.28929856575419e-72	Crsca09aG0027800	PC
7.83467534775831e-77	0.460880309893636	0.474	0.331	3.65644298479881e-72	Crsca01aG0088500	PC
1.33548469189949e-76	0.81828133965143	0.256	0.147	6.23270705709493e-72	Crsca09aG0147000	PC
1.13681966060969e-75	0.695515288866514	0.369	0.244	5.30553735606541e-71	Crsca07aG0202000	PC
1.22617305598635e-75	0.686039891766682	0.324	0.201	5.72254965228832e-71	Crsca14aG0125800	PC
1.24697363316968e-74	0.602518205752871	0.429	0.297	5.81962594600291e-70	Crsca12aG0115800	PC
1.29790315091424e-74	0.840826610267531	0.274	0.164	6.05731400531674e-70	Crsca03aG0126900	PC
1.22235119888963e-73	0.59713334917099	0.379	0.25	5.70471304521792e-69	Crsca12aG0239400	PC
1.10003366710555e-72	0.606465827375399	0.382	0.254	5.1338571243816e-68	Crsca06aG0175600	PC
4.3835380530015e-72	0.471002221883771	0.411	0.276	2.0457972093358e-67	Crsca17aG0136500	PC
6.07277486483842e-72	0.754927196180118	0.314	0.2	2.83416402942009e-67	Crsca04aG0105800	PC
6.9108363633943e-72	0.7762098496967	0.34	0.223	3.22528733079612e-67	Crsca01aG0027500	PC
7.70999592622619e-71	0.545806434249304	0.416	0.283	3.59825509876976e-66	Crsca10aG0034000	PC
8.17633671430734e-71	0.425246286644207	0.65	0.519	3.81589634456724e-66	Crsca13aG0034300	PC
2.03265609385187e-70	0.646375538627685	0.405	0.279	9.48640599000668e-66	Crsca07aG0093000	PC
3.85246602517704e-70	0.697911135387539	0.387	0.266	1.79794589395013e-65	Crsca17aG0197900	PC
1.67122323107675e-67	0.336334632103136	0.624	0.473	7.79959881943521e-63	Crsca09aG0240300	PC
1.64666169539837e-66	0.727855582558947	0.294	0.185	7.68497013242418e-62	Crsca16aG0102300	PC
2.65787483075505e-66	0.715522289679131	0.357	0.244	1.24043018351338e-61	Crsca08aG0008900	PC
1.63333275376145e-65	0.468716547934426	0.51	0.374	7.62276396180471e-61	Crsca09aG0006000	PC
5.47514851528366e-65	0.989885358530565	0.264	0.165	2.55525181208288e-60	Crsca04aG0326300	PC
7.67829843568499e-65	0.712300224349893	0.283	0.177	3.58346187993418e-60	Crsca08aG0001700	PC
1.48756033703429e-64	0.663591225600782	0.372	0.256	6.94244409293902e-60	Crsca01aG0127900	PC
1.93735021891017e-64	0.449372533072986	0.629	0.494	9.04161347165378e-60	Crsca06aG0124400	PC
8.22463854153285e-64	0.4549998309438	0.562	0.426	3.83843880733338e-59	Crsca17aG0231400	PC
1.51754839011162e-63	0.5345711236373	0.386	0.265	7.08239833665093e-59	Crsca17aG0076400	PC
8.99399108429861e-63	0.535016804282128	0.286	0.175	4.19749563904216e-58	Crsca15aG0110000	PC
9.12582927064763e-63	0.722302332885654	0.252	0.153	4.25902452061125e-58	Crsca02aG0232800	PC
2.52645443010001e-62	0.421030112478292	0.424	0.296	1.17909628252767e-57	Crsca04aG0270600	PC
2.6704077228878e-62	0.625359157046009	0.323	0.212	1.24627928427174e-57	Crsca12aG0211000	PC
5.27498188949513e-62	0.819635547704064	0.252	0.155	2.46183404782738e-57	Crsca01aG0145000	PC
7.11457828071371e-62	0.317467940522757	0.768	0.642	3.32037368360909e-57	Crsca09aG0206400	PC
1.04219175121809e-60	0.554935640707744	0.372	0.255	4.86390890293482e-56	Crsca10aG0166100	PC
1.27066431278485e-60	0.464751045848713	0.521	0.39	5.93019034776692e-56	Crsca01aG0226400	PC
2.42091310337252e-60	0.412097443335603	0.517	0.382	1.12984014534395e-55	Crsca15aG0126700	PC
3.56302833863072e-60	0.576818986865207	0.352	0.24	1.66286532563896e-55	Crsca15aG0229400	PC
6.74446743734159e-59	0.71342913031267	0.344	0.241	3.14764295300732e-54	Crsca09aG0121600	PC
1.4376743991705e-58	0.513592830190917	0.389	0.269	6.7096264209287e-54	Crsca17aG0121900	PC
3.77666746840849e-58	0.546177597971607	0.379	0.264	1.76257070750624e-53	Crsca14aG0199100	PC
1.07264134690205e-57	0.479020317915804	0.279	0.173	5.00601716599185e-53	Crsca13aG0160300	PC
2.20609200816365e-57	0.422601930360249	0.352	0.237	1.02958314020998e-52	Crsca01aG0092200	PC
3.60284540036862e-57	0.559905110997335	0.455	0.338	1.68144794835204e-52	Crsca11aG0263700	PC
9.94737961180299e-57	0.931841722907713	0.259	0.167	4.64244206482845e-52	Crsca07aG0155900	PC
1.39181961987179e-56	0.611883735758642	0.328	0.221	6.49562216594164e-52	Crsca13aG0112100	PC
1.92763005280655e-56	0.494488506498064	0.397	0.278	8.99624945644815e-52	Crsca03aG0300300	PC
3.31862511111882e-56	0.586714403323119	0.295	0.193	1.54880233935916e-51	Crsca05aG0102900	PC
1.15913240466677e-55	0.594012727046847	0.28	0.179	5.4096709325798e-51	Crsca15aG0166300	PC
1.46328102777834e-55	0.711913695987218	0.263	0.169	6.8291325566415e-51	Crsca03aG0332000	PC
1.56092082431462e-55	0.55590366025453	0.381	0.272	7.28481748707635e-51	Crsca02aG0277500	PC
2.65654202107928e-55	0.518854799519171	0.413	0.3	1.2398081612377e-50	Crsca08aG0025900	PC
1.47697222247431e-54	0.693409707264549	0.282	0.185	6.89302936228762e-50	Crsca05aG0158500	PC
1.11226303694925e-53	0.278462856464574	0.269	0.167	5.19093159344213e-49	Crsca15aG0144900	PC
1.68392899858406e-53	0.66886909704122	0.281	0.184	7.85889663639181e-49	Crsca17aG0116000	PC
7.13146835387199e-51	0.553869262846593	0.309	0.209	3.32825628075206e-46	Crsca02aG0210200	PC
2.90057050471746e-50	0.67463791410455	0.277	0.184	1.35369625455164e-45	Crsca11aG0001400	PC
3.40783806419636e-50	0.517381690004848	0.414	0.306	1.59043802456044e-45	Crsca17aG0084000	PC
6.41050031647639e-50	0.587812027608872	0.305	0.206	2.99178049769953e-45	Crsca16aG0221500	PC
4.58419350891122e-49	0.365364480419697	0.427	0.311	2.13944311060886e-44	Crsca17aG0133600	PC
1.88671077462239e-48	1.0921841051677	0.259	0.174	8.80527918516269e-44	Crsca02aG0214600	PC
3.9676923636514e-48	0.454961208947522	0.39	0.281	1.85172202611611e-43	Crsca15aG0015000	PC
1.97695889021055e-47	0.546535342742011	0.345	0.245	9.22646714061263e-43	Crsca02aG0065800	PC
6.9953877043604e-47	0.773864873428082	0.348	0.255	3.264747441625e-42	Crsca12aG0151400	PC
1.18172880805225e-46	0.740626317260757	0.478	0.404	5.51512834717985e-42	Crsca15aG0006700	PC
1.9864288853124e-45	0.587446270062897	0.323	0.228	9.27066360775297e-41	Crsca01aG0029600	PC
2.10936838225764e-45	0.87916045695988	0.344	0.254	9.84442223999643e-41	Crsca03aG0166100	PC
2.47295327159978e-45	0.43843669320238	0.397	0.291	1.15412729185562e-40	Crsca04aG0029100	PC
2.84096911535401e-45	0.464301361047033	0.532	0.417	1.32588028613571e-40	Crsca09aG0239400	PC
3.98494889095704e-45	0.347306813106657	0.472	0.36	1.85977564740965e-40	Crsca15aG0065100	PC
8.4276352798814e-45	0.588167043540391	0.254	0.168	3.93317738512065e-40	Crsca05aG0093300	PC
8.88123871175694e-45	0.562332266246483	0.252	0.166	4.14487410677696e-40	Crsca01aG0135200	PC
1.48998950958339e-44	0.641021440408572	0.345	0.252	6.9537810412257e-40	Crsca02aG0234000	PC
1.79303090917129e-44	0.286868239768308	0.435	0.316	8.36807525310241e-40	Crsca17aG0201000	PC
2.57697697634008e-44	0.413592547049412	0.291	0.195	1.20267515485791e-39	Crsca13aG0121500	PC
1.22628962884428e-43	0.395943813200078	0.257	0.167	5.72309369781626e-39	Crsca08aG0026100	PC
1.26728666836866e-43	0.390895621778344	0.474	0.363	5.91442688127654e-39	Crsca06aG0198300	PC
1.60984816211538e-43	0.45136755291965	0.33	0.232	7.51316137259247e-39	Crsca04aG0062100	PC
2.6320293739951e-43	0.589766348112533	0.308	0.217	1.22836810884351e-38	Crsca11aG0062300	PC
5.1960591565877e-43	0.495225500242019	0.303	0.209	2.42500080837948e-38	Crsca14aG0219100	PC
8.12866197537972e-43	0.45939555649842	0.332	0.237	3.79364654390972e-38	Crsca16aG0210600	PC
3.81199931716886e-41	0.390577643464109	0.511	0.406	1.77906008132271e-36	Crsca03aG0148500	PC
4.76714188637266e-41	0.620756979421761	0.266	0.184	2.22482511837012e-36	Crsca04aG0152000	PC
7.20888263792489e-41	0.515737200425177	0.273	0.187	3.36438552711955e-36	Crsca12aG0147400	PC
8.37333928563416e-41	0.52818678425027	0.627	0.529	3.90783744460546e-36	Crsca03aG0319100	PC
1.01841666311825e-40	0.503945274732243	0.31	0.223	4.75295056677285e-36	Crsca09aG0066300	PC
1.09461290684197e-40	0.574933517246031	0.283	0.196	5.10855843623146e-36	Crsca12aG0115000	PC
1.10362933778353e-40	0.482757035929004	0.389	0.295	5.15063811943574e-36	Crsca06aG0135500	PC
1.65022564745679e-40	0.535572398153728	0.284	0.198	7.70160309668086e-36	Crsca01aG0036900	PC
1.83169024700097e-40	0.416190469805144	0.299	0.207	8.54849838275353e-36	Crsca04aG0211400	PC
2.11360713888757e-40	0.347875424353917	0.522	0.414	9.8642045171883e-36	Crsca16aG0154100	PC
2.5952938127629e-40	0.687007055558379	0.251	0.172	1.21122362241644e-35	Crsca13aG0250000	PC
3.6416016623364e-40	0.506368944587945	0.358	0.266	1.6995354958124e-35	Crsca11aG0133300	PC
3.82573536573821e-40	0.510841748089843	0.388	0.293	1.78547069519002e-35	Crsca12aG0130500	PC
8.29877569285664e-40	0.407933888389082	0.352	0.255	3.8730386158562e-35	Crsca02aG0001400	PC
8.58605820942097e-40	0.495808313747322	0.36	0.263	4.00711336633677e-35	Crsca07aG0195100	PC
1.58709069220519e-39	0.57151026275622	0.264	0.182	7.40695226052163e-35	Crsca15aG0130600	PC
3.21724541993767e-39	0.287493777501492	0.282	0.191	1.50148843748491e-34	Crsca01aG0197000	PC
4.89803849228986e-39	0.507926590800978	0.335	0.245	2.28591456435168e-34	Crsca04aG0237500	PC
5.43920411527488e-39	0.48433426363311	0.334	0.244	2.53847656059879e-34	Crsca08aG0229800	PC
7.1047708556645e-39	0.314598053121447	0.395	0.29	3.31579655833862e-34	Crsca05aG0150200	PC
7.19731057969557e-39	0.558492069069941	0.31	0.223	3.35898484754392e-34	Crsca09aG0138500	PC
9.16506761479925e-39	0.79868045942412	0.327	0.243	4.27733705582681e-34	Crsca17aG0242000	PC
9.75330096466429e-39	0.383450379763632	0.312	0.219	4.55186556020882e-34	Crsca03aG0053700	PC
1.02643688740987e-38	0.5953827300724	0.258	0.178	4.79038095354186e-34	Crsca12aG0013100	PC
2.4054053007311e-38	0.42774533232943	0.26	0.177	1.12260265385121e-33	Crsca12aG0288700	PC
9.53436128656729e-37	0.341129454852452	0.51	0.403	4.44968641244096e-32	Crsca16aG0175200	PC
1.45278257325892e-36	0.414687914911213	0.314	0.226	6.78013626939937e-32	Crsca15aG0018500	PC
1.59460689771827e-36	0.481573113150433	0.314	0.23	7.44203039165115e-32	Crsca01aG0090600	PC
2.52008493283963e-36	0.48651505415552	0.297	0.211	1.17612363815626e-31	Crsca14aG0027000	PC
9.26337935225429e-36	0.501918548192976	0.29	0.209	4.32321914369708e-31	Crsca10aG0231200	PC
1.14654886363994e-35	0.434025075458618	0.331	0.244	5.35094354660758e-31	Crsca16aG0174500	PC
1.5591448193293e-35	0.377049853877577	0.342	0.252	7.27652887180986e-31	Crsca01aG0290900	PC
2.04719567602046e-35	0.30243560600624	0.324	0.231	9.5542622199875e-31	Crsca03aG0333700	PC
3.38619623832842e-35	0.428292789027042	0.285	0.201	1.58033778442787e-30	Crsca15aG0206400	PC
1.15479194148326e-34	0.938834943552942	0.301	0.23	5.38941399090235e-30	Crsca07aG0248300	PC
8.52451044763623e-34	0.420153936466252	0.364	0.277	3.97838902591183e-29	Crsca17aG0134900	PC
1.37136976128531e-33	0.352221285268127	0.401	0.31	6.40018267591855e-29	Crsca08aG0229400	PC
1.29620063680183e-32	0.357633652414545	0.369	0.279	6.04936837195414e-28	Crsca06aG0199900	PC
8.73188623714118e-32	0.688765307251993	0.292	0.222	4.07517130687379e-27	Crsca03aG0245500	PC
1.12946974470339e-31	0.447163055712756	0.279	0.203	5.2712352985307e-27	Crsca16aG0090200	PC
1.31885308590706e-31	0.364033480257361	0.411	0.317	6.15508735192826e-27	Crsca11aG0083600	PC
2.47748573147341e-31	0.448442866963621	0.424	0.345	1.15624259087864e-26	Crsca12aG0092600	PC
3.34229970772081e-31	0.444822298344769	0.337	0.258	1.5598512735933e-26	Crsca09aG0113200	PC
3.8357441305605e-31	0.295585138201672	0.579	0.478	1.79014178573258e-26	Crsca12aG0075800	PC
5.82473423547164e-31	0.276615747193152	0.555	0.453	2.71840346769462e-26	Crsca01aG0235200	PC
1.04302996417279e-30	0.442485047386891	0.328	0.248	4.86782084279439e-26	Crsca09aG0275100	PC
1.18383489897483e-30	0.370659392938662	0.397	0.311	5.52495747351555e-26	Crsca08aG0015300	PC
1.35958520538674e-30	0.353878760106088	0.381	0.297	6.3451841535399e-26	Crsca17aG0174000	PC
1.82978559672176e-30	0.706837749322857	0.393	0.326	8.53960937990046e-26	Crsca12aG0278600	PC
2.72822602672486e-30	0.405203761338355	0.434	0.346	1.27326308667249e-25	Crsca17aG0005400	PC
1.26064050295633e-29	0.588181241850506	0.256	0.188	5.88340922729718e-25	Crsca02aG0331600	PC
1.26099205338482e-29	0.465291201547305	0.276	0.203	5.88504991314697e-25	Crsca06aG0121900	PC
2.82762529751232e-29	0.476559866684427	0.264	0.192	1.319652726349e-24	Crsca14aG0119500	PC
2.85194023841942e-29	0.318898616780157	0.329	0.246	1.33100050927034e-24	Crsca10aG0208400	PC
3.60933044753025e-29	0.450605991821547	0.279	0.206	1.68447451986237e-24	Crsca05aG0079600	PC
1.61942754722546e-28	0.2781518060073	0.307	0.226	7.55786836290124e-24	Crsca04aG0334200	PC
2.00557046341974e-28	0.291186257760335	0.304	0.223	9.35999735277993e-24	Crsca02aG0073800	PC
2.9155277645299e-28	0.264868753179931	0.362	0.276	1.36067680770611e-23	Crsca14aG0226600	PC
5.37980229691698e-28	0.417872144174993	0.385	0.306	2.51075373197116e-23	Crsca06aG0060300	PC
7.04484051747516e-28	0.361188986674084	0.292	0.217	3.28782706950566e-23	Crsca14aG0009300	PC
9.05354636563497e-27	0.351314788183893	0.337	0.258	4.22529008884184e-22	Crsca08aG0208100	PC
1.0423759123392e-26	0.260821557683673	0.404	0.317	4.86476838288703e-22	Crsca17aG0117600	PC
1.54055635225007e-26	0.387275066041762	0.29	0.217	7.18977649595106e-22	Crsca04aG0198200	PC
1.58098185961416e-26	0.328144119467148	0.283	0.21	7.37844233881928e-22	Crsca10aG0149900	PC
4.05825107324419e-26	0.266341642530059	0.613	0.528	1.89398577588307e-21	Crsca11aG0029900	PC
5.26176437432427e-26	0.399519027496474	0.305	0.23	2.45566543349714e-21	Crsca04aG0226000	PC
6.64230009959398e-26	0.30629799997013	0.464	0.378	3.09996145648051e-21	Crsca13aG0186600	PC
1.42427222273254e-25	0.453385264471901	0.327	0.255	6.64707846349275e-21	Crsca04aG0009500	PC
2.00266765570838e-25	0.305304157028376	0.475	0.39	9.34644994919101e-21	Crsca15aG0096300	PC
5.55407088730395e-25	0.321388347731342	0.292	0.219	2.59208488310475e-20	Crsca14aG0112400	PC
1.83894309160344e-24	0.367802272411034	0.312	0.24	8.58234740851327e-20	Crsca02aG0250600	PC
1.85152997983915e-24	0.346924980103862	0.256	0.189	8.64109041590931e-20	Crsca12aG0043900	PC
7.18016238182017e-24	0.279620208095713	0.35	0.272	3.35098178359548e-19	Crsca08aG0057800	PC
7.4306298604039e-24	0.377467607521724	0.262	0.195	3.4678749558505e-19	Crsca04aG0228300	PC
1.06769532156602e-23	0.399058561962785	0.277	0.212	4.9829340657486e-19	Crsca05aG0181400	PC
1.13491414438499e-23	0.472044339076623	0.25	0.186	5.29664431184473e-19	Crsca10aG0065000	PC
3.33635188790959e-23	0.332289704906261	0.306	0.235	1.5570754260874e-18	Crsca12aG0095900	PC
1.14528594682432e-22	0.535779366329594	0.661	0.602	5.34504951382908e-18	Crsca06aG0205500	PC
1.29364045879704e-22	0.359190309909226	0.276	0.21	6.03742002120581e-18	Crsca17aG0052700	PC
3.33459068884085e-22	0.268273650416611	0.329	0.258	1.55625347448203e-17	Crsca12aG0151800	PC
1.0210388952557e-21	0.485881442156801	0.331	0.271	4.76518852415834e-17	Crsca03aG0272800	PC
1.47985524051886e-20	0.342229282535391	0.337	0.27	6.9064844075015e-16	Crsca12aG0192700	PC
1.94518578766891e-20	0.362974571486409	0.252	0.192	9.0781820710508e-16	Crsca11aG0193500	PC
2.13654108149175e-20	0.318526371281704	0.308	0.241	9.97123722732201e-16	Crsca05aG0133600	PC
2.74747808459789e-20	0.73904959442086	0.292	0.234	1.28224802208183e-15	Crsca17aG0242100	PC
5.71335075535967e-20	0.264636234447443	0.276	0.213	2.66642079752636e-15	Crsca12aG0054500	PC
7.04754134215431e-20	0.479881986160141	0.419	0.357	3.28908754438342e-15	Crsca10aG0127400	PC
8.22888246297193e-20	0.358152877225219	0.31	0.246	3.840419445469e-15	Crsca11aG0260000	PC
3.04339696873974e-17	0.266948681435544	0.326	0.264	1.42035336531084e-12	Crsca02aG0191500	PC
1.58282906435882e-16	0.293109716080196	0.276	0.217	7.38706324336262e-12	Crsca15aG0159400	PC
2.77979870419536e-16	0.255305653002047	0.32	0.259	1.29733205524798e-11	Crsca04aG0049000	PC
1.02662655414688e-15	0.301560785256691	0.295	0.238	4.7912661282035e-11	Crsca15aG0194000	PC
2.82130178095811e-15	0.301156689378886	0.36	0.297	1.31670154117315e-10	Crsca10aG0237700	PC
1.42490554820795e-14	0.312584693868091	0.27	0.218	6.65003419348652e-10	Crsca14aG0106200	PC
2.10030056148241e-14	0.289404926273773	0.252	0.2	9.80210272043839e-10	Crsca01aG0233900	PC
8.14445716162366e-14	0.275117997134551	0.275	0.222	3.80101815732976e-09	Crsca15aG0182600	PC
1.09568620421878e-12	0.524070510482666	0.319	0.281	5.11356751508905e-08	Crsca02aG0324400	PC
1.15415393697877e-12	0.696560216123385	0.438	0.397	5.38643642387993e-08	Crsca12aG0288800	PC
1.22338131487022e-12	0.330596750523314	0.255	0.209	5.70952059649931e-08	Crsca10aG0239400	PC
1.8082037294731e-12	0.29056963383193	0.274	0.226	8.43888680545093e-08	Crsca12aG0287600	PC
6.8679085967273e-12	0.274028436906017	0.269	0.221	3.20525294209263e-07	Crsca03aG0042900	PC
0.00495030561141325	0.304995598109117	0.354	0.336	1	Crsca02aG0003100	PC
0	4.92339634771242	0.555	0.037	0	Crsca10aG0042800	GC
0	5.31924856055799	0.52	0.021	0	Crsca04aG0316400	GC
0	4.51450690866292	0.492	0.033	0	Crsca05aG0120000	GC
0	5.44446831495391	0.441	0.018	0	Crsca01aG0089100	GC
0	5.49190300407077	0.409	0.015	0	Crsca04aG0005700	GC
0	6.55111709897074	0.402	0.009	0	Crsca01aG0005400	GC
0	5.44470677493228	0.402	0.02	0	Crsca09aG0055800	GC
0	6.00384539021771	0.37	0.007	0	Crsca03aG0070200	GC
0	5.33641374046986	0.346	0.014	0	Crsca09aG0228400	GC
0	5.65284642935465	0.331	0.01	0	Crsca07aG0242100	GC
0	5.05973334882141	0.327	0.011	0	Crsca02aG0329500	GC
0	5.76065915314746	0.291	0.007	0	Crsca15aG0113400	GC
0	5.12454773231628	0.287	0.011	0	Crsca04aG0227800	GC
0	6.04720438432634	0.276	0.006	0	Crsca08aG0054300	GC
0	6.75609493429263	0.272	0.004	0	Crsca07aG0218600	GC
0	5.31533146325648	0.268	0.007	0	Crsca10aG0050100	GC
2.38738862686796e-262	4.5990073801679	0.295	0.015	1.11419427215928e-257	Crsca03aG0276000	GC
1.1042775634783e-179	3.89589043237802	0.406	0.041	5.15366338875321e-175	Crsca13aG0211600	GC
2.89804077419785e-162	4.21092373200505	0.272	0.02	1.35251562931814e-157	Crsca04aG0169300	GC
1.61014457826012e-143	3.68769885310813	0.693	0.164	7.51454474673999e-139	Crsca08aG0052200	GC
6.12489228384696e-138	3.20372253418231	0.622	0.125	2.85848722887137e-133	Crsca02aG0216900	GC
3.31168529708404e-132	3.02172497014268	0.512	0.085	1.54556352814912e-127	Crsca03aG0153100	GC
1.05063979700135e-124	3.48128427803292	0.406	0.057	4.90333593260531e-120	Crsca02aG0201500	GC
3.45648684439102e-108	3.22564543064818	0.35	0.048	1.61314241027729e-103	Crsca01aG0174200	GC
7.22344604955889e-104	3.50236666413162	0.26	0.028	3.37118227132913e-99	Crsca08aG0153500	GC
2.57344315966985e-103	3.19511349407299	0.311	0.04	1.20102592261792e-98	Crsca01aG0000700	GC
1.50291188317479e-101	3.5107250180395	0.331	0.047	7.01408975877676e-97	Crsca01aG0010800	GC
4.32107553904469e-95	2.93545385900588	0.484	0.102	2.01664595407216e-90	Crsca12aG0021700	GC
3.90793888200695e-92	3.0114196047301	0.378	0.065	1.82383507623264e-87	Crsca02aG0029600	GC
1.38381306696102e-88	3.30726030826355	0.291	0.041	6.45825558350707e-84	Crsca17aG0222900	GC
1.42543188308091e-88	3.23825367615928	0.52	0.13	6.65249059833861e-84	Crsca16aG0216900	GC
4.13400735595374e-88	3.1511437523667	0.276	0.037	1.92934123302361e-83	Crsca15aG0230300	GC
4.49213901335108e-86	3.25859961590036	0.28	0.039	2.09648127753095e-81	Crsca11aG0078900	GC
1.39498928841116e-84	3.0481645349518	0.272	0.036	6.51041500901487e-80	Crsca03aG0285500	GC
1.21392347565026e-77	2.75369140775296	0.386	0.077	5.66538086085976e-73	Crsca14aG0218600	GC
7.76989784877978e-74	3.35005802649842	0.272	0.042	3.62621132602552e-69	Crsca12aG0215300	GC
4.33464496724275e-72	2.86380212965808	0.358	0.071	2.02297880621219e-67	Crsca15aG0160700	GC
5.57298829535744e-69	2.15066833007753	0.673	0.249	2.60091363744332e-64	Crsca04aG0240000	GC
7.6156786083162e-60	2.32479709446967	0.409	0.103	3.55423720650117e-55	Crsca14aG0195900	GC
1.52100269604452e-56	2.69402348325095	0.283	0.055	7.09851958243979e-52	Crsca08aG0226800	GC
2.2859780634423e-50	2.22198524257119	0.453	0.14	1.06686596220852e-45	Crsca13aG0253700	GC
4.86478985966016e-48	3.40297507994181	0.465	0.164	2.2703974275034e-43	Crsca07aG0085000	GC
2.66934804285993e-47	2.44274292296354	0.26	0.054	1.24578473160273e-42	Crsca11aG0148100	GC
5.07962965114482e-47	2.28012080489896	0.504	0.184	2.37066315818929e-42	Crsca02aG0214600	GC
1.87019721534147e-46	2.35024590682585	0.272	0.058	8.72821040399862e-42	Crsca07aG0148000	GC
4.18929571061475e-45	2.09783148151499	0.583	0.254	1.9551443081439e-40	Crsca03aG0114200	GC
1.26021743606889e-44	2.16607669982433	0.358	0.1	5.88143477413351e-40	Crsca13aG0002900	GC
2.18109600334971e-42	2.26199915921434	0.382	0.116	1.01791750476331e-37	Crsca09aG0202300	GC
5.34174804983977e-41	1.81449036035786	0.591	0.269	2.49299381486022e-36	Crsca16aG0183400	GC
9.59574733373924e-41	2.55966788270321	0.287	0.073	4.4783352806561e-36	Crsca04aG0293800	GC
9.74457462940927e-41	2.70430009293576	0.35	0.106	4.54779297954531e-36	Crsca07aG0092000	GC
1.77544700351547e-40	2.74090652091295	0.358	0.11	8.28601116540669e-36	Crsca09aG0162700	GC
4.7428445767824e-40	2.41776546151367	0.268	0.064	2.21348556398434e-35	Crsca09aG0170600	GC
2.4993343666904e-38	1.82803546529713	0.654	0.336	1.16643934893441e-33	Crsca07aG0085300	GC
9.13400432022691e-37	1.95855250394048	0.531	0.24	4.2628398162499e-32	Crsca17aG0242100	GC
1.11965777219802e-36	1.76763351170332	0.598	0.294	5.22544282284817e-32	Crsca15aG0015000	GC
1.15801141166807e-36	1.86571764533218	0.398	0.133	5.4044392582549e-32	Crsca06aG0195900	GC
2.14298574596301e-35	2.06940767053917	0.276	0.073	1.00013144764094e-30	Crsca12aG0160300	GC
6.36091911233725e-35	2.23059515440201	0.256	0.065	2.96864094972779e-30	Crsca12aG0076300	GC
1.8996406069249e-32	1.62697553498398	0.362	0.12	8.86562271251852e-28	Crsca10aG0209800	GC
1.84453820454252e-31	1.92923646232756	0.28	0.079	8.60845980059994e-27	Crsca14aG0046400	GC
4.23835207171022e-31	2.09040280263306	0.319	0.103	1.97803891186716e-26	Crsca14aG0135000	GC
8.60924823854677e-30	1.47274752306164	0.591	0.287	4.01793615292978e-25	Crsca12aG0084600	GC
1.32733842467279e-28	2.11278069678402	0.295	0.096	6.19468842794793e-24	Crsca16aG0202400	GC
2.61975205469521e-28	2.0980194016727	0.469	0.222	1.22263828392625e-23	Crsca01aG0225100	GC
3.26544847740277e-28	1.72458998125084	0.252	0.071	1.52398480440387e-23	Crsca07aG0200300	GC
2.09689485848295e-27	1.80647903269615	0.374	0.147	9.78620830453991e-23	Crsca13aG0010600	GC
6.55643095984496e-27	1.4583	0.445	0.191	3.05988632895964e-22	Crsca01aG0013600	GC
6.77401257737885e-27	1.47302529701808	0.358	0.132	3.16143166986271e-22	Crsca01aG0102700	GC
9.81752060298226e-26	2.11941548815343	0.256	0.08	4.58183686541182e-21	Crsca02aG0144900	GC
3.23055623356926e-25	1.98137614371215	0.264	0.085	1.50770059420677e-20	Crsca13aG0185000	GC
3.73445991346821e-25	0.863988783501307	0.823	0.525	1.74287244161562e-20	Crsca11aG0259500	GC
4.54097893026042e-25	1.60364853370498	0.543	0.293	2.11927486675254e-20	Crsca01aG0225300	GC
2.502866634966e-24	1.24905832531318	0.492	0.235	1.16808785853863e-19	Crsca12aG0156400	GC
1.63738633352541e-23	1.18864680581265	0.76	0.563	7.6416820185631e-19	Crsca07aG0174600	GC
3.65264546863759e-23	1.43787505063187	0.35	0.139	1.70468964021316e-18	Crsca11aG0257800	GC
1.07636850172202e-20	1.72116587157329	0.268	0.098	5.02341179753667e-16	Crsca17aG0140600	GC
1.54864167608452e-20	1.46973255242982	0.575	0.341	7.22751070228647e-16	Crsca12aG0163100	GC
9.47584712787318e-20	1.61726399087733	0.295	0.115	4.42237785457841e-15	Crsca03aG0253600	GC
1.63211767423986e-19	1.35292134014544	0.37	0.166	7.61709318567742e-15	Crsca02aG0142400	GC
4.71606034016629e-19	1.3638840792517	0.827	0.693	2.20098536075561e-14	Crsca17aG0138700	GC
6.64499757690066e-19	0.93015364923614	0.453	0.228	3.10122036913954e-14	Crsca04aG0324900	GC
1.03275139298342e-18	1.14324865731653	0.594	0.357	4.81985075105362e-14	Crsca11aG0130300	GC
1.41937552465038e-18	0.760168852597235	0.492	0.242	6.62422557354331e-14	Crsca06aG0186700	GC
2.88688503600919e-18	1.22104312303752	0.374	0.171	1.34730924630549e-13	Crsca08aG0101100	GC
2.94857794190881e-18	1.34472243277764	0.354	0.157	1.37610132548884e-13	Crsca01aG0103400	GC
4.30339465293411e-16	1.86268666053507	0.689	0.564	2.00839428452435e-11	Crsca06aG0229000	GC
5.03636297247104e-16	1.24004569970988	0.331	0.149	2.35047059925223e-11	Crsca04aG0163500	GC
5.08801833102985e-16	1.08760045948456	0.429	0.222	2.37457815509163e-11	Crsca02aG0115100	GC
5.95466246753766e-16	1.35221720732502	0.35	0.173	2.77904097359982e-11	Crsca03aG0108300	GC
6.7006106201383e-16	1.63036777962837	0.441	0.268	3.12717497641855e-11	Crsca09aG0113200	GC
1.97459436936874e-15	1.16607559801214	0.331	0.154	9.21543192184392e-11	Crsca04aG0296700	GC
2.57346458589347e-15	1.26090481335916	0.358	0.173	1.20103592223648e-10	Crsca04aG0015000	GC
2.67971397550689e-15	0.928114655598852	0.661	0.476	1.25062251236906e-10	Crsca15aG0004600	GC
2.76757480901818e-15	1.17790048248161	0.276	0.114	1.29162716336878e-10	Crsca17aG0135400	GC
2.78366122140195e-15	1.28898084341851	0.535	0.334	1.29913469202829e-10	Crsca05aG0195100	GC
2.99872374745122e-15	1.36937202168797	0.283	0.123	1.39950437293548e-10	Crsca03aG0140300	GC
4.15225024965816e-15	1.50181779129797	0.283	0.125	1.93785519151546e-10	Crsca08aG0091000	GC
6.9726331454671e-15	1.28025160857057	0.323	0.152	3.25412788898949e-10	Crsca16aG0070700	GC
2.02227025518587e-14	1.55309186803696	0.283	0.13	9.43793528095245e-10	Crsca07aG0100600	GC
5.69339223102563e-14	1.06276006064887	0.476	0.286	2.65710615421966e-09	Crsca15aG0012900	GC
7.18367341161804e-14	1.12337115611803	0.311	0.145	3.35262038120214e-09	Crsca07aG0013600	GC
8.62086456147287e-14	0.943158848639186	0.362	0.181	4.02335749083939e-09	Crsca05aG0191900	GC
8.98244146646653e-14	1.07001925082907	0.323	0.153	4.19210543239993e-09	Crsca05aG0156000	GC
2.06507142372335e-13	1.14385123899648	0.335	0.167	9.63768833451689e-09	Crsca05aG0131800	GC
3.78953498828843e-13	0.838860649667766	0.642	0.482	1.76857597903421e-08	Crsca06aG0184600	GC
3.89758219508107e-13	0.590912242607407	0.717	0.528	1.81900161044434e-08	Crsca14aG0212300	GC
5.96665143262947e-13	1.2816152100285	0.256	0.115	2.78463622360817e-08	Crsca15aG0052500	GC
6.07044912733751e-13	0.841679885312007	0.398	0.213	2.83307860772842e-08	Crsca09aG0136300	GC
3.72199642065529e-12	1.19903169029358	0.657	0.515	1.73705572951982e-07	Crsca14aG0012400	GC
4.19769953347294e-12	1.22961895726498	0.26	0.121	1.95906637227182e-07	Crsca10aG0246400	GC
5.14672703643085e-12	1.25783406460109	0.354	0.199	2.40197750790228e-07	Crsca16aG0102300	GC
6.45921956649021e-12	1.69143386314852	0.358	0.206	3.01451777168098e-07	Crsca01aG0113400	GC
2.13373071550657e-11	1.18465116676512	0.335	0.186	9.95812124926915e-07	Crsca17aG0015900	GC
7.42081388738636e-11	0.948564500892296	0.374	0.212	3.46329384124321e-06	Crsca04aG0015900	GC
1.86279886985475e-10	1.05313625975292	0.441	0.288	8.69368232561213e-06	Crsca03aG0160900	GC
2.2263047063347e-10	1.20389156864225	0.303	0.161	1.0390164064464e-05	Crsca09aG0147000	GC
3.60451796775116e-10	1.06595719867066	0.354	0.206	1.68222853554946e-05	Crsca17aG0187800	GC
7.80073957724634e-10	0.695068282968242	0.594	0.433	3.64060516070087e-05	Crsca09aG0239400	GC
1.27194163424129e-09	1.17540657291523	0.256	0.132	5.93615160700409e-05	Crsca09aG0229900	GC
1.97283862163057e-09	0.816569348881791	0.374	0.219	9.20723784714986e-05	Crsca10aG0231200	GC
2.08037461663465e-09	1.25634433621401	0.366	0.224	9.70910833583393e-05	Crsca15aG0159400	GC
2.40946385174683e-09	0.936492448728692	0.378	0.228	0.000112449677961025	Crsca16aG0054200	GC
2.70086995640686e-09	1.11883997851443	0.283	0.154	0.000126049600865508	Crsca14aG0011600	GC
6.13275202137484e-09	0.724557126917096	0.331	0.184	0.000286215536837564	Crsca16aG0180600	GC
7.08724853004953e-09	0.515841712782014	0.598	0.42	0.000330761888897411	Crsca03aG0148500	GC
1.80895023822896e-08	0.67781235508264	0.35	0.201	0.000844237076181456	Crsca09aG0246500	GC
1.92890437775166e-08	0.556014475431697	0.752	0.61	0.000900219673096701	Crsca06aG0205500	GC
1.99662985208664e-08	0.590602154572085	0.39	0.236	0.000931827151968836	Crsca03aG0304500	GC
4.21413906793822e-08	0.434241192593556	0.661	0.494	0.00196673870300677	Crsca04aG0002300	GC
8.10796284696065e-08	0.615449432355766	0.563	0.401	0.00378398626067653	Crsca15aG0096300	GC
8.51754604264631e-08	0.948891792579282	0.398	0.264	0.00397513873810303	Crsca02aG0234000	GC
8.78727026760417e-08	0.959697835122594	0.276	0.159	0.00410101903389086	Crsca08aG0016800	GC
1.05064628478024e-07	0.623142093224123	0.327	0.19	0.00490336621106936	Crsca15aG0110000	GC
1.06153046423589e-07	1.27854096998228	0.26	0.15	0.0049541626765889	Crsca09aG0247700	GC
1.11287254915076e-07	0.815080117002854	0.362	0.229	0.00519377618688661	Crsca11aG0062300	GC
1.19535295802617e-07	0.640646064090137	0.681	0.534	0.00557871225510815	Crsca09aG0027800	GC
1.68646533393465e-07	1.15426618878179	0.394	0.267	0.00787073371347301	Crsca12aG0151400	GC
1.69039357082113e-07	0.839671002067675	0.354	0.232	0.00788906679502222	Crsca16aG0136100	GC
1.87560443393667e-07	1.04810530573366	0.26	0.15	0.00875344589318242	Crsca12aG0038600	GC
2.20185305610224e-07	0.967399281051707	0.276	0.163	0.0102760482128292	Crsca17aG0205600	GC
3.44801682640543e-07	0.731677194842567	0.453	0.317	0.0160918945288341	Crsca13aG0146000	GC
4.92951910946385e-07	0.587380128915724	0.449	0.305	0.0230060656838678	Crsca04aG0029100	GC
5.31305579082101e-07	1.09389489759187	0.256	0.151	0.0247960313757616	Crsca06aG0245200	GC
6.67561552829414e-07	0.617591912983742	0.378	0.247	0.0311550976705488	Crsca14aG0073300	GC
8.54823966703271e-07	0.912527286694902	0.331	0.213	0.0398946345260416	Crsca16aG0090200	GC
9.94694991866845e-07	0.811799666346094	0.252	0.143	0.0464224152704257	Crsca14aG0035100	GC
1.03588160957258e-06	0.627005528223175	0.421	0.287	0.0483445947187524	Crsca14aG0226600	GC
1.0926536717698e-06	0.762998175034338	0.26	0.151	0.0509941468614968	Crsca04aG0029900	GC
1.24472907619931e-06	0.74103377364027	0.307	0.191	0.0580915059862219	Crsca08aG0001700	GC
1.58581166358422e-06	0.783460947246946	0.272	0.161	0.0740098303394757	Crsca11aG0065700	GC
1.66671111110461e-06	0.612692008534685	0.394	0.259	0.0777854075552523	Crsca03aG0151500	GC
1.71390339166746e-06	0.792913279093956	0.283	0.171	0.0799878712891204	Crsca11aG0120700	GC
1.74040647395596e-06	0.833109025858513	0.559	0.44	0.0812247701395248	Crsca16aG0075100	GC
3.73937225314744e-06	0.563756438021453	0.598	0.501	0.174516503054391	Crsca04aG0333700	GC
4.57043573902633e-06	0.493569511477893	0.673	0.539	0.213302235940359	Crsca11aG0029900	GC
6.02587401372429e-06	0.780502442193405	0.303	0.196	0.281227540220512	Crsca01aG0005300	GC
6.297376893688e-06	1.04736684417239	0.264	0.166	0.293898579628419	Crsca17aG0242400	GC
8.43293812586569e-06	0.636847009698808	0.669	0.585	0.393565222334152	Crsca02aG0214400	GC
9.17415203832987e-06	0.864580297600041	0.26	0.162	0.428157675628855	Crsca16aG0109800	GC
9.51153387035901e-06	0.627782840788588	0.252	0.151	0.443903285729655	Crsca16aG0204400	GC
1.25096325801923e-05	0.831205097304951	0.315	0.209	0.583824552517574	Crsca02aG0013100	GC
1.28350337400674e-05	0.659344555405348	0.327	0.213	0.599011024648946	Crsca06aG0121900	GC
1.46968120869688e-05	0.611697606673105	0.287	0.183	0.685900220098836	Crsca04aG0279900	GC
1.88716751958916e-05	0.564573408695461	0.378	0.254	0.880741081392262	Crsca06aG0274700	GC
2.36124560134377e-05	0.296169923656005	0.528	0.4	1	Crsca14aG0140200	GC
2.39001733008416e-05	0.416860625453746	0.382	0.259	1	Crsca02aG0311300	GC
2.90328753212891e-05	0.425986300222652	0.39	0.266	1	Crsca16aG0192200	GC
3.41793589511374e-05	0.336017097580658	0.319	0.205	1	Crsca05aG0098500	GC
3.7255544183731e-05	0.796327315507545	0.48	0.382	1	Crsca09aG0133400	GC
3.86057258618794e-05	0.723847113028058	0.264	0.168	1	Crsca01aG0145000	GC
4.71291379861713e-05	0.395284071579939	0.685	0.579	1	Crsca10aG0044700	GC
4.97038914389598e-05	0.569351885318003	0.323	0.22	1	Crsca10aG0149900	GC
6.13387460564167e-05	1.07631130672928	0.256	0.17	1	Crsca02aG0294500	GC
7.35695930322145e-05	0.296273737887401	0.437	0.315	1	Crsca12aG0115800	GC
7.79609267108747e-05	0.864462306433422	0.252	0.166	1	Crsca09aG0148300	GC
0.000116929156120659	0.505036078885024	0.307	0.209	1	Crsca12aG0029600	GC
0.000119921260097311	0.71146531334865	0.469	0.363	1	Crsca07aG0146000	GC
0.000128421277802308	0.713607294507668	0.283	0.196	1	Crsca16aG0148400	GC
0.000173544987684641	0.62937032636346	0.327	0.229	1	Crsca14aG0112400	GC
0.00017444604392497	0.750648154026414	0.299	0.213	1	Crsca15aG0206400	GC
0.000183913737401268	0.425817600447845	0.323	0.224	1	Crsca05aG0027700	GC
0.000194464811763701	0.293117110867824	0.484	0.379	1	Crsca04aG0015500	GC
0.000207287959690661	0.432456706436927	0.299	0.204	1	Crsca04aG0228300	GC
0.000239699004135013	0.526870778825312	0.354	0.259	1	Crsca02aG0065800	GC
0.000253846943819285	0.543490776519437	0.323	0.227	1	Crsca12aG0211000	GC
0.000499889558597016	0.531394872229312	0.709	0.632	1	Crsca16aG0143600	GC
0.000803041809708457	0.361837177086762	0.327	0.232	1	Crsca07aG0189000	GC
0.000842001457851404	0.48190050618308	0.264	0.182	1	Crsca11aG0084300	GC
0.000861619582396388	0.457924570571033	0.295	0.209	1	Crsca01aG0036900	GC
0.000930747500303839	0.517498795743296	0.28	0.197	1	Crsca17aG0096700	GC
0.000936330213598611	0.293155197016451	0.406	0.301	1	Crsca10aG0034000	GC
0.00106539743304156	0.262945915892097	0.406	0.307	1	Crsca04aG0202200	GC
0.00122784829877392	0.392266022402311	0.429	0.33	1	Crsca11aG0083600	GC
0.00130781336315808	0.31784850668724	0.457	0.354	1	Crsca11aG0263700	GC
0.00134832538249002	0.340509256899598	0.28	0.196	1	Crsca11aG0183300	GC
0.00157083767955517	0.583188124347217	0.256	0.181	1	Crsca14aG0098500	GC
0.00168531042671029	0.44097993631992	0.488	0.408	1	Crsca01aG0226400	GC
0.00175217788460585	0.662298055642248	0.39	0.317	1	Crsca06aG0060300	GC
0.00205233563187812	0.331711685345251	0.488	0.403	1	Crsca08aG0072900	GC
0.00211348359634081	0.446547297624264	0.256	0.18	1	Crsca09aG0059900	GC
0.00223262574927971	0.503917527004992	0.252	0.179	1	Crsca17aG0197700	GC
0.00226220434632707	0.324260589423705	0.354	0.268	1	Crsca05aG0190400	GC
0.0026236649711792	0.607021043762469	0.291	0.221	1	Crsca05aG0181400	GC
0.00278800150885996	0.375347414828917	0.378	0.289	1	Crsca17aG0134900	GC
0.00294543312438349	0.484805473251155	0.327	0.249	1	Crsca17aG0099700	GC
0.00390685960675733	0.357102168774518	0.453	0.378	1	Crsca06aG0198300	GC
0.00392530049060054	0.36128907517162	0.354	0.266	1	Crsca06aG0197000	GC
0.00412568450003301	0.434421818236226	0.291	0.216	1	Crsca17aG0017900	GC
0.00433124474013242	0.414900725405372	0.319	0.245	1	Crsca05aG0185600	GC
0.00438156392773067	0.417229218825612	0.307	0.235	1	Crsca09aG0138500	GC
0.00438755570317299	0.383430200088865	0.398	0.322	1	Crsca08aG0015300	GC
0.0046136928122238	0.440368244707026	0.677	0.64	1	Crsca07aG0130000	GC
0.00577056362742625	0.324016652576752	0.315	0.239	1	Crsca17aG0129200	GC
0.00577983628973203	0.354417541170041	0.374	0.294	1	Crsca10aG0240800	GC
0.00588782585816931	0.306219815407907	0.362	0.28	1	Crsca09aG0170900	GC
0.0067672735338929	0.4114030595746	0.358	0.287	1	Crsca05aG0035900	GC
0.00758708017151908	0.374906030592252	0.303	0.232	1	Crsca06aG0050900	GC
0.00880999419389578	0.309249291445336	0.346	0.271	1	Crsca04aG0060200	GC
0.00974757152805361	0.447865338622397	0.354	0.287	1	Crsca02aG0277500	GC
0.0100576221864053	0.291855107440113	0.335	0.262	1	Crsca04aG0069000	GC
0.0102591160505059	0.403587808304182	0.295	0.232	1	Crsca03aG0053700	GC
0.0107023005144997	0.313929749758108	0.339	0.268	1	Crsca12aG0239400	GC
0.0108840536935851	0.295439303337667	0.272	0.204	1	Crsca10aG0199700	GC
0.0122864940841288	0.285403250240425	0.492	0.417	1	Crsca16aG0175200	GC
0.0128705547286301	0.356440384012827	0.287	0.217	1	Crsca05aG0181300	GC
0.0149670497475354	0.350180385244756	0.315	0.25	1	Crsca14aG0213400	GC
0.0151495918483222	0.579914614389755	0.299	0.24	1	Crsca17aG0248800	GC
0.0164646693531294	0.330434660533434	0.307	0.242	1	Crsca11aG0027800	GC
0.0168032346614143	0.439104438810603	0.276	0.221	1	Crsca04aG0209400	GC
0.0215498274166156	0.364821697334996	0.299	0.242	1	Crsca01aG0090600	GC
0.0234234238423375	0.375928011862593	0.37	0.308	1	Crsca06aG0135500	GC
0.0234467042715507	0.439330350777548	0.291	0.233	1	Crsca07aG0064000	GC
0.0253713080370633	0.432353049198259	0.268	0.212	1	Crsca07aG0223800	GC
0.0263218287132549	0.273906223438913	0.268	0.208	1	Crsca12aG0115000	GC
0.0277544566858218	0.352010597714897	0.252	0.199	1	Crsca12aG0147400	GC
0.0336456944099563	0.309383173577554	0.303	0.248	1	Crsca08aG0038700	GC
0.0371620463046865	0.269658495983887	0.37	0.309	1	Crsca05aG0072400	GC
0.0435032188674394	0.347373101454109	0.268	0.219	1	Crsca17aG0052700	GC
0.0524283460325457	0.286393256482949	0.409	0.358	1	Crsca03aG0089700	GC
0.0650975293565491	0.262130478813493	0.346	0.294	1	Crsca04aG0016100	GC
0.0703980629308427	0.393812812337029	0.299	0.256	1	Crsca16aG0174500	GC
0.0729018370791867	0.263029262840086	0.295	0.242	1	Crsca03aG0183400	GC
0.0729290889584294	0.520934710950881	0.264	0.225	1	Crsca06aG0087600	GC
0.0733761741414158	0.334399592703692	0.358	0.31	1	Crsca09aG0169100	GC
0.0748235386669083	0.286730164440774	0.327	0.278	1	Crsca13aG0228800	GC
0.0827133790014512	0.330590146620648	0.264	0.22	1	Crsca12aG0283900	GC
0.0861998977487386	0.260961954270562	0.339	0.296	1	Crsca07aG0093000	GC
0.0938029777865084	0.284438008214071	0.252	0.21	1	Crsca01aG0048300	GC
0.103420849909176	0.297857552269677	0.28	0.234	1	Crsca02aG0073800	GC
0.138891386672097	0.322082741613268	0.26	0.225	1	Crsca09aG0167500	GC
0.156295913304051	0.274174598073796	0.476	0.445	1	Crsca04aG0219600	GC
0.159089866754688	0.342277062231826	0.252	0.22	1	Crsca09aG0238900	GC
0.600009882686179	0.289708475980736	0.291	0.287	1	Crsca02aG0324400	GC
0	5.20458372840791	0.687	0.074	0	Crsca01aG0251900	MXY
0	4.88531272190215	0.778	0.179	0	Crsca02aG0039900	MXY
0	5.39244805683053	0.64	0.063	0	Crsca04aG0101900	MXY
0	4.66032964953903	0.573	0.054	0	Crsca07aG0213100	MXY
0	5.2829349987003	0.562	0.046	0	Crsca07aG0213400	MXY
0	4.25163293714652	0.669	0.165	0	Crsca13aG0134100	MXY
0	5.18683214090785	0.537	0.034	0	Crsca03aG0037000	MXY
0	4.75155056386898	0.565	0.065	0	Crsca13aG0260700	MXY
0	5.27610031873665	0.533	0.036	0	Crsca07aG0213200	MXY
0	5.05589515922506	0.522	0.038	0	Crsca17aG0118900	MXY
0	5.49847435533821	0.454	0.02	0	Crsca09aG0122400	MXY
0	5.34421298515115	0.404	0.017	0	Crsca02aG0002800	MXY
0	5.25768643417627	0.376	0.017	0	Crsca13aG0116000	MXY
0	4.61257414363903	0.379	0.025	0	Crsca09aG0175000	MXY
0	4.22402665187931	0.392	0.04	0	Crsca11aG0105300	MXY
0	5.02859842922207	0.371	0.02	0	Crsca01aG0068500	MXY
0	4.69308214597841	0.36	0.019	0	Crsca01aG0068600	MXY
0	4.62402473759016	0.351	0.022	0	Crsca06aG0209500	MXY
0	4.26954645136339	0.351	0.026	0	Crsca16aG0183700	MXY
0	5.23297882237761	0.328	0.013	0	Crsca02aG0159900	MXY
0	4.33304810840565	0.336	0.033	0	Crsca08aG0145400	MXY
0	3.82711374971832	0.34	0.041	0	Crsca04aG0136600	MXY
0	5.08680500031294	0.312	0.013	0	Crsca14aG0042100	MXY
0	4.76636998777258	0.297	0.014	0	Crsca02aG0044500	MXY
0	4.77549718712585	0.288	0.016	0	Crsca17aG0158400	MXY
0	4.24876982365395	0.297	0.03	0	Crsca06aG0202400	MXY
0	3.96276071025587	0.289	0.024	0	Crsca08aG0153500	MXY
0	4.94513595958914	0.264	0.01	0	Crsca03aG0334600	MXY
0	4.34998208902906	0.262	0.016	0	Crsca14aG0118500	MXY
1.85372265351849e-287	4.19662260868675	0.578	0.147	8.65132362397079e-283	Crsca07aG0240900	MXY
1.35373069033537e-284	3.24412625112269	0.414	0.069	6.31786113179517e-280	Crsca15aG0112800	MXY
1.71693192628421e-279	3.55876302478796	0.274	0.03	8.01292129996839e-275	Crsca04aG0231400	MXY
3.66511526599896e-279	3.77288007482647	0.471	0.095	1.71050929464171e-274	Crsca05aG0091300	MXY
2.66495773851623e-269	3.58639595559215	0.807	0.37	1.24373577656552e-264	Crsca04aG0015500	MXY
3.70015008130141e-256	3.87529043829699	0.258	0.029	1.72686004294337e-251	Crsca11aG0065300	MXY
1.5734345046189e-252	4.2330201640521	0.274	0.034	7.34321883305639e-248	Crsca02aG0098600	MXY
3.16922519231452e-223	3.5564188310401	0.305	0.047	1.47907739725319e-218	Crsca05aG0018200	MXY
2.04140877758213e-214	3.62462941605599	0.265	0.037	9.52725476497582e-210	Crsca13aG0053400	MXY
6.23139685147336e-199	3.33173079201607	0.286	0.046	2.90819291058262e-194	Crsca07aG0140300	MXY
1.66774689649856e-198	3.00701068962641	0.36	0.071	7.78337476595876e-194	Crsca15aG0229500	MXY
1.60115017351972e-194	2.8250557505136	0.471	0.123	7.47256785981653e-190	Crsca12aG0040700	MXY
3.58369333303957e-189	2.44450459808157	0.736	0.329	1.67250967852957e-184	Crsca07aG0209000	MXY
3.15402697590892e-183	2.77797869915148	0.442	0.114	1.47198438965669e-178	Crsca10aG0209800	MXY
7.70860068607957e-183	2.8925801969251	0.406	0.097	3.59760394019334e-178	Crsca09aG0271000	MXY
5.69504468044119e-181	2.16571854252837	0.724	0.324	2.6578773523619e-176	Crsca17aG0201000	MXY
1.80434562119986e-173	3.05238535983514	0.456	0.13	8.42088101413972e-169	Crsca08aG0090900	MXY
1.25773317117489e-168	2.92186255022116	0.316	0.063	5.86984070987322e-164	Crsca04aG0194900	MXY
6.23054081341926e-160	2.76810987184489	0.49	0.159	2.90779339762277e-155	Crsca06aG0230400	MXY
7.3428211934052e-160	2.62252437856619	0.53	0.183	3.42689465096221e-155	Crsca08aG0004400	MXY
6.17152189122989e-157	3.01591351928906	0.311	0.065	2.88024926663699e-152	Crsca04aG0065000	MXY
3.68918891102015e-141	2.3448039552438	0.387	0.104	1.72174446477311e-136	Crsca17aG0111600	MXY
1.51334105195155e-133	2.49665949894931	0.404	0.119	7.06276268945788e-129	Crsca05aG0185000	MXY
2.52991701396558e-128	2.23500479640355	0.552	0.22	1.18071227041774e-123	Crsca12aG0211000	MXY
1.11813346181802e-117	2.91176925642235	0.257	0.057	5.21832886630471e-113	Crsca15aG0108800	MXY
3.6694358436425e-115	2.38922891209282	0.541	0.24	1.71252570822796e-110	Crsca10aG0228300	MXY
6.33256614852105e-114	2.15210904584269	0.435	0.153	2.95540862151477e-109	Crsca17aG0172500	MXY
1.27690884939681e-113	2.72901522807509	0.448	0.162	5.95933360013491e-109	Crsca10aG0170100	MXY
1.83349451069749e-111	2.47849103586315	0.328	0.093	8.55691888142521e-107	Crsca03aG0203400	MXY
7.62939976159103e-108	2.34305588939528	0.364	0.114	3.56064086873454e-103	Crsca13aG0116400	MXY
1.38368162393895e-105	1.9700080133229	0.656	0.373	6.45764213892306e-101	Crsca06aG0198300	MXY
1.3946266265168e-103	2.63016633785194	0.273	0.07	6.50872246595391e-99	Crsca02aG0187400	MXY
6.44987331856887e-102	2.57355752053804	0.292	0.08	3.01015587777609e-97	Crsca03aG0173200	MXY
1.61775833874928e-100	2.31524292667569	0.281	0.074	7.55007816694287e-96	Crsca16aG0203200	MXY
2.03808229338341e-100	1.53509668909925	0.584	0.271	9.51173006322038e-96	Crsca13aG0228800	MXY
2.98742491100298e-94	2.01578690317537	0.323	0.097	1.39423120596509e-89	Crsca04aG0131400	MXY
1.37277559686491e-92	1.97063212260434	0.39	0.139	6.40674371056855e-88	Crsca04aG0321600	MXY
8.39011601588676e-90	1.72512325077579	0.593	0.316	3.91566714461435e-85	Crsca08aG0229400	MXY
2.06981409909908e-88	1.56937180875313	0.746	0.496	9.65982240049542e-84	Crsca04aG0333700	MXY
1.04955491653275e-77	1.47243820350203	0.525	0.254	4.89827279545836e-73	Crsca08aG0008900	MXY
5.80457381273256e-77	2.5153348097613	0.308	0.106	2.70899459840229e-72	Crsca12aG0094900	MXY
2.11116050418766e-75	1.96287598134763	0.299	0.098	9.85278607304383e-71	Crsca16aG0086000	MXY
7.53799123430662e-75	1.4641369537113	0.667	0.415	3.5179805090509e-70	Crsca03aG0148500	MXY
1.03381857963573e-73	1.7292003537267	0.49	0.24	4.82483131115994e-69	Crsca04aG0062100	MXY
6.21816039823488e-72	1.32369756967945	0.612	0.336	2.90201545785622e-67	Crsca12aG0163100	MXY
6.36422679801714e-72	2.00158466031181	0.264	0.082	2.9701846466346e-67	Crsca03aG0169600	MXY
1.18091321093367e-65	1.49475237130188	0.505	0.259	5.51132195542744e-61	Crsca01aG0290900	MXY
5.25461427259913e-65	1.4314563261586	0.451	0.21	2.45232848102201e-60	Crsca04aG0105800	MXY
4.37892708302143e-64	1.85841645074315	0.282	0.099	2.0436452696461e-59	Crsca09aG0229300	MXY
5.76491828467112e-64	0.886407085142089	0.693	0.4	2.69048736345601e-59	Crsca15aG0033100	MXY
9.55086463233123e-64	1.76226915167494	0.329	0.128	4.45738852390898e-59	Crsca04aG0300300	MXY
4.9409465135187e-63	1.85303063524711	0.365	0.157	2.30593973785918e-58	Crsca07aG0190600	MXY
3.14128405016268e-62	1.60553505326329	0.42	0.199	1.46603726621092e-57	Crsca10aG0199700	MXY
3.34001472483384e-62	2.0480605898587	0.266	0.092	1.55878487207996e-57	Crsca12aG0193600	MXY
6.92809176086512e-62	0.940395415861068	0.651	0.372	3.23334042479575e-57	Crsca01aG0244300	MXY
6.35125948094471e-61	1.33563618551569	0.463	0.228	2.9641327997569e-56	Crsca07aG0189000	MXY
8.77049822811286e-61	1.95090160471818	0.286	0.106	4.09319152306027e-56	Crsca13aG0256300	MXY
2.60916503220927e-60	1.86538822090204	0.304	0.116	1.21769732053207e-55	Crsca15aG0233300	MXY
8.94168084753573e-60	1.70669636408413	0.367	0.158	4.17308245154492e-55	Crsca16aG0109800	MXY
5.54865745283277e-59	1.52164184891792	0.478	0.256	2.58955843323705e-54	Crsca03aG0144600	MXY
7.35444878797367e-59	1.39177914531769	0.509	0.284	3.43232124934731e-54	Crsca17aG0134900	MXY
5.09677261427351e-56	1.46441648452586	0.435	0.216	2.37866377908145e-51	Crsca05aG0181400	MXY
5.15248774399113e-56	1.60208300836599	0.422	0.209	2.40466603012066e-51	Crsca16aG0090200	MXY
4.20957605231371e-53	1.71364071892523	0.276	0.105	1.96460914361481e-48	Crsca16aG0114900	MXY
6.25829124575124e-53	1.41912264975766	0.422	0.209	2.9207445243921e-48	Crsca06aG0121900	MXY
9.52390879494666e-53	1.44566059952443	0.426	0.216	4.4448082346016e-48	Crsca10aG0231200	MXY
1.66044170016439e-52	1.79888356565486	0.28	0.109	7.7492814146672e-48	Crsca12aG0105900	MXY
1.88804103144105e-52	1.82428213218599	0.27	0.103	8.81148749373536e-48	Crsca08aG0004100	MXY
2.5774879821948e-52	0.530012824575908	0.764	0.494	1.20291364129031e-47	Crsca12aG0024400	MXY
2.3796588769129e-51	1.22332093089734	0.414	0.195	1.11058679785525e-46	Crsca16aG0102300	MXY
7.2591590979962e-51	0.572800170476792	0.767	0.522	3.38784955103483e-46	Crsca11aG0259500	MXY
9.98618452410727e-51	0.606821459652667	0.47	0.224	4.66055231740086e-46	Crsca04aG0324900	MXY
9.83714399753688e-50	0.609622431368449	0.621	0.35	4.59099510365046e-45	Crsca16aG0205100	MXY
3.89609805405638e-49	1.39020571023167	0.456	0.252	1.81830896182811e-44	Crsca16aG0174500	MXY
1.79406795809045e-48	0.446080615461645	0.553	0.282	8.37291516040811e-44	Crsca09aG0277300	MXY
9.41261339855101e-48	1.31689937501598	0.379	0.179	4.39286667310376e-43	Crsca13aG0250000	MXY
1.12833668795768e-47	0.896065775376766	0.588	0.345	5.26594732269848e-43	Crsca02aG0139700	MXY
1.28794394255411e-47	1.54758881932326	0.361	0.176	6.01083437990002e-43	Crsca14aG0185200	MXY
2.91827722412161e-47	1.11010462482426	0.461	0.241	1.36195998049756e-42	Crsca06aG0260000	MXY
4.81673349910582e-46	1.49603827319542	0.345	0.16	2.24796952403269e-41	Crsca09aG0271300	MXY
1.38106027934195e-45	1.10271457678069	0.446	0.233	6.4454083236889e-41	Crsca15aG0018500	MXY
8.61491080935847e-45	1.35982033357701	0.39	0.196	4.0205788747276e-40	Crsca11aG0193500	MXY
9.71857526856682e-45	0.786857500340238	0.533	0.286	4.53565907784014e-40	Crsca12aG0094000	MXY
1.95495701190196e-44	1.73171752349518	0.288	0.125	9.12378437454646e-40	Crsca16aG0047900	MXY
5.24004691429069e-44	1.47962986150153	0.258	0.102	2.44552989489947e-39	Crsca10aG0131400	MXY
5.85920862737877e-44	0.939147119127862	0.618	0.411	2.73449266639767e-39	Crsca04aG0143400	MXY
7.23406627854617e-44	0.379588805781751	0.514	0.269	3.3761387321975e-39	Crsca09aG0270000	MXY
2.5325492890727e-43	1.64324	0.386	0.204	1.18194075321023e-38	Crsca06aG0155500	MXY
3.44997039819669e-43	0.535839110242935	0.771	0.564	1.6101011848384e-38	Crsca04aG0318700	MXY
7.99008143180655e-43	1.35573609782703	0.487	0.283	3.72897100422411e-38	Crsca02aG0277500	MXY
2.36036278214512e-42	1.61360355283333	0.331	0.162	1.10158131042713e-37	Crsca08aG0002800	MXY
5.03036135180052e-42	1.36226583689651	0.282	0.118	2.3476696428853e-37	Crsca06aG0267600	MXY
1.090114979603e-41	1.50182405812455	0.333	0.162	5.0875666098072e-37	Crsca04aG0048000	MXY
1.28724224156651e-41	1.64774609420659	0.253	0.104	6.00755954139091e-37	Crsca15aG0034600	MXY
2.00485408951855e-41	0.58992853526133	0.564	0.322	9.35665403578305e-37	Crsca17aG0206500	MXY
2.7976998787693e-41	0.325408347078283	0.446	0.223	1.30568653342163e-36	Crsca10aG0189000	MXY
1.39336325598838e-40	1.07511606324312	0.586	0.4	6.50282631569779e-36	Crsca08aG0072900	MXY
5.69078008896631e-40	1.24796516775741	0.491	0.305	2.65588706752057e-35	Crsca05aG0072400	MXY
2.18471962485864e-39	0.346330147611049	0.671	0.434	1.01960864892153e-34	Crsca04aG0246900	MXY
3.73409277802452e-39	1.00978274330532	0.542	0.35	1.74270109950404e-34	Crsca11aG0263700	MXY
2.38748709161415e-38	0.667808637733727	0.58	0.346	1.11424022565632e-33	Crsca01aG0088500	MXY
2.98247513984716e-38	0.799038008194224	0.416	0.212	1.39192114776667e-33	Crsca07aG0160200	MXY
7.06595715922443e-38	1.53179872365439	0.272	0.121	3.29768220621004e-33	Crsca17aG0007900	MXY
2.19252641936373e-37	0.533004766121282	0.522	0.287	1.02325207991705e-32	Crsca07aG0197500	MXY
2.39420054719012e-37	1.52398763541686	0.28	0.129	1.11737339537363e-32	Crsca11aG0034200	MXY
4.06514368821147e-37	0.476980680117004	0.462	0.241	1.89720255928829e-32	Crsca14aG0038900	MXY
7.17022468370102e-37	0.978453758242252	0.475	0.285	3.34634385988327e-32	Crsca12aG0084600	MXY
8.88628332386185e-37	0.84677277459959	0.349	0.167	4.14722842724633e-32	Crsca01aG0010600	MXY
6.18395379117564e-36	1.26204510475652	0.319	0.155	2.88605123434167e-31	Crsca11aG0025100	MXY
7.6629899486855e-36	0.557611478805883	0.293	0.131	3.57631740905152e-31	Crsca16aG0145200	MXY
8.43825060470598e-36	1.15805642352803	0.479	0.304	3.93813155721628e-31	Crsca06aG0135500	MXY
8.60251271431568e-36	1.16822613352303	0.356	0.184	4.01479268377113e-31	Crsca02aG0160000	MXY
1.01986515064134e-35	0.497012101749101	0.44	0.23	4.75971065804313e-31	Crsca12aG0029100	MXY
1.02476891633362e-35	1.34863968806031	0.345	0.179	4.78259653252901e-31	Crsca05aG0032600	MXY
1.52515555837921e-35	1.5007879768584	0.276	0.128	7.11790099095577e-31	Crsca09aG0042800	MXY
1.97978668873952e-35	1.06058911050094	0.365	0.186	9.23966447634735e-31	Crsca12aG0013100	MXY
2.96873643194393e-35	1.00214554817145	0.436	0.25	1.38550929278823e-30	Crsca06aG0274700	MXY
5.23845310049199e-35	1.64468177642539	0.345	0.187	2.44478606199961e-30	Crsca04aG0209600	MXY
4.32580372451244e-34	0.343965219291235	0.548	0.308	2.01885259822995e-29	Crsca07aG0050800	MXY
4.43993423071003e-34	1.23459664856999	0.312	0.154	2.07211730547237e-29	Crsca17aG0195100	MXY
1.04989232100762e-33	1.31925461331507	0.336	0.178	4.89984746214256e-29	Crsca13aG0072900	MXY
1.75510399519555e-33	1.21435587889271	0.309	0.152	8.19107034557763e-29	Crsca01aG0100200	MXY
7.1496919715141e-33	1.31079810663028	0.315	0.161	3.33676124310563e-28	Crsca06aG0145700	MXY
1.13589874929505e-32	1.12378643875274	0.273	0.125	5.30123946295998e-28	Crsca02aG0327700	MXY
1.30941173853018e-32	1.2156503464938	0.399	0.238	6.11102458372033e-28	Crsca01aG0090600	MXY
1.326266538437e-32	0.96978046528923	0.412	0.234	6.18968593488549e-28	Crsca03aG0049900	MXY
2.02258303182156e-32	0.480887337666203	0.639	0.426	9.43939500951122e-28	Crsca17aG0175900	MXY
2.39937597168358e-32	0.698780157802282	0.26	0.113	1.11978876598473e-27	Crsca08aG0056100	MXY
3.06437665695675e-32	0.947964451441396	0.373	0.202	1.43014458580172e-27	Crsca05aG0098500	MXY
4.12413471784999e-32	1.34712913549074	0.325	0.173	1.92473367282059e-27	Crsca13aG0246800	MXY
5.34512151612001e-32	0.930158127721711	0.444	0.263	2.49456821157321e-27	Crsca16aG0192200	MXY
5.4370270368313e-32	0.98570076802605	0.455	0.284	2.53746051808917e-27	Crsca14aG0226600	MXY
8.33682539920492e-32	0.590811612432936	0.502	0.291	3.89079641380894e-27	Crsca17aG0136500	MXY
9.54116722872301e-32	0.606365313176481	0.53	0.329	4.45286274564503e-27	Crsca08aG0086500	MXY
1.02785195055214e-31	0.765481623373775	0.378	0.2	4.79698505322683e-27	Crsca01aG0083200	MXY
1.49444372979237e-31	1.05528745635298	0.375	0.212	6.97456888694099e-27	Crsca10aG0239400	MXY
2.7796595628169e-30	0.598012258234903	0.505	0.302	1.29726711796665e-25	Crsca16aG0149600	MXY
7.47381341754215e-30	0.43027564364123	0.562	0.348	3.48802872196692e-25	Crsca13aG0119300	MXY
7.66675084653396e-30	1.23351861679729	0.273	0.135	3.5780726200774e-25	Crsca12aG0257700	MXY
3.03453382095e-29	1.01357903444591	0.34	0.183	1.41621693423737e-24	Crsca03aG0217300	MXY
3.16825390126753e-29	0.270852227907667	0.809	0.637	1.47862409572155e-24	Crsca07aG0130000	MXY
7.41472652533205e-29	0.456950454679804	0.596	0.396	3.46045286937247e-24	Crsca13aG0099000	MXY
8.53872841706355e-29	0.610039390187513	0.345	0.176	3.98502455224356e-24	Crsca06aG0173000	MXY
1.067337717489e-28	0.930074105921367	0.299	0.148	4.98126512752115e-24	Crsca10aG0133800	MXY
1.30657450706799e-28	0.914919742914203	0.518	0.362	6.09778322448633e-24	Crsca11aG0145100	MXY
2.27674575172918e-28	1.32235134601777	0.288	0.151	1.06255724233201e-23	Crsca15aG0122400	MXY
2.61221267503427e-28	0.378525160075423	0.705	0.49	1.21911965543849e-23	Crsca04aG0002300	MXY
4.15295035975882e-28	0.99664555226213	0.424	0.269	1.93818193289944e-23	Crsca06aG0175600	MXY
5.08983071635718e-28	0.734118551155219	0.653	0.51	2.3754239953239e-23	Crsca06aG0124400	MXY
1.09978732645775e-27	1.23359716742595	0.3	0.16	5.13270745257832e-23	Crsca15aG0123100	MXY
2.17701535457167e-27	0.731691424123952	0.483	0.301	1.0160130659786e-22	Crsca05aG0150200	MXY
2.17837896978549e-27	1.24914970890516	0.308	0.169	1.01664946519889e-22	Crsca07aG0136600	MXY
2.19531310459018e-27	1.32634918316408	0.285	0.149	1.02455262591224e-22	Crsca04aG0003500	MXY
3.4396269116161e-27	0.44850473188358	0.336	0.174	1.60527387965123e-22	Crsca03aG0299300	MXY
5.36189495360539e-27	1.2061241035465	0.266	0.135	2.50239637484763e-22	Crsca07aG0103200	MXY
9.78192207743937e-27	0.831087822937733	0.308	0.158	4.56522303354095e-22	Crsca11aG0065700	MXY
1.33690732358184e-26	0.740437251898945	0.592	0.442	6.23934647915644e-22	Crsca04aG0219600	MXY
5.31863369586831e-26	1.25639666342859	0.312	0.176	2.48220634586174e-21	Crsca05aG0060600	MXY
6.88969654307565e-26	0.789627906191695	0.459	0.293	3.21542137665341e-21	Crsca07aG0093000	MXY
1.00576462214574e-25	0.502748745219917	0.369	0.2	4.69390349155417e-21	Crsca07aG0057000	MXY
1.52851651147252e-25	0.854705627037248	0.303	0.159	7.13358655904227e-21	Crsca14aG0227000	MXY
1.70087420466161e-25	0.609472254008118	0.506	0.334	7.93797991315575e-21	Crsca10aG0173000	MXY
2.95156617362611e-25	0.971595977530427	0.407	0.256	1.37749593323131e-20	Crsca09aG0275100	MXY
7.00078156487754e-25	0.956016715768531	0.252	0.124	3.26726475632835e-20	Crsca14aG0209100	MXY
9.66575358997497e-25	0.994604541378888	0.434	0.291	4.51100720044132e-20	Crsca11aG0229800	MXY
1.12867980974355e-24	0.895187737610399	0.327	0.182	5.26754867207312e-20	Crsca16aG0180600	MXY
2.40957935448249e-24	1.00714159778106	0.408	0.269	1.12455068473698e-19	Crsca04aG0060200	MXY
3.77997486472771e-24	0.937086033600181	0.34	0.195	1.76411426936842e-19	Crsca05aG0158500	MXY
4.38481770390853e-24	1.25341443791787	0.25	0.13	2.04639442241411e-19	Crsca06aG0153100	MXY
8.23560784424445e-24	0.99113229427437	0.41	0.264	3.84355818090889e-19	Crsca04aG0049000	MXY
1.3656063613731e-23	0.95448459756728	0.427	0.281	6.37328488852824e-19	Crsca04aG0130600	MXY
1.38626798001745e-23	0.74273866753344	0.463	0.298	6.46971266274146e-19	Crsca10aG0034000	MXY
4.76281131865154e-23	0.845048809971822	0.473	0.327	2.22280404241467e-18	Crsca11aG0083600	MXY
5.50526085157423e-23	0.77586480522689	0.329	0.186	2.56930523942969e-18	Crsca13aG0238100	MXY
7.96511546163171e-23	1.19784225506311	0.292	0.164	3.71731938594352e-18	Crsca08aG0124800	MXY
8.69372786078041e-23	1.08026597446637	0.308	0.179	4.05736279262622e-18	Crsca10aG0087600	MXY
9.388988188788e-23	0.575590890792683	0.324	0.178	4.38184078770736e-18	Crsca15aG0144900	MXY
1.59502699627266e-22	0.97627000768013	0.357	0.22	7.4439909916045e-18	Crsca02aG0210200	MXY
1.63818719071133e-22	0.593841743928523	0.424	0.258	7.64541961904979e-18	Crsca16aG0132900	MXY
3.58512032137031e-22	0.388970595686024	0.782	0.666	1.67317565398352e-17	Crsca12aG0069800	MXY
5.09883540862479e-22	1.13608445243755	0.285	0.16	2.37962648520519e-17	Crsca01aG0091600	MXY
9.21435333519108e-22	0.937461298277306	0.4	0.266	4.30033870153368e-17	Crsca08aG0208100	MXY
1.84382597474361e-21	0.778743832705926	0.522	0.387	8.60513582412844e-17	Crsca13aG0186600	MXY
2.01924960212016e-21	0.346921138552022	0.554	0.375	9.42383789309481e-17	Crsca03aG0331200	MXY
5.74522988532941e-21	0.884033804983041	0.355	0.221	2.68129878748323e-16	Crsca01aG0225100	MXY
6.6449303405691e-21	1.14891211953212	0.485	0.355	3.1011889899436e-16	Crsca17aG0005400	MXY
7.64625717234543e-21	0.679632439410062	0.276	0.151	3.56850822233361e-16	Crsca01aG0034900	MXY
9.06244546260627e-21	0.995465109952295	0.325	0.199	4.22944329739835e-16	Crsca14aG0119500	MXY
1.50093811327614e-20	0.463216990964358	0.655	0.509	7.00487817465977e-16	Crsca10aG0055600	MXY
1.5382028556115e-20	0.706197955787334	0.282	0.153	7.17879272713889e-16	Crsca07aG0032700	MXY
3.73621077586173e-20	0.518238957770998	0.6	0.443	1.74368956909467e-15	Crsca05aG0028200	MXY
3.99950072822687e-20	1.08828579031859	0.264	0.15	1.86656698986348e-15	Crsca17aG0135600	MXY
5.07928069150592e-20	0.431235124024598	0.411	0.254	2.37050029872581e-15	Crsca07aG0130200	MXY
5.68909990143079e-20	0.838819115726383	0.337	0.207	2.65510292399775e-15	Crsca01aG0036900	MXY
6.67011567013342e-20	0.267006676726817	0.802	0.688	3.11294298325127e-15	Crsca15aG0003400	MXY
1.43567982464257e-19	0.943207653974592	0.295	0.174	6.70031774160688e-15	Crsca02aG0170700	MXY
1.58741633336112e-19	0.881491200023609	0.486	0.367	7.40847202779635e-15	Crsca04aG0220300	MXY
3.86267274819816e-19	0.562666020247895	0.343	0.201	1.80270937158408e-14	Crsca01aG0197000	MXY
6.65678336049194e-19	1.00109804750693	0.311	0.191	3.10672079434159e-14	Crsca15aG0130600	MXY
8.54471652804664e-19	1.07907180225148	0.301	0.184	3.98781920363937e-14	Crsca14aG0198700	MXY
9.71463501325992e-19	0.454116442313756	0.462	0.303	4.53382016068841e-14	Crsca08aG0096800	MXY
1.06878316064231e-18	0.279633065822454	0.568	0.397	4.98801101071766e-14	Crsca14aG0140200	MXY
2.85891940156715e-18	0.409531573042997	0.482	0.324	1.33425768471139e-13	Crsca17aG0133600	MXY
2.91538020981347e-18	1.5749081608698	0.282	0.178	1.36060794391995e-13	Crsca17aG0139900	MXY
4.35183481438674e-18	0.349182396689687	0.797	0.692	2.03100130787429e-13	Crsca17aG0138700	MXY
5.09037883945987e-18	0.405810478809901	0.68	0.537	2.37567980437592e-13	Crsca11aG0029900	MXY
2.46530249105222e-17	0.951027756687316	0.296	0.183	1.15055667257407e-12	Crsca04aG0329200	MXY
3.52792985380293e-17	0.362871825283905	0.526	0.376	1.64648486276983e-12	Crsca04aG0023200	MXY
9.2205832550528e-17	0.409716569214573	0.331	0.2	4.30324620513314e-12	Crsca12aG0084300	MXY
1.0760755784549e-16	0.305800905623694	0.535	0.377	5.02204472464902e-12	Crsca17aG0140200	MXY
1.35172244749606e-16	0.56462232334772	0.286	0.165	6.30848866246413e-12	Crsca09aG0239900	MXY
1.73774179320612e-16	0.463888575669371	0.44	0.297	8.11004094889297e-12	Crsca06aG0128600	MXY
2.61769059348952e-16	0.67207970854131	0.483	0.361	1.22167619998156e-11	Crsca07aG0146000	MXY
2.96147031670858e-16	0.497164186749968	0.442	0.306	1.38211819680789e-11	Crsca11aG0207500	MXY
3.04439162163293e-16	0.764933718631609	0.277	0.166	1.42081756981609e-11	Crsca04aG0084800	MXY
3.82785670382084e-16	0.442265022100318	0.321	0.195	1.78646072367319e-11	Crsca01aG0295900	MXY
4.27804284276343e-16	0.468126083621447	0.627	0.514	1.9965625947177e-11	Crsca14aG0012400	MXY
5.68198606895637e-16	0.502028712553746	0.293	0.173	2.65178289838194e-11	Crsca11aG0184300	MXY
6.07371044299429e-16	0.837087542261249	0.292	0.181	2.83460066374544e-11	Crsca08aG0054500	MXY
9.28556313861872e-16	0.731169063779871	0.276	0.166	4.33357231679336e-11	Crsca07aG0167900	MXY
1.1215667504719e-15	0.990115651406914	0.344	0.239	5.23435202445236e-11	Crsca10aG0065700	MXY
1.30892309700365e-15	0.921338019162133	0.301	0.193	6.10874409371602e-11	Crsca04aG0152000	MXY
1.32009647203121e-15	1.00080568094853	0.266	0.165	6.16089023496965e-11	Crsca01aG0032000	MXY
1.32790155552774e-15	0.857072512501514	0.305	0.194	6.19731655964795e-11	Crsca01aG0005300	MXY
1.43759952142562e-15	0.923738178814607	0.303	0.196	6.70927696649335e-11	Crsca02aG0288700	MXY
2.78858284019438e-15	0.362088171464339	0.74	0.658	1.30143161151872e-10	Crsca09aG0206400	MXY
3.74520668077056e-15	0.734649363867239	0.364	0.247	1.74788795791562e-10	Crsca14aG0213400	MXY
5.29091756463932e-15	0.702835611437611	0.398	0.28	2.46927122741717e-10	Crsca09aG0062300	MXY
7.64033318838023e-15	0.667195011822313	0.343	0.229	3.56574349901705e-10	Crsca12aG0087300	MXY
9.3836486808421e-15	0.91025787472537	0.268	0.166	4.37934883934901e-10	Crsca14aG0030200	MXY
1.94418188105697e-14	0.9416693367683	0.272	0.172	9.0734968388929e-10	Crsca10aG0015700	MXY
1.95047951851006e-14	0.539772664680423	0.42	0.294	9.10288791288644e-10	Crsca01aG0033000	MXY
4.08139370352738e-14	0.514957543299888	0.566	0.456	1.90478644143623e-09	Crsca07aG0124300	MXY
5.63217510315601e-14	0.762523611566722	0.4	0.292	2.62853612064291e-09	Crsca01aG0225300	MXY
6.4674649982809e-14	0.692175472848497	0.491	0.381	3.01836591469770e-09	Crsca09aG0133400	MXY
7.47081771903328e-14	0.755942639140833	0.317	0.211	3.48663062947283e-09	Crsca12aG0075100	MXY
3.22474740103149e-13	0.757160470677049	0.351	0.248	1.5049896120614e-08	Crsca17aG0099700	MXY
4.58292067227069e-13	0.472041045020063	0.442	0.327	2.13884907774873e-08	Crsca17aG0117600	MXY
1.31397812313705e-12	0.450196624718827	0.699	0.631	6.1323359006806e-08	Crsca16aG0143600	MXY
2.21539540706968e-12	0.885741660119643	0.254	0.165	1.03392503647942e-07	Crsca03aG0236100	MXY
3.09760458644353e-12	0.635735746799384	0.339	0.238	1.44565206049319e-07	Crsca02aG0014900	MXY
4.72594907302569e-12	0.43252998392184	0.26	0.158	2.20560043238109e-07	Crsca16aG0200700	MXY
5.63416105246795e-12	0.879880400629862	0.274	0.184	2.62946296318679e-07	Crsca05aG0038700	MXY
6.57220696409117e-12	0.465772675349482	0.368	0.254	3.06724899014135e-07	Crsca13aG0005800	MXY
6.89951374599862e-12	0.379794628326188	0.473	0.356	3.22000306525756e-07	Crsca03aG0089700	MXY
8.30174279771861e-12	0.803678619485055	0.25	0.161	3.87442336369528e-07	Crsca17aG0032500	MXY
9.49604918364027e-12	0.818719518285746	0.253	0.165	4.43180615400491e-07	Crsca12aG0189200	MXY
1.00438910710627e-11	0.787021923237256	0.269	0.178	4.68748396286497e-07	Crsca08aG0026100	MXY
1.12407522805323e-11	1.34573703875624	0.266	0.183	5.24605908932445e-07	Crsca02aG0224000	MXY
1.20519305218995e-11	0.852484895801162	0.313	0.223	5.62463597457048e-07	Crsca06aG0087600	MXY
1.46387497826874e-11	0.671665830797521	0.256	0.165	6.83190452358023e-07	Crsca14aG0040500	MXY
1.6145746174227e-11	0.571775882839448	0.406	0.304	7.53521973951176e-07	Crsca11aG0189200	MXY
1.62472781524523e-11	0.414016632759643	0.514	0.399	7.58260471374947e-07	Crsca15aG0126700	MXY
1.8837098415416e-11	0.791479752172075	0.253	0.166	8.79127383047463e-07	Crsca05aG0131800	MXY
1.90362854972599e-11	0.711765261751936	0.301	0.208	8.88423444157121e-07	Crsca01aG0048300	MXY
2.06590543140043e-11	0.761828369912259	0.258	0.17	9.6415806483458e-07	Crsca11aG0041200	MXY
2.20714998048798e-11	0.637870616425314	0.376	0.278	1.03007689589374e-06	Crsca14aG0199100	MXY
2.80603372934032e-11	0.564780597741896	0.388	0.283	1.30957594148313e-06	Crsca17aG0121900	MXY
2.91566579614569e-11	0.751964564733482	0.27	0.182	1.36074122706119e-06	Crsca17aG0171500	MXY
3.0625961475262e-11	0.852397374818251	0.292	0.204	1.42931362205048e-06	Crsca06aG0268800	MXY
3.3160093453033e-11	0.585216990135434	0.364	0.264	1.54758156145305e-06	Crsca12aG0236000	MXY
4.58574950953221e-11	0.654912739061245	0.252	0.163	2.14016929609868e-06	Crsca16aG0086100	MXY
5.45935320251368e-11	0.357105013978526	0.549	0.445	2.54788013961313e-06	Crsca10aG0171700	MXY
5.55914757492043e-11	0.543659486491124	0.301	0.207	2.59445417321536e-06	Crsca11aG0179800	MXY
6.89895572501516e-11	0.72005805929809	0.254	0.167	3.21974263686458e-06	Crsca01aG0145000	MXY
1.11474141690554e-10	0.775595789665422	0.313	0.228	5.20249819269815e-06	Crsca14aG0112400	MXY
1.62665162859885e-10	0.269248242793248	0.316	0.207	7.59158315067082e-06	Crsca13aG0121500	MXY
1.75868858595505e-10	0.451843576012068	0.277	0.183	8.20779963065223e-06	Crsca04aG0284500	MXY
4.38004061238098e-10	0.468482995623113	0.357	0.259	2.04416495379821e-05	Crsca13aG0067600	MXY
9.4837426038125e-10	0.762882589740219	0.277	0.197	4.42606267319929e-05	Crsca12aG0147400	MXY
9.49698145724665e-10	0.775346831709722	0.373	0.293	4.43224124609701e-05	Crsca04aG0016100	MXY
1.16466571978874e-09	0.404700847860962	0.274	0.182	5.43549491425404e-05	Crsca09aG0033900	MXY
1.29045078293251e-09	0.281949454641075	0.281	0.186	6.02253380394602e-05	Crsca12aG0288700	MXY
1.37388387835675e-09	0.471832421290292	0.265	0.177	6.41191606029096e-05	Crsca11aG0136700	MXY
2.40410373518786e-09	0.273597688530358	0.25	0.162	0.000112199521321217	Crsca10aG0059200	MXY
2.6557823735936e-09	0.471775208780028	0.348	0.254	0.000123945363375613	Crsca04aG0241300	MXY
2.71881689832243e-09	0.308838001930589	0.309	0.213	0.000126887184644708	Crsca04aG0189800	MXY
3.26713145963772e-09	0.359447618354958	0.3	0.212	0.000152477025221292	Crsca17aG0230500	MXY
4.54864339230944e-09	0.342770730678447	0.365	0.265	0.000212285187119082	Crsca06aG0197000	MXY
4.68024624872836e-09	0.673942175902941	0.292	0.212	0.000218427092428152	Crsca15aG0206400	MXY
4.7235377991815e-09	0.690784952682016	0.285	0.205	0.000220447509087801	Crsca14aG0213500	MXY
1.2305287843383e-08	0.324173751930576	0.274	0.186	0.000574287783650682	Crsca13aG0160300	MXY
2.0254086717052e-08	0.393820646839724	0.345	0.255	0.000945258227084815	Crsca08aG0118300	MXY
2.76123242533305e-08	0.503386103813959	0.402	0.314	0.00128866717290293	Crsca08aG0025900	MXY
3.19274730873544e-08	0.363027575201054	0.335	0.246	0.00149005516898683	Crsca15aG0084900	MXY
3.97244271313885e-08	0.542220874164436	0.391	0.314	0.0018539390142219	Crsca12aG0115800	MXY
4.4639951793583e-08	0.518206894919769	0.327	0.248	0.00208334655020652	Crsca05aG0133600	MXY
7.4266461820871e-08	0.544302682386899	0.252	0.178	0.00346601577318005	Crsca07aG0106700	MXY
9.29301441282802e-08	0.912601798752241	0.262	0.193	0.00433704982646684	Crsca10aG0184300	MXY
1.00342128286862e-07	0.479878649918368	0.398	0.321	0.00468296712714787	Crsca08aG0015300	MXY
1.04543285085959e-07	0.582290375590178	0.262	0.19	0.0048790351149617	Crsca04aG0004900	MXY
1.06389501336643e-07	0.681047004819554	0.25	0.181	0.00496519802738111	Crsca03aG0074200	MXY
1.12075024893056e-07	0.405929179806877	0.485	0.4	0.00523054141175894	Crsca15aG0096300	MXY
1.26028158916969e-07	0.752419095535111	0.253	0.186	0.00588173417665494	Crsca14aG0052300	MXY
1.79536839179373e-07	0.390766510242329	0.331	0.252	0.00837898428450135	Crsca01aG0092200	MXY
2.24237677069797e-07	0.426907884708743	0.462	0.392	0.0104651723888474	Crsca09aG0006000	MXY
2.28450335351485e-07	0.423506842182448	0.317	0.238	0.0106617771508538	Crsca01aG0027500	MXY
2.66359640483945e-07	0.608941090991439	0.262	0.193	0.0124310044213857	Crsca14aG0066400	MXY
2.97462234023314e-07	0.60098512451277	0.276	0.206	0.013882562461868	Crsca05aG0102900	MXY
4.33415133449317e-07	0.573169877794043	0.256	0.187	0.0202274842780796	Crsca08aG0066000	MXY
6.32272767542773e-07	0.487959427224956	0.28	0.208	0.0295081700612212	Crsca12aG0029600	MXY
6.63983406088284e-07	0.372645807865993	0.458	0.381	0.0309881055621402	Crsca12aG0257800	MXY
6.77402203118829e-07	0.661514253757753	0.284	0.219	0.0316143608195558	Crsca10aG0149900	MXY
6.90149802292432e-07	0.333552620269065	0.363	0.283	0.0322092912729878	Crsca13aG0240600	MXY
7.13622501097618e-07	0.601336103233888	0.304	0.239	0.0333047621262258	Crsca17aG0248800	MXY
8.33637326738229e-07	0.539749874302865	0.373	0.304	0.0389058540388732	Crsca04aG0029100	MXY
9.70571593459457e-07	0.33407578336965	0.296	0.22	0.0452965762667528	Crsca12aG0054500	MXY
1.91655408555582e-06	0.55276497965481	0.313	0.244	0.0894455791728902	Crsca15aG0157300	MXY
3.64222509763309e-06	0.348958761811978	0.424	0.355	0.169982645306536	Crsca05aG0108900	MXY
4.65231572053308e-06	0.532472818939275	0.328	0.267	0.217123574677279	Crsca05aG0190400	MXY
4.77098886596746e-06	0.438834747308267	0.261	0.195	0.222662050374701	Crsca09aG0276400	MXY
8.66728507815395e-06	0.512028321407061	0.311	0.247	0.404502194597445	Crsca14aG0073300	MXY
1.11449820785971e-05	0.305256050168948	0.258	0.191	0.520136313608127	Crsca07aG0043700	MXY
1.13626303658779e-05	0.334737251026719	0.261	0.197	0.530293959175521	Crsca17aG0116000	MXY
1.30906054903914e-05	0.519579534221156	0.273	0.212	0.610938558236564	Crsca14aG0226000	MXY
1.3138875487347e-05	0.428514322594782	0.265	0.201	0.613191318994486	Crsca15aG0237500	MXY
1.42782713888161e-05	0.806954876049549	0.264	0.212	0.666366925716047	Crsca04aG0015900	MXY
1.45567034685948e-05	0.314513821798061	0.403	0.333	0.67936135087932	Crsca17aG0209000	MXY
1.85709915482569e-05	0.515196361574462	0.25	0.192	0.866708175557148	Crsca11aG0099800	MXY
3.04313993532201e-05	0.382241548784523	0.296	0.233	1	Crsca06aG0141300	MXY
4.61235777264487e-05	0.389400978948832	0.47	0.422	1	Crsca11aG0216700	MXY
5.62096430923826e-05	0.51323764065639	0.324	0.271	1	Crsca10aG0166100	MXY
7.18854742751739e-05	0.325878044539684	0.467	0.41	1	Crsca02aG0043100	MXY
8.61424246441455e-05	0.570131168313575	0.299	0.247	1	Crsca08aG0038700	MXY
0.000102975793803189	0.308929798898515	0.343	0.282	1	Crsca01aG0155400	MXY
0.000108563947964859	0.525989353886849	0.299	0.249	1	Crsca02aG0016700	MXY
0.00011622551902263	0.484353292474084	0.268	0.215	1	Crsca05aG0079600	MXY
0.0001170251116045	0.547244753127719	0.257	0.206	1	Crsca17aG0187800	MXY
0.000127676611041754	0.416799577152199	0.276	0.223	1	Crsca10aG0197800	MXY
0.000128352524118861	0.448495676191018	0.335	0.283	1	Crsca03aG0231000	MXY
0.000130566537893781	0.469787697444742	0.451	0.408	1	Crsca01aG0226400	MXY
0.000186136150038245	0.317506343333732	0.307	0.252	1	Crsca05aG0194300	MXY
0.000257417201805762	0.253558287015125	0.257	0.201	1	Crsca09aG0246500	MXY
0.000360356094502577	0.33028385199291	0.284	0.232	1	Crsca04aG0200400	MXY
0.000390555176644446	0.432514109801661	0.288	0.24	1	Crsca04aG0226000	MXY
0.000421319301686942	0.684286634294822	0.254	0.212	1	Crsca15aG0004400	MXY
0.00141810091360718	0.382983622706789	0.315	0.271	1	Crsca10aG0133600	MXY
0.00163564569092018	0.264350557111818	0.316	0.267	1	Crsca12aG0239400	MXY
0.00312184385350313	0.358326454779489	0.293	0.256	1	Crsca08aG0229800	MXY
0.00619983672666057	0.255308348430093	0.26	0.22	1	Crsca04aG0211400	MXY
0.00661266955373627	0.35971952958863	0.258	0.222	1	Crsca04aG0057800	MXY
0.00701514843271114	0.327106431740175	0.383	0.346	1	Crsca09aG0198700	MXY
0.00876509461774132	0.265324042272642	0.514	0.492	1	Crsca12aG0075800	MXY
0.00934838638295431	0.281522679522659	0.387	0.353	1	Crsca11aG0099000	MXY
0.00997931001177009	0.423999465013424	0.289	0.259	1	Crsca02aG0065800	MXY
0.016058321507941	0.335178855356572	0.266	0.235	1	Crsca09aG0138500	MXY
0.0212540274406287	0.271275712929246	0.325	0.294	1	Crsca10aG0240800	MXY
0.0246060152931892	0.28795011157928	0.315	0.286	1	Crsca15aG0012900	MXY
0.0298792184456954	0.320696489314755	0.303	0.277	1	Crsca11aG0066500	MXY
0.0332319988471876	0.25315152011077	0.282	0.254	1	Crsca06aG0013800	MXY
0.0368143063132534	0.311811064706494	0.26	0.232	1	Crsca12aG0287600	MXY
0.0369236388574821	0.284684703889576	0.253	0.229	1	Crsca03aG0132500	MXY
0.039388504398709	0.251650178131244	0.256	0.23	1	Crsca17aG0018000	MXY
0.0431637688662165	0.362796391385276	0.256	0.233	1	Crsca02aG0005200	MXY
0.070099800256831	0.274404898934735	0.296	0.279	1	Crsca11aG0133300	MXY
0.0798177972174141	0.427642655429246	0.311	0.296	1	Crsca15aG0015000	MXY
0.0941491990110853	0.369797016995009	0.293	0.28	1	Crsca09aG0170900	MXY
0.16106700731973	0.337215681234243	0.262	0.246	1	Crsca15aG0194000	MXY
0.433383378287314	1.42854093181906	0.225	0.27	1	Crsca09aG0113200	MXY
0	7.15108275568603	0.723	0.017	0	Crsca02aG0095700	CC
0	6.38906464943405	0.716	0.036	0	Crsca09aG0081000	CC
0	6.69544725066053	0.697	0.027	0	Crsca07aG0218200	CC
0	6.17949586565255	0.665	0.019	0	Crsca13aG0175200	CC
0	6.1776433509461	0.665	0.025	0	Crsca06aG0193600	CC
0	6.16794395602775	0.658	0.028	0	Crsca02aG0010100	CC
0	6.3968543478309	0.516	0.012	0	Crsca17aG0223700	CC
0	7.10351121779201	0.445	0.007	0	Crsca02aG0315500	CC
0	6.38033157363227	0.381	0.009	0	Crsca15aG0166000	CC
0	6.29026165420763	0.368	0.008	0	Crsca09aG0011500	CC
0	6.47318436073597	0.361	0.008	0	Crsca07aG0134400	CC
0	5.47725190455139	0.335	0.009	0	Crsca02aG0140600	CC
0	7.27186381120254	0.329	0.006	0	Crsca13aG0261000	CC
0	6.10500100499653	0.329	0.009	0	Crsca07aG0201100	CC
0	6.31270369035115	0.316	0.007	0	Crsca02aG0167000	CC
0	6.63345861609776	0.303	0.006	0	Crsca02aG0119200	CC
0	6.88265455734856	0.284	0.005	0	Crsca17aG0247600	CC
0	6.55021602963895	0.271	0.004	0	Crsca09aG0142400	CC
0	6.68171918571463	0.271	0.005	0	Crsca09aG0149300	CC
1.97626258336499e-323	6.63024613051153	0.297	0.007	9.22321747656439e-319	Crsca06aG0130300	CC
2.11954162065895e-320	6.41507209477832	0.652	0.041	9.89190074361531e-316	Crsca14aG0073500	CC
7.96997648811123e-317	5.48985802823603	0.465	0.02	3.71958802700151e-312	Crsca02aG0296300	CC
3.5068628206835e-284	5.93530844845189	0.258	0.006	1.63665287841299e-279	Crsca04aG0332700	CC
6.31496779201451e-283	6.60042397912562	0.542	0.031	2.94719546853317e-278	Crsca03aG0266800	CC
7.62557847372645e-265	5.38006104006962	0.406	0.018	3.55885747368814e-260	Crsca03aG0237500	CC
6.42155477808665e-264	5.15895932610838	0.277	0.008	2.99693961493304e-259	Crsca03aG0236300	CC
5.12875071982853e-258	6.87133075810071	0.258	0.007	2.39358796094397e-253	Crsca09aG0172800	CC
4.6821572227394e-254	6.13705382642304	0.271	0.008	2.18516277585248e-249	Crsca06aG0242500	CC
6.55875404964278e-253	5.97533780288497	0.277	0.009	3.06097051496829e-248	Crsca16aG0142400	CC
2.41245802488911e-239	5.89084108733216	0.265	0.008	1.12589416021575e-234	Crsca15aG0002100	CC
8.50453395208563e-222	5.21874534874091	0.368	0.018	3.96906599543836e-217	Crsca10aG0243000	CC
3.2804070333568e-220	6.40329510973396	0.284	0.01	1.53096596246762e-215	Crsca07aG0214000	CC
2.55364101724963e-191	5.74142464643124	0.297	0.013	1.1917842627504e-186	Crsca02aG0010000	CC
5.79527740976439e-177	4.70466870638615	0.355	0.021	2.70465596713704e-172	Crsca17aG0191900	CC
1.91058726260891e-176	4.89691188758999	0.31	0.016	8.9167107545958e-172	Crsca17aG0193700	CC
2.00999861196028e-168	5.08434308685068	0.271	0.013	9.38066352201861e-164	Crsca02aG0210700	CC
6.50375924084368e-167	5.16816302960014	0.252	0.011	3.03530443770175e-162	Crsca02aG0246400	CC
1.50512780093512e-165	6.81753114412977	0.768	0.123	7.02443144696422e-161	Crsca07aG0218300	CC
6.77331755272024e-162	5.17966978305496	0.335	0.02	3.16110730185454e-157	Crsca06aG0213400	CC
1.51711830720217e-154	5.2158566193611	0.316	0.019	7.08039113971255e-150	Crsca14aG0066600	CC
2.03860415528709e-150	6.29032	0.587	0.071	9.51416559272486e-146	Crsca06aG0242600	CC
2.09777947350472e-127	6.62674889783745	0.871	0.215	9.79033680284653e-123	Crsca02aG0005700	CC
2.55863880027462e-85	4.25643421471585	0.31	0.032	1.19411672808817e-80	Crsca11aG0011400	CC
1.17841463035375e-63	3.50083656120958	0.348	0.051	5.49966107986094e-59	Crsca12aG0227000	CC
2.0081930751667e-61	3.63194930577582	0.252	0.028	9.37223708180299e-57	Crsca15aG0218100	CC
5.11898744567298e-53	3.00290113991408	0.355	0.061	2.38903144089558e-48	Crsca01aG0182600	CC
1.71759244202946e-49	3.11221126110753	0.355	0.065	8.01600392695148e-45	Crsca09aG0164600	CC
1.7923355768589e-45	3.00902133572837	0.265	0.04	8.36483013720048e-41	Crsca03aG0238200	CC
4.06355791036705e-45	3.44997046822348	0.445	0.114	1.8964624767683e-40	Crsca15aG0073200	CC
1.23016157934706e-44	3.28991378286377	0.329	0.063	5.74116409081275e-40	Crsca16aG0217100	CC
4.51027777451627e-44	3.05872653776467	0.426	0.1	2.10494663736674e-39	Crsca05aG0087800	CC
8.13412975407861e-40	3.31354048105309	0.284	0.052	3.79619835622849e-35	Crsca15aG0091800	CC
5.71895443361194e-38	2.37519907258382	0.335	0.07	2.66903603416669e-33	Crsca07aG0207700	CC
9.38672779204931e-38	2.69672216283727	0.529	0.178	4.38078586054941e-33	Crsca07aG0106700	CC
2.13625509578721e-36	2.40667311041117	0.529	0.173	9.96990253203892e-32	Crsca08aG0067800	CC
2.79218034316838e-36	3.35337133458343	0.252	0.044	1.30311056615668e-31	Crsca12aG0085400	CC
9.67396136708493e-36	3.28455876794993	0.284	0.057	4.51483777001853e-31	Crsca04aG0166900	CC
1.89738375837223e-35	2.6593671326587	0.303	0.063	8.85509000032318e-31	Crsca03aG0248400	CC
4.76628837364243e-31	2.28725776346151	0.252	0.049	2.22442678397892e-26	Crsca09aG0153700	CC
2.25490588486049e-30	2.92698712878084	0.265	0.055	1.05236457646439e-25	Crsca16aG0225100	CC
5.72040931306342e-30	2.92248161350095	0.284	0.064	2.6697150264067e-25	Crsca02aG0139900	CC
1.17027126271723e-29	1.6382158494214	0.523	0.174	5.46165598310132e-25	Crsca11aG0184300	CC
3.27305684717808e-26	2.21485598697784	0.277	0.066	1.52753563057801e-21	Crsca09aG0065100	CC
8.52404356393583e-26	1.43791316647773	0.49	0.167	3.97817113128885e-21	Crsca09aG0239900	CC
1.14620176103317e-25	2.71144936110193	0.355	0.106	5.3493236187418e-21	Crsca10aG0045300	CC
3.78018421054897e-24	2.24826208328627	0.277	0.071	1.7642119710632e-19	Crsca14aG0104300	CC
1.03963832030358e-23	2.46530270903547	0.271	0.07	4.85199204085679e-19	Crsca14aG0056100	CC
1.67138154941943e-23	2.28370234616918	0.252	0.061	7.80033769114048e-19	Crsca02aG0032300	CC
3.32363206376758e-22	0.884368776288121	0.8	0.429	1.55113908416033e-17	Crsca17aG0175900	CC
1.39146944782439e-21	1.77587290209722	0.555	0.251	6.49398791299645e-17	Crsca04aG0240000	CC
1.61118406862725e-21	1.93179445342648	0.361	0.12	7.51939604828339e-17	Crsca02aG0064100	CC
3.09175543262408e-21	2.83895933127563	0.406	0.15	1.44292226040566e-16	Crsca14aG0066300	CC
3.16463493338344e-20	2.3725082972831	0.665	0.357	1.47693512341005e-15	Crsca05aG0087900	CC
1.34897697684713e-19	2.04533861087453	0.258	0.072	6.29567555094556e-15	Crsca05aG0021800	CC
4.05178152924836e-19	2.07740404348354	0.277	0.081	1.89096643970021e-14	Crsca08aG0160500	CC
1.26171103549192e-18	2.18879996562979	0.31	0.102	5.8884054026408e-14	Crsca09aG0229300	CC
4.8558957483777e-18	1.91425903190552	0.29	0.092	2.26624654576787e-13	Crsca16aG0127000	CC
5.09638478361985e-18	1.36646976348905	0.316	0.101	2.37848277851539e-13	Crsca04aG0131400	CC
1.62732019072895e-16	1.79066228441361	0.271	0.087	7.594703330132e-12	Crsca12aG0193900	CC
1.80894905967334e-16	1.87683402398165	0.277	0.092	8.4423652614955e-12	Crsca13aG0226300	CC
3.2545233681542e-16	1.87248022791672	0.342	0.128	1.51888605591756e-11	Crsca05aG0130200	CC
5.96809512943937e-16	0.37565401124174	0.865	0.499	2.78530999690935e-11	Crsca12aG0024400	CC
5.99911057363377e-16	1.50683974393701	0.355	0.135	2.79978490471488e-11	Crsca06aG0081300	CC
1.02297102427164e-15	1.76744401449124	0.252	0.077	4.77420577027575e-11	Crsca07aG0191000	CC
1.17985332082647e-15	1.59951923654301	0.342	0.13	5.50637544829712e-11	Crsca09aG0042800	CC
2.53062331177547e-15	1.77415793719068	0.29	0.101	1.18104189960561e-10	Crsca10aG0028100	CC
3.31065786601187e-15	2.23824148048233	0.277	0.097	1.54508402606774e-10	Crsca07aG0255600	CC
4.97341759009513e-15	1.96094019597571	0.342	0.135	2.32109398929739e-10	Crsca05aG0117800	CC
5.57536036395806e-15	1.45165452150739	0.484	0.24	2.60202068185923e-10	Crsca04aG0226000	CC
8.91983917578846e-15	0.355532889620995	0.581	0.273	4.16288894334048e-10	Crsca09aG0270000	CC
2.18837175233157e-14	1.74621990904082	0.335	0.134	1.02131309681314e-09	Crsca11aG0011700	CC
6.39150856844389e-14	1.45894099361293	0.348	0.138	2.98291704889277e-09	Crsca06aG0231600	CC
7.20500414723565e-14	0.647599707931935	0.497	0.228	3.36257543551488e-09	Crsca04aG0324900	CC
1.36241227834393e-13	1.47094504740251	0.374	0.162	6.35837810303111e-09	Crsca01aG0091600	CC
1.72436193970879e-13	2.14808920494079	0.265	0.095	8.04759717262091e-09	Crsca13aG0131600	CC
2.29343402857602e-13	0.879624260153899	0.574	0.304	1.07034566113643e-08	Crsca05aG0150200	CC
3.3291744831626e-13	0.935766194471703	0.626	0.377	1.55372573129198e-08	Crsca01aG0244300	CC
3.23649060178792e-12	2.52450316763675	0.316	0.138	1.51047016385442e-07	Crsca08aG0176200	CC
3.31142441520854e-12	0.708132071199884	0.619	0.352	1.54544177457783e-07	Crsca13aG0119300	CC
3.89341901576386e-12	1.39392762202633	0.471	0.265	1.81705865465699e-07	Crsca12aG0236000	CC
4.93869209517336e-12	1.12632860454644	0.4	0.185	2.30488760081741e-07	Crsca09aG0258200	CC
1.11030815118807e-11	1.12230850622245	0.387	0.178	5.18180814159472e-07	Crsca01aG0135200	CC
1.24430622719605e-11	1.53764977123135	0.277	0.108	5.80717716232397e-07	Crsca14aG0051200	CC
1.31358405488826e-11	1.65425348105688	0.342	0.157	6.13049678416352e-07	Crsca11aG0257100	CC
2.60563013475339e-11	1.07410235573681	0.523	0.296	1.21604758388941e-06	Crsca07aG0093000	CC
3.10228552375877e-11	0.992849549329112	0.594	0.364	1.44783665393822e-06	Crsca11aG0145100	CC
3.68026636893413e-11	1.26792809212845	0.381	0.182	1.71758031438156e-06	Crsca05aG0032600	CC
4.83109857399801e-11	1.0612307645741	0.523	0.283	2.25467370448487e-06	Crsca13aG0240600	CC
6.75472350654954e-11	0.308638998348974	0.806	0.526	3.15242946050667e-06	Crsca11aG0259500	CC
[truncated: 1,091 more rows]

## Sheet: Supplemental Table S5
Supplemental Table S5. Gene Ontology enrichment results for upregulated DEGs across hawthorn leaf cell types
ONTOLOGY	ID	Description	GeneRatio	BgRatio	RichFactor	FoldEnrichment	zScore	pvalue	p.adjust	qvalue	geneID	Count	cell_type
BP	GO:0009644	response to high light intensity	11/246	221/35433	0.0497737556561086	7.16924180554023	7.6923112727094	4.79841571904295e-07	0.000373166892161582	0.000343121277659305	Crsca04aG0270600/Crsca14aG0038900/Crsca10aG0171700/Crsca12aG0163100/Crsca08aG0118300/Crsca13aG0160300/Crsca15aG0078600/Crsca06aG0081300/Crsca04aG0284500/Crsca12aG0009500/Crsca04aG0058100	11	XY
BP	GO:0006084	acetyl-CoA metabolic process	6/246	45/35433	0.133333333333333	19.2048780487805	10.2173974692194	6.8408229543828e-07	0.000373166892161582	0.000343121277659305	Crsca17aG0212900/Crsca09aG0064400/Crsca06aG0197000/Crsca04aG0069000/Crsca07aG0189000/Crsca06aG0147300	6	XY
BP	GO:0009642	response to light intensity	13/246	428/35433	0.0303738317757009	4.37494301344883	5.87350786024146	1.07912322356589e-05	0.00201179278303858	0.00184981284406943	Crsca11aG0259500/Crsca04aG0270600/Crsca14aG0038900/Crsca10aG0171700/Crsca12aG0163100/Crsca08aG0118300/Crsca13aG0160300/Crsca05aG0093600/Crsca15aG0078600/Crsca06aG0081300/Crsca04aG0284500/Crsca12aG0009500/Crsca04aG0058100	13	XY
BP	GO:0006972	hyperosmotic response	9/246	201/35433	0.0447761194029851	6.44939934473972	6.47816912542077	1.2539900801615e-05	0.00201179278303858	0.00184981284406943	Crsca04aG0270600/Crsca10aG0171700/Crsca07aG0138200/Crsca05aG0093600/Crsca01aG0036900/Crsca12aG0257800/Crsca14aG0199100/Crsca09aG0274800/Crsca02aG0013100	9	XY
BP	GO:0033865	nucleoside bisphosphate metabolic process	7/246	111/35433	0.0630630630630631	9.0833882663151	7.13192147158569	1.31265130362388e-05	0.00201179278303858	0.00184981284406943	Crsca17aG0212900/Crsca09aG0064400/Crsca13aG0160800/Crsca06aG0197000/Crsca04aG0069000/Crsca07aG0189000/Crsca06aG0147300	7	XY
BP	GO:0033875	ribonucleoside bisphosphate metabolic process	7/246	111/35433	0.0630630630630631	9.0833882663151	7.13192147158569	1.31265130362388e-05	0.00201179278303858	0.00184981284406943	Crsca17aG0212900/Crsca09aG0064400/Crsca13aG0160800/Crsca06aG0197000/Crsca04aG0069000/Crsca07aG0189000/Crsca06aG0147300	7	XY
BP	GO:0034032	purine nucleoside bisphosphate metabolic process	7/246	111/35433	0.0630630630630631	9.0833882663151	7.13192147158569	1.31265130362388e-05	0.00201179278303858	0.00184981284406943	Crsca17aG0212900/Crsca09aG0064400/Crsca13aG0160800/Crsca06aG0197000/Crsca04aG0069000/Crsca07aG0189000/Crsca06aG0147300	7	XY
BP	GO:0010193	response to ozone	7/246	113/35433	0.0619469026548673	8.92262033239801	7.05296916506976	1.47519177491371e-05	0.00201179278303858	0.00184981284406943	Crsca08aG0118300/Crsca13aG0160300/Crsca12aG0069800/Crsca14aG0088700/Crsca16aG0160000/Crsca12aG0087300/Crsca12aG0239400	7	XY
BP	GO:0006637	acyl-CoA metabolic process	6/246	83/35433	0.072289156626506	10.4122832794593	7.17816758518413	2.54403809342448e-05	0.00277554555992611	0.00255207189793004	Crsca17aG0212900/Crsca09aG0064400/Crsca06aG0197000/Crsca04aG0069000/Crsca07aG0189000/Crsca06aG0147300	6	XY
BP	GO:0035383	thioester metabolic process	6/246	83/35433	0.072289156626506	10.4122832794593	7.17816758518413	2.54403809342448e-05	0.00277554555992611	0.00255207189793004	Crsca17aG0212900/Crsca09aG0064400/Crsca06aG0197000/Crsca04aG0069000/Crsca07aG0189000/Crsca06aG0147300	6	XY
BP	GO:0016107	sesquiterpenoid catabolic process	4/246	28/35433	0.142857142857143	20.5766550522648	8.66481852767139	4.07180779030901e-05	0.00341718638402087	0.00314205086976881	Crsca13aG0121700/Crsca13aG0122100/Crsca13aG0122200/Crsca14aG0219100	4	XY
BP	GO:0043290	apocarotenoid catabolic process	4/246	28/35433	0.142857142857143	20.5766550522648	8.66481852767139	4.07180779030901e-05	0.00341718638402087	0.00314205086976881	Crsca13aG0121700/Crsca13aG0122100/Crsca13aG0122200/Crsca14aG0219100	4	XY
BP	GO:0046345	abscisic acid catabolic process	4/246	28/35433	0.142857142857143	20.5766550522648	8.66481852767139	4.07180779030901e-05	0.00341718638402087	0.00314205086976881	Crsca13aG0121700/Crsca13aG0122100/Crsca13aG0122200/Crsca14aG0219100	4	XY
BP	GO:0016125	sterol metabolic process	8/246	194/35433	0.0412371134020619	5.93965300477747	5.76845867866765	6.83316749029759e-05	0.00532498980851048	0.00489624708139369	Crsca04aG0002300/Crsca03aG0092400/Crsca17aG0212900/Crsca09aG0064400/Crsca14aG0219100/Crsca02aG0190400/Crsca03aG0171000/Crsca13aG0112100	8	XY
BP	GO:0042538	hyperosmotic salinity response	7/246	157/35433	0.0445859872611465	6.42201336026099	5.69305014718813	0.000120215110185159	0.00852740430329078	0.00784081846788182	Crsca04aG0270600/Crsca10aG0171700/Crsca07aG0138200/Crsca05aG0093600/Crsca01aG0036900/Crsca14aG0199100/Crsca09aG0274800	7	XY
BP	GO:0120256	olefinic compound catabolic process	4/246	37/35433	0.108108108108108	15.5715227422544	7.41486031475249	0.000125058174933687	0.00852740430329078	0.00784081846788182	Crsca13aG0121700/Crsca13aG0122100/Crsca13aG0122200/Crsca14aG0219100	4	XY
BP	GO:0045338	farnesyl diphosphate metabolic process	3/246	15/35433	0.2	28.8073170731707	9.00672636089898	0.000141412024213406	0.00907532461275449	0.00834462285296448	Crsca03aG0336200/Crsca03aG0092400/Crsca02aG0001400	3	XY
BP	GO:0051365	cellular response to potassium ion starvation	3/246	16/35433	0.1875	27.0068597560976	8.69994061146599	0.000173153773987745	0.0104950426344795	0.00965003196551587	Crsca16aG0098000/Crsca15aG0157300/Crsca14aG0085100	3	XY
BP	GO:0019287	isopentenyl diphosphate biosynthetic process, mevalonate pathway	3/246	17/35433	0.176470588235294	25.4182209469154	8.42001745865914	0.000209181163790467	0.0120114026155473	0.0110443018887709	Crsca17aG0212900/Crsca09aG0064400/Crsca04aG0069000	3	XY
BP	GO:0080086	stamen filament development	3/246	20/35433	0.15	21.605487804878	7.70709664710479	0.000345328256755296	0.0188376564060014	0.0173209383519893	Crsca08aG0118300/Crsca13aG0160300/Crsca06aG0274700	3	XY
BP	GO:0072329	monocarboxylic acid catabolic process	7/246	194/35433	0.0360824742268041	5.19719637918029	4.90142806714126	0.000437282891729842	0.0227178873751075	0.0208887516701022	Crsca13aG0121700/Crsca13aG0122100/Crsca13aG0122200/Crsca02aG0158000/Crsca14aG0219100/Crsca03aG0327800/Crsca13aG0112100	7	XY
BP	GO:0010286	heat acclimation	5/246	98/35433	0.0510204081632653	7.34880537580886	5.26231414414516	0.000622102450987644	0.03085062609216	0.0283666811383361	Crsca12aG0020300/Crsca12aG0071300/Crsca04aG0284500/Crsca11aG0048000/Crsca02aG0210200	5	XY
BP	GO:0006085	acetyl-CoA biosynthetic process	3/246	28/35433	0.107142857142857	15.4324912891986	6.38796145660423	0.000952518352881752	0.0390937682847058	0.0359461249219206	Crsca06aG0197000/Crsca07aG0189000/Crsca06aG0147300	3	XY
BP	GO:0033866	nucleoside bisphosphate biosynthetic process	4/246	63/35433	0.0634920634920635	9.1451800232288	5.41037912725529	0.000979493587667692	0.0390937682847058	0.0359461249219206	Crsca13aG0160800/Crsca06aG0197000/Crsca07aG0189000/Crsca06aG0147300	4	XY
BP	GO:0034030	ribonucleoside bisphosphate biosynthetic process	4/246	63/35433	0.0634920634920635	9.1451800232288	5.41037912725529	0.000979493587667692	0.0390937682847058	0.0359461249219206	Crsca13aG0160800/Crsca06aG0197000/Crsca07aG0189000/Crsca06aG0147300	4	XY
BP	GO:0034033	purine nucleoside bisphosphate biosynthetic process	4/246	63/35433	0.0634920634920635	9.1451800232288	5.41037912725529	0.000979493587667692	0.0390937682847058	0.0359461249219206	Crsca13aG0160800/Crsca06aG0197000/Crsca07aG0189000/Crsca06aG0147300	4	XY
BP	GO:0016115	terpenoid catabolic process	4/246	64/35433	0.0625	9.00228658536585	5.35755901785819	0.00103915607722866	0.0390937682847058	0.0359461249219206	Crsca13aG0121700/Crsca13aG0122100/Crsca13aG0122200/Crsca14aG0219100	4	XY
BP	GO:0018107	peptidyl-threonine phosphorylation	4/246	64/35433	0.0625	9.00228658536585	5.35755901785819	0.00103915607722866	0.0390937682847058	0.0359461249219206	Crsca16aG0098000/Crsca17aG0178200/Crsca09aG0274800/Crsca11aG0045800	4	XY
BP	GO:0018210	peptidyl-threonine modification	4/246	64/35433	0.0625	9.00228658536585	5.35755901785819	0.00103915607722866	0.0390937682847058	0.0359461249219206	Crsca16aG0098000/Crsca17aG0178200/Crsca09aG0274800/Crsca11aG0045800	4	XY
BP	GO:0008300	isoprenoid catabolic process	4/246	66/35433	0.0606060606060606	8.72949002217295	5.25530546076767	0.00116605509444763	0.041299339576079	0.0379741141550517	Crsca13aG0121700/Crsca13aG0122100/Crsca13aG0122200/Crsca14aG0219100	4	XY
BP	GO:0006694	steroid biosynthetic process	6/246	169/35433	0.0355029585798817	5.11372492423149	4.48215716255118	0.00121604834439818	0.041299339576079	0.0379741141550517	Crsca04aG0002300/Crsca03aG0092400/Crsca09aG0064400/Crsca14aG0219100/Crsca02aG0190400/Crsca03aG0171000	6	XY
BP	GO:0009404	toxin metabolic process	5/246	114/35433	0.043859649122807	6.31739409499358	4.75468053216458	0.00122956091883179	0.041299339576079	0.0379741141550517	Crsca09aG0077400/Crsca09aG0077500/Crsca05aG0102900/Crsca02aG0128300/Crsca11aG0048000	5	XY
BP	GO:0035384	thioester biosynthetic process	3/246	31/35433	0.0967741935483871	13.9390243902439	6.02618897052849	0.0012870554954965	0.041299339576079	0.0379741141550517	Crsca06aG0197000/Crsca07aG0189000/Crsca06aG0147300	3	XY
BP	GO:0071616	acyl-CoA biosynthetic process	3/246	31/35433	0.0967741935483871	13.9390243902439	6.02618897052849	0.0012870554954965	0.041299339576079	0.0379741141550517	Crsca06aG0197000/Crsca07aG0189000/Crsca06aG0147300	3	XY
BP	GO:0046164	alcohol catabolic process	4/246	70/35433	0.0571428571428571	8.23066202090592	5.06322000033936	0.00145172234359364	0.0452522593388762	0.0416087637126238	Crsca13aG0121700/Crsca13aG0122100/Crsca13aG0122200/Crsca14aG0219100	4	XY
BP	GO:0009853	photorespiration	4/246	71/35433	0.0563380281690141	8.11473720371007	5.01757524909907	0.00153010527872135	0.0463706905301387	0.0426371441702177	Crsca05aG0162700/Crsca07aG0182000/Crsca02aG0209300/Crsca06aG0191900	4	XY
BP	GO:0008202	steroid metabolic process	8/246	314/35433	0.0254777070063694	3.66972192014914	3.97314163900563	0.00167736807156503	0.0494596909750663	0.0454774330640534	Crsca04aG0002300/Crsca03aG0092400/Crsca17aG0212900/Crsca09aG0064400/Crsca14aG0219100/Crsca02aG0190400/Crsca03aG0171000/Crsca13aG0112100	8	XY
BP	GO:0002237	response to molecule of bacterial origin	5/246	124/35433	0.0403225806451613	5.80792682926829	4.48435772706468	0.00178328450376825	0.051199036673978	0.0470767349609735	Crsca04aG0301200/Crsca03aG0189900/Crsca10aG0198900/Crsca13aG0192300/Crsca12aG0009500	5	XY
BP	GO:0016126	sterol biosynthetic process	4/246	77/35433	0.051948051948052	7.48242001900539	4.76129657271436	0.00206319740703762	0.0577166248994371	0.0530695581351378	Crsca03aG0092400/Crsca09aG0064400/Crsca02aG0190400/Crsca03aG0171000	4	XY
BP	GO:0009240	isopentenyl diphosphate biosynthetic process	3/246	39/35433	0.0769230769230769	11.0797373358349	5.26612255651147	0.00251208479604987	0.0652543931545334	0.060000421319186	Crsca17aG0212900/Crsca09aG0064400/Crsca04aG0069000	3	XY
BP	GO:0010117	photoprotection	3/246	39/35433	0.0769230769230769	11.0797373358349	5.26612255651147	0.00251208479604987	0.0652543931545334	0.060000421319186	Crsca04aG0270600/Crsca10aG0171700/Crsca06aG0081300	3	XY
BP	GO:0046490	isopentenyl diphosphate metabolic process	3/246	39/35433	0.0769230769230769	11.0797373358349	5.26612255651147	0.00251208479604987	0.0652543931545334	0.060000421319186	Crsca17aG0212900/Crsca09aG0064400/Crsca04aG0069000	3	XY
BP	GO:0006633	fatty acid biosynthetic process	8/246	345/35433	0.0231884057971014	3.33997879109226	3.65187941046676	0.00299439047396474	0.0759739536533845	0.0698568940437797	Crsca04aG0334200/Crsca12aG0075600/Crsca09aG0246500/Crsca06aG0245400/Crsca06aG0197000/Crsca12aG0288800/Crsca02aG0158000/Crsca07aG0189000	8	XY
BP	GO:0006457	protein folding	7/246	285/35433	0.0245614035087719	3.53774069319641	3.59661235283716	0.003943597169558	0.0977832843633586	0.0899102416887266	Crsca16aG0205100/Crsca06aG0173000/Crsca12aG0029100/Crsca12aG0020300/Crsca07aG0163300/Crsca17aG0250300/Crsca11aG0163600	7	XY
BP	GO:0006986	response to unfolded protein	4/246	94/35433	0.0425531914893617	6.12921639854696	4.16353373217053	0.00424271325518649	0.102862225809077	0.0945802510454439	Crsca04aG0084800/Crsca04aG0284500/Crsca14aG0226000/Crsca12aG0009500	4	XY
BP	GO:0036293	response to decreased oxygen levels	7/246	292/35433	0.023972602739726	3.45293184096225	3.5192	0.00449649783518835	0.106645198656315	0.0980586370007894	Crsca04aG0284500/Crsca09aG0050200/Crsca07aG0182000/Crsca11aG0261200/Crsca06aG0191900/Crsca15aG0182600/Crsca10aG0065700	7	XY
BP	GO:0070482	response to oxygen levels	7/246	294/35433	0.0238095238095238	3.4294425087108	3.4975172013199	0.00466472297748818	0.107816502317744	0.099135632889971	Crsca04aG0284500/Crsca09aG0050200/Crsca07aG0182000/Crsca11aG0261200/Crsca06aG0191900/Crsca15aG0182600/Crsca10aG0065700	7	XY
BP	GO:0009695	jasmonic acid biosynthetic process	4/246	97/35433	0.0412371134020619	5.93965300477747	4.07331393411295	0.00474353080774677	0.107816502317744	0.099135632889971	Crsca04aG0334200/Crsca06aG0245400/Crsca12aG0288800/Crsca02aG0158000	4	XY
BP	GO:0035966	response to topologically incorrect protein	5/246	162/35433	0.0308641975308642	4.44557362240289	3.67522914207418	0.00560078698693722	0.124703236790786	0.11466272821807	Crsca13aG0222700/Crsca04aG0084800/Crsca04aG0284500/Crsca14aG0226000/Crsca12aG0009500	5	XY
BP	GO:0034051	negative regulation of plant-type hypersensitive response	2/246	17/35433	0.117647058823529	16.9454806312769	5.49840324542658	0.00609504277199509	0.130593931989331	0.120079132795439	Crsca07aG0160200/Crsca03aG0189900	2	XY
BP	GO:0009150	purine ribonucleotide metabolic process	8/246	389/35433	0.0205655526992288	2.96219198695843	3.25374661544579	0.00610475759070199	0.130593931989331	0.120079132795439	Crsca10aG0150000/Crsca17aG0212900/Crsca09aG0064400/Crsca13aG0160800/Crsca06aG0197000/Crsca04aG0069000/Crsca07aG0189000/Crsca06aG0147300	8	XY
BP	GO:0016054	organic acid catabolic process	7/246	314/35433	0.0222929936305732	3.2110066801305	3.29047105567285	0.00661929035238756	0.134316604545818	0.123502073551222	Crsca13aG0121700/Crsca13aG0122100/Crsca13aG0122200/Crsca02aG0158000/Crsca14aG0219100/Crsca03aG0327800/Crsca13aG0112100	7	XY
BP	GO:0046395	carboxylic acid catabolic process	7/246	314/35433	0.0222929936305732	3.2110066801305	3.29047105567285	0.00661929035238756	0.134316604545818	0.123502073551222	Crsca13aG0121700/Crsca13aG0122100/Crsca13aG0122200/Crsca02aG0158000/Crsca14aG0219100/Crsca03aG0327800/Crsca13aG0112100	7	XY
BP	GO:1901002	positive regulation of response to salt stress	3/246	55/35433	0.0545454545454545	7.85654101995565	4.25494598456318	0.00664811791519171	0.134316604545818	0.123502073551222	Crsca01aG0207200/Crsca13aG0236700/Crsca01aG0036900	3	XY
BP	GO:0034440	lipid oxidation	5/246	172/35433	0.0290697674418605	4.18711003970505	3.50338798479724	0.00717527292338556	0.13551586049614	0.124604771144601	Crsca08aG0118300/Crsca13aG0160300/Crsca12aG0288800/Crsca02aG0158000/Crsca13aG0112100	5	XY
BP	GO:0006749	glutathione metabolic process	4/246	110/35433	0.0363636363636364	5.23769401330377	3.72195753202257	0.00737181949741009	0.13551586049614	0.124604771144601	Crsca09aG0077400/Crsca17aG0127100/Crsca09aG0077500/Crsca02aG0128300	4	XY
BP	GO:0016042	lipid catabolic process	7/246	322/35433	0.0217391304347826	3.13123011664899	3.21226190784189	0.00755126471498804	0.13551586049614	0.124604771144601	Crsca13aG0121700/Crsca13aG0122100/Crsca13aG0122200/Crsca02aG0158000/Crsca14aG0219100/Crsca08aG0262700/Crsca13aG0112100	7	XY
BP	GO:0009687	abscisic acid metabolic process	4/246	111/35433	0.036036036036036	5.19050758075148	3.69725788337372	0.00760659341970384	0.13551586049614	0.124604771144601	Crsca13aG0121700/Crsca13aG0122100/Crsca13aG0122200/Crsca14aG0219100	4	XY
BP	GO:0042759	long-chain fatty acid biosynthetic process	4/246	111/35433	0.036036036036036	5.19050758075148	3.69725788337372	0.00760659341970384	0.13551586049614	0.124604771144601	Crsca04aG0334200/Crsca06aG0245400/Crsca12aG0288800/Crsca02aG0158000	4	XY
BP	GO:0043288	apocarotenoid metabolic process	4/246	111/35433	0.036036036036036	5.19050758075148	3.69725788337372	0.00760659341970384	0.13551586049614	0.124604771144601	Crsca13aG0121700/Crsca13aG0122100/Crsca13aG0122200/Crsca14aG0219100	4	XY
BP	GO:1902644	tertiary alcohol metabolic process	4/246	111/35433	0.036036036036036	5.19050758075148	3.69725788337372	0.00760659341970384	0.13551586049614	0.124604771144601	Crsca13aG0121700/Crsca13aG0122100/Crsca13aG0122200/Crsca14aG0219100	4	XY
BP	GO:0006555	methionine metabolic process	3/246	58/35433	0.0517241379310345	7.45016820857864	4.11065548128893	0.00770117630683839	0.13551586049614	0.124604771144601	Crsca07aG0093000/Crsca08aG0229800/Crsca07aG0146000	3	XY
BP	GO:0009694	jasmonic acid metabolic process	4/246	113/35433	0.0353982300884956	5.09864018994172	3.64874014726702	0.00809078647933595	0.139504657674541	0.128272409439758	Crsca04aG0334200/Crsca06aG0245400/Crsca12aG0288800/Crsca02aG0158000	4	XY
BP	GO:0018105	peptidyl-serine phosphorylation	6/246	250/35433	0.024	3.45687804878049	3.25957844290559	0.00827656727537189	0.139504657674541	0.128272409439758	Crsca15aG0065100/Crsca17aG0065200/Crsca16aG0098000/Crsca17aG0178200/Crsca09aG0274800/Crsca11aG0045800	6	XY
BP	GO:0048527	lateral root development	7/246	328/35433	0.0213414634146341	3.07395151695419	3.15518842093609	0.00831145989811656	0.139504657674541	0.128272409439758	Crsca07aG0064000/Crsca03aG0108900/Crsca10aG0034000/Crsca17aG0024800/Crsca14aG0190000/Crsca10aG0149900/Crsca12aG0239400	7	XY
BP	GO:0010102	lateral root morphogenesis	5/246	183/35433	0.0273224043715847	3.93542582966813	3.32882804962614	0.00923792230837084	0.150625849513703	0.13849817606885	Crsca07aG0064000/Crsca03aG0108900/Crsca10aG0034000/Crsca17aG0024800/Crsca12aG0239400	5	XY
BP	GO:0009407	toxin catabolic process	3/246	62/35433	0.0483870967741935	6.96951219512195	3.93355553527962	0.00925016674373796	0.150625849513703	0.13849817606885	Crsca09aG0077400/Crsca09aG0077500/Crsca02aG0128300	3	XY
BP	GO:0018209	peptidyl-serine modification	6/246	257/35433	0.0233463035019455	3.3627218373351	3.17855841556425	0.00940452691234456	0.150887336196587	0.138738609093876	Crsca15aG0065100/Crsca17aG0065200/Crsca16aG0098000/Crsca17aG0178200/Crsca09aG0274800/Crsca11aG0045800	6	XY
BP	GO:0001666	response to hypoxia	6/246	259/35433	0.0231660231660232	3.33675487334024	3.1559232012204	0.0097460016817431	0.154099823692489	0.141692442451582	Crsca04aG0284500/Crsca09aG0050200/Crsca07aG0182000/Crsca06aG0191900/Crsca15aG0182600/Crsca10aG0065700	6	XY
BP	GO:0010101	post-embryonic root morphogenesis	5/246	187/35433	0.0267379679144385	3.85124559801748	3.26869786448764	0.0100797181841781	0.157099607699118	0.144450698188296	Crsca07aG0064000/Crsca03aG0108900/Crsca10aG0034000/Crsca17aG0024800/Crsca12aG0239400	5	XY
BP	GO:0009900	dehiscence	3/246	65/35433	0.0461538461538462	6.64784240150094	3.81073074277609	0.0105226906011122	0.159447992302964	0.146610002088595	Crsca08aG0118300/Crsca13aG0160300/Crsca14aG0098500	3	XY
BP	GO:0010959	regulation of metal ion transport	3/246	65/35433	0.0461538461538462	6.64784240150094	3.81073074277609	0.0105226906011122	0.159447992302964	0.146610002088595	Crsca16aG0098000/Crsca14aG0098500/Crsca02aG0013100	3	XY
BP	GO:0035967	cellular response to topologically incorrect protein	4/246	124/35433	0.032258064516129	4.64634146341463	3.40094599972693	0.0111157885376928	0.166127743761957	0.152751931887834	Crsca13aG0222700/Crsca04aG0284500/Crsca14aG0226000/Crsca12aG0009500	4	XY
BP	GO:0034620	cellular response to unfolded protein	3/246	67/35433	0.0447761194029851	6.44939934473972	3.73308030051382	0.0114245653249916	0.168435145534673	0.154873552698676	Crsca04aG0284500/Crsca14aG0226000/Crsca12aG0009500	3	XY
BP	GO:0006714	sesquiterpenoid metabolic process	4/246	130/35433	0.0307692307692308	4.43189493433396	3.27773712518183	0.0130355607176753	0.189623956573117	0.174356341950099	Crsca13aG0121700/Crsca13aG0122100/Crsca13aG0122200/Crsca14aG0219100	4	XY
BP	GO:0009259	ribonucleotide metabolic process	8/246	450/35433	0.0177777777777778	2.56065040650406	2.78584935591728	0.013864699316705	0.199031407296384	0.183006349706647	Crsca10aG0150000/Crsca17aG0212900/Crsca09aG0064400/Crsca13aG0160800/Crsca06aG0197000/Crsca04aG0069000/Crsca07aG0189000/Crsca06aG0147300	8	XY
BP	GO:0044272	sulfur compound biosynthetic process	6/246	283/35433	0.0212014134275618	3.05377919503577	2.90040449737836	0.0145584052659157	0.206275586300182	0.18966726204262	Crsca05aG0102900/Crsca06aG0197000/Crsca08aG0229800/Crsca07aG0189000/Crsca11aG0048000/Crsca06aG0147300	6	XY
BP	GO:0006722	triterpenoid metabolic process	3/246	76/35433	0.0394736842105263	5.68565468549422	3.41911444812633	0.0160220891834629	0.211807019627037	0.194753330797015	Crsca04aG0002300/Crsca02aG0190400/Crsca03aG0171000	3	XY
BP	GO:0015752	D-ribose transmembrane transport	2/246	28/35433	0.0714285714285714	10.2883275261324	4.11110438553707	0.0161136412731843	0.211807019627037	0.194753330797015	Crsca03aG0108900/Crsca17aG0024800	2	XY
BP	GO:0015753	D-xylose transmembrane transport	2/246	28/35433	0.0714285714285714	10.2883275261324	4.11110438553707	0.0161136412731843	0.211807019627037	0.194753330797015	Crsca03aG0108900/Crsca17aG0024800	2	XY
BP	GO:0015795	sorbitol transmembrane transport	2/246	28/35433	0.0714285714285714	10.2883275261324	4.11110438553707	0.0161136412731843	0.211807019627037	0.194753330797015	Crsca03aG0108900/Crsca17aG0024800	2	XY
BP	GO:0015797	mannitol transmembrane transport	2/246	28/35433	0.0714285714285714	10.2883275261324	4.11110438553707	0.0161136412731843	0.211807019627037	0.194753330797015	Crsca03aG0108900/Crsca17aG0024800	2	XY
BP	GO:0046209	nitric oxide metabolic process	2/246	28/35433	0.0714285714285714	10.2883275261324	4.11110438553707	0.0161136412731843	0.211807019627037	0.194753330797015	Crsca08aG0026100/Crsca12aG0239400	2	XY
BP	GO:0034605	cellular response to heat	4/246	141/35433	0.0283687943262411	4.08614426569798	3.07016637973253	0.0170774167466715	0.218567232358078	0.200969243511263	Crsca14aG0038900/Crsca04aG0084800/Crsca04aG0284500/Crsca11aG0048000	4	XY
BP	GO:0042542	response to hydrogen peroxide	5/246	214/35433	0.0233644859813084	3.36534077957602	2.9019261922978	0.0171675742955241	0.218567232358078	0.200969243511263	Crsca11aG0259500/Crsca14aG0038900/Crsca10aG0034000/Crsca04aG0284500/Crsca12aG0192700	5	XY
BP	GO:0016104	triterpenoid biosynthetic process	2/246	29/35433	0.0689655172413793	9.93355761143818	4.02412573633463	0.0172289477385836	0.218567232358078	0.200969243511263	Crsca02aG0190400/Crsca03aG0171000	2	XY
BP	GO:0015798	myo-inositol transport	2/246	30/35433	0.0666666666666667	9.60243902439024	3.94127251255368	0.018376125503384	0.230347276387833	0.211800814701727	Crsca03aG0108900/Crsca17aG0024800	2	XY
BP	GO:0098754	detoxification	7/246	385/35433	0.0181818181818182	2.61884700665188	2.67041536339974	0.0185797986453981	0.230347276387833	0.211800814701727	Crsca09aG0077400/Crsca14aG0140200/Crsca03aG0056900/Crsca09aG0077500/Crsca15aG0017000/Crsca01aG0103400/Crsca02aG0128300	7	XY
BP	GO:0015793	glycerol transmembrane transport	2/246	31/35433	0.0645161290322581	9.29268292682927	3.86221347781279	0.0195546820556521	0.237659524865559	0.218524315882945	Crsca03aG0108900/Crsca17aG0024800	2	XY
BP	GO:0019693	ribose phosphate metabolic process	8/246	480/35433	0.0166666666666667	2.40060975609756	2.58327002139748	0.0196052770283229	0.237659524865559	0.218524315882945	Crsca10aG0150000/Crsca17aG0212900/Crsca09aG0064400/Crsca13aG0160800/Crsca06aG0197000/Crsca04aG0069000/Crsca07aG0189000/Crsca06aG0147300	8	XY
BP	GO:0010363	regulation of plant-type hypersensitive response	2/246	32/35433	0.0625	9.00228658536585	3.78665371743821	0.0207641301369318	0.245272783168113	0.225524591016655	Crsca07aG0160200/Crsca03aG0189900	2	XY
BP	GO:0015750	pentose transmembrane transport	2/246	32/35433	0.0625	9.00228658536585	3.78665371743821	0.0207641301369318	0.245272783168113	0.225524591016655	Crsca03aG0108900/Crsca17aG0024800	2	XY
BP	GO:0010311	lateral root formation	4/246	150/35433	0.0266666666666667	3.8409756097561	2.91544363234208	0.020907762451544	0.245272783168113	0.225524591016655	Crsca07aG0064000/Crsca03aG0108900/Crsca10aG0034000/Crsca17aG0024800	4	XY
BP	GO:0007269	neurotransmitter secretion	2/246	33/35433	0.0606060606060606	8.72949002217295	3.71432966181203	0.0220039876935286	0.250066151808746	0.229932020525578	Crsca05aG0098500/Crsca12aG0151800	2	XY
BP	GO:0015757	galactose transmembrane transport	2/246	33/35433	0.0606060606060606	8.72949002217295	3.71432966181203	0.0220039876935286	0.250066151808746	0.229932020525578	Crsca03aG0108900/Crsca17aG0024800	2	XY
BP	GO:0099643	signal release from synapse	2/246	33/35433	0.0606060606060606	8.72949002217295	3.71432966181203	0.0220039876935286	0.250066151808746	0.229932020525578	Crsca05aG0098500/Crsca12aG0151800	2	XY
BP	GO:0006163	purine nucleotide metabolic process	8/246	493/35433	0.0162271805273834	2.33730767327957	2.50015890566416	0.0225558966192677	0.253695703212589	0.23326933779883	Crsca10aG0150000/Crsca17aG0212900/Crsca09aG0064400/Crsca13aG0160800/Crsca06aG0197000/Crsca04aG0069000/Crsca07aG0189000/Crsca06aG0147300	8	XY
BP	GO:0043266	regulation of potassium ion transport	2/246	35/35433	0.0571428571428571	8.23066202090592	3.57846676787117	0.0245730287523399	0.273563003763294	0.251537018270461	Crsca16aG0098000/Crsca14aG0098500	2	XY
BP	GO:0009901	anther dehiscence	2/246	36/35433	0.0555555555555556	8.0020325203252	3.51452318466559	0.025901273738378	0.277042055378141	0.254735953278372	Crsca08aG0118300/Crsca13aG0160300	2	XY
BP	GO:0010120	camalexin biosynthetic process	2/246	36/35433	0.0555555555555556	8.0020325203252	3.51452318466559	0.025901273738378	0.277042055378141	0.254735953278372	Crsca05aG0102900/Crsca11aG0048000	2	XY
BP	GO:0035264	multicellular organism growth	2/246	36/35433	0.0555555555555556	8.0020325203252	3.51452318466559	0.025901273738378	0.277042055378141	0.254735953278372	Crsca04aG0270600/Crsca10aG0171700	2	XY
BP	GO:0052317	camalexin metabolic process	2/246	36/35433	0.0555555555555556	8.0020325203252	3.51452318466559	0.025901273738378	0.277042055378141	0.254735953278372	Crsca05aG0102900/Crsca11aG0048000	2	XY
BP	GO:0015791	polyol transmembrane transport	2/246	37/35433	0.0540540540540541	7.78576137112722	3.45300032029234	0.0272580510728503	0.288723628354171	0.265476981833687	Crsca03aG0108900/Crsca17aG0024800	2	XY
BP	GO:0048528	post-embryonic root development	7/246	419/35433	0.0167064439140811	2.40633913499039	2.42131045208492	0.0278022497585152	0.289273293081894	0.265982390184809	Crsca07aG0064000/Crsca03aG0108900/Crsca10aG0034000/Crsca17aG0024800/Crsca14aG0190000/Crsca10aG0149900/Crsca12aG0239400	7	XY
BP	GO:0043094	metabolic compound salvage	4/246	164/35433	0.024390243902439	3.51308744794765	2.69716315739173	0.0278402344395957	0.289273293081894	0.265982390184809	Crsca05aG0162700/Crsca07aG0182000/Crsca02aG0209300/Crsca06aG0191900	4	XY
BP	GO:0009152	purine ribonucleotide biosynthetic process	5/246	248/35433	0.0201612903225806	2.90396341463415	2.51582210344774	0.0299833093189442	0.308601796858189	0.283754655222977	Crsca10aG0150000/Crsca13aG0160800/Crsca06aG0197000/Crsca07aG0189000/Crsca06aG0147300	5	XY
BP	GO:0010150	leaf senescence	7/246	427/35433	0.0163934426229508	2.36125549780088	2.36622809599919	0.0303554072866389	0.309511676165636	0.284591275397608	Crsca11aG0259500/Crsca01aG0207200/Crsca12aG0069800/Crsca09aG0108000/Crsca13aG0160800/Crsca16aG0160000/Crsca14aG0098500	7	XY
BP	GO:0044282	small molecule catabolic process	7/246	430/35433	0.0162790697674419	2.34478162223483	2.34588990237373	0.0313522495093236	0.312373476219633	0.287222656990024	Crsca13aG0121700/Crsca13aG0122100/Crsca13aG0122200/Crsca02aG0158000/Crsca14aG0219100/Crsca03aG0327800/Crsca13aG0112100	7	XY
BP	GO:1900057	positive regulation of leaf senescence	2/246	40/35433	0.05	7.20182926829268	3.28144689715463	0.0314950342659575	0.312373476219633	0.287222656990024	Crsca01aG0207200/Crsca09aG0108000	2	XY
BP	GO:1905623	positive regulation of leaf development	2/246	40/35433	0.05	7.20182926829268	3.28144689715463	0.0314950342659575	0.312373476219633	0.287222656990024	Crsca01aG0207200/Crsca09aG0108000	2	XY
BP	GO:0009066	aspartate family amino acid metabolic process	3/246	100/35433	0.03	4.32109756097561	2.78077367656843	0.0326790957292075	0.321197238203292	0.295335971834374	Crsca07aG0093000/Crsca08aG0229800/Crsca07aG0146000	3	XY
BP	GO:1901000	regulation of response to salt stress	3/246	101/35433	0.0297029702970297	4.27831441680753	2.75868076193516	0.0335119956329035	0.325409476222868	0.299209060582173	Crsca01aG0207200/Crsca13aG0236700/Crsca01aG0036900	3	XY
BP	GO:0006614	SRP-dependent cotranslational protein targeting to membrane	2/246	42/35433	0.0476190476190476	6.8588850174216	3.17663611993065	0.0344541081388647	0.325409476222868	0.299209060582173	Crsca06aG0164400/Crsca02aG0230400	2	XY
BP	GO:0009700	indole phytoalexin biosynthetic process	2/246	42/35433	0.0476190476190476	6.8588850174216	3.17663611993065	0.0344541081388647	0.325409476222868	0.299209060582173	Crsca05aG0102900/Crsca11aG0048000	2	XY
BP	GO:0046217	indole phytoalexin metabolic process	2/246	42/35433	0.0476190476190476	6.8588850174216	3.17663611993065	0.0344541081388647	0.325409476222868	0.299209060582173	Crsca05aG0102900/Crsca11aG0048000	2	XY
BP	GO:0090693	plant organ senescence	7/246	443/35433	0.0158013544018059	2.27597313219182	2.25967347767106	0.0359255380766865	0.325409476222868	0.299209060582173	Crsca11aG0259500/Crsca01aG0207200/Crsca12aG0069800/Crsca09aG0108000/Crsca13aG0160800/Crsca16aG0160000/Crsca14aG0098500	7	XY
BP	GO:0007268	chemical synaptic transmission	2/246	43/35433	0.0465116279069767	6.69937606352808	3.12676705400747	0.035972658539729	0.325409476222868	0.299209060582173	Crsca05aG0098500/Crsca12aG0151800	2	XY
BP	GO:0098916	anterograde trans-synaptic signaling	2/246	43/35433	0.0465116279069767	6.69937606352808	3.12676705400747	0.035972658539729	0.325409476222868	0.299209060582173	Crsca05aG0098500/Crsca12aG0151800	2	XY
BP	GO:0099536	synaptic signaling	2/246	43/35433	0.0465116279069767	6.69937606352808	3.12676705400747	0.035972658539729	0.325409476222868	0.299209060582173	Crsca05aG0098500/Crsca12aG0151800	2	XY
BP	GO:0099537	trans-synaptic signaling	2/246	43/35433	0.0465116279069767	6.69937606352808	3.12676705400747	0.035972658539729	0.325409476222868	0.299209060582173	Crsca05aG0098500/Crsca12aG0151800	2	XY
BP	GO:1900055	regulation of leaf senescence	3/246	105/35433	0.0285714285714286	4.11533101045296	2.67309004488463	0.0369531635974252	0.325409476222868	0.299209060582173	Crsca11aG0259500/Crsca01aG0207200/Crsca09aG0108000	3	XY
BP	GO:0006613	cotranslational protein targeting to membrane	2/246	44/35433	0.0454545454545455	6.54711751662971	3.07846220562746	0.0375166458193731	0.325409476222868	0.299209060582173	Crsca06aG0164400/Crsca02aG0230400	2	XY
BP	GO:0009268	response to pH	2/246	44/35433	0.0454545454545455	6.54711751662971	3.07846220562746	0.0375166458193731	0.325409476222868	0.299209060582173	Crsca09aG0206400/Crsca11aG0045800	2	XY
BP	GO:2001057	reactive nitrogen species metabolic process	2/246	44/35433	0.0454545454545455	6.54711751662971	3.07846220562746	0.0375166458193731	0.325409476222868	0.299209060582173	Crsca08aG0026100/Crsca12aG0239400	2	XY
BP	GO:0120254	olefinic compound metabolic process	5/246	264/35433	0.0189393939393939	2.72796563192905	2.35630400095842	0.0376586206012332	0.325409476222868	0.299209060582173	Crsca13aG0099000/Crsca13aG0121700/Crsca13aG0122100/Crsca13aG0122200/Crsca14aG0219100	5	XY
BP	GO:0008299	isoprenoid biosynthetic process	7/246	448/35433	0.015625	2.25057164634146	2.22731125917447	0.0377960835018019	0.325409476222868	0.299209060582173	Crsca03aG0336200/Crsca17aG0212900/Crsca09aG0064400/Crsca04aG0069000/Crsca02aG0190400/Crsca03aG0171000/Crsca02aG0001400	7	XY
BP	GO:0002833	positive regulation of response to biotic stimulus	6/246	354/35433	0.0169491525423729	2.44129805704837	2.27879940127386	0.0378799298627903	0.325409476222868	0.299209060582173	Crsca03aG0189900/Crsca13aG0236700/Crsca17aG0250300/Crsca11aG0216700/Crsca06aG0229000/Crsca04aG0057800	6	XY
BP	GO:0032103	positive regulation of response to external stimulus	6/246	364/35433	0.0164835164835165	2.37422942910748	2.20354798473192	0.0423980903067238	0.360067162485376	0.331076275602839	Crsca03aG0189900/Crsca13aG0236700/Crsca17aG0250300/Crsca11aG0216700/Crsca06aG0229000/Crsca04aG0057800	6	XY
BP	GO:0001676	long-chain fatty acid metabolic process	4/246	188/35433	0.0212765957446809	3.06460819927348	2.37324230619069	0.0425743940977209	0.360067162485376	0.331076275602839	Crsca04aG0334200/Crsca06aG0245400/Crsca12aG0288800/Crsca02aG0158000	4	XY
BP	GO:0010229	inflorescence development	3/246	112/35433	0.0267857142857143	3.85812282229965	2.53307279402924	0.0433926527959545	0.364164493849126	0.334843709429512	Crsca12aG0020300/Crsca05aG0102900/Crsca10aG0149900	3	XY
BP	GO:0030968	endoplasmic reticulum unfolded protein response	2/246	48/35433	0.0416666666666667	6.0015243902439	2.89926342220819	0.0439385676466445	0.36480349778358	0.33543126382146	Crsca14aG0226000/Crsca12aG0009500	2	XY
BP	GO:0006164	purine nucleotide biosynthetic process	5/246	276/35433	0.0181159420289855	2.60935843054083	2.24427298941609	0.0441375451030546	0.36480349778358	0.33543126382146	Crsca10aG0150000/Crsca13aG0160800/Crsca06aG0197000/Crsca07aG0189000/Crsca06aG0147300	5	XY
BP	GO:0045089	positive regulation of innate immune response	5/246	277/35433	0.0180505415162455	2.59993836400458	2.23520662270696	0.0447057611930157	0.36672169519985	0.337195017150328	Crsca03aG0189900/Crsca13aG0236700/Crsca17aG0250300/Crsca11aG0216700/Crsca04aG0057800	5	XY
BP	GO:0042594	response to starvation	7/246	468/35433	0.014957264957265	2.15439337085679	2.10200745069505	0.0459145352745355	0.373826552123271	0.343727824953907	Crsca02aG0014900/Crsca11aG0263700/Crsca13aG0091900/Crsca16aG0098000/Crsca13aG0160800/Crsca15aG0157300/Crsca14aG0085100	7	XY
BP	GO:0009864	induced systemic resistance, jasmonic acid mediated signaling pathway	2/246	50/35433	0.04	5.76146341463415	2.81710084798637	0.0472913622816728	0.376604936126314	0.346282506757082	Crsca11aG0216700/Crsca04aG0057800	2	XY
BP	GO:0052314	phytoalexin metabolic process	2/246	50/35433	0.04	5.76146341463415	2.81710084798637	0.0472913622816728	0.376604936126314	0.346282506757082	Crsca05aG0102900/Crsca11aG0048000	2	XY
BP	GO:0052315	phytoalexin biosynthetic process	2/246	50/35433	0.04	5.76146341463415	2.81710084798637	0.0472913622816728	0.376604936126314	0.346282506757082	Crsca05aG0102900/Crsca11aG0048000	2	XY
BP	GO:0000096	sulfur amino acid metabolic process	3/246	117/35433	0.0256410256410256	3.69324577861163	2.43981800145685	0.0483121907643234	0.381946377709252	0.351193880994662	Crsca07aG0093000/Crsca08aG0229800/Crsca07aG0146000	3	XY
BP	GO:0002238	response to molecule of fungal origin	2/246	52/35433	0.0384615384615385	5.53986866791745	2.73926580575997	0.0507344389744717	0.395366235151061	0.363533235659184	Crsca12aG0069800/Crsca16aG0160000	2	XY
BP	GO:0009403	toxin biosynthetic process	2/246	52/35433	0.0384615384615385	5.53986866791745	2.73926580575997	0.0507344389744717	0.395366235151061	0.363533235659184	Crsca05aG0102900/Crsca11aG0048000	2	XY
BP	GO:0055088	lipid homeostasis	4/246	200/35433	0.02	2.88073170731707	2.23018709796141	0.0513092459415086	0.397009839164439	0.365044504533465	Crsca04aG0002300/Crsca04aG0321500/Crsca11aG0065700/Crsca14aG0219100	4	XY
BP	GO:0006066	alcohol metabolic process	6/246	387/35433	0.0155038759689922	2.23312535450936	2.03947200512063	0.0540330668439644	0.415141379765952	0.381716180150467	Crsca13aG0121700/Crsca13aG0122100/Crsca13aG0122200/Crsca13aG0091900/Crsca09aG0064400/Crsca14aG0219100	6	XY
BP	GO:0002218	activation of innate immune response	4/246	208/35433	0.0192307692307692	2.76993433395872	2.14061018395261	0.0576365511750658	0.438077237971875	0.40280535268194	Crsca03aG0189900/Crsca17aG0250300/Crsca11aG0216700/Crsca04aG0057800	4	XY
BP	GO:0047484	regulation of response to osmotic stress	3/246	126/35433	0.0238095238095238	3.4294425087108	2.28420857031015	0.0578213769642072	0.438077237971875	0.40280535268194	Crsca01aG0207200/Crsca13aG0236700/Crsca01aG0036900	3	XY
BP	GO:0072522	purine-containing compound biosynthetic process	5/246	299/35433	0.0167224080267559	2.40863855126846	2.04524637811928	0.0583165682811766	0.438781903412163	0.40345328182912	Crsca10aG0150000/Crsca13aG0160800/Crsca06aG0197000/Crsca07aG0189000/Crsca06aG0147300	5	XY
BP	GO:0051865	protein autoubiquitination	3/246	127/35433	0.0236220472440945	3.40243902439024	2.26779734496496	0.0589287208412638	0.440350920806978	0.404895969442858	Crsca09aG0006000/Crsca14aG0097000/Crsca05aG0079600	3	XY
BP	GO:0015979	photosynthesis	6/246	397/35433	0.0151133501259446	2.17687534557965	1.97170857919278	0.0596401445217428	0.442635358321234	0.406996474967568	Crsca04aG0270600/Crsca10aG0171700/Crsca06aG0081300/Crsca13aG0160800/Crsca01aG0291400/Crsca10aG0015600	6	XY
BP	GO:0006575	modified amino acid metabolic process	4/246	212/35433	0.0188679245283019	2.71767142199724	2.09740088079243	0.0609499813986418	0.445855460391904	0.409957309810878	Crsca09aG0077400/Crsca17aG0127100/Crsca09aG0077500/Crsca02aG0128300	4	XY
BP	GO:1902652	secondary alcohol metabolic process	2/246	59/35433	0.0338983050847458	4.88259611409673	2.49563117605781	0.0634517777041807	0.445855460391904	0.409957309810878	Crsca13aG0091900/Crsca09aG0064400	2	XY
BP	GO:0009260	ribonucleotide biosynthetic process	5/246	307/35433	0.0162866449511401	2.34587272582824	1.98030962430616	0.0637930743034866	0.445855460391904	0.409957309810878	Crsca10aG0150000/Crsca13aG0160800/Crsca06aG0197000/Crsca07aG0189000/Crsca06aG0147300	5	XY
BP	GO:0046390	ribose phosphate biosynthetic process	5/246	307/35433	0.0162866449511401	2.34587272582824	1.98030962430616	0.0637930743034866	0.445855460391904	0.409957309810878	Crsca10aG0150000/Crsca13aG0160800/Crsca06aG0197000/Crsca07aG0189000/Crsca06aG0147300	5	XY
BP	GO:0010087	phloem or xylem histogenesis	5/246	309/35433	0.0161812297734628	2.33068908358986	1.96439181676519	0.0652059957397516	0.445855460391904	0.409957309810878	Crsca06aG0274700/Crsca12aG0054500/Crsca16aG0175100/Crsca04aG0057800/Crsca04aG0058100	5	XY
BP	GO:0023061	signal release	2/246	60/35433	0.0333333333333333	4.80121951219512	2.46397839081307	0.0653482266552881	0.445855460391904	0.409957309810878	Crsca05aG0098500/Crsca12aG0151800	2	XY
BP	GO:0045824	negative regulation of innate immune response	2/246	60/35433	0.0333333333333333	4.80121951219512	2.46397839081307	0.0653482266552881	0.445855460391904	0.409957309810878	Crsca07aG0160200/Crsca03aG0189900	2	XY
BP	GO:0009961	response to 1-aminocyclopropane-1-carboxylic acid	1/246	10/35433	0.1	14.4036585365854	3.54449977080239	0.0673057249995369	0.445855460391904	0.409957309810878	Crsca02aG0030500	1	XY
BP	GO:0010111	glyoxysome organization	1/246	10/35433	0.1	14.4036585365854	3.54449977080239	0.0673057249995369	0.445855460391904	0.409957309810878	Crsca02aG0158000	1	XY
BP	GO:0016134	saponin metabolic process	1/246	10/35433	0.1	14.4036585365854	3.54449977080239	0.0673057249995369	0.445855460391904	0.409957309810878	Crsca04aG0002300	1	XY
BP	GO:0016135	saponin biosynthetic process	1/246	10/35433	0.1	14.4036585365854	3.54449977080239	0.0673057249995369	0.445855460391904	0.409957309810878	Crsca04aG0002300	1	XY
BP	GO:0055090	acylglycerol homeostasis	1/246	10/35433	0.1	14.4036585365854	3.54449977080239	0.0673057249995369	0.445855460391904	0.409957309810878	Crsca04aG0321500	1	XY
BP	GO:0070328	triglyceride homeostasis	1/246	10/35433	0.1	14.4036585365854	3.54449977080239	0.0673057249995369	0.445855460391904	0.409957309810878	Crsca04aG0321500	1	XY
BP	GO:0071467	cellular response to pH	1/246	10/35433	0.1	14.4036585365854	3.54449977080239	0.0673057249995369	0.445855460391904	0.409957309810878	Crsca09aG0206400	1	XY
BP	GO:0080169	cellular response to boron-containing substance deprivation	1/246	10/35433	0.1	14.4036585365854	3.54449977080239	0.0673057249995369	0.445855460391904	0.409957309810878	Crsca02aG0014900	1	XY
BP	GO:0090156	intracellular sphingolipid homeostasis	1/246	10/35433	0.1	14.4036585365854	3.54449977080239	0.0673057249995369	0.445855460391904	0.409957309810878	Crsca11aG0065700	1	XY
BP	GO:1901381	positive regulation of potassium ion transmembrane transport	1/246	10/35433	0.1	14.4036585365854	3.54449977080239	0.0673057249995369	0.445855460391904	0.409957309810878	Crsca14aG0098500	1	XY
BP	GO:0045088	regulation of innate immune response	6/246	410/35433	0.0146341463414634	2.10785246876859	1.88656360890265	0.0674300192160075	0.445855460391904	0.409957309810878	Crsca07aG0160200/Crsca03aG0189900/Crsca13aG0236700/Crsca17aG0250300/Crsca11aG0216700/Crsca04aG0057800	6	XY
BP	GO:0042435	indole-containing compound biosynthetic process	3/246	138/35433	0.0217391304347826	3.13123011664899	2.09743041460356	0.071756161681033	0.462627586230387	0.42537902424387	Crsca05aG0102900/Crsca11aG0048000/Crsca08aG0208100	3	XY
BP	GO:0000956	nuclear-transcribed mRNA catabolic process	4/246	225/35433	0.0177777777777778	2.56065040650406	1.96358849028532	0.0723978623210788	0.462627586230387	0.42537902424387	Crsca10aG0197800/Crsca11aG0133300/Crsca06aG0164400/Crsca02aG0230400	4	XY
BP	GO:0002253	activation of immune response	4/246	225/35433	0.0177777777777778	2.56065040650406	1.96358849028532	0.0723978623210788	0.462627586230387	0.42537902424387	Crsca03aG0189900/Crsca17aG0250300/Crsca11aG0216700/Crsca04aG0057800	4	XY
BP	GO:0050778	positive regulation of immune response	5/246	319/35433	0.0156739811912226	2.25762672987231	1.8866060169496	0.0725320248949487	0.462627586230387	0.42537902424387	Crsca03aG0189900/Crsca13aG0236700/Crsca17aG0250300/Crsca11aG0216700/Crsca04aG0057800	5	XY
BP	GO:0080022	primary root development	2/246	64/35433	0.03125	4.50114329268293	2.34402775012207	0.0731189361117763	0.462627586230387	0.42537902424387	Crsca10aG0034000/Crsca08aG0170600	2	XY
BP	GO:0006023	aminoglycan biosynthetic process	1/246	11/35433	0.0909090909090909	13.0942350332594	3.35438165391245	0.0737829514244613	0.462627586230387	0.42537902424387	Crsca07aG0209000	1	XY
BP	GO:0006024	glycosaminoglycan biosynthetic process	1/246	11/35433	0.0909090909090909	13.0942350332594	3.35438165391245	0.0737829514244613	0.462627586230387	0.42537902424387	Crsca07aG0209000	1	XY
BP	GO:0010446	response to alkaline pH	1/246	11/35433	0.0909090909090909	13.0942350332594	3.35438165391245	0.0737829514244613	0.462627586230387	0.42537902424387	Crsca09aG0206400	1	XY
BP	GO:0016560	protein import into peroxisome matrix, docking	1/246	11/35433	0.0909090909090909	13.0942350332594	3.35438165391245	0.0737829514244613	0.462627586230387	0.42537902424387	Crsca14aG0190000	1	XY
BP	GO:0000184	nuclear-transcribed mRNA catabolic process, nonsense-mediated decay	2/246	65/35433	0.0307692307692308	4.43189493433396	2.31557940228084	0.0751061185089403	0.468233001675736	0.430533118430196	Crsca06aG0164400/Crsca02aG0230400	2	XY
BP	GO:1900424	regulation of defense response to bacterium	3/246	143/35433	0.020979020979021	3.02174654613679	2.02555092362757	0.0779661965797846	0.473053928516525	0.43496588728472	Crsca11aG0259500/Crsca13aG0236700/Crsca06aG0229000	3	XY
BP	GO:0008654	phospholipid biosynthetic process	5/246	327/35433	0.0152905198776758	2.20239427164914	1.82643561556309	0.0787042851873399	0.473053928516525	0.43496588728472	Crsca03aG0336200/Crsca17aG0212900/Crsca09aG0064400/Crsca04aG0069000/Crsca02aG0001400	5	XY
BP	GO:0009727	detection of ethylene stimulus	1/246	12/35433	0.0833333333333333	12.0030487804878	3.18748037160559	0.0802153774294749	0.473053928516525	0.43496588728472	Crsca13aG0099000	1	XY
BP	GO:0016598	protein arginylation	1/246	12/35433	0.0833333333333333	12.0030487804878	3.18748037160559	0.0802153774294749	0.473053928516525	0.43496588728472	Crsca17aG0116000	1	XY
BP	GO:0043268	positive regulation of potassium ion transport	1/246	12/35433	0.0833333333333333	12.0030487804878	3.18748037160559	0.0802153774294749	0.473053928516525	0.43496588728472	Crsca14aG0098500	1	XY
BP	GO:0043335	protein unfolding	1/246	12/35433	0.0833333333333333	12.0030487804878	3.18748037160559	0.0802153774294749	0.473053928516525	0.43496588728472	Crsca14aG0038900	1	XY
BP	GO:0071289	cellular response to nickel ion	1/246	12/35433	0.0833333333333333	12.0030487804878	3.18748037160559	0.0802153774294749	0.473053928516525	0.43496588728472	Crsca01aG0092200	1	XY
BP	GO:0080164	regulation of nitric oxide metabolic process	1/246	12/35433	0.0833333333333333	12.0030487804878	3.18748037160559	0.0802153774294749	0.473053928516525	0.43496588728472	Crsca08aG0026100	1	XY
BP	GO:1901999	homogentisate metabolic process	1/246	12/35433	0.0833333333333333	12.0030487804878	3.18748037160559	0.0802153774294749	0.473053928516525	0.43496588728472	Crsca03aG0327800	1	XY
BP	GO:1902000	homogentisate catabolic process	1/246	12/35433	0.0833333333333333	12.0030487804878	3.18748037160559	0.0802153774294749	0.473053928516525	0.43496588728472	Crsca03aG0327800	1	XY
BP	GO:0170039	proteinogenic amino acid metabolic process	6/246	433/35433	0.0138568129330254	1.99588801892638	1.74339060105582	0.0825962306495923	0.484475739993039	0.445468069094858	Crsca07aG0093000/Crsca05aG0162700/Crsca08aG0229800/Crsca07aG0146000/Crsca03aG0327800/Crsca08aG0208100	6	XY
BP	GO:0002684	positive regulation of immune system process	5/246	336/35433	0.0148809523809524	2.14340156794425	1.76079051849288	0.0859747928608613	0.492105275954505	0.452483311288189	Crsca03aG0189900/Crsca13aG0236700/Crsca17aG0250300/Crsca11aG0216700/Crsca04aG0057800	5	XY
BP	GO:0010597	green leaf volatile biosynthetic process	1/246	13/35433	0.0769230769230769	11.0797373358349	3.03928117110995	0.0866033116253574	0.492105275954505	0.452483311288189	Crsca12aG0288800	1	XY
BP	GO:0016079	synaptic vesicle exocytosis	1/246	13/35433	0.0769230769230769	11.0797373358349	3.03928117110995	0.0866033116253574	0.492105275954505	0.452483311288189	Crsca05aG0098500	1	XY
BP	GO:0017156	calcium-ion regulated exocytosis	1/246	13/35433	0.0769230769230769	11.0797373358349	3.03928117110995	0.0866033116253574	0.492105275954505	0.452483311288189	Crsca05aG0098500	1	XY
BP	GO:0019372	lipoxygenase pathway	1/246	13/35433	0.0769230769230769	11.0797373358349	3.03928117110995	0.0866033116253574	0.492105275954505	0.452483311288189	Crsca12aG0288800	1	XY
BP	GO:0070509	calcium ion import	1/246	13/35433	0.0769230769230769	11.0797373358349	3.03928117110995	0.0866033116253574	0.492105275954505	0.452483311288189	Crsca02aG0013100	1	XY
BP	GO:0000911	cytokinesis by cell plate formation	3/246	151/35433	0.0198675496688742	2.86165401389113	1.91683668994585	0.0883709605543727	0.499547761475755	0.459326563448689	Crsca15aG0200600/Crsca14aG0040500/Crsca14aG0112400	3	XY
BP	GO:0006836	neurotransmitter transport	2/246	73/35433	0.0273972602739726	3.94620781824257	2.10689526071399	0.0915927588388247	0.503700513675698	0.463144955890723	Crsca05aG0098500/Crsca12aG0151800	2	XY
BP	GO:0045047	protein targeting to ER	2/246	73/35433	0.0273972602739726	3.94620781824257	2.10689526071399	0.0915927588388247	0.503700513675698	0.463144955890723	Crsca06aG0164400/Crsca02aG0230400	2	XY
BP	GO:0072599	establishment of protein localization to endoplasmic reticulum	2/246	73/35433	0.0273972602739726	3.94620781824257	2.10689526071399	0.0915927588388247	0.503700513675698	0.463144955890723	Crsca06aG0164400/Crsca02aG0230400	2	XY
BP	GO:0001887	selenium compound metabolic process	1/246	14/35433	0.0714285714285714	10.2883275261324	2.9064152122643	0.0929470605056556	0.503700513675698	0.463144955890723	Crsca08aG0229800	1	XY
BP	GO:0009920	cell plate formation involved in plant-type cell wall biogenesis	1/246	14/35433	0.0714285714285714	10.2883275261324	2.9064152122643	0.0929470605056556	0.503700513675698	0.463144955890723	Crsca14aG0112400	1	XY
BP	GO:0009957	epidermal cell fate specification	1/246	14/35433	0.0714285714285714	10.2883275261324	2.9064152122643	0.0929470605056556	0.503700513675698	0.463144955890723	Crsca16aG0224000	1	XY
BP	GO:0010450	inflorescence meristem growth	1/246	14/35433	0.0714285714285714	10.2883275261324	2.9064152122643	0.0929470605056556	0.503700513675698	0.463144955890723	Crsca12aG0020300	1	XY
BP	GO:0061615	glycolytic process through fructose-6-phosphate	1/246	14/35433	0.0714285714285714	10.2883275261324	2.9064152122643	0.0929470605056556	0.503700513675698	0.463144955890723	Crsca10aG0150000	1	XY
BP	GO:0015914	phospholipid transport	2/246	74/35433	0.027027027027027	3.89288068556361	2.08291075010182	0.0937224603814543	0.503700513675698	0.463144955890723	Crsca07aG0217500/Crsca02aG0111900	2	XY
BP	GO:1900426	positive regulation of defense response to bacterium	2/246	74/35433	0.027027027027027	3.89288068556361	2.08291075010182	0.0937224603814543	0.503700513675698	0.463144955890723	Crsca13aG0236700/Crsca06aG0229000	2	XY
BP	GO:0006488	dolichol-linked oligosaccharide biosynthetic process	1/246	15/35433	0.0666666666666667	9.60243902439024	2.78631031268228	0.0992469284611484	0.518078463880923	0.476365262268821	Crsca09aG0064400	1	XY
BP	GO:0006983	ER overload response	1/246	15/35433	0.0666666666666667	9.60243902439024	2.78631031268228	0.0992469284611484	0.518078463880923	0.476365262268821	Crsca04aG0049000	1	XY
BP	GO:0010731	protein glutathionylation	1/246	15/35433	0.0666666666666667	9.60243902439024	2.78631031268228	0.0992469284611484	0.518078463880923	0.476365262268821	Crsca17aG0127100	1	XY
BP	GO:0030203	glycosaminoglycan metabolic process	1/246	15/35433	0.0666666666666667	9.60243902439024	2.78631031268228	0.0992469284611484	0.518078463880923	0.476365262268821	Crsca07aG0209000	1	XY
BP	GO:0042772	DNA damage response, signal transduction resulting in transcription	1/246	15/35433	0.0666666666666667	9.60243902439024	2.78631031268228	0.0992469284611484	0.518078463880923	0.476365262268821	Crsca06aG0164400	1	XY
BP	GO:0071474	cellular hyperosmotic response	1/246	15/35433	0.0666666666666667	9.60243902439024	2.78631031268228	0.0992469284611484	0.518078463880923	0.476365262268821	Crsca02aG0013100	1	XY
BP	GO:0080135	regulation of cellular response to stress	4/246	256/35433	0.015625	2.25057164634146	1.67908788401731	0.103711991752021	0.52800004868573	0.485488008488109	Crsca07aG0160200/Crsca03aG0189900/Crsca05aG0102900/Crsca12aG0009500	4	XY
BP	GO:0009682	induced systemic resistance	2/246	79/35433	0.0253164556962025	3.64649583204693	1.96897294144687	0.104579187270356	0.52800004868573	0.485488008488109	Crsca11aG0216700/Crsca04aG0057800	2	XY
BP	GO:0006695	cholesterol biosynthetic process	1/246	16/35433	0.0625	9.00228658536585	2.67696364349759	0.105503217794216	0.52800004868573	0.485488008488109	Crsca09aG0064400	1	XY
BP	GO:0006805	xenobiotic metabolic process	1/246	16/35433	0.0625	9.00228658536585	2.67696364349759	0.105503217794216	0.52800004868573	0.485488008488109	Crsca12aG0144400	1	XY
BP	GO:0010071	root meristem specification	1/246	16/35433	0.0625	9.00228658536585	2.67696364349759	0.105503217794216	0.52800004868573	0.485488008488109	Crsca08aG0170600	1	XY
BP	GO:0015825	L-serine transport	1/246	16/35433	0.0625	9.00228658536585	2.67696364349759	0.105503217794216	0.52800004868573	0.485488008488109	Crsca08aG0054500	1	XY
BP	GO:0032329	serine transport	1/246	16/35433	0.0625	9.00228658536585	2.67696364349759	0.105503217794216	0.52800004868573	0.485488008488109	Crsca08aG0054500	1	XY
BP	GO:0045540	regulation of cholesterol biosynthetic process	1/246	16/35433	0.0625	9.00228658536585	2.67696364349759	0.105503217794216	0.52800004868573	0.485488008488109	Crsca09aG0064400	1	XY
BP	GO:0106118	regulation of sterol biosynthetic process	1/246	16/35433	0.0625	9.00228658536585	2.67696364349759	0.105503217794216	0.52800004868573	0.485488008488109	Crsca09aG0064400	1	XY
BP	GO:0034976	response to endoplasmic reticulum stress	4/246	259/35433	0.0154440154440154	2.22450324889349	1.65376277043076	0.107026562488756	0.533177989384625	0.490249046151332	Crsca13aG0222700/Crsca14aG0226000/Crsca12aG0009500/Crsca04aG0049000	4	XY
BP	GO:0000077	DNA damage checkpoint signaling	2/246	81/35433	0.0246913580246914	3.55645889792231	1.92596591329213	0.109013610697073	0.534571954157089	0.491530775543158	Crsca06aG0164400/Crsca08aG0208100	2	XY
BP	GO:0006900	vesicle budding from membrane	2/246	81/35433	0.0246913580246914	3.55645889792231	1.92596591329213	0.109013610697073	0.534571954157089	0.491530775543158	Crsca07aG0217500/Crsca04aG0152000	2	XY
BP	GO:0043269	regulation of monoatomic ion transport	3/246	166/35433	0.0180722891566265	2.60307081986482	1.73099877556499	0.109332999833767	0.534571954157089	0.491530775543158	Crsca16aG0098000/Crsca14aG0098500/Crsca02aG0013100	3	XY
BP	GO:0043069	negative regulation of programmed cell death	3/246	167/35433	0.0179640718562874	2.58748356944647	1.71934741366923	0.110793661498612	0.534571954157089	0.491530775543158	Crsca07aG0160200/Crsca03aG0189900/Crsca04aG0049000	3	XY
BP	GO:0006572	L-tyrosine catabolic process	1/246	17/35433	0.0588235294117647	8.47274031563845	2.57678903219402	0.111716228733104	0.534571954157089	0.491530775543158	Crsca03aG0327800	1	XY
BP	GO:0046475	glycerophospholipid catabolic process	1/246	17/35433	0.0588235294117647	8.47274031563845	2.57678903219402	0.111716228733104	0.534571954157089	0.491530775543158	Crsca08aG0262700	1	XY
BP	GO:0060359	response to ammonium ion	1/246	17/35433	0.0588235294117647	8.47274031563845	2.57678903219402	0.111716228733104	0.534571954157089	0.491530775543158	Crsca12aG0087300	1	XY
BP	GO:0080027	response to herbivore	1/246	17/35433	0.0588235294117647	8.47274031563845	2.57678903219402	0.111716228733104	0.534571954157089	0.491530775543158	Crsca12aG0288800	1	XY
BP	GO:1905898	positive regulation of response to endoplasmic reticulum stress	1/246	17/35433	0.0588235294117647	8.47274031563845	2.57678903219402	0.111716228733104	0.534571954157089	0.491530775543158	Crsca12aG0009500	1	XY
BP	GO:0032147	activation of protein kinase activity	3/246	169/35433	0.0177514792899408	2.55686246211575	1.69629772631984	0.113737471729672	0.541867168808175	0.498238614380038	Crsca05aG0060700/Crsca01aG0135200/Crsca12aG0130500	3	XY
BP	GO:1902410	mitotic cytokinetic process	3/246	170/35433	0.0176470588235294	2.54182209469153	1.6848970260517	0.115220484025912	0.544974190913986	0.501095473916763	Crsca15aG0200600/Crsca14aG0040500/Crsca14aG0112400	3	XY
BP	GO:0051090	regulation of DNA-binding transcription factor activity	2/246	84/35433	0.0238095238095238	3.4294425087108	1.86394017753596	0.115756478850954	0.544974190913986	0.501095473916763	Crsca12aG0253200/Crsca16aG0102300	2	XY
BP	GO:0009445	putrescine metabolic process	1/246	18/35433	0.0555555555555556	8.0020325203252	2.48451154778985	0.117886259446105	0.544974190913986	0.501095473916763	Crsca03aG0089700	1	XY
BP	GO:0009446	putrescine biosynthetic process	1/246	18/35433	0.0555555555555556	8.0020325203252	2.48451154778985	0.117886259446105	0.544974190913986	0.501095473916763	Crsca03aG0089700	1	XY
BP	GO:0010045	response to nickel cation	1/246	18/35433	0.0555555555555556	8.0020325203252	2.48451154778985	0.117886259446105	0.544974190913986	0.501095473916763	Crsca01aG0092200	1	XY
BP	GO:0044001	migration in host	1/246	18/35433	0.0555555555555556	8.0020325203252	2.48451154778985	0.117886259446105	0.544974190913986	0.501095473916763	Crsca08aG0170600	1	XY
BP	GO:0046739	transport of virus in multicellular host	1/246	18/35433	0.0555555555555556	8.0020325203252	2.48451154778985	0.117886259446105	0.544974190913986	0.501095473916763	Crsca08aG0170600	1	XY
BP	GO:1901293	nucleoside phosphate biosynthetic process	6/246	480/35433	0.0125	1.80045731707317	1.47635512433154	0.118952938217927	0.547585044707842	0.503496114242436	Crsca10aG0150000/Crsca07aG0209000/Crsca13aG0160800/Crsca06aG0197000/Crsca07aG0189000/Crsca06aG0147300	6	XY
BP	GO:0016132	brassinosteroid biosynthetic process	2/246	86/35433	0.0232558139534884	3.34968803176404	1.82413685165173	0.120309	0.551502191160015	0.507097870785367	Crsca04aG0002300/Crsca14aG0219100	2	XY
BP	GO:0097237	cellular response to toxic substance	5/246	375/35433	0.0133333333333333	1.92048780487805	1.49835379208714	0.121322077116366	0.553817515204835	0.509226776004831	Crsca14aG0140200/Crsca03aG0056900/Crsca15aG0017000/Crsca01aG0103400/Crsca12aG0192700	5	XY
BP	GO:0015695	organic cation transport	2/246	87/35433	0.0229885057471264	3.31118587047939	1.80467345448693	0.12260230929451	0.555657977323783	0.51091905291096	Crsca07aG0064000/Crsca08aG0054500	2	XY
BP	GO:0032506	cytokinetic process	3/246	175/35433	0.0171428571428571	2.46919860627178	1.62908956557305	0.122743879500487	0.555657977323783	0.51091905291096	Crsca15aG0200600/Crsca14aG0040500/Crsca14aG0112400	3	XY
BP	GO:0032042	mitochondrial DNA metabolic process	1/246	19/35433	0.0526315789473684	7.5808729139923	2.39909297877689	0.124013606055628	0.556785367105722	0.51195567065633	Crsca14aG0190000	1	XY
BP	GO:0050810	regulation of steroid biosynthetic process	1/246	19/35433	0.0526315789473684	7.5808729139923	2.39909297877689	0.124013606055628	0.556785367105722	0.51195567065633	Crsca09aG0064400	1	XY
BP	GO:0030258	lipid modification	5/246	379/35433	0.0131926121372032	1.90021880429886	1.47323884362617	0.125283672981675	0.557832507383099	0.51291850020367	Crsca08aG0118300/Crsca13aG0160300/Crsca12aG0288800/Crsca02aG0158000/Crsca13aG0112100	5	XY
BP	GO:0002181	cytoplasmic translation	3/246	177/35433	0.0169491525423729	2.44129805704837	1.60730458026018	0.125802510494031	0.557832507383099	0.51291850020367	Crsca06aG0164400/Crsca02aG0230400/Crsca12aG0130500	3	XY
BP	GO:0015850	organic hydroxy compound transport	2/246	89/35433	0.0224719101123595	3.23677719923267	1.76658341066057	0.127219881635042	0.557832507383099	0.51291850020367	Crsca03aG0108900/Crsca17aG0024800	2	XY
BP	GO:0006413	translational initiation	3/246	179/35433	0.0167597765363128	2.41402098378526	1.58581468953846	0.128888469763573	0.557832507383099	0.51291850020367	Crsca06aG0164400/Crsca02aG0230400/Crsca06aG0109600	3	XY
BP	GO:0009612	response to mechanical stimulus	2/246	90/35433	0.0222222222222222	3.20081300813008	1.74794176878912	0.129544003123968	0.557832507383099	0.51291850020367	Crsca15aG0200600/Crsca14aG0040500	2	XY
BP	GO:0043065	positive regulation of apoptotic process	2/246	90/35433	0.0222222222222222	3.20081300813008	1.74794176878912	0.129544003123968	0.557832507383099	0.51291850020367	Crsca06aG0164400/Crsca02aG0230400	2	XY
BP	GO:0006544	glycine metabolic process	1/246	20/35433	0.05	7.20182926829268	2.31967803976276	0.130098562652181	0.557832507383099	0.51291850020367	Crsca05aG0162700	1	XY
BP	GO:0006971	hypotonic response	1/246	20/35433	0.05	7.20182926829268	2.31967803976276	0.130098562652181	0.557832507383099	0.51291850020367	Crsca11aG0263700	1	XY
BP	GO:0006984	ER-nucleus signaling pathway	1/246	20/35433	0.05	7.20182926829268	2.31967803976276	0.130098562652181	0.557832507383099	0.51291850020367	Crsca04aG0049000	1	XY
BP	GO:0048168	regulation of neuronal synaptic plasticity	1/246	20/35433	0.05	7.20182926829268	2.31967803976276	0.130098562652181	0.557832507383099	0.51291850020367	Crsca12aG0151800	1	XY
BP	GO:0042430	indole-containing compound metabolic process	3/246	181/35433	0.0165745856353591	2.38734671877105	1.56461210067141	0.132001204011893	0.557832507383099	0.51291850020367	Crsca05aG0102900/Crsca11aG0048000/Crsca08aG0208100	3	XY
BP	GO:0050776	regulation of immune response	6/246	497/35433	0.0120724346076459	1.73887225793787	1.38702801259264	0.133790080536534	0.557832507383099	0.51291850020367	Crsca07aG0160200/Crsca03aG0189900/Crsca13aG0236700/Crsca17aG0250300/Crsca11aG0216700/Crsca04aG0057800	6	XY
[truncated: 10,421 more rows]

## Sheet: Supplemental Table S6
Supplemental Table S6. Differential expression analysis of genes with dynamic expression changes during hawthorn leaf cell development
[truncated: 4,476 more rows]

## Sheet: Supplemental Table S7
Supplemental Table S7. Average gene expression across hawthorn leaf cell-type and species combinations
[truncated: 2,001 more rows]
